# Supplementary material for: An antisense oligonucleotide-based strategy to ameliorate cognitive dysfunction in the 22q11.2 Deletion Syndrome
Source: eLife journal article supplement (doi:10.7554/elife.103328), 2024-11-18
Supplement: fig1-data1 [file elife-103328-fig1-data1-v1.pdf]

**G**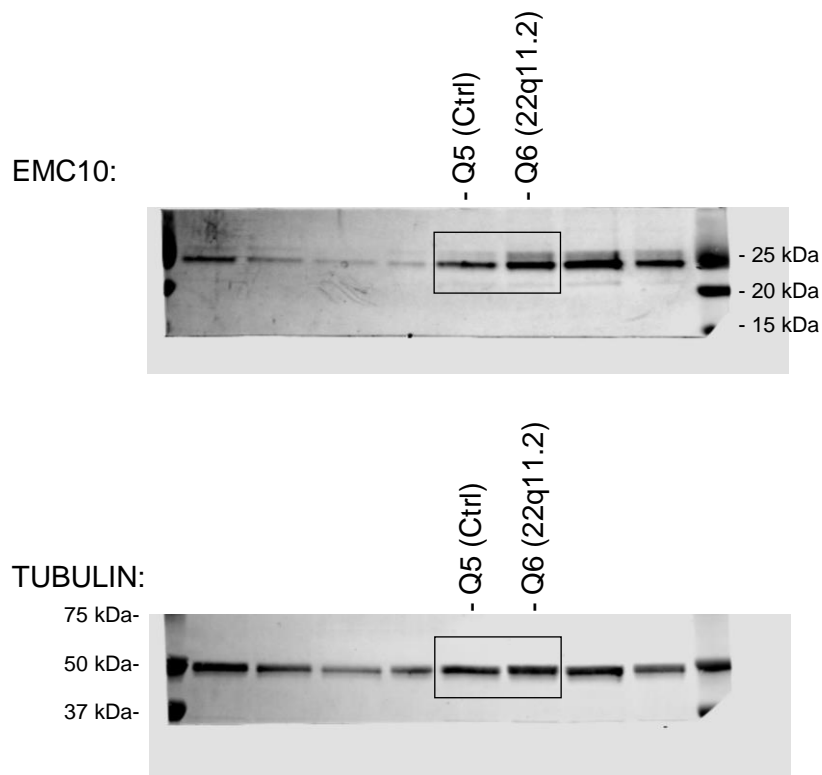

**Figure 1-source data 1.** Original membranes corresponding to Figure 1G, with relevant bands and loading controls indicated. Boxed samples are shown in Figure 1 panel G. For all membranes the Precision Plus Protein Dual Color Standards (Bio-Rad, Hercules, CA, USA) molecular weight marker was used. Western blot analysis showing upregulated EMC10 protein levels in Q6 (22q11.2) line derived cortical neurons at day 8 of differentiation. Tubulin was probed as a loading control.
