# Supplementary material for: An antisense oligonucleotide-based strategy to ameliorate cognitive dysfunction in the 22q11.2 Deletion Syndrome
Source: eLife journal article supplement (doi:10.7554/elife.103328), 2024-11-18
Supplement: fig1-figsupp1-data1 [file elife-103328-fig1-figsupp1-data1-v1.pdf]

D

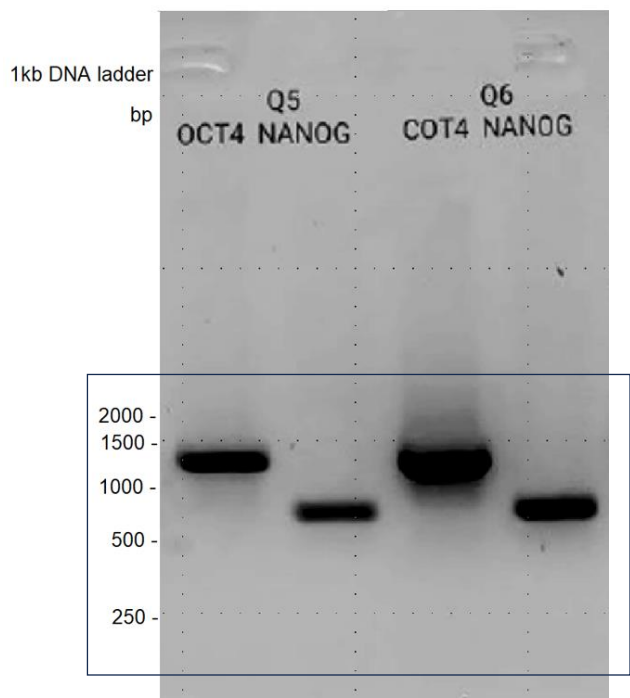

**Figure 1-figure supplement 1-source data 1.** Original gel corresponding to Figure 1-figure supplement 1D, with relevant bands indicated. Boxed samples are shown in Figure 1-figure supplement panel 1D. The presented gel shows the result of the qRT-PCR assays of embryonic stem cell markers *OCT4/POU5F1* and *NANOG*. The gel shows that they are highly expressed in both hiPSC lines (Q5 Ctrl and Q6 22q11.2).
