# Supplementary material for: An antisense oligonucleotide-based strategy to ameliorate cognitive dysfunction in the 22q11.2 Deletion Syndrome
Source: eLife journal article supplement (doi:10.7554/elife.103328), 2024-11-18
Supplement: fig4-figsupp3-data1 [file elife-103328-fig4-figsupp3-data1-v1.pdf]

D

Emc10 (left HPC):

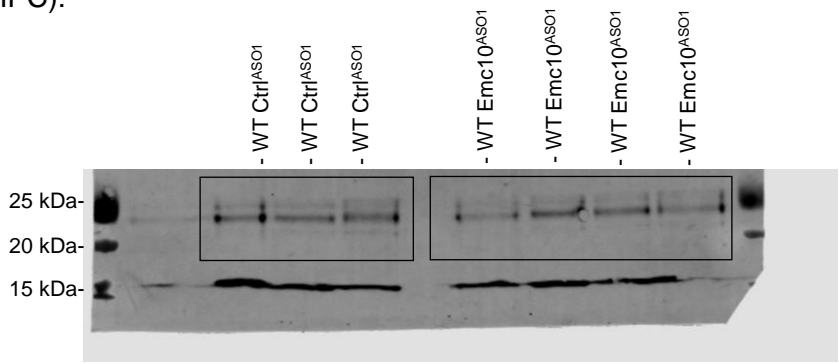

Tubulin (left HPC):

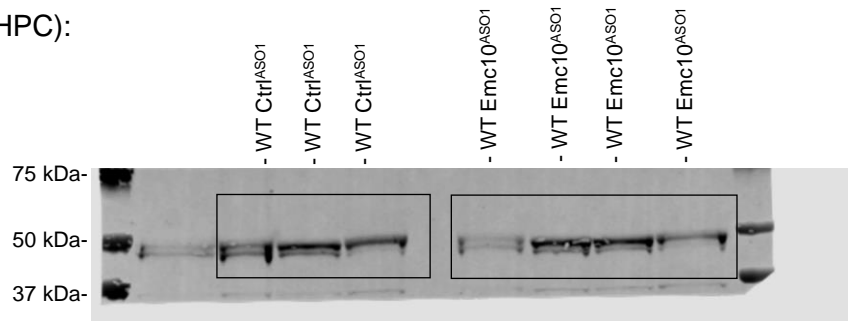

Emc10 (right HPC):

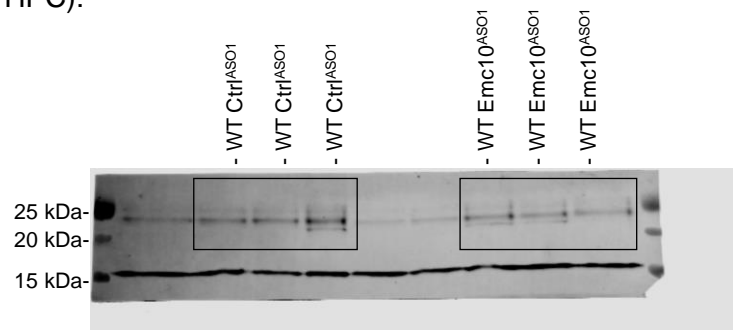

Tubulin (right HPC):

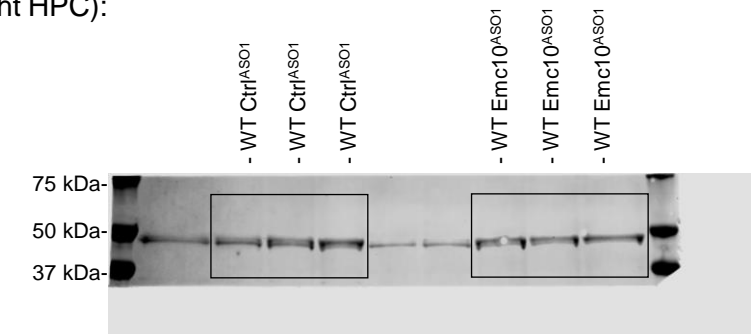

**Figure 4-figure supplement 3-source data 1.** Original membranes corresponding to Figure 4-figure supplement 3D, left and right HPC, with relevant bands and loading controls indicated. Boxed samples were used for quantification shown in Figure 4-figure supplement panel 3D. For all membranes the Precision Plus Protein Dual Color Standards (Bio-Rad, Hercules, CA, USA) molecular weight marker was used. Western blot shows reduction of Emc10 protein expression in the left and right HPC after ASO treatment. Tubulin was used as loading control.
