# Supplementary material for: An antisense oligonucleotide-based strategy to ameliorate cognitive dysfunction in the 22q11.2 Deletion Syndrome
Source: eLife. 2025 May 27;13:RP103328. doi: 10.7554/eLife.103328 (PMC12113277; doi:10.7554/eLife.103328)
Supplement: Supplementary file 1. [file elife-103328-supp1.xlsx]

## Sheet: Supp File 1
Supplementary File 1. Clinical and demographic characteristics of 22q11.2DS/SCZ patients and healthy controls.
Columbia ID	Rutgers University ID	Gender	Diagnosis
QR20 (1)	MH0159020	male	none
QR27 (1)	MH0159027	male	schizoaffective disorder/22q11.2DS
Q1 (2*)	-	male	schizophrenia/22q11.2DS
Q2 (2*)	-	male	none
Q5 (2**)	-	female	none
Q6 (2**)	-	female	schizophrenia/22q11.2DS
(1) hiPSC lines were obtained from the Stem Cell Repository of National Institute of Mental Health
(2) hiPSC lines were generated by the Columbia Stem Cell Core Facility
*sibling pair
**sibling pair, same age
