# Supplementary material for: An antisense oligonucleotide-based strategy to ameliorate cognitive dysfunction in the 22q11.2 Deletion Syndrome
Source: eLife. 2025 May 27;13:RP103328. doi: 10.7554/eLife.103328 (PMC12113277; doi:10.7554/eLife.103328)
Supplement: Supplementary file 2. [file elife-103328-supp2.xlsx]

## Sheet: Supp File 2
Supplementary File 2. Differentially expressed microRNAs in cortical neurons (DIV8) from 22q11.2DS/SCZ (Q6) and control line (Q5) derived using small-molecule inhibitors of SMAD and WNT signaling pathways. Log2FC threshold (cutoff) >0.4. Red indicates Pvalue<0.001, orange indicates Pvalue <0.01, blue indicates Pvalue<0.05, green indicates Pvalue <0.1, Students t-test.
miR_name	miR_seq	up/down	fold_change(Q6_SCZ_22q11DS(mean)/Q5_Ctrl(mean))	log2(fold_change)	pvalue(t_test)	Q5_Ctrl(mean)	Q6_SCZ_22q11DS(mean)	Q5_Ctrl/Q5_Ctrl_1(norm)	Q5_Ctrl/Q5_Ctrl_2(norm)	Q5_Ctrl/Q5_Ctrl_3(norm)	Q6_SCZ_22q11DS/Q6_SCZ_22q11DS_1(norm)	Q6_SCZ_22q11DS/Q6_SCZ_22q11DS_2(norm)	Q6_SCZ_22q11DS/Q6_SCZ_22q11DS_3(norm)	Q5_Ctrl/Q5_Ctrl_1(raw)	Q5_Ctrl/Q5_Ctrl_2(raw)	Q5_Ctrl/Q5_Ctrl_3(raw)	Q6_SCZ_22q11DS/Q6_SCZ_22q11DS_1(raw)	Q6_SCZ_22q11DS/Q6_SCZ_22q11DS_2(raw)	Q6_SCZ_22q11DS/Q6_SCZ_22q11DS_3(raw)	Expression level
hsa-miR-365b-5p	GAGGGACTTTCAGGGGCAGCTGT	up	12.4005	3.63233	8.38393e-06	20.152	249.895	23.2789	16.798	20.3791	246.799	256.783	246.103	29	20	23	235	213	188	middle
hsa-miR-361-5p	TTATCAGAATCTCCAGGGGTAC	up	2.80792	1.4895	8.98758e-06	10822	30387.2	10327.8	11123.6	11014.5	30733.3	29614.4	30813.9	12866	13244	12431	29264	24565	23539	high
hsa-miR-652-3p	AATGGCGCCACTAGGGTTGTGT	up	2.33551	1.22374	2.58061e-05	2488.44	5811.76	2593.59	2318.12	2553.59	5775.09	5743.26	5916.94	3231	2760	2882	5499	4764	4520	middle
hsa-miR-193a-3p	AACTGGCCTACAAAGTCCCAGT	up	19.1203	4.25703	3.0109e-05	3.808	72.8101	7.22449	4.1995	0	75.6149	74.7444	68.071	9	5	0	72	62	52	middle
hsa-miR-27b-3p	TTCACAGTGGCTAAGTTCTGC	up	1.95755	0.969046	7.84077e-05	37581.9	73568.2	34704.4	39633.2	38408	72808.3	76596.1	71300.4	43233.5	47188	43347.5	69327.5	63536	54467	high
hsa-miR-95-3p	TTCAACGGGTATTTATTGAGCA	up	1.80437	0.851498	9.45107e-05	615.714	1110.98	573.143	647.563	626.437	1124.77	1130.81	1077.35	714	771	707	1071	938	823	middle
hsa-miR-23b-3p	ATCACATTGCCAGGGATTACCAC	up	1.97616	0.982698	0.000106666	10092.4	19944.2	10501.6	9192.71	10583	20569.9	20215.3	19047.4	13082.5	10945	11944	19586.5	16768.5	14550.5	high
hsa-miR-139-5p	TCTACAGTGCACGTGTCTCCAGT	up	2.27577	1.18635	0.000109975	1031.55	2347.56	1119.8	938.169	1036.68	2309.41	2412.31	2320.96	1395	1117	1170	2199	2001	1773	middle
hsa-miR-219a-1-3p	AGAGTTGAGTCTGGACGTCCCG	up	3.21959	1.68688	0.000153725	300.208	966.547	336.34	260.369	303.915	1011.35	983.732	904.558	419	310	343	963	816	691	middle
hsa-miR-505-3p	CGTCAACACTTGCTGGTTTCCTCT	up	2.07965	1.05634	0.000241477	2669.06	5550.71	2441.88	2644.01	2921.3	5619.66	5644.4	5388.08	3042	3148	3297	5351	4682	4116	middle
hsa-miR-361-3p	TCCCCCAGGTGTGATTCTGATTT	up	2.49872	1.32119	0.000279904	1872.85	4679.73	1566.11	1893.14	2159.3	4424.52	4959.65	4655.01	1951	2254	2437	4213	4114	3556	middle
hsa-miR-3675-5p	ATGGGGCTTCTGTAGAGATTTC	down	0.0635519	-3.97592	0.000491785	41.1965	2.61811	44.1496	37.7955	41.6443	0	0	7.85434	55	45	47	0	0	6	middle
hsa-miR-92b-3p	TATTGCACTCGTCCCGGCCTCC	up	2.10489	1.07374	0.000558128	62115.6	130746	61795.3	53722.5	70829	121922	132262	138055	76982.3	63963	79938	116093	109710	105462	high
hsa-miR-148a-5p	AAAGTTCTGAGACACTCCGACT	up	2.03991	1.0285	0.000708588	279.798	570.763	276.939	245.251	317.206	605.97	577.46	528.859	345	292	358	577	479	404	middle
hsa-miR-372-3p	AAAGTGCTGCGACATTTGAGCGT	down	0.272266	-1.87691	0.00073575	2264.45	616.531	2189.02	2250.09	2354.23	610.17	628.094	611.33	2727	2679	2657	581	521	467	middle
hsa-miR-339-5p	TCCCTGTCCTCCAGGAGCTCACG	up	2.08892	1.06276	0.000744071	11122.7	23234.3	10130.3	10270.3	12967.3	24030.8	21402.2	24269.9	12620	12228	14635	22882	17753	18540	high
hsa-miR-30d-5p	TGTAAACATCCCCGACTGGAAGCT	up	1.99571	0.996904	0.000801797	50349.1	100482	49510.6	44757.5	56779.4	105172	103867	92408.3	61678.5	53289	64081.5	100144	86157	70591.5	high
hsa-miR-29b-2-5p	CTGGTTTCACATGGTGGCTTAGAT	up	2.4825	1.31179	0.000944293	124.118	308.123	109.973	110.867	151.514	314.012	331.527	278.829	137	132	171	299	275	213	middle
hsa-miR-301a-5p	GCTCTGACTTTATTGCACTACT	up	1.42809	0.514086	0.00113683	663.161	947.053	627.728	711.396	650.36	918.931	939.127	983.102	782	847	734	875	779	751	middle
hsa-miR-592	TTGTGTCAATATGCGATGATGT	up	4.17397	2.06142	0.0011475	89.8705	375.117	102.748	91.5491	75.3142	407.48	344.788	373.081	128	109	85	388	286	285	middle
hsa-miR-371a-5p	ACTCAAACTGTGGGGGCACTTT	down	0.32155	-1.63688	0.00127281	573.479	184.402	628.53	510.659	581.248	133.376	248.344	171.486	783	608	656	127	206	131	middle
hsa-miR-512-3p	AAGTGCTGTCATAGCTGAGGTCA	down	0.750753	-0.413589	0.00129653	542.741	407.464	523.374	549.295	555.553	425.334	413.505	383.554	652	654	627	405	343	293	middle
hsa-miR-598-3p	TACGTCATCGTTGTCATCGTCA	up	1.85027	0.887733	0.00138615	1209.21	2237.35	1025.07	1350.56	1251.99	2378.72	2221.84	2111.51	1277	1608	1413	2265	1843	1613	middle
hsa-miR-125a-5p	TCCCTGAGACCCTTTAACCTGTGA	up	2.17238	1.11928	0.00146095	28518.8	61953.6	25036.9	26905.4	33614.1	60485.6	60741.8	64633.4	31190	32034	37937	57594	50385	49374	high
hsa-miR-488-5p	CCCAGATAATGGCACTCTCAAAC	up	2.32244	1.21564	0.00150136	205.647	477.602	195.061	207.455	214.424	473.644	507.538	451.625	243	247	242	451	421	345	middle
hsa-miR-373-3p	GAAGTGCTTCGATTTTGGGGTGT	down	0.223611	-2.16094	0.00150263	459.928	102.845	475.211	420.79	483.783	94.5187	114.528	99.4883	592	501	546	90	95	76	middle
hsa-miR-1294	TGTGAGGTTGGCATTGTTGTCT	up	3.12991	1.64612	0.00159023	20.4751	64.0854	22.4762	16.798	22.1512	60.912	71.1277	60.2166	28	20	25	58	59	46	middle
hsa-miR-193b-5p	CGGGGTTTTGAGGGCGAGATGA	up	1.6738	0.743131	0.00162096	194.111	324.904	184.626	179.739	217.968	329.765	309.827	335.119	230	214	246	314	257	256	middle
hsa-miR-26a-5p	TTCAAGTAATCCAGGATAGGCT	up	1.87955	0.910386	0.00171372	57409.6	107904	48331.2	60021.1	63876.6	117329	105276	101107	60209.2	71462.2	72091.5	111720	87325.7	77236.8	high
hsa-miR-365b-3p	TAATGCCCCTAAAAATCCTTAT	up	2.6772	1.42073	0.00181351	1062.22	2843.78	1284.35	823.102	1079.21	3181.08	2575.06	2775.2	1600	980	1218	3029	2136	2120	middle
hsa-miR-100-5p	AACCCGTAGATCCGAACTTGTG	up	2.11485	1.08056	0.00192734	2439.63	5159.46	2731.66	1980.49	2606.76	5707.88	4974.12	4796.38	3403	2358	2942	5435	4126	3664	middle
hsa-miR-574-5p	TGAGTGTGTGTGTGTGAGTGTGT	up	1.55519	0.637089	0.00196315	478.343	743.913	433.469	477.903	523.655	723.593	730.566	777.58	540	569	591	689	606	594	middle
hsa-miR-185-5p	TGGAGAGAAAGGCAGTTCCTGA	down	0.401588	-1.31621	0.00200939	9972.65	4004.9	9165.47	9911.66	10840.8	4159.87	4294.18	3560.63	11418	11801	12235	3961	3562	2720	high
hsa-miR-548ah-5p	AAAAGTGATTGCAGTGTTTGCC	up	2.23871	1.16267	0.00201	86.6963	194.088	67.4285	105.827	86.8328	194.288	177.216	210.758	84	126	98	185	147	161	middle
hsa-miR-504-5p	AGACCCTGGTCTGCACTCTATC	up	4.28575	2.09955	0.00217076	2187.71	9375.98	2200.26	1871.3	2491.57	8438.42	10170.1	9519.46	2741	2228	2812	8035	8436	7272	high
hsa-miR-339-3p	TGAGCGCCTCGACGACAGAGCC	up	1.71823	0.780926	0.00221212	2120.02	3642.68	2051.75	2090.51	2217.78	3873.16	3472	3582.89	2556	2489	2503	3688	2880	2737	middle
hsa-miR-708-3p	AACTAGACTGTGAGCTTCTAGA	up	1.7447	0.80298	0.00239184	2346.53	4093.99	2374.45	2497.86	2167.28	4415.07	4031.37	3835.54	2958	2974	2446	4204	3344	2930	middle
hsa-miR-23a-5p	GGGGTTCCTGGGGATGGGATTT	down	0.143243	-2.80346	0.00245505	37.226	5.33238	31.3061	36.9556	43.4164	9.45187	0	6.54528	39	44	49	9	0	5	middle
hsa-miR-664a-5p	CTGGCTAGGGAAAATGATTGGA	up	1.70777	0.772113	0.00250525	56.3355	96.2081	50.5714	53.7536	64.6816	98.7195	90.4166	99.4883	63	64	73	94	75	76	middle
hsa-miR-548av-3p	CAAAAACTGCAGTTACTTTTGC	up	2.43239	1.28238	0.00260423	82.2816	200.141	56.1905	97.9884	92.666	200.94	218.507	180.977	70	116.667	104.583	191.333	181.25	138.25	middle
hsa-mir-548p-p3	CAAAAACTGCAGTTACTTTTGC	up	2.43239	1.28238	0.00260423	82.2816	200.141	56.1905	97.9884	92.666	200.94	218.507	180.977	70	116.667	104.583	191.333	181.25	138.25	middle
hsa-mir-218-1-p3	AAACATGGTTCCGTCAAGCACC	up	3.62611	1.85842	0.0027429	15.4066	55.8661	7.22449	15.9581	23.0373	48.3095	59.0722	60.2166	9	19	26	46	49	46	middle
hsa-miR-185-3p	AGGGGCTGGCTTTCCTCTGGT	down	0.368593	-1.4399	0.00280669	206.197	76.0028	227.973	179.739	210.88	67.2133	94.0332	66.7619	284	214	238	64	78	51	middle
hsa-miR-584-5p	TTATGGTTTGCCTGGGACTGA	up	9.33607	3.22282	0.0028109	35.1368	328.04	33.7143	33.596	38.1001	360.221	311.033	312.865	42	40	43	343	258	239	middle
hsa-miR-1251-5p	ACTCTAGCTGCCAAAGGCGCT	up	2.89192	1.53203	0.00285192	1738.37	5027.22	2262.07	1647.88	1305.15	5568.2	4308.65	5204.81	2818	1962	1473	5302	3574	3976	middle
hsa-miR-1306-3p	ACGTTGGCTCTGGTGGTGATGT	down	0.258565	-1.9514	0.00297385	170.077	43.976	150.912	168.82	190.501	47.2593	50.6333	34.0355	188	201	215	45	42	26	middle
hsa-miR-494-3p	TGAAACATACACGGGAAACCTCT	down	0.623335	-0.68192	0.00304164	200.258	124.828	184.626	215.014	201.133	138.627	119.35	116.506	230	256	227	132	99	89	middle
hsa-miR-1271-5p	CTTGGCACCTAGCAAGCACTCA	up	1.47363	0.559376	0.00312501	1843.11	2716.06	1890.41	1710.88	1928.04	2625.52	2915.03	2607.64	2355	2037	2176	2500	2418	1992	middle
hsa-miR-92a-2-5p	GGGTGGGGATTTGTTGCATTACT	up	1.86296	0.897595	0.00325848	162.382	302.511	155.728	144.463	186.956	299.309	295.361	312.865	194	172	211	285	245	239	middle
hsa-miR-135a-3p	ATATAGGGATTGGAGCCGTGGC	down	0.661344	-0.596528	0.00333979	114.478	75.7093	120.408	117.586	105.44	74.5647	83.1832	69.38	150	140	119	71	69	53	middle
hsa-miR-2355-3p	TGTCCTTGCTGTTTGGAGATAA	down	0.503016	-0.991323	0.00335547	123.731	62.2389	129.238	111.707	130.249	48.3095	65.0999	73.3072	161	133	147	46	54	56	middle
hsa-miR-885-5p	TCCATTACACTACCCTGCCTCT	down	0.671584	-0.574361	0.00369376	109.476	73.5224	113.986	112.547	101.896	75.6149	65.0999	79.8525	142	134	115	72	54	61	middle
hsa-miR-424-3p	CAAAACGTGAGGCGCTGCTAT	up	2.18212	1.12573	0.00380307	157.091	342.792	123.619	155.382	192.273	327.665	361.666	339.046	154	185	217	312	300	259	middle
hsa-miR-132-3p	TAACAGTCTACAGCCATGGTCG	up	1.52117	0.605186	0.00381066	902.204	1372.41	791.483	976.804	938.326	1446.14	1334.55	1336.55	986	1163	1059	1377	1107	1021	middle
hsa-miR-1251-3p	CGCTTTGCTCAGCCAGTGTAG	up	2.36094	1.23936	0.00387434	68.7836	162.394	76.2585	51.2339	78.8584	163.832	167.572	155.778	95	61	89	156	139	119	middle
hsa-miR-219a-2-3p	AGAATTGTGGCTGGACATCTGT	up	3.11863	1.64091	0.00394223	1112.2	3468.54	1451.32	891.134	994.147	3940.38	3493.7	2971.56	1808	1061	1122	3752	2898	2270	middle
hsa-miR-3913-5p	TTTGGGACTGATCTTGATGTCT	up	2.54942	1.35017	0.00394736	18.6646	47.584	22.4762	18.8978	14.6198	50.9351	51.2361	40.5808	28	22.5	16.5	48.5	42.5	31	middle
hsa-miR-193a-5p	TGGGTCTTTGCGGGCGAGATGA	up	11.1675	3.48124	0.0039764	362.264	4045.6	406.177	304.044	376.571	4472.83	3620.28	4043.68	506	362	425	4259	3003	3089	middle
hsa-miR-874-3p	CTGCCCTGGCCCGAGGGACCGAC	up	1.56526	0.646403	0.00397821	4743.03	7424.08	5228.12	4151.63	4849.35	7106.75	7409.34	7756.16	6513	4943	5473	6767	6146	5925	high
hsa-miR-488-3p	TTGAAAGGCTATTTCTTGGTC	up	2.13266	1.09265	0.00410207	345.698	737.257	388.517	387.194	261.385	778.204	714.894	718.672	484	461	295	741	593	549	middle
hsa-miR-486-3p	CGGGGCAGCTCAGTACAGGAT	down	0.305649	-1.71005	0.00449776	61.4049	18.7683	57.7959	69.7117	56.7072	16.2782	21.7	18.3268	72	83	64	15.5	18	14	middle
hsa-miR-146a-5p	TGAGAACTGAATTCCATGGGTT	down	0.423472	-1.23966	0.00462608	657.792	278.557	571.537	675.28	726.56	307.711	300.183	227.776	712	804	820	293	249	174	middle
hsa-miR-1287-5p	TGCTGGATCAGTGGTTCGAGTC	up	2.17416	1.12046	0.00471673	416.187	904.857	399.755	435.908	412.899	984.044	884.877	845.651	498	519	466	937	734	646	middle
hsa-miR-9901	GTCCCGGTCGCCGCGGTTCGCCGC	up	1.90951	0.9332	0.00478675	74.8754	142.975	74.653	76.4309	73.5421	139.678	153.105	136.142	93	91	83	133	127	104	middle
hsa-miR-4803	TAACATAATAGTGTGGATTGAA	down	0.0835236	-3.58167	0.00478694	24.0562	2.00926	23.2789	29.3965	19.4931	0	6.02777	0	29	35	22	0	5	0	middle
hsa-miR-505-5p	GGGAGCCAGGAAGTATTGATGTT	up	2.74501	1.45681	0.00493863	68.0591	186.823	61.8095	69.7117	72.656	166.983	189.272	204.213	77	83	82	159	157	156	middle
hsa-miR-1185-1-3p	ATATACAGGGGGAGACTCTTAT	down	0.330216	-1.59852	0.00514973	51.8569	17.124	42.5442	55.4334	57.5932	11.5523	24.1111	15.7087	53	66	65	11	20	12	middle
hsa-miR-664a-3p	TATTCATTTATCCCCAGCCTACA	up	1.83891	0.878852	0.00517655	265.822	488.824	297.007	212.495	287.966	489.397	512.361	464.715	370	253	325	466	425	355	middle
hsa-miR-125b-1-3p	ACGGGTTAGGCTCTTGGGAGCT	up	8.73547	3.12688	0.00536661	206.072	1800.14	216.735	175.539	225.943	2046.85	1664.87	1688.68	270	209	255	1949	1381	1290	middle
hsa-miR-140-3p	ACCACAGGGTAGAACCACGGAC	up	1.40654	0.492149	0.00560108	13887.9	19533.8	13785.1	12677.5	15201.1	19628.4	20768.1	18205.1	17173	15094	17156	18690	17227	13907	high
hsa-miR-7974	AGGCTGTGATGCTCTCCTGAGCCC	down	0.320513	-1.64155	0.00567489	207.885	66.6299	207.905	173.859	241.891	47.2593	97.6499	54.9804	259	207	273	45	81	42	middle
hsa-miR-130b-5p	ACTCTTTCCCTGTTGCACTACT	up	1.38669	0.471644	0.00580774	7795.6	10810.1	7092.84	7813.59	8480.38	11532.3	10717.4	10180.5	8836	9303	9571	10981	8890	7777	high
hsa-miR-5579-3p	TTAGCTTAAGGAGTGCCAGATC	down	0.376688	-1.40856	0.0058756	16.8394	6.34322	15.2517	19.3177	15.9489	5.25104	7.23332	6.54528	19	23	18	5	6	5	middle
hsa-miR-107	AGCAGCATTGTACAGGGCTAT	up	1.45061	0.536655	0.00618864	5040.97	7312.46	4451.35	5198.14	5473.42	7903.86	7135.68	6897.86	5545.33	6189	6177.33	7526	5919	5269.33	high
hsa-miR-4705	TCAATCACTTGGTAATTGCTGT	down	0.406618	-1.29825	0.0065003	56.6943	23.0529	61.8095	61.3127	46.9606	27.3054	15.6722	26.1811	77	73	53	26	13	20	middle
hsa-miR-1262	ATGGGTGAATTTGTAGAAGGAT	up	1.93581	0.952934	0.00658814	128.789	249.31	103.551	125.985	156.831	283.556	232.672	231.703	129	150	177	270	193	177	middle
hsa-miR-7-5p	TGGAAGACTAGTGATTTTGTTGTT	down	0.454262	-1.1384	0.00676045	29255.8	13289.8	29240.2	33294.5	25232.6	11160.2	17130.1	11579	36426.3	39641	28477.7	10626.7	14209.3	8845.33	high
hsa-miR-1269a	CTGGACTGAGCCGTGCTACTGG	up	2.53645	1.34281	0.00683683	686.286	1740.73	674.285	650.923	733.649	1546.96	1897.54	1777.7	840	775	828	1473	1574	1358	middle
hsa-miR-874-5p	CGGCCCCACGCACCAGGGTAAGA	up	1.7526	0.809497	0.00710457	48.2256	84.5201	52.1769	41.995	50.5048	92.4182	74.7444	86.3978	65	50	57	88	62	66	middle
hsa-miR-508-3p	TGATTGTAGCCTTTTGGAGTAGA	down	0.46652	-1.09999	0.00731942	35.6224	16.6185	38.5306	30.2364	38.1001	15.7531	14.4666	19.6359	48	36	43	15	12	15	middle
hsa-miR-328-3p	CTGGCCCTCTCTGCCCTTCCGT	up	1.89695	0.923683	0.0074336	1778.16	3373.08	2258.05	1547.1	1529.32	3056.1	3391.22	3671.9	2813	1842	1726	2910	2813	2805	middle
hsa-miR-383-5p	AGATCAGAAGGTGATTGTGGCT	down	0.241736	-2.0485	0.007527	833.537	201.496	915.102	880.216	705.295	177.485	195.3	231.703	1140	1048	796	169	162	177	middle
hsa-miR-5683	TACAGATGCAGATTCTCTGACTTC	up	4.18738	2.06605	0.00759297	404.741	1694.8	502.503	382.995	328.724	1472.39	1978.31	1633.7	626	456	371	1402	1641	1248	middle
hsa-miR-135a-2-3p	TGTAGGGATGGAAGCCATGAAA	up	3.78295	1.91951	0.00768987	4591.21	17368.3	4941.55	4435.51	4396.58	19380.5	17496.2	15228.3	6156	5281	4962	18454	14513	11633	high
hsa-miR-31-3p	TGCTATGCCAACATATTGCCATC	down	0.672498	-0.572397	0.0078141	128.438	86.3742	135.66	116.746	132.907	89.2676	95.2388	74.6162	169	139	150	85	79	57	middle
hsa-miR-125b-5p	TCCCTGAGACCCTAACTTGTGA	up	7.2391	2.85581	0.00788837	5806.62	42034.7	5582.52	4544.28	7293.07	47971.9	35283.6	42848.7	6954.5	5410.5	8231	45678.5	29267.5	32732.5	high
hsa-miR-758-3p	TTTGTGACCTGGTCCACTAAC	down	0.431194	-1.21359	0.00798794	145.428	62.7075	154.122	121.786	160.375	56.7112	85.5943	45.817	192	145	181	54	71	35	middle
hsa-miR-26b-3p	CCTGTTCTCCATTACTTGGCTC	up	1.75781	0.813775	0.00817106	148.606	261.221	150.912	147.822	147.084	254.15	282.1	247.412	188	176	166	242	234	189	middle
hsa-miR-1180-3p	TTTCCGGCTCGCGTGGGTGTGT	up	1.75141	0.808515	0.00822494	1663.07	2912.72	1679.29	1570.61	1739.31	2679.08	2872.84	3186.24	2092	1870	1963	2551	2383	2434	middle
hsa-miR-152-3p	TCAGTGCATGACAGAACTTGG	up	3.22366	1.6887	0.00831205	1970.14	6351.07	1822.98	1965.37	2122.09	7217.03	6102.52	5733.67	2271	2340	2395	6872	5062	4380	middle
hsa-miR-3176	ACTGGCCTGGGACTACCGGGGG	down	0.166005	-2.5907	0.00837915	49.2754	8.17997	45.7551	61.3127	40.7583	5.25104	19.2889	0	57	73	46	5	16	0	middle
hsa-miR-324-5p	CGCATCCCCTAGGGCATTGGTGT	up	1.48781	0.573195	0.00844142	625.698	930.923	683.918	554.334	638.842	947.287	902.96	942.521	852	660	721	902	749	720	middle
hsa-miR-204-3p	GCTGGGAAGGCAAAGGGACGT	up	16.3861	4.0344	0.0085393	275.365	4512.16	280.952	221.734	323.408	5064.1	3733.6	4738.79	350	264	365	4822	3097	3620	middle
hsa-miR-424-5p	CAGCAGCAATTCATGTTTTGA	up	1.94968	0.963235	0.00858172	1127.82	2198.88	930.353	1377.44	1075.66	2441.73	1875.84	2279.07	1159	1640	1214	2325	1556	1741	middle
hsa-miR-934	TGTCTACTACTGGAGACACTGG	down	0.035264	-4.82566	0.00878049	2025.57	71.4298	1686.52	2051.04	2339.17	45.1589	103.678	65.4528	2101	2442	2640	43	86	50	middle
hsa-miR-3940-3p	CAGCCCGGATCCCAGCCCACTT	down	0.380375	-1.39451	0.0089457	151.874	57.7691	171.782	123.465	160.375	73.5145	42.1944	57.5985	214	147	181	70	35	44	middle
hsa-miR-5699-5p	TGCCCCAACAAGGAAGGACAAG	down	0.562438	-0.830235	0.0090153	146.663	82.489	162.952	134.384	142.654	75.6149	102.472	69.38	203	160	161	72	85	53	middle
hsa-miR-30c-2-3p	CTGGGAGAAGGCTGTTTACTCT	up	4.55705	2.1881	0.00904482	300.628	1369.98	290.585	275.487	335.813	1588.96	1283.92	1237.06	362	328	379	1513	1065	945	middle
hsa-miR-3677-3p	CTCGTGGGCTCTGGCCACGGCC	down	0.637216	-0.650145	0.0090595	70.3126	44.8043	77.0612	62.9925	70.8839	38.8577	45.8111	49.7442	96	75	80	37	38	38	middle
hsa-miR-30a-3p	CTTTCAGTCGGATGTTTGCAGC	up	6.55056	2.71162	0.00918638	2350.27	15395.6	2128.01	2195.08	2727.7	18058.3	14157.4	13970.9	2651	2613.5	3078.5	17195	11743.5	10672.5	high
hsa-miR-99a-5p	AACCCGTAGATCCGATCTTGTG	up	2.11685	1.08192	0.00928214	5080.21	10754.1	4387.67	4536.3	6316.65	8968.77	11922.9	11370.5	5466	5401	7129	8540	9890	8686	high
hsa-miR-490-3p	CAACCTGGAGGACTCCATGCTGT	up	5.98618	2.58164	0.00935719	9.43424	56.4751	14.449	5.8793	7.97444	44.1087	65.0999	60.2166	18	7	9	42	54	46	middle
hsa-miR-148b-3p	TCAGTGCATCACAGAACTTTGT	up	1.45943	0.545402	0.00950704	24540.4	35814.9	21765	26186.8	25669.3	39431.1	34464.4	33549.2	27114	31178.5	28970.5	37546	28588	25628.5	high
hsa-miR-605-5p	TAAATCCCATGGTGCCTTCTCC	up	4.65527	2.21887	0.00955466	3.74725	17.4445	0	5.0394	6.20234	19.9539	19.2889	13.0906	0	6	7	19	16	10	middle
hsa-miR-708-5p	AAGGAGCTTACAATCTAGCTGGG	up	1.74404	0.802431	0.00965722	9252.38	16136.5	8722.36	9695.81	9338.96	17864	15171.9	15373.6	10866	11544	10540	17010	12585	11744	high
hsa-miR-30c-5p	TGTAAACATCCTACACTCTCAGCT	up	2.70889	1.4377	0.00968617	41129.2	111415	29684.2	45681.3	48021.9	132828	101292	100124	36979.5	54389	54197.8	126478	84020.8	76485.8	high
hsa-miR-3615	TCTCTCGGCTCCTCGCGGCTCGC	up	1.61479	0.691344	0.00968874	780.915	1261.01	923.932	672.76	746.053	1183.58	1269.45	1330	1151	801	842	1127	1053	1016	middle
hsa-miR-222-5p	GGCTCAGTAGCCAGTGTAGATCC	down	0.301829	-1.7282	0.010016	256.447	77.403	224.762	296.485	248.094	73.5145	88.0055	70.6891	280	353	280	70	73	54	middle
hsa-mir-5683-p3	AGTCAGGATCTGCATTTGAAT	up	2.80522	1.48812	0.0100556	7.19494	20.1834	10.4354	6.7192	4.43025	16.8033	24.1111	19.6359	13	8	5	16	20	15	middle
hsa-mir-599-p5	TTTGATAAGCTGACATGGGACAG	down	0.0407855	-4.6158	0.0100691	712.829	29.0731	569.129	771.029	798.33	45.1589	13.2611	28.7993	709	918	901	43	11	22	middle
hsa-miR-338-5p	AACAATATCCTGGTGCTGAGT	up	1.60927	0.686406	0.0102058	97.4281	156.788	88.2993	93.2289	110.756	139.678	173.6	157.087	110	111	125	133	144	120	middle
hsa-miR-218-5p	TTGTGCTTGATCTAACCATGTG	up	1.746	0.804051	0.0102089	3478.08	6072.71	2826.78	4074.78	3532.68	6229.31	5780.63	6208.2	3521.5	4851.5	3987	5931.5	4795	4742.5	middle
hsa-miR-30d-3p	CTTTCAGTCAGATGTTTGCTGC	up	1.54384	0.626528	0.0102784	331.549	511.86	309.048	374.596	311.003	554.509	526.827	454.243	385	446	351	528	437	347	middle
hsa-miR-561-3p	CAAAGTTTAAGATCCTTGAAGT	down	0.410243	-1.28545	0.0103543	135.421	55.5554	116.395	142.783	147.084	54.6108	51.8388	60.2166	145	170	166	52	43	46	middle
hsa-miR-1306-5p	CCACCTCCCCTGCAAACGTCCA	down	0.426625	-1.22896	0.0105582	202.009	86.1818	211.918	164.62	229.487	111.322	84.3888	62.8347	264	196	259	106	70	48	middle
hsa-miR-548av-3p	CAAAACTGCAGTTACTTTTGC	up	4.27083	2.09452	0.0106883	1.05731	4.5156	0	1.39983	1.7721	5.60111	4.01851	3.92717	0	1.66667	2	5.33333	3.33333	3	low
hsa-miR-18a-3p	ACTGCCCTAAGTGCTCCTTCTGG	down	0.659603	-0.600329	0.0107975	1236.67	815.711	1329.31	1098.59	1282.11	789.756	730.566	926.812	1656	1308	1447	752	606	708	middle
hsa-miR-19b-1-5p	AGTTTTGCAGGTTTGCATCCAGC	down	0.629283	-0.66822	0.0108264	103.269	64.9852	105.156	113.387	91.2631	74.5647	61.4833	58.9076	131	135	103	71	51	45	middle
hsa-miR-3681-5p	TAGTGGATGATGCACTCTGTGC	up	8.66418	3.11506	0.0108401	2.14059	18.5464	6.42177	0	0	22.0544	20.4944	13.0906	8	0	0	21	17	10	middle
hsa-miR-509-3p	TGATTGGTACGTCTGTGGGTAGA	down	0.522761	-0.935777	0.0110886	32.9313	17.2152	30.5034	31.0763	37.2141	17.8535	18.0833	15.7087	38	37	42	17	15	12	middle
hsa-miR-23b-5p	GGGTTCCTGGCATGCTGATTT	up	1.76846	0.822493	0.0112615	63.3408	112.016	79.4694	52.0738	58.4793	121.824	112.117	102.106	99	62	66	116	93	78	middle
hsa-miR-99b-5p	CACCCGTAGAACCGACCTTGCG	up	1.67584	0.744883	0.0112794	60994.1	102216	56387.1	52440.9	74154.3	94986	104642	107021	70245	62437	83691	90445	86800	81754	high
hsa-miR-550a-5p	AGTGCCTGAGGGAGTAAGAGC	down	0.674466	-0.568182	0.0113974	116.067	78.2834	118.669	106.667	122.865	75.6149	79.1647	80.0706	147.833	127	138.667	72	65.6667	61.1667	middle
hsa-miR-574-3p	CACGCTCATGCACACACCCACA	up	1.67752	0.746333	0.011521	1016.22	1704.73	1037.92	833.181	1177.56	1745.44	1625.09	1743.66	1293	992	1329	1662	1348	1332	middle
hsa-miR-103a-3p	AGCAGCATTGTACAGGGCTATGA	up	1.53512	0.618349	0.0115798	106535	163544	93769.3	104017	121818	176419	169646	144566	116814	123845	137484	167985	140720	110435	high
hsa-miR-1226-3p	TCACCAGCCCTGTGTTCCCTAG	up	1.46226	0.548203	0.0115881	34.3495	50.228	31.3061	32.7561	38.9862	50.41	51.8388	48.4351	39	39	44	48	43	37	middle
hsa-miR-548n	CAAAAGTAATTGTGGATTTTGT	up	4.26207	2.09156	0.0116165	17.6917	75.4034	14.449	22.6773	15.9489	90.3178	63.8944	71.9981	18	27	18	86	53	55	middle
hsa-miR-9-3p	ATAAAGCTAGATAACCGAAAGT	down	0.373876	-1.41937	0.0117403	945.207	353.39	793.623	1016.84	1025.16	317.688	355.438	387.044	988.667	1210.67	1157	302.5	294.833	295.667	middle
hsa-miR-7706	TGAAGCGCCTGTGCTCTGCCGAG	up	1.707	0.771462	0.0117585	278.646	475.649	288.979	220.894	326.066	449.489	477.399	500.06	360	263	368	428	396	382	middle
hsa-miR-363-5p	CGGGTGGATCACGATGCAATTTT	up	1.62626	0.70156	0.0117717	544.517	885.528	480.83	516.539	636.183	906.329	975.293	774.962	599	615	718	863	809	592	middle
hsa-miR-542-3p	TGTGACAGATTGATAACTGAAA	up	1.54229	0.625072	0.0118609	491.768	758.448	435.075	499.741	540.49	766.651	754.677	754.017	542	595	610	730	626	576	middle
hsa-miR-520a-5p	CTCCAGAGGGAAGTACTTTCT	down	0.67014	-0.577465	0.0118776	101.31	67.8917	97.9319	104.988	101.01	66.1631	60.2777	77.2344	122	125	114	63	50	59	middle
hsa-miR-141-3p	TAACACTGTCTGGTAAAGATGGC	down	0.0748182	-3.74047	0.012114	7815.6	584.749	6353.94	9125.94	7966.91	610.17	579.872	564.204	7915.5	10865.5	8991.5	581	481	431	high
hsa-miR-190a-3p	ACTATATATCAAACATATTCCT	up	3.02813	1.59843	0.0123523	8.40754	25.4591	6.42177	12.5985	6.20234	22.0544	22.9055	31.4174	8	15	7	21	19	24	middle
hsa-miR-152-5p	CAGGTTCTGTGATACACTCCGACT	up	4.4018	2.13809	0.0124084	9.80395	43.155	9.63265	10.9187	8.86049	48.3095	45.8111	35.3445	12	13	10	46	38	27	middle
hsa-miR-629-3p	GTTCTCCCAACGTAAGCCCAGC	down	0.409343	-1.28862	0.0124981	85.1888	34.8715	95.5238	70.5516	89.491	47.2593	18.0833	39.2717	119	84	101	45	15	30	middle
hsa-miR-1301-3p	TTGCAGCTGCCTGGGAGTGACTTC	up	1.6103	0.687329	0.0125612	172.288	277.435	167.769	145.303	203.791	293.008	274.866	264.429	209	173	230	279	228	202	middle
hsa-miR-5008-5p	TGAGGCCCTTGGGGCACAGTGG	down	0.232527	-2.10453	0.0125819	22.54	5.24116	17.6599	26.0369	23.9233	5.25104	0	10.4725	22	31	27	5	0	8	middle
hsa-miR-4746-5p	CCGGTCCCAGGAGAACCTGCAGA	down	0.45812	-1.1262	0.0131028	30.0978	13.7884	29.7007	26.0369	34.5559	12.6025	15.6722	13.0906	37	31	39	12	13	10	middle
hsa-miR-200a-3p	TAACACTGTCTGGTAACGATGTT	down	0.188012	-2.4111	0.0131226	32292.7	6071.42	26190	34848.7	35839.4	6438.82	5986.78	5788.65	32626.5	41491.5	40448.5	6131	4966	4422	high
hsa-miR-548b-3p	CAAGAACCTCAGTTGCTTTTGT	down	0.294825	-1.76207	0.0135061	315.535	93.0278	252.857	355.278	338.471	100.82	73.5388	104.725	315	423	382	96	61	80	middle
hsa-miR-502-3p	AATGCACCTGGGCAAGGATTCAG	down	0.715019	-0.483947	0.0139574	4059.83	2902.86	4131.2	3711.52	4336.77	2968.41	2989.17	2750.98	5146.5	4419	4894.5	2826.5	2479.5	2101.5	middle
hsa-miR-3660	ACTGACAGGAGAGCATTTTGA	down	0.139868	-2.83786	0.0140007	31.8853	4.45974	29.7007	25.197	40.7583	7.35145	6.02777	0	37	30	46	7	5	0	middle
hsa-miR-147b-3p	AGTGTGCGGAAATGCTTCTGCT	down	0.0834032	-3.58375	0.0143358	213.089	17.7723	166.163	242.731	230.373	16.8033	16.8778	19.6359	207	289	260	16	14	15	middle
hsa-miR-1915-5p	CACCTTGCCTTGCTGCCCGGGCCT	down	0.357853	-1.48256	0.0143456	96.1377	34.4032	100.34	76.4309	111.642	26.2552	33.7555	43.1989	125	91	126	25	28	33	middle
hsa-miR-92b-5p	AGGGACGGGACGCGGTGCAGTGTT	up	1.7701	0.823827	0.014697	1412.72	2500.64	1386.3	1264.05	1587.8	2124.57	2701.65	2675.71	1727	1505	1792	2023	2241	2044	middle
hsa-miR-597-3p	AGTGGTTCTCTTGTGGCTCAAG	down	0.383355	-1.38325	0.0152903	38.8875	14.9077	30.5034	44.5147	41.6443	13.6527	19.2889	11.7815	38	53	47	13	16	9	middle
hsa-miR-1277-3p	TACGTAGATATATATGTATTTT	up	2.15716	1.10913	0.0153977	81.616	176.059	75.4558	110.027	59.3653	168.033	150.694	209.449	94	131	67	160	125	160	middle
hsa-miR-216a-3p	CACAGTGGTCTCTGGGATTATG	down	0.496524	-1.01006	0.0155465	1934.74	960.644	2142.46	2085.47	1576.28	846.467	1175.42	860.05	2669	2483	1779	806	975	657	middle
hsa-miR-5579-5p	TATGGTACTCCTTAAGCTAAC	up	1.51819	0.602348	0.0156978	22.081	33.5231	23.2789	24.3571	18.607	37.8075	31.3444	31.4174	29	29	21	36	26	24	middle
hsa-miR-561-5p	ATCAAGGATCTTAAACTTTGCC	down	0.719667	-0.474599	0.0157941	1832.11	1318.51	1686.52	1857.86	1951.97	1364.22	1303.2	1288.11	2101	2212	2203	1299	1081	984	middle
hsa-miR-500b-3p	TGCACCCAGGCAAGGATTCTGC	down	0.471333	-1.08518	0.0162429	71.6107	33.7525	78.6666	69.7117	66.4537	35.7071	44.6055	20.9449	98	83	75	34	37	16	middle
hsa-miR-551a	GCGACCCACTCTTGGTTTCCA	down	0.513473	-0.96164	0.0163283	349.48	179.449	411.796	314.123	322.522	192.188	145.872	200.286	513	374	364	183	121	153	middle
hsa-miR-892a	CACTGTGTCCTTTCTGCGTAGA	down	0.290269	-1.78454	0.0170031	39.0769	11.3428	42.5442	43.6748	31.0117	12.6025	9.64443	11.7815	53	52	35	12	8	9	middle
hsa-miR-1843	TATGGAGGTCTCTGTCTGGCTT	up	1.62874	0.703753	0.0170969	118.479	192.971	134.054	99.1082	122.275	200.59	213.383	164.941	167	118	138	191	177	126	middle
hsa-miR-378g	ACTGGGCTTGGAGTCAGAAGGC	up	3.00624	1.58796	0.0176885	6.55699	19.7119	6.42177	8.81895	4.43025	24.1548	15.6722	19.3086	8	10.5	5	23	13	14.75	middle
hsa-miR-125b-2-3p	ACAAGTCAGGCTCTTGGGACCT	up	2.10625	1.07468	0.01775	195.431	411.626	214.326	180.579	191.387	372.824	479.811	382.245	267	215	216	355	398	292	middle
hsa-miR-194-3p	CCAGTGGGGCTGCTGTTATCTG	up	2.0544	1.03871	0.0178703	9.87488	20.2869	8.02721	10.0788	11.5186	16.8033	20.4944	23.563	10	12	13	16	17	18	middle
hsa-miR-204-5p	TTCCCTTTGTCATCCTATGCCT	up	18.0882	4.17698	0.0178945	20181.5	365048	19930.8	17627	22986.8	453406	293697	348040	24829	20987	25943	431730	243620	265871	high
hsa-miR-139-3p	TGGAGACGCGGCCCTGTTGGAGT	up	1.95884	0.970001	0.0181403	92.2038	180.613	119.605	61.3127	95.6933	150.18	195.3	196.359	149	73	108	143	162	150	middle
hsa-miR-942-5p	TTCTCTGTTTTGGCCATGTGTGT	down	0.663425	-0.591994	0.0189204	165.998	110.127	148.503	186.458	163.033	116.573	116.939	96.8702	185	222	184	111	97	74	middle
hsa-miR-25-5p	AGGCGGAGACTTGGGCAATTGCT	down	0.642069	-0.6392	0.018986	701.452	450.38	773.02	603.888	727.446	381.225	473.783	496.133	963	719	821	363	393	379	middle
hsa-miR-30c-1-3p	CTGGGAGAGGGTTGTTTACTCC	up	1.49237	0.577603	0.0190519	161.326	240.758	190.245	136.904	156.831	223.694	245.933	252.648	237	163	177	213	204	193	middle
hsa-miR-200a-5p	CATCTTACCGGACAGTGCTGGA	down	0.0607581	-4.04078	0.0191989	352.967	21.4456	284.163	332.601	442.139	23.1046	22.9055	18.3268	354	396	499	22	19	14	middle
hsa-miR-26b-5p	TTCAAGTAATTCAGGATAGGTT	up	1.75649	0.812696	0.019917	22029.5	38694.5	16814.3	27054.6	22219.5	44085.3	32764.1	39234.2	20946.7	32211.7	25077	41977.7	27177.7	29971.3	high
hsa-miR-3912-3p	TAACGCATAATATGGACATGT	up	1.96452	0.974175	0.020034	29.9158	58.7701	34.517	26.8768	28.3536	58.8116	49.4277	68.071	43	32	32	56	41	52	middle
hsa-miR-3663-3p	TGAGCACCACACAGGCCGGGCGC	up	5.96922	2.57754	0.0201597	2.14059	12.7777	6.42177	0	0	14.7029	14.4666	9.1634	8	0	0	14	12	7	middle
hsa-miR-625-3p	GACTATAGAACTTTCCCCCTCA	down	0.684474	-0.546933	0.0208997	1224.01	837.804	1366.23	1091.03	1214.77	725.693	843.888	943.83	1702	1299	1371	691	700	721	middle
hsa-miR-203a-3p	GTGAAATGTTTAGGACCACTAG	down	0.236668	-2.07906	0.0209361	529.482	125.311	398.15	574.492	615.804	119.724	156.722	99.4883	496	684	695	114	130	76	middle
hsa-miR-135a-5p	TATGGCTTTTTATTCCTATGTGA	up	5.0191	2.32743	0.0210608	23126.5	116074	20646.5	29444.5	19288.4	144919	94795.1	108508	25720.7	35057.2	21769	137991	78632	82890.5	high
hsa-miR-4474-3p	TTGTGGCTGGTCATGAGGCTAA	up	7.15007	2.83796	0.0211793	2.9535	21.1177	0	0	8.86049	28.3556	19.2889	15.7087	0	0	10	27	16	12	middle
hsa-miR-4326	TGTTCCTCTGTCTCCCAGACTCTG	down	0.615507	-0.700153	0.0212468	161.422	99.3563	160.544	139.423	184.298	84.0166	98.8554	115.197	200	166	208	80	82	88	middle
hsa-miR-148a-3p	TCAGTGCACTACAGAACTTTGT	up	1.82334	0.866583	0.0214732	41204.4	75129.6	37294.4	42155	44163.8	87121	70663.6	67604.3	46460	50190.5	49843.5	82956	58615	51643.5	high
hsa-miR-30b-3p	CTGGGAGGTGGATGTTTACTTC	up	1.44412	0.530189	0.0219175	107.281	154.927	98.7347	99.9481	123.161	145.979	174.805	143.996	123	119	139	139	145	110	middle
hsa-miR-3187-3p	TTGGCCATGGGGCTGCGCGGGGC	down	0.466456	-1.10019	0.022125	136.77	63.7972	127.633	128.505	154.173	63.0124	90.4166	37.9627	159	153	174	60	75	29	middle
hsa-miR-675-5p	TGGTGCGGAGAGGGCCCACAGTG	down	0.0151238	-6.04703	0.02214	444.034	6.7155	393.333	362.837	575.932	10.5021	9.64443	0	490	432	650	10	8	0	middle
hsa-miR-450b-5p	TTTTGCAATATGTTCCTGAAT	up	1.82431	0.86735	0.0223826	212.197	387.113	162.952	281.367	192.273	413.782	395.422	352.136	203	335	217	394	328	269	middle
hsa-miR-205-5p	TCCTTCATTCCACCGGAGTCTG	down	0.0765104	-3.7082	0.0224543	63367.6	4848.28	50601.9	58866.1	80634.9	4134.67	5513	4897.18	63038	70087	91005	3937	4573	3741	high
hsa-miR-589-5p	TGAGAACCACGTCTGCTCTGA	down	0.647032	-0.628092	0.0224572	544.984	352.622	550.666	472.024	612.26	356.02	394.216	307.628	686	562	691	339	327	235	middle
hsa-miR-3117-3p	ATAGGACTCATATAGTGCCAGG	down	0.541058	-0.886144	0.0226924	495.55	268.121	488.857	578.691	419.101	200.59	347.2	256.575	609	689	473	191	288	196	middle
hsa-miR-199a-5p	CCCAGTGTTCAGACTACCTGTTC	up	2.09347	1.0659	0.0227506	63.2937	132.503	88.7006	53.3337	47.8467	159.106	127.789	110.615	110.5	63.5	54	151.5	106	84.5	middle
hsa-miR-370-3p	GCCTGCTGGGGTGGAACCTGGT	down	0.438153	-1.19049	0.0227951	195.686	85.7406	239.211	167.98	179.868	65.1129	95.2388	96.8702	298	200	203	62	79	74	middle
hsa-miR-3085-3p	TCTGGCTGCTATGGCCCCCTCT	down	0.573959	-0.80098	0.0231344	28.4646	16.3375	25.6871	26.0369	33.6699	12.6025	18.0833	18.3268	32	31	38	12	15	14	middle
hsa-miR-3138	ACAGTGAGGTAGAGGGAGTGC	down	0.147979	-2.75654	0.0233914	14.7438	2.18176	20.068	11.7586	12.4047	0	0	6.54528	25	14	14	0	0	5	middle
hsa-miR-504-3p	GGGAGTGCAGGGCAGGGTTTCC	up	4.34014	2.11774	0.023491	3.70067	16.0614	4.0136	0	7.08839	16.8033	15.6722	15.7087	5	0	8	16	13	12	middle
hsa-miR-30a-5p	TGTAAACATCCTCGACTGGAAGCT	up	6.89746	2.78606	0.0235003	41609.9	287003	38286.2	37596.9	48946.7	364641	254521	241846	47695.5	44763.5	55241.5	347208	211124	184748	high
hsa-miR-134-5p	TGTGACTGGTTGACCAGAGGGG	down	0.415779	-1.26611	0.0237579	104.571	43.4782	101.143	98.2683	114.3	31.5062	67.511	31.4174	126	117	129	30	56	24	middle
hsa-miR-92a-3p	TATTGCACTTGTCCCGGCCTGT	up	1.47387	0.559611	0.023795	284363	419115	262847	262086	328156	424360	414442	418543	327445	312044	370359	404072	343777	319729	high
hsa-miR-217-3p	TATCAGTTCCTAATGCATTGCC	down	0.138053	-2.85671	0.0238395	960.582	132.611	1073.24	1111.19	697.321	110.272	142.255	145.305	1337	1323	787	105	118	111	middle
hsa-miR-1273h-3p	CTGCAGACTCGACCTCCCAGGC	down	0.178345	-2.48726	0.0241989	14.68	2.61811	12.0408	14.2783	17.721	0	0	7.85434	15	17	20	0	0	6	middle
hsa-miR-216b-3p	ACACACTTACCCGTAGAGATTCT	down	0.484969	-1.04403	0.0245503	1700.54	824.71	1563.7	2049.36	1488.56	715.191	965.649	793.288	1948	2440	1680	681	801	606	middle
hsa-miR-2682-5p	CAGGCAGTGACTGTTCAGACGTC	down	0.356284	-1.4889	0.0247084	111.397	39.6889	134.857	113.387	85.9468	35.7071	50.6333	32.7264	168	135	97	34	42	25	middle
hsa-miR-543	AAACATTCGCGGTGCACTTCTT	down	0.422593	-1.24266	0.0247309	77.2212	32.6332	89.102	82.3102	60.2513	36.7573	34.9611	26.1811	111	98	68	35	29	20	middle
hsa-miR-203b-3p	TTGAACTGTTAAGAACCACTGG	down	0.161559	-2.62986	0.0249788	21.6681	3.50069	28.8979	20.1576	15.9489	10.5021	0	0	36	24	18	10	0	0	middle
hsa-miR-30e-5p	TGTAAACATCCTTGACTGGAAGCT	up	1.71472	0.777974	0.025627	85901.4	147297	83216.5	85202.4	89285.4	165970	146527	129394	103668	101444	100768	158036	121543	98845.5	high
hsa-miR-935	CAGTTACCGCTTCCGCTACCGC	up	1.66053	0.731642	0.0256766	226.475	376.068	279.347	168.82	231.259	338.167	358.05	431.989	348	201	261	322	297	330	middle
hsa-miR-423-3p	AGCTCGGTCTGAGGCCCCTCAGT	up	1.33119	0.41272	0.0258825	43489.9	57893.5	43719.4	38285.2	48465.1	55638.9	59817.2	58224.2	54464	45583	54698	52979	49618	44478	high
hsa-miR-215-5p	ATGACCTATGAATTGACAGACA	up	1.73813	0.797532	0.0259074	26.5688	46.1799	31.7075	21.4175	26.5815	54.6108	44.0027	39.9262	39.5	25.5	30	52	36.5	30.5	middle
hsa-mir-641-p3	TGACTGTCCTATGTCTTTCCT	down	0.606157	-0.722236	0.0261189	71.8287	43.5395	82.6802	66.3521	66.4537	53.5606	32.55	44.5079	103	79	75	51	27	34	middle
hsa-miR-301a-3p	CAGTGCAATAGTATTGTCAAAGC	up	1.90228	0.927726	0.026604	2359.2	4487.85	2175.37	2569.26	2332.97	5249.99	3881.88	4331.67	2710	3059	2633	4999	3220	3309	middle
hsa-miR-506-3p	GTAAGGCACCCTTCTGAGTAGA	down	0.612481	-0.707264	0.0266216	36.9183	22.6117	32.1088	36.1157	42.5304	17.8535	27.7277	22.254	40	43	48	17	23	17	middle
hsa-miR-3679-5p	TGAGGATATGGCAGGGAAGGG	down	0.190182	-2.39455	0.0268047	90.9996	17.3065	102.748	62.1526	108.098	19.9539	24.1111	7.85434	128	74	122	19	20	6	middle
hsa-miR-1179	AAGCATTCTTTCATTGGTTGGT	down	0.434242	-1.20343	0.0271792	79.1408	34.3663	90.7075	87.3496	59.3653	40.9581	38.5777	23.563	113	104	67	39	32	18	middle
hsa-miR-429	TAATACTGTCTGGTAAAACCGT	down	0.200099	-2.32122	0.0272932	5943.88	1189.36	4348.34	6977.05	6506.26	1295.96	1163.36	1108.77	5417	8307	7343	1234	965	847	middle
hsa-miR-3064-5p	TCTGGCTGTTGTGGTGTGCAAA	up	1.8182	0.862509	0.0274372	11.0533	20.0971	7.22449	11.7586	14.1768	19.9539	18.0833	22.254	9	14	16	19	15	17	middle
hsa-miR-27b-5p	AGAGCTTAGCTGATTGGTGAACA	up	1.62195	0.697731	0.0282905	221.526	359.305	182.218	203.256	279.106	347.619	413.505	316.792	227	242	315	331	343	242	middle
hsa-miR-4783-3p	CCCCGGTGTTGGGGCGCGTCTGT	up	5.50403	2.46049	0.0284346	1.47675	8.12806	0	0	4.43025	10.5021	6.02777	7.85434	0	0	5	10	5	6	middle
hsa-miR-1912-5p	CTCATTGCATGGGCTGTGTAT	down	0.186886	-2.41977	0.0290767	12.9015	2.41111	14.449	10.0788	14.1768	0	7.23332	0	18	12	16	0	6	0	middle
hsa-miR-1255a	AGGATGAGCAAAGAAAGTAGATT	down	0.256396	-1.96356	0.029241	54.6045	14.0004	40.9388	69.7117	53.163	17.8535	8.43888	15.7087	51	83	60	17	7	12	middle
hsa-miR-30e-3p	CTTTCAGTCGGATGTTTACAGT	up	1.74411	0.802487	0.0300305	4108.04	7164.86	4300.18	3888.32	4135.63	7039.54	8228.51	6226.53	5357	4629.5	4667.5	6703	6825.5	4756.5	high
hsa-miR-34a-5p	TGGCAGTGTCTTAGCTGGTTGT	up	1.52533	0.609123	0.0300318	5717.61	8721.25	5534.76	5656.73	5961.34	9870.9	8077.21	8215.64	6895	6735	6728	9399	6700	6276	high
hsa-miR-132-5p	ACCGTGGCTTTCGATTGTTACT	up	1.42236	0.508282	0.0301332	163.05	231.915	182.218	138.584	168.349	236.297	229.055	230.394	227	165	190	225	190	176	middle
hsa-miR-525-5p	CTCCAGAGGGATGCACTTTCT	up	1.34582	0.428485	0.030345	72.43	97.4777	69.8367	73.9112	73.5421	93.4685	91.6221	107.343	87	88	83	89	76	82	middle
hsa-miR-200c-3p	TAATACTGCCGGGTAATGATGGA	down	0.0897952	-3.47722	0.0303469	37398.8	3358.23	27414.1	36354.2	48427.9	2877.04	3745.66	3451.98	34151.5	43284	54656	2739.5	3107	2637	high
hsa-miR-208b-3p	ATAAGACGAACAAAAGGTTTGT	up	7.4983	2.90656	0.0304154	1.60544	12.0381	4.81632	0	0	7.35145	15.6722	13.0906	6	0	0	7	13	10	middle
hsa-miR-335-5p	TCAAGAGCAATAACGAAAAATGT	up	2.39155	1.25795	0.0305559	11753.4	28108.9	10555.8	13117.6	11586.9	33735.8	22690.9	27899.9	13150	15618	13077	32123	18822	21313	high
hsa-miR-675-3p	CTGTATGCCCTCACCGCTCAGC	down	0.0544699	-4.1984	0.0307055	333.341	18.1571	292.993	258.689	448.341	11.5523	33.7555	9.1634	365	308	506	11	28	7	middle
hsa-miR-363-3p	AATTGCACGGTATCCATCTGTA	up	1.54768	0.630112	0.0308239	192043	297222	170380	197744	208004	344698	270936	276032	212253	235438	234755	328219	224740	210863	high
hsa-miR-27a-5p	AGGGCTTAGCTGCTTGTGAGCA	down	0.217142	-2.20329	0.0310168	760.406	165.116	644.585	659.322	977.312	157.531	182.039	155.778	803	785	1103	150	151	119	middle
hsa-miR-216b-5p	AAATCTCTGCAGGCAAATGTGA	down	0.435775	-1.19834	0.0311047	22047.3	9607.65	21921.5	26280.5	17939.8	8670.51	10373.8	9778.66	27309	31290	20247	8256	8605	7470	high
hsa-miR-654-3p	TATGTCTGCTGACCATCACC	down	0.555664	-0.847716	0.0311152	250.477	139.181	211.116	261.209	279.106	136.527	142.255	138.76	263	311	315	130	118	106	middle
hsa-miR-520a-3p	AAAGTGCTTCCCTTTGGACT	down	0.495312	-1.01359	0.0313344	45.9303	22.7498	53.7823	35.2758	48.7327	15.7531	28.9333	23.563	67	42	55	15	24	18	middle
hsa-miR-142-3p	TGTAGTGTTTCCTACTTTATGG	down	0.256587	-1.96248	0.0313741	17.381	4.45974	14.449	23.5172	14.1768	7.35145	6.02777	0	18	28	16	7	5	0	middle
hsa-miR-200b-3p	TAATACTGCCTGGTAATGATGAC	down	0.165927	-2.59138	0.0314429	32361.8	5369.72	23912.7	32182.5	40990.4	5606.53	5686.6	4816.02	29789.5	38317	46262	5338.5	4717	3679	high
hsa-miR-1304-3p	TCTCACTGTAGCATCGAACCCC	down	0.660946	-0.597396	0.0316413	315.188	208.322	330.721	275.487	339.357	213.192	204.944	206.831	412	328	383	203	170	158	middle
hsa-miR-382-5p	GAAGTTGTTCGTGGTGGATTCG	down	0.621772	-0.685543	0.0316874	112.847	70.1648	128.435	110.867	99.2375	66.1631	72.3332	71.9981	160	132	112	63	60	55	middle
hsa-miR-200b-5p	CATCTTACTGGGCAGCATTGGA	down	0.0846875	-3.56171	0.0328848	451.242	38.2145	316.272	453.546	583.906	32.5564	34.9611	47.126	394	540	659	31	29	36	middle
hsa-miR-137-5p	ACGGGTATTCTTGGGTGGATAAT	down	0.412247	-1.27842	0.0331044	47.6319	19.6361	51.3741	43.6748	47.8467	30.456	19.2889	9.1634	64	52	54	29	16	7	middle
hsa-miR-3928-3p	GGAGGAACCTTGGAGCTTCGGC	up	1.67825	0.746959	0.0336314	29.867	50.1243	30.5034	20.9975	38.1001	54.6108	43.3999	52.3623	38	25	43	52	36	40	middle
hsa-miR-33b-3p	CAGTGCCTCGGCAGTGCAGCC	down	0.241937	-2.0473	0.0338264	33.0761	8.00234	28.0952	27.7167	43.4164	6.30124	7.23332	10.4725	35	33	49	6	6	8	middle
hsa-mir-5699-p3	TGTCTTTCCTTGTTGGAGCAGG	down	0.470752	-1.08696	0.0339129	32.6941	15.3908	32.9116	39.4753	25.6954	9.45187	14.4666	22.254	41	47	29	9	12	17	middle
hsa-miR-191-5p	CAACGGAATCCCAAAAGCAGCTG	up	1.34002	0.422257	0.034235	68074.1	91220.9	60888	64680.7	78653.7	95096.3	91798.1	86768.2	75852	77010	88769	90550	76146	66283	high
hsa-mir-1843-p3	TCTGATCGTTCCCCTCCATACA	up	1.79725	0.845794	0.0344319	148.778	267.391	155.728	129.345	161.261	251	319.472	231.703	194	154	182	239	265	177	middle
hsa-mir-941-1-p5	ACATGTGCCCAGGGCCCGGGACAGCG	down	0.244902	-2.02972	0.034559	8.74262	2.14109	8.82993	5.8793	11.5186	3.15062	0	3.27264	11	7	13	3	0	2.5	middle
hsa-mir-941-3-p5	ACATGTGCCCAGGGCCCGGGACAGCG	down	0.244902	-2.02972	0.034559	8.74262	2.14109	8.82993	5.8793	11.5186	3.15062	0	3.27264	11	7	13	3	0	2.5	middle
hsa-miR-888-5p	TACTCAAAAAGCTGTCAGTCAC	down	0.470793	-1.08684	0.0346152	66.697	31.4004	82.6802	56.2733	61.1374	27.3054	28.9333	37.9627	103	67	69	26	24	29	middle
hsa-miR-483-3p	CACTCCTCTCCTCCCGTCTTCT	down	0.205393	-2.28354	0.0349949	238.124	48.909	239.211	173.019	302.143	39.9079	51.8388	54.9804	298	206	341	38	43	42	middle
hsa-miR-1260a	ATCCCACCGCTGCCACCA	down	0.621258	-0.686735	0.0350731	9256.65	5750.77	10293.3	9888.99	7587.68	4324.75	6350.86	6576.7	12823	11774	8563.5	4118	5268	5024	high
hsa-miR-1260b	ATCCCACCGCTGCCACCA	down	0.621258	-0.686735	0.0350731	9256.65	5750.77	10293.3	9888.99	7587.68	4324.75	6350.86	6576.7	12823	11774	8563.5	4118	5268	5024	high
hsa-miR-411-3p	TATGTAACACGGTCCACTAAC	down	0.323983	-1.62601	0.0353113	38.1835	12.3708	25.6871	43.6748	45.1885	11.5523	7.23332	18.3268	32	52	51	11	6	14	middle
hsa-miR-154-3p	AATCATACACGGTTGACCTATT	down	0.241651	-2.049	0.0355408	29.2896	7.07785	21.6735	36.9556	29.2396	7.35145	6.02777	7.85434	27	44	33	7	5	6	middle
hsa-miR-143-3p	TGAGATGAAGCACTGTAGCTCT	down	0.529242	-0.918001	0.0357026	1560.32	825.786	1314.86	1531.98	1834.12	837.015	867.999	772.344	1638	1824	2070	797	720	590	middle
hsa-miR-146b-5p	TGAGAACTGAATTCCATAGGCTGT	up	1.36231	0.446058	0.0357298	2443.95	3329.43	2182.6	2346.68	2802.57	3572.81	3509.37	2906.11	2719	2794	3163	3402	2911	2220	middle
hsa-miR-96-3p	CAATCATGTGCAGTGCCAATAT	down	0.179194	-2.48041	0.0358748	11.2128	2.00926	12.0408	10.0788	11.5186	0	6.02777	0	15	12	13	0	5	0	middle
hsa-miR-381-3p	TATACAAGGGCAAGCTCTCTGT	down	0.59485	-0.749403	0.0359632	286.039	170.15	261.687	288.086	308.345	150.18	225.439	134.833	326	343	348	143	187	103	middle
hsa-miR-1908-5p	CGGCGGGGACGGCGATTGGTC	down	0.669996	-0.577776	0.0365657	112.301	75.2409	113.184	104.988	118.731	57.7614	86.7999	81.1615	141	125	134	55	72	62	middle
hsa-miR-29c-5p	ACCGATTTCTCCTGGTGTTCAGA	up	2.05635	1.04009	0.0365815	60.4265	124.258	58.5986	57.1132	65.5676	150.18	106.089	116.506	73	68	74	143	88	89	middle
hsa-miR-508-5p	TACTCCAGAGGGCGTCACTCATG	down	0.190348	-2.39329	0.0368611	11.462	2.18176	12.0408	12.5985	9.74654	0	0	6.54528	15	15	11	0	0	5	middle
hsa-miR-151b	TCGAGGAGCTCACAGTCTAG	up	1.33723	0.419246	0.0375119	458.606	613.26	426.245	456.486	493.086	580.765	689.577	569.44	531	543.5	556.5	553	572	435	middle
hsa-miR-499a-5p	TTAAGACTTGCAGTGATGTTT	up	1.75296	0.809796	0.0375461	238.853	418.7	218.34	285.566	212.652	486.246	333.938	435.916	272	340	240	463	277	333	middle
hsa-miR-217-5p	TACTGCATCAGGAACTGATTGGA	down	0.457417	-1.12842	0.037757	23715.3	10847.8	22726.6	29376.4	19043	9624.1	13139.3	9779.96	28312	34976	21492	9164	10899	7471	high
hsa-miR-625-5p	AGGGGGAAAGTTCTATAGTCCT	down	0.640914	-0.641798	0.0379007	145.98	93.5604	170.177	141.943	125.819	106.071	85.5943	89.0159	212	169	142	101	71	68	middle
hsa-miR-1275	GTGGGGGAGAGGCTGTCG	down	0.735322	-0.443551	0.0381782	49.7369	36.5727	44.9524	53.7536	50.5048	30.456	37.3722	41.8898	56	64	57	29	31	32	middle
hsa-miR-219a-5p	TGATTGTCCAAACGCAATTCTCG	up	2.41817	1.27391	0.0384486	1428.67	3454.76	1566.11	1440.01	1279.9	4243.36	2754.69	3366.24	1951	1714.5	1444.5	4040.5	2285	2571.5	middle
hsa-miR-219a-5p	TGATTGTCCAAACGCAATTCTTG	up	2.41817	1.27391	0.0384486	1428.67	3454.76	1566.11	1440.01	1279.9	4243.36	2754.69	3366.24	1951	1714.5	1444.5	4040.5	2285	2571.5	middle
hsa-miR-27a-3p	TTCACAGTGGCTAAGTTCCGC	down	0.452288	-1.14469	0.0385892	7107.5	3214.64	5570.48	8331.81	7420.22	3149.05	3057.29	3437.58	6939.5	9920	8374.5	2998.5	2536	2626	high
hsa-miR-1286	TGCAGGACCAAGATGAGCCCT	down	0.218213	-2.19619	0.0391132	38.2541	8.34754	27.2925	52.9137	34.5559	0	13.2611	11.7815	34	63	39	0	11	9	middle
hsa-miR-1277-5p	TATATATATATATGTACGTATG	up	2.28562	1.19258	0.0392751	169.652	387.761	126.027	271.288	111.642	372.824	307.416	483.042	157	323	126	355	255	369	middle
hsa-miR-3200-3p	CACCTTGCGCTACTCAGGTCTGC	up	1.41704	0.502879	0.0395216	310.802	440.418	354	245.251	333.155	421.133	478.605	421.516	441	292	376	401	397	322	middle
hsa-miR-9903	TTGTCCTCCAGTAGACTAGGGA	up	2.1745	1.12069	0.0400781	13.9415	30.3158	13.6463	19.3177	8.86049	22.0544	36.1666	32.7264	17	23	10	21	30	25	middle
hsa-miR-140-5p	CAGTGGTTTTACCCTATGGTAG	up	1.41554	0.501353	0.0401155	4312.42	6104.4	3552.84	5139.35	4245.06	6812.7	5865.02	5635.49	4426	6119	4791	6487	4865	4305	middle
hsa-miR-487a-3p	AATCATACAGGGACATCCAGTT	down	0.471015	-1.08615	0.0405158	76.9086	36.2251	77.8639	72.2314	80.6305	49.3597	40.9888	18.3268	97	86	91	47	34	14	middle
hsa-miR-371a-3p	AGTGCCGCCATCTTTTGAGTGT	down	0.0964826	-3.37359	0.0410331	58.053	5.60111	72.2449	31.9162	69.9979	16.8033	0	0	90	38	79	16	0	0	middle
hsa-miR-23a-3p	ATCACATTGCCAGGGATTTCCA	down	0.525522	-0.928176	0.0418432	13447.6	7067.03	11566	12679.1	16097.7	7259.56	7089.26	6852.26	14408.5	15096	18168	6912.5	5880.5	5234.5	high
hsa-miR-302b-5p	ACTTTAACATGGAAGTGCTTTCT	down	0.713305	-0.487409	0.042183	2640.95	1883.81	2587.17	2904.38	2431.32	2234.84	1540.7	1875.88	3223	3458	2744	2128	1278	1433	middle
hsa-miR-1249-3p	ACGCCCTTCCCCCCCTTCTTCA	down	0.506195	-0.982234	0.0428142	260.217	131.721	321.088	215.014	244.55	109.222	145.872	140.069	400	256	276	104	121	107	middle
hsa-miR-378a-3p	ACTGGACTTGGAGTCAGAAGGC	up	1.64654	0.719434	0.0432837	21719.4	35761.7	23542.1	18975.4	22640.6	42773.8	32994.2	31517.1	29327.9	22592.4	25552.2	40728.9	27368.5	24076.2	high
hsa-miR-301b-3p	CAGTGCAATGATATTGTCAAAGC	up	2.20638	1.14168	0.0433493	421.272	929.484	410.993	443.467	409.355	1126.87	742.621	918.958	512	528	462	1073	616	702	middle
hsa-miR-1224-5p	GTGAGGACTCGGGAGGTGGAG	down	0.249146	-2.00494	0.0433744	75.2512	18.7485	97.9319	76.4309	51.3909	16.8033	13.2611	26.1811	122	91	58	16	11	20	middle
hsa-miR-7-1-3p	CAACAAATCACAGTCTGCCATA	down	0.629206	-0.668395	0.0436555	1366.16	859.599	1536.41	1458.07	1104.02	762.451	830.627	985.72	1914	1736	1246	726	689	753	middle
hsa-miR-99a-3p	CAAGCTCGCTTCTATGGGTCTGT	up	2.11288	1.07921	0.0441442	10.7917	22.8015	8.02721	8.399	15.9489	16.8033	24.1111	27.4902	10	10	18	16	20	21	middle
hsa-miR-126-5p	CATTATTACTTTTGGTACGCG	up	1.44977	0.535827	0.044893	399.622	579.361	354.803	457.746	386.317	650.078	485.838	602.166	442	545	436	619	403	460	middle
hsa-miR-187-3p	TCGTGTCTTGTGTTGCAGCCGGA	down	0.545793	-0.873574	0.0449596	801.786	437.609	725.66	697.957	981.743	412.731	402.655	497.442	904	831	1108	393	334	380	middle
hsa-miR-21-3p	CAACACCAGTCGATGGGCTGTC	down	0.450861	-1.14925	0.0450085	6867.92	3096.48	5175.94	7596.9	7830.9	2901.72	3283.93	3103.77	6448	9045	8838	2763	2724	2371	high
hsa-miR-379-3p	TATGTAACATGGTCCACTAAC	down	0.215093	-2.21697	0.0461073	21.1578	4.5509	25.6871	21.8374	15.9489	13.6527	0	0	32	26	18	13	0	0	middle
hsa-miR-145-3p	ATTCCTGGAAATACTGTTCTT	down	0.314995	-1.6666	0.0464717	60.0837	18.9261	42.5442	73.9112	63.7955	17.8535	19.2889	19.6359	53	88	72	17	16	15	middle
hsa-miR-197-5p	CGGGTAGAGAGGGCAGTGGGAGG	down	0.491936	-1.02346	0.0465651	33.887	16.6703	40.136	25.197	36.328	16.8033	9.64443	23.563	50	30	41	16	8	18	middle
hsa-miR-320c	AAAAGCTGGGTTGAGAGG	up	1.35619	0.439556	0.0469384	79.3174	107.569	84.9393	70.8636	82.1494	92.4258	117.946	112.336	105.814	84.3714	92.7143	88.0071	97.8357	85.8143	middle
hsa-miR-320d	AAAAGCTGGGTTGAGAGG	up	1.35619	0.439556	0.0469384	79.3174	107.569	84.9393	70.8636	82.1494	92.4258	117.946	112.336	105.814	84.3714	92.7143	88.0071	97.8357	85.8143	middle
hsa-miR-877-3p	TCCTCTTCTCCCTCCTCCCAG	down	0.751596	-0.411971	0.0473343	39.9514	30.0273	36.1224	40.3152	43.4164	34.6568	25.3166	30.1083	45	48	49	33	21	23	middle
hsa-miR-2277-3p	TGACAGCGCCCTGCCTGGCTCG	down	0.61918	-0.691569	0.0473706	75.1237	46.5151	82.6802	63.8324	78.8584	43.0585	34.9611	61.5257	103	76	89	41	29	47	middle
hsa-miR-579-5p	TCGCGGTTTGTGCCAGATGAC	down	0.211428	-2.24176	0.0477475	16.5107	3.49082	21.6735	16.3399	11.5186	0	0	10.4725	27	19.4545	13	0	0	8	middle
hsa-miR-24-2-5p	GTGCCTACTGAGCTGAAACACAGT	down	0.483519	-1.04835	0.0483968	241.472	116.756	179.809	263.729	280.878	134.427	108.5	107.343	224	314	317	128	90	82	middle
hsa-miR-378d	ACTGGACTTGGAGTCAGAA	down	0.704332	-0.505672	0.0494694	47.2657	33.2908	51.7086	45.5646	44.524	25.4675	36.7694	37.6354	64.4167	54.25	50.25	24.25	30.5	28.75	middle
hsa-mir-449a-p3	CGGCTAACATGCAACTGCTGTC	up	14.3819	3.84618	0.0496396	1.47675	21.2384	0	0	4.43025	29.4058	12.0555	22.254	0	0	5	28	10	17	middle
hsa-miR-148b-5p	GAAGTTCTGTTATACACTCAGGC	up	1.62671	0.701961	0.0499358	215.579	350.686	210.313	200.736	235.689	410.631	350.816	290.611	262	239	266	391	291	222	middle
Following miRNAs do not show significant difference (p-value<0.05).
hsa-miR-30b-5p	TGTAAACATCCTACACTCAGCT	up	1.58771	0.666952	0.0509781	13095.4	20791.7	13351.7	13312.4	12622.1	24028.4	17629.2	20717.6	16633	15850	14245.3	22879.7	14623.3	15826.3	high
hsa-miR-3127-5p	ATCAGGGCTTGTGGAATGGGAAG	down	0.358541	-1.47979	0.051001	10.967	3.93211	8.82993	13.4384	10.6326	5.25104	0	6.54528	11	16	12	5	0	5	middle
hsa-miR-375-3p	TTTGTTCGTTCGGCTCGCGTGA	down	0.51366	-0.961113	0.0511361	7200.58	3698.66	6445.05	6128.75	9027.96	3504.54	4282.13	3309.3	8029	7297	10189	3337	3552	2528	high
hsa-miR-31-5p	AGGCAAGATGCTGGCATAGCTG	down	0.648128	-0.62565	0.0516005	4825.26	3127.38	4028.86	4798.35	5648.56	2726.34	3347.82	3307.99	5019	5713	6375	2596	2777	2527	middle
hsa-miR-18a-5p	TAAGGTGCATCTAGTGCAGATAG	down	0.528359	-0.920411	0.0521088	20437	10798.1	16205.3	24204.2	20901.5	11250.3	10520.9	10623	20188	28818	23589.5	10712.5	8727	8115	high
hsa-miR-12136	GAAAAAGTCATGGAGGCCATGGGGTT	up	1.37053	0.454731	0.052815	1146.05	1570.69	1359.81	941.528	1136.8	1672.98	1576.86	1462.22	1694	1121	1283	1593	1308	1117	middle
hsa-miR-432-5p	TCTTGGAGTAGGTCATTGGGTGG	down	0.496407	-1.0104	0.0530882	83.6369	41.518	107.565	68.0319	75.3142	57.7614	30.1389	36.6536	134	81	85	55	25	28	middle
hsa-miR-19a-3p	TGTGCAAATCTATGCAAAACTGA	down	0.64175	-0.639916	0.0545667	15183.3	9743.86	12044.2	17172	16333.6	11843	8473.24	8915.33	15004.2	20445.3	18434.2	11276.8	7028.5	6810.5	high
hsa-miR-4677-3p	TCTGTGAGACCAAAGAACTACT	down	0.555892	-0.847124	0.054949	39.1995	21.7907	46.5578	29.3965	41.6443	21.0041	16.8778	27.4902	58	35	47	20	14	21	middle
hsa-miR-590-5p	GAGCTTATTCATAAAAGTGCAG	down	0.667611	-0.582919	0.0553943	84.9803	56.7338	89.102	94.0688	71.77	45.1589	53.0444	71.9981	111	112	81	43	44	55	middle
hsa-miR-3677-5p	CAGTGGCCAGAGCCCTGCAGTGT	down	0.205305	-2.28416	0.0554504	23.488	4.82222	13.6463	30.2364	26.5815	0	14.4666	0	17	36	30	0	12	0	middle
hsa-miR-26a-2-3p	CCTATTCTTGATTACTTGTTTC	up	1.93272	0.950631	0.0557953	45.7645	88.4498	50.5714	50.394	36.328	112.372	78.361	74.6162	63	60	41	107	65	57	middle
hsa-miR-514a-5p	TACTCTGGAGAGTGACAATCATG	down	0.333779	-1.58303	0.0559175	14.2588	4.75929	9.63265	17.6379	15.5059	0	9.04166	5.23623	12	21	17.5	0	7.5	4	middle
hsa-miR-4662a-5p	TTAGCCAATTGTCCATCTTTAG	up	3.45308	1.78788	0.0560495	16.003	55.2595	12.0408	22.6773	13.2907	76.6651	44.6055	44.5079	15	27	15	73	37	34	middle
hsa-miR-585-3p	TGGGCGTATCTGTATGCTAGGG	down	0.623641	-0.681213	0.0565304	363.141	226.47	343.565	309.923	435.936	210.041	250.755	218.613	428	369	492	200	208	167	middle
hsa-miR-342-5p	AGGGGTGCTATCTGTGATTGAGG	up	1.35079	0.433801	0.0565605	386.228	521.712	402.163	357.798	398.722	500.949	595.544	468.642	501	426	450	477	494	358	middle
hsa-miR-221-3p	AGCTACATTGTCTGCTGGGTTTC	down	0.594224	-0.750921	0.0568347	113663	67541.2	92583.4	112684	135721	73076.6	68414	61133	115337	134164	153175	69583	56749	46700	high
hsa-miR-320b	AAAAGCTGGGTTGAGAGGGC	up	1.2924	0.370049	0.0571134	428.004	553.151	444.826	391.985	447.202	480.127	595.948	583.378	554.148	466.705	504.714	457.174	494.336	445.648	middle
hsa-miR-1258	AGTTAGGATTAGGTCGTGGAA	down	0.371656	-1.42796	0.057283	12.139	4.51152	10.4354	10.9187	15.0628	6.30124	7.23332	0	13	13	17	6	6	0	middle
hsa-miR-502-5p	AATCCTTGCTATCTGGGTGCTAGT	down	0.387567	-1.36748	0.0574276	64.29	24.9167	65.0204	43.6748	84.1747	40.9581	18.0833	15.7087	81	52	95	39	15	12	middle
hsa-miR-4473	TAGTGCTCTCCGTTACAAGTAT	up	3.18275	1.67028	0.0574539	15.2917	48.6699	16.8571	20.1576	8.86049	66.1631	45.8111	34.0355	21	24	10	63	38	26	middle
hsa-miR-495-3p	AAACAAACATGGTGCACTTCTT	down	0.612742	-0.706647	0.0577225	67.7258	41.4985	71.4422	69.7117	62.0234	28.3556	54.2499	41.8898	89	83	70	27	45	32	middle
hsa-miR-378a-5p	CTCCTGACTCCAGGTCCTGTGT	up	1.43454	0.52059	0.0582098	405.41	581.577	459.959	330.081	426.19	680.534	503.922	560.276	573	393	481	648	418	428	middle
hsa-miR-585-5p	CTAGCACACAGATACGCCCAGA	down	0.347397	-1.52534	0.0584317	23.1487	8.04178	22.4762	15.9581	31.0117	11.5523	6.02777	6.54528	28	19	35	11	5	5	middle
hsa-miR-518b	CAAAGCGCTCCCCTTTAGAGGT	down	0.787714	-0.344257	0.0585347	173.366	136.563	183.823	152.862	183.412	140.728	130.2	138.76	229	182	207	134	108	106	middle
hsa-miR-409-3p	GAATGTTGCTCGGTGAACCCCT	down	0.461183	-1.11659	0.058622	208.356	96.0902	266.503	150.342	208.222	70.3639	130.2	87.7068	332	179	235	67	108	67	middle
hsa-miR-146b-3p	GCCCTGTGGACTCAGTTCTGGT	up	1.86831	0.901733	0.0586402	22.06	41.2149	18.4626	18.4778	29.2396	44.1087	49.4277	30.1083	23	22	33	42	41	23	middle
hsa-miR-3059-5p	TTTCCTCTCTGCCCCATAGGGT	down	0.157136	-2.66991	0.059337	58.6767	9.22024	51.3741	85.6698	38.9862	0	13.2611	14.3996	64	102	44	0	11	11	middle
hsa-mir-7-3-p3	CAACAAGTCACAGCCGGCCTCA	up	4.82396	2.27022	0.0603647	5.51935	26.6251	0	5.0394	11.5186	18.9037	21.7	39.2717	0	6	13	18	18	30	middle
hsa-miR-2113	ATTTGTGCTTGGCTCTGTCAC	up	1.43103	0.517051	0.0613499	37.754	54.027	42.5442	35.2758	35.442	60.912	56.661	44.5079	53	42	40	58	47	34	middle
hsa-miR-5688	TAACAAACACCTGTAAAACAGC	up	3.88229	1.95691	0.0613781	3.67289	14.2592	4.81632	0	6.20234	14.7029	8.43888	19.6359	6	0	7	14	7	15	middle
hsa-miR-423-5p	TGAGGGGCAGAGAGCGAGACTTT	up	1.2547	0.32734	0.0619712	19841	24894.5	21199.9	16742.6	21580.6	23965.7	26870.6	23847.1	26410	19934	24356	22820	22289	18217	high
hsa-miR-155-5p	TTAATGCTAATCGTGATAGGGGTT	down	0.403021	-1.31107	0.063207	183.468	73.9415	137.265	173.019	240.119	76.6651	62.6888	82.4706	171	206	271	73	52	63	middle
hsa-miR-379-5p	TGGTAGACTATGGAACGTAGG	down	0.737944	-0.438417	0.0632451	146.717	108.269	155.728	161.261	123.161	106.071	120.555	98.1793	194	192	139	101	100	75	middle
hsa-miR-212-3p	TAACAGTCTCCAGTCACGGCCAC	up	1.32203	0.402755	0.0633837	47.7328	63.1042	56.9932	43.6748	42.5304	59.8618	62.6888	66.7619	71	52	48	57	52	51	middle
hsa-miR-216a-5p	TAATCTCAGCTGGCAACTGTGAG	down	0.480555	-1.05723	0.0648523	26750.7	12855.2	28094.4	32856.1	19301.7	10892.8	14278.6	13394.3	34999	39119	21784	10372	11844	10232	high
hsa-miR-4454	ATCCGAGTCACGGCACCA	up	3.01475	1.59204	0.0654858	340.156	1025.49	400.558	328.401	291.51	742.497	946.36	1387.6	499	391	329	707	785	1060	middle
hsa-miR-3605-3p	CCTCCGTGTTACCTGTCCTCTAG	up	1.45507	0.541093	0.0656835	63.9301	93.0231	64.2177	48.7142	78.8584	87.1672	97.6499	94.2521	80	58	89	83	81	72	middle
hsa-miR-548g-5p	CAAAAGTAATTGCAGTTTTTGA	down	0.331673	-1.59217	0.0674002	3.00041	0.995155	2.40816	3.63957	2.9535	0	0.803703	2.18176	3	4.33333	3.33333	0	0.666667	1.66667	low
hsa-miR-135b-3p	ATGTAGGGCTAAAAGCCATGGGT	down	0.723144	-0.467644	0.0675599	699.01	505.486	729.673	722.314	645.044	423.234	623.271	469.951	909	860	728	403	517	359	middle
hsa-miR-181b-2-3p	CTCACTGATCAATGAATGCAAA	down	0.200611	-2.31753	0.0677937	84.4987	16.9514	47.3605	102.468	103.668	15.7531	18.0833	17.0177	59	122	117	15	15	13	middle
hsa-miR-449c-5p	AGGCAGTGTATTGCTAGCGGCTGTT	up	18.6026	4.21743	0.0680598	53.7123	999.188	40.9388	37.7955	82.4026	1520.7	759.499	717.363	51	45	93	1448	630	548	middle
hsa-miR-302d-5p	ACTTTAACATGGAGGCACTTGC	down	0.715677	-0.482619	0.0683218	1214.07	868.881	1024.27	1344.68	1273.25	884.275	842.682	879.686	1276	1601	1437	842	699	672	middle
hsa-miR-1285-3p	TCTGGGCAACAAAGTGAGACCT	down	0.640562	-0.642589	0.0688234	80.7388	51.7183	78.6666	87.3496	76.2002	66.1631	53.6472	35.3445	98	104	86	63	44.5	27	middle
hsa-mir-4484-p3	AAAAAAGGCGGGAGAAGC	down	0.388388	-1.36443	0.0695138	11.0255	4.28218	8.02721	11.7586	13.2907	6.30124	0	6.54528	10	14	15	6	0	5	middle
hsa-miR-449a	TGGCAGTGTATTGTTAGCTGGT	up	20.4583	4.35461	0.070074	47.3624	968.955	39.3333	32.7561	69.9979	1481.32	655.821	769.725	49	39	79	1410.5	544	588	middle
hsa-miR-1283	CTACAAAGGAAAGCGCTTTCTG	down	0.484379	-1.04579	0.070117	51.0309	24.7183	42.5442	44.0948	66.4537	23.1046	22.9055	28.1447	53	52.5	75	22	19	21.5	middle
hsa-miR-7851-3p	TACCTGGGAGACTGAGGTTGGAT	down	0.593106	-0.753638	0.0710411	30.5843	18.1397	26.4898	37.7955	27.4675	14.7029	25.3166	14.3996	33	45	31	14	21	11	middle
hsa-miR-548w	AAAAGTAACTGCGGTTTTTGCC	down	0.593233	-0.753328	0.0711354	44.8232	26.5906	48.966	40.3152	45.1885	18.9037	22.9055	37.9627	61	48	51	18	19	29	middle
hsa-miR-521	AACGCACTTCCCTTTAGAGTGT	down	0.240091	-2.05835	0.0715092	5.83229	1.40028	8.02721	5.0394	4.43025	4.20083	0	0	10	6	5	4	0	0	low
hsa-miR-22-3p	AAGCTGCCAGTTGAAGAACTGT	up	1.34698	0.429729	0.0717131	39097.4	52663.4	38079.5	42042.1	37170.7	60176.9	45536.2	52277.2	47438	50056	41951	57300	37772	39935	high
hsa-miR-501-5p	AATCCTTTGTCCCTGGGTGAGAGT	down	0.833953	-0.261961	0.0721858	828.855	691.227	911.891	771.029	803.647	763.501	642.56	667.619	1136	918	907	727	533	510	middle
hsa-miR-636	TGTGCTTGCTCGTCCCGCCCGCAGT	down	0.287517	-1.79828	0.0727954	15.6914	4.51152	20.068	8.399	18.607	6.30124	7.23332	0	25	10	21	6	6	0	middle
hsa-miR-483-5p	AAGACGGGAGGAAAGAAGGGAG	down	0.0540198	-4.21037	0.0730919	80.8677	4.36846	81.8775	41.995	118.731	5.25104	0	7.85434	102	50	134	5	0	6	middle
hsa-miR-137-3p	TTATTGCTTAAGAATACGCGTAG	down	0.530727	-0.913959	0.07358	7151.94	3795.73	7049.49	8900.42	5505.91	3549.7	3871.03	3966.44	8782	10597	6214	3380	3211	3030	high
hsa-mir-33a-p3	TGTTCTGGTGGTACCCATG	down	0.562384	-0.830372	0.0744622	268.38	150.933	286.571	318.322	200.247	139.678	149.489	163.632	357	379	226	133	124	125	middle
hsa-miR-125a-3p	ACAGGTGAGGTTCTTGGGAGC	up	1.26954	0.344303	0.0745147	344.63	437.521	309.85	320.002	404.038	417.983	436.411	458.17	386	381	456	398	362	350	middle
hsa-miR-3148	TGGAAAAAACTGGTGTGTGCTT	up	7.92547	2.9865	0.0745718	1.33787	10.6032	4.0136	0	0	5.25104	10.85	15.7087	5	0	0	5	9	12	middle
hsa-miR-513a-5p	TTCACAGGGAGGTGTCATTTAT	down	0.313157	-1.67504	0.0749569	10.8796	3.407	6.42177	14.6983	11.5186	3.67573	0	6.54528	8	17.5	13	3.5	0	5	middle
hsa-miR-548e-5p	CAAAAGCAATCGCGGTTTTTGC	down	0.644269	-0.634265	0.0750553	20.885	13.4556	16.0544	22.6773	23.9233	12.6025	12.0555	15.7087	20	27	27	12	10	12	middle
hsa-miR-92a-1-5p	AGGTTGGGATCGGTTGCAATGCT	down	0.642733	-0.637709	0.0751504	644.157	414.021	547.456	610.608	774.407	350.769	550.938	340.355	682	727	874	334	457	260	middle
hsa-miR-1276	TAAAGAGCCCTGTGGAGACACC	down	0.276533	-1.85447	0.0752333	36.5782	10.1151	47.3605	41.995	20.3791	6.30124	9.64443	14.3996	59	50	23	6	8	11	middle
hsa-miR-20b-3p	ACTGTAGTATGGGCACTTCCAG	up	1.18996	0.250908	0.0755881	1999.67	2379.52	2028.48	1883.9	2086.65	2576.16	2145.89	2416.52	2527	2243	2355	2453	1780	1846	middle
hsa-miR-211-5p	TTCCCTTTGTCATCCTTCGCCT	up	1.80705	0.853634	0.0762618	59.673	107.832	84.2857	33.596	61.1374	112.372	102.472	108.652	105	40	69	107	85	83	middle
hsa-miR-124-5p	CGTGTTCACAGCGGACCTTGAT	down	0.687056	-0.5415	0.0764867	1878.33	1290.52	2255.91	1779.75	1599.32	1067.71	1526.63	1277.2	2810.33	2119	1805	1016.67	1266.33	975.667	middle
hsa-miR-380-3p	TATGTAATATGGTCCACATCT	down	0.3617	-1.46713	0.0774002	16.9168	6.11881	11.2381	22.6773	16.8349	10.5021	0	7.85434	14	27	19	10	0	6	middle
hsa-miR-550a-3p	TGTCTTACTCCCTCAGGCACAT	down	0.610174	-0.712707	0.077841	178.1	108.672	209.243	136.624	188.433	99.0696	111.313	115.633	260.667	162.667	212.667	94.3333	92.3333	88.3333	middle
hsa-miR-522-3p	AAAATGGTTCCCTTTAGAGTGT	down	0.433511	-1.20586	0.0791535	64.3007	27.8751	50.5714	86.5097	55.8211	29.4058	24.1111	30.1083	63	103	63	28	20	23	middle
hsa-miR-548f-3p	AAAACTGTAATTACTTTTGGAC	down	0.579606	-0.786855	0.0807497	119.291	69.1417	96.7279	149.502	111.642	74.5647	68.7166	64.1438	120.5	178	126	71	57	49	middle
hsa-miR-9-5p	TCTTTGGTTATCTAGCTGTATGA	down	0.280255	-1.83519	0.0807498	7445.72	2086.7	6057.87	5564.9	10714.4	1825.96	2409.9	2024.24	7546.67	6625.67	12092.3	1738.67	1999	1546.33	high
hsa-miR-195-5p	TAGCAGCACAGAAATATTGGCA	up	1.44068	0.526746	0.0808812	104.053	149.907	76.2585	125.145	110.756	171.184	125.378	153.16	95	149	125	163	104	117	middle
hsa-miR-153-5p	GTCATTTTTGTGATGTTGCAGCT	down	0.679823	-0.556769	0.0808875	227.667	154.774	236	266.248	180.754	183.786	132.611	147.923	294	317	204	175	110	113	middle
hsa-miR-6511b-3p	CCTCACCACCCCTTCTGCCTGCA	up	1.57557	0.655873	0.0811564	68.1789	107.421	91.5102	55.4334	57.5932	91.368	131.405	99.4883	114	66	65	87	109	76	middle
hsa-miR-411-5p	TAGTAGACCGTATAGCGTACG	down	0.703315	-0.507757	0.0813988	95.3217	67.0412	78.6666	97.4284	109.87	70.3639	62.6888	68.071	98	116	124	67	52	52	middle
hsa-miR-186-5p	CAAAGAATTCTCCTTTTGGGCTT	up	1.10954	0.149958	0.0817093	18023.9	19998.2	17907.1	17824.4	18340.3	21157.5	19866.3	18970.9	22308	21222	20699	20146	16479	14492	high
hsa-miR-2116-3p	TCCTCCCATGCCAAGAACTCC	down	0.489784	-1.02978	0.081946	24.1908	11.8483	29.7007	26.0369	16.8349	8.40166	19.2889	7.85434	37	31	19	8	16	6	middle
hsa-miR-514a-3p	ATTGACACTTCTGTGAGTAGA	down	0.597759	-0.742365	0.0819608	95.9872	57.3772	69.8367	110.027	108.098	63.5375	46.4138	62.1802	87	131	122	60.5	38.5	47.5	middle
hsa-miR-548a-3p	CAAAACTGGCAATTACTTTTGC	down	0.762483	-0.391223	0.083242	21.2435	16.1978	20.068	22.3973	21.2652	12.9526	16.8778	18.7631	25	26.6667	24	12.3333	14	14.3333	middle
hsa-miR-29b-3p	CTAGCACCATTTGAAATCAGTGT	up	1.64127	0.714817	0.0836236	41.3937	67.9385	40.9388	41.1551	42.0873	81.3911	53.0444	69.38	51	49	47.5	77.5	44	53	middle
hsa-miR-597-5p	TGTGTCACTCGATGACCACTGT	down	0.51254	-0.964263	0.0846492	34.42	17.6417	32.9116	41.995	28.3536	7.35145	18.0833	27.4902	41	50	32	7	15	21	middle
hsa-miR-548l	AAAAGTATTTGCGGGTTTTGTC	down	0.485225	-1.04328	0.0851953	33.045	16.0342	31.3061	39.4753	28.3536	7.35145	13.2611	27.4902	39	47	32	7	11	21	middle
hsa-miR-182-3p	GGTGGTTCTAGACTTGCCAACT	down	0.393184	-1.34672	0.0853955	29.0493	11.4217	24.0816	29.3965	33.6699	21.0041	13.2611	0	30	35	38	20	11	0	middle
hsa-miR-548ab	AAAAGTAATTGTGGATTTTGCT	up	2.11123	1.07808	0.086359	16.453	34.736	18.0612	10.9187	20.3791	45.684	34.9611	23.563	22.5	13	23	43.5	29	18	middle
hsa-miR-670-5p	GTCCCTGAGTGTATGTGGTGAACC	down	0.492984	-1.02039	0.0864473	14.5322	7.16414	13.6463	19.3177	10.6326	6.30124	6.02777	9.1634	17	23	12	6	5	7	middle
hsa-miR-193b-3p	AACTGGCCCTCAAAGTCCCGCT	up	1.41204	0.49778	0.0866101	4175.52	5896	5025.03	2995.08	4506.45	5840.2	5311.67	6536.12	6260	3566	5086	5561	4406	4993	middle
hsa-mir-4473-p5	ACTTGTAATGGAGAACACTAAGC	up	11.939	3.57761	0.0870005	1.7721	21.1572	0	0	5.3163	33.6066	18.0833	11.7815	0	0	6	32	15	9	middle
hsa-miR-6511a-3p	CCTCACCATCCCTTCTGCCTGCA	up	1.58982	0.668867	0.0880297	43.6312	69.3659	61.8095	32.7561	36.328	75.6149	57.8666	74.6162	77	39	41	72	48	57	middle
hsa-miR-329-3p	AACACACCTGGTTAACCTCTTT	down	0.592676	-0.754686	0.0880583	67.6164	40.0746	72.6462	81.4703	48.7327	32.5564	38.5777	49.0896	90.5	97	55	31	32	37.5	middle
hsa-miR-29c-3p	TAGCACCATTTGAAATCGGTTA	up	1.80827	0.854612	0.0882335	404.6	731.626	327.51	495.541	390.748	927.333	529.238	738.308	408	590	441	883	439	564	middle
hsa-miR-1271-3p	AGTGCCTGCTATGTGCCAGGC	up	3.80626	1.92837	0.088248	1.7721	6.74507	0	0	5.3163	5.25104	8.43888	6.54528	0	0	6	5	7	5	low
hsa-miR-891a-5p	TGCAACGAACCTGAGCCACTGA	down	0.471981	-1.0832	0.0891082	192.933	91.0609	262.49	145.303	171.008	72.4643	116.939	83.7796	327	173	193	69	97	64	middle
hsa-miR-34b-5p	AGGCAGTGTCATTAGCTGATTGT	down	0.509777	-0.972063	0.0894464	486.055	247.779	328.313	561.893	567.958	274.104	221.822	247.412	409	669	641	261	184	189	middle
hsa-miR-376c-3p	AACATAGAGGAAATTCCACGT	down	0.441816	-1.17848	0.0901529	34.1324	15.0803	46.5578	31.9162	23.9233	11.5523	19.2889	14.3996	58	38	27	11	16	11	middle
hsa-miR-548aa	AAAACCACAATTACTTTTGCAC	down	0.592467	-0.755192	0.0904118	41.4238	24.5422	35.7211	53.4037	35.1466	28.3556	25.4171	19.854	44.5	63.5833	39.6667	27	21.0833	15.1667	middle
hsa-miR-671-5p	AGGAAGCCCTGGAGGGGCTGGAGG	down	0.763579	-0.38915	0.0915486	738.621	563.996	786.666	725.674	703.523	672.133	562.994	456.861	980	864	794	640	467	349	middle
hsa-miR-605-3p	AGAAGGCACTATGAGATTTAGA	down	0.717897	-0.478152	0.0915748	17.0638	12.2501	16.8571	20.1576	14.1768	10.5021	14.4666	11.7815	21	24	16	10	12	9	middle
hsa-miR-450a-5p	TTTTGCGATGTGTTCCTAATAT	up	1.41982	0.50571	0.0926201	415.27	589.609	309.449	511.499	424.861	609.645	579.269	579.912	385.5	609	479.5	580.5	480.5	443	middle
hsa-miR-149-5p	TCTGGCTCCGTGTCTTCACTCCC	down	0.782495	-0.353847	0.0932866	15065.2	11788.4	17247.3	13230.1	14718.2	10219.6	11968.7	13177	21486	15752	16611	9731	9928	10066	high
hsa-mir-7108-p3	CCCTCCCCGCCCCGCGCCC	down	0.094086	-3.40988	0.0934293	25.6266	2.41111	38.5306	27.7167	10.6326	0	7.23332	0	48	33	12	0	6	0	middle
hsa-mir-7110-p3	CTCTCTCTCTCTCTCCCCC	down	0.20456	-2.28941	0.0948693	10.6656	2.18176	7.22449	16.798	7.97444	0	0	6.54528	9	20	9	0	0	5	middle
hsa-miR-378c	ACTGGACTTGGAGTCAGAAG	down	0.846204	-0.240922	0.0969485	694.138	587.382	701.511	696.207	684.695	633.188	613.627	515.332	873.917	828.917	772.75	602.917	509	393.667	middle
hsa-miR-126-3p	TCGTACCGTGAGTAATAATGCG	up	1.33732	0.419348	0.0983876	1039.81	1390.56	897.442	1133.03	1088.95	1640.42	1194.7	1336.55	1118	1349	1229	1562	991	1021	middle
hsa-miR-1228-5p	GTGGGCGGGGGCAGGTGTGTGG	up	2.87163	1.52187	0.0990891	5.84125	16.7739	10.4354	0	7.08839	10.5021	24.1111	15.7087	13	0	8	10	20	12	middle
hsa-miR-1912-3p	TACCCAGAGCATGCAGTGTGAA	down	0.755187	-0.405093	0.0994174	98.9626	74.7353	94.7211	94.0688	108.098	66.1631	65.0999	92.943	118	112	122	63	54	71	middle
