# Supplementary material for: An antisense oligonucleotide-based strategy to ameliorate cognitive dysfunction in the 22q11.2 Deletion Syndrome
Source: eLife. 2025 May 27;13:RP103328. doi: 10.7554/eLife.103328 (PMC12113277; doi:10.7554/eLife.103328)
Supplement: Supplementary file 3. [file elife-103328-supp3.xlsx]

## Sheet: Supp File 3
Supplementary File 3. DEGs in cortical neurons (DIV8) from 22q11.2DS/SCZ (Q6) and control line (Q5) derived using small-molecule inhibitors of SMAD and WNT signaling pathways. Significant protein-coding DEGs are shown here after cut off at (Log2FC< 0.4 and > 3). P values were corrected (adjusted pvalue) using the Benjamini–Hochberg false discovery rate.
gene_id	gene_name	transcript_id	Description	trans_type	fc	log2(fc)	qval (FDR adjusted Pvalue)	regulation
ENSG00000079931	MOXD1	ENST00000336749;ENST00000367963;ENST00000489128;ENST00000392401	monooxygenase DBH like 1 [Source:HGNC Symbol;Acc:HGNC:21063]	protein_coding;processed_transcript	0.125523	-2.99398	7.83909e-17	down
ENSG00000198959	TGM2	ENST00000361475;ENST00000468262;ENST00000469269;ENST00000474777;ENST00000373403;ENST00000453095	transglutaminase 2 [Source:HGNC Symbol;Acc:HGNC:11778]	protein_coding;retained_intron	0.125757	-2.99129	2.64983e-48	down
ENSG00000211448	DIO2	ENST00000438257;ENST00000557010;ENST00000553968;ENST00000555750;ENST00000556384;ENST00000422005;ENST00000554188;ENST00000553594;ENST00000555844;ENST00000556811;ENST00000557125	iodothyronine deiodinase 2 [Source:HGNC Symbol;Acc:HGNC:2884]	protein_coding;nonsense_mediated_decay;processed_transcript	0.125886	-2.98981	3.25516e-13	down
ENSG00000163435	ELF3	ENST00000367284;ENST00000359651;ENST00000495848;ENST00000475698;ENST00000470384;ENST00000446188;ENST00000367283;ENST00000498017;ENST00000490203;ENST00000479874	E74 like ETS transcription factor 3 [Source:HGNC Symbol;Acc:HGNC:3318]	protein_coding;processed_transcript	0.126401	-2.98392	1.07105e-33	down
ENSG00000165621	OXGR1	ENST00000298440;ENST00000543457;ENST00000541038;ENST00000541518	oxoglutarate receptor 1 [Source:HGNC Symbol;Acc:HGNC:4531]	protein_coding	0.126517	-2.9826	7.99929e-07	down
ENSG00000168505	GBX2	ENST00000306318;ENST00000465889;ENST00000551105	gastrulation brain homeobox 2 [Source:HGNC Symbol;Acc:HGNC:4186]	protein_coding;processed_transcript	0.126973	-2.97741	0.00315043	down
ENSG00000204267	TAP2	ENST00000374897;ENST00000620123;ENST00000652259;ENST00000485701;ENST00000464100	transporter 2, ATP binding cassette subfamily B member [Source:HGNC Symbol;Acc:HGNC:44]	protein_coding;processed_transcript;retained_intron	0.127918	-2.96671	7.47809e-28	down
ENSG00000156966	B3GNT7	ENST00000287590;ENST00000479618	UDP-GlcNAc:betaGal beta-1,3-N-acetylglucosaminyltransferase 7 [Source:HGNC Symbol;Acc:HGNC:18811]	protein_coding;processed_transcript	0.128955	-2.95506	2.2215e-14	down
ENSG00000147488	ST18	ENST00000276480;ENST00000522251;ENST00000518037;ENST00000518053;ENST00000521824;ENST00000518545;ENST00000520279;ENST00000521582;ENST00000523652;ENST00000518453;ENST00000521549;ENST00000520811;ENST00000519201;ENST00000520257;ENST00000521119;ENST00000518501;ENST00000522102;ENST00000517580;ENST00000524078;ENST00000524183;ENST00000519118;ENST00000520716;ENST00000517456;ENST00000522861	ST18 C2H2C-type zinc finger transcription factor [Source:HGNC Symbol;Acc:HGNC:18695]	protein_coding;nonsense_mediated_decay;processed_transcript;retained_intron	0.129566	-2.94825	5.1482e-33	down
ENSG00000172183	ISG20	ENST00000306072;ENST00000546338;ENST00000557824;ENST00000558942;ENST00000558236;ENST00000560746;ENST00000379224;ENST00000560573;ENST00000560741;ENST00000558992;ENST00000559876	interferon stimulated exonuclease gene 20 [Source:HGNC Symbol;Acc:HGNC:6130]	protein_coding;retained_intron;processed_transcript	0.130956	-2.93284	5.11312e-09	down
ENSG00000268235	TCP11X1	ENST00000622971;ENST00000597070;ENST00000623912	t-complex 11 family, X-linked 1 [Source:HGNC Symbol;Acc:HGNC:48369]	protein_coding;nonsense_mediated_decay	0.131516	-2.92669	0.00517725	down
ENSG00000196604	POTEF	ENST00000409914;ENST00000361163	POTE ankyrin domain family member F [Source:HGNC Symbol;Acc:HGNC:33905]	protein_coding	0.131607	-2.92569	5.72463e-11	down
ENSG00000197956	S100A6	ENST00000368719;ENST00000496817;ENST00000368720;ENST00000462951;ENST00000462776	S100 calcium binding protein A6 [Source:HGNC Symbol;Acc:HGNC:10496]	protein_coding;retained_intron	0.13183	-2.92325	4.14343e-37	down
ENSG00000163638	ADAMTS9	ENST00000475557;ENST00000482490;ENST00000295903;ENST00000477180;ENST00000498707;ENST00000481060;ENST00000459780;ENST00000467119;ENST00000467257;ENST00000494004	ADAM metallopeptidase with thrombospondin type 1 motif 9 [Source:HGNC Symbol;Acc:HGNC:13202]	retained_intron;protein_coding;nonsense_mediated_decay	0.132984	-2.91067	1.05209e-48	down
ENSG00000185985	SLITRK2	ENST00000335565;ENST00000370490	SLIT and NTRK like family member 2 [Source:HGNC Symbol;Acc:HGNC:13449]	protein_coding	0.133334	-2.90688	1.22454e-05	down
ENSG00000164932	CTHRC1	ENST00000520337;ENST00000330295;ENST00000520880;ENST00000415886	collagen triple helix repeat containing 1 [Source:HGNC Symbol;Acc:HGNC:18831]	protein_coding	0.133578	-2.90424	7.85851e-17	down
ENSG00000143867	OSR1	ENST00000272223;ENST00000487581;ENST00000498844	odd-skipped related transcription factor 1 [Source:HGNC Symbol;Acc:HGNC:8111]	protein_coding;retained_intron;processed_transcript	0.133607	-2.90393	1.70407e-08	down
ENSG00000162670	BRINP3	ENST00000367462;ENST00000445957;ENST00000633243;ENST00000631494;ENST00000463404	BMP/retinoic acid inducible neural specific 3 [Source:HGNC Symbol;Acc:HGNC:22393]	protein_coding;processed_transcript	0.13376	-2.90228	6.4968e-06	down
ENSG00000116039	ATP6V1B1	ENST00000234396;ENST00000412314;ENST00000432098;ENST00000454446;ENST00000463380;ENST00000495118;ENST00000433895	ATPase H+ transporting V1 subunit B1 [Source:HGNC Symbol;Acc:HGNC:853]	protein_coding;retained_intron	0.133923	-2.90053	1.93462e-11	down
ENSG00000253767	PCDHGA8	ENST00000610569;ENST00000398604	protocadherin gamma subfamily A, 8 [Source:HGNC Symbol;Acc:HGNC:8706]	protein_coding	0.133955	-2.90018	0.00495231	down
ENSG00000052344	PRSS8	ENST00000317508;ENST00000567833;ENST00000568261;ENST00000564025;ENST00000567531;ENST00000567797	serine protease 8 [Source:HGNC Symbol;Acc:HGNC:9491]	protein_coding;retained_intron	0.134294	-2.89653	1.47569e-49	down
ENSG00000204632	HLA-G	ENST00000376818;ENST00000360323;ENST00000478519;ENST00000428701;ENST00000478355;ENST00000376828;ENST00000376815	major histocompatibility complex, class I, G [Source:HGNC Symbol;Acc:HGNC:4964]	protein_coding;nonsense_mediated_decay;retained_intron	0.13454	-2.89389	0.000120075	down
ENSG00000116016	EPAS1	ENST00000263734;ENST00000466465;ENST00000467888;ENST00000463191;ENST00000475822;ENST00000465318;ENST00000483692;ENST00000460015;ENST00000449347;ENST00000468530	endothelial PAS domain protein 1 [Source:HGNC Symbol;Acc:HGNC:3374]	protein_coding;retained_intron;processed_transcript	0.134647	-2.89274	7.95796e-32	down
ENSG00000153029	MR1	ENST00000434571;ENST00000367580;ENST00000438435;ENST00000367579;ENST00000614012;ENST00000617803;ENST00000486453;ENST00000282990;ENST00000367578	major histocompatibility complex, class I-related [Source:HGNC Symbol;Acc:HGNC:4975]	protein_coding;processed_transcript;retained_intron	0.134652	-2.89269	3.91852e-05	down
ENSG00000100097	LGALS1	ENST00000215909;ENST00000425542;ENST00000454173;ENST00000472321;ENST00000480207;ENST00000464120;ENST00000489315	galectin 1 [Source:HGNC Symbol;Acc:HGNC:6561]	protein_coding;nonsense_mediated_decay;retained_intron;processed_transcript	0.135284	-2.88594	1.00637e-20	down
ENSG00000137843	PAK6	ENST00000542403;ENST00000455577;ENST00000560346;ENST00000558878;ENST00000558106;ENST00000260404;ENST00000559901;ENST00000558658;ENST00000441369;ENST00000561230;ENST00000558055;ENST00000560684;ENST00000557926;ENST00000453867;ENST00000560806;ENST00000558183;ENST00000560669;ENST00000559139;ENST00000559617;ENST00000557808	p21 (RAC1) activated kinase 6 [Source:HGNC Symbol;Acc:HGNC:16061]	protein_coding;processed_transcript;retained_intron	0.135467	-2.88399	2.81306e-17	down
ENSG00000079385	CEACAM1	ENST00000161559;ENST00000488639;ENST00000485605;ENST00000403444;ENST00000465051;ENST00000403461;ENST00000600172;ENST00000358394;ENST00000352591;ENST00000599389;ENST00000471298;ENST00000344391;ENST00000377806;ENST00000403136	CEA cell adhesion molecule 1 [Source:HGNC Symbol;Acc:HGNC:1814]	protein_coding;processed_transcript;retained_intron	0.135534	-2.88328	6.59871e-08	down
ENSG00000134070	IRAK2	ENST00000256458	interleukin 1 receptor associated kinase 2 [Source:HGNC Symbol;Acc:HGNC:6113]	protein_coding	0.135535	-2.88326	9.65715e-14	down
ENSG00000214357	NEURL1B	ENST00000369800;ENST00000522853;ENST00000520919	neuralized E3 ubiquitin protein ligase 1B [Source:HGNC Symbol;Acc:HGNC:35422]	protein_coding	0.136106	-2.8772	1.10113e-37	down
ENSG00000135077	HAVCR2	ENST00000307851;ENST00000521665;ENST00000522593;ENST00000522902;ENST00000517358;ENST00000524219	hepatitis A virus cellular receptor 2 [Source:HGNC Symbol;Acc:HGNC:18437]	protein_coding;retained_intron;processed_transcript	0.137411	-2.86343	0.00106583	down
ENSG00000145779	TNFAIP8	ENST00000274456;ENST00000504771;ENST00000388882;ENST00000415806;ENST00000513374;ENST00000504642;ENST00000503646	TNF alpha induced protein 8 [Source:HGNC Symbol;Acc:HGNC:17260]	protein_coding	0.138289	-2.85424	3.01046e-16	down
ENSG00000105048	TNNT1	ENST00000587465;ENST00000585321;ENST00000536926;ENST00000291901;ENST00000588147;ENST00000588981;ENST00000592920;ENST00000356783;ENST00000586649;ENST00000587089;ENST00000593046;ENST00000589745;ENST00000586282;ENST00000588426;ENST00000589226;ENST00000593194;ENST00000587758	troponin T1, slow skeletal type [Source:HGNC Symbol;Acc:HGNC:11948]	protein_coding;processed_transcript;nonsense_mediated_decay;retained_intron	0.13833	-2.85381	2.3774e-18	down
ENSG00000122691	TWIST1	ENST00000242261;ENST00000354571;ENST00000443687	twist family bHLH transcription factor 1 [Source:HGNC Symbol;Acc:HGNC:12428]	protein_coding;nonsense_mediated_decay	0.139703	-2.83957	1.51811e-07	down
ENSG00000065320	NTN1	ENST00000173229;ENST00000436734	netrin 1 [Source:HGNC Symbol;Acc:HGNC:8029]	protein_coding	0.141158	-2.82462	1.2998e-23	down
ENSG00000010278	CD9	ENST00000382519;ENST00000645368;ENST00000009180;ENST00000610354;ENST00000382518;ENST00000646407;ENST00000546073;ENST00000538418;ENST00000645565;ENST00000536586;ENST00000481267;ENST00000642746;ENST00000382515;ENST00000538834;ENST00000543916;ENST00000540891	CD9 molecule [Source:HGNC Symbol;Acc:HGNC:1709]	protein_coding;retained_intron;processed_transcript	0.141246	-2.82372	3.27874e-16	down
ENSG00000136244	IL6	ENST00000485300;ENST00000401651;ENST00000404625;ENST00000258743;ENST00000401630;ENST00000464710;ENST00000426291;ENST00000407492;ENST00000406575	interleukin 6 [Source:HGNC Symbol;Acc:HGNC:6018]	retained_intron;protein_coding	0.142446	-2.81151	5.78721e-06	down
ENSG00000259207	ITGB3	ENST00000559488;ENST00000573377;ENST00000571680	integrin subunit beta 3 [Source:HGNC Symbol;Acc:HGNC:6156]	protein_coding;nonsense_mediated_decay	0.142877	-2.80715	1.0444e-12	down
ENSG00000112246	SIM1	ENST00000262901;ENST00000511871;ENST00000369208;ENST00000505753	SIM bHLH transcription factor 1 [Source:HGNC Symbol;Acc:HGNC:10882]	protein_coding;retained_intron	0.143339	-2.8025	7.5972e-21	down
ENSG00000235098	ANKRD65	ENST00000442470;ENST00000427211;ENST00000454272;ENST00000520296;ENST00000537107	ankyrin repeat domain 65 [Source:HGNC Symbol;Acc:HGNC:42950]	protein_coding	0.143481	-2.80106	1.31765e-11	down
ENSG00000145113	MUC4	ENST00000463781;ENST00000462323;ENST00000464234;ENST00000469992;ENST00000467235;ENST00000349607;ENST00000477756;ENST00000392407;ENST00000486425;ENST00000448861;ENST00000339251;ENST00000308466;ENST00000415455;ENST00000480843;ENST00000477086;ENST00000466475;ENST00000478685;ENST00000346145;ENST00000470451;ENST00000479406;ENST00000478156;ENST00000475231	mucin 4, cell surface associated [Source:HGNC Symbol;Acc:HGNC:7514]	protein_coding;nonsense_mediated_decay;retained_intron;processed_transcript	0.143778	-2.79808	1.01237e-19	down
ENSG00000189190	ZNF600	ENST00000648973;ENST00000648893;ENST00000338230;ENST00000598369;ENST00000597124;ENST00000594028;ENST00000599893;ENST00000647907	zinc finger protein 600 [Source:HGNC Symbol;Acc:HGNC:30951]	protein_coding;nonsense_mediated_decay;processed_transcript	0.144126	-2.7946	6.15721e-07	down
ENSG00000180730	SHISA2	ENST00000319420	shisa family member 2 [Source:HGNC Symbol;Acc:HGNC:20366]	protein_coding	0.144153	-2.79433	3.60945e-41	down
ENSG00000087245	MMP2	ENST00000219070;ENST00000543485;ENST00000564864;ENST00000570283;ENST00000568715;ENST00000437642;ENST00000570308;ENST00000566564	matrix metallopeptidase 2 [Source:HGNC Symbol;Acc:HGNC:7166]	protein_coding;nonsense_mediated_decay	0.144191	-2.79395	2.35737e-59	down
ENSG00000136869	TLR4	ENST00000355622;ENST00000394487;ENST00000490685;ENST00000472304	toll like receptor 4 [Source:HGNC Symbol;Acc:HGNC:11850]	protein_coding;processed_transcript	0.144231	-2.79354	0.00298995	down
ENSG00000121898	CPXM2	ENST00000241305;ENST00000368854;ENST00000481775;ENST00000615851	carboxypeptidase X, M14 family member 2 [Source:HGNC Symbol;Acc:HGNC:26977]	protein_coding;processed_transcript	0.144345	-2.79241	4.08449e-06	down
ENSG00000113248	PCDHB15	ENST00000231173;ENST00000623671	protocadherin beta 15 [Source:HGNC Symbol;Acc:HGNC:8686]	protein_coding	0.144389	-2.79197	1.12186e-10	down
ENSG00000180914	OXTR	ENST00000316793;ENST00000431493;ENST00000449615;ENST00000474615	oxytocin receptor [Source:HGNC Symbol;Acc:HGNC:8529]	protein_coding;retained_intron	0.144487	-2.79098	2.58242e-16	down
ENSG00000135636	DYSF	ENST00000394120;ENST00000410041;ENST00000409762;ENST00000409651;ENST00000409366;ENST00000413539;ENST00000409744;ENST00000410020;ENST00000429174;ENST00000409582;ENST00000258104;ENST00000479049;ENST00000468173;ENST00000493767;ENST00000472873;ENST00000475076;ENST00000494501;ENST00000461565;ENST00000487180	dysferlin [Source:HGNC Symbol;Acc:HGNC:3097]	protein_coding;processed_transcript	0.144609	-2.78977	2.25279e-31	down
ENSG00000166396	SERPINB7	ENST00000398019;ENST00000336429;ENST00000425392;ENST00000431370;ENST00000447428;ENST00000540675;ENST00000546027	serpin family B member 7 [Source:HGNC Symbol;Acc:HGNC:13902]	protein_coding	0.144739	-2.78847	7.41112e-05	down
ENSG00000005187	ACSM3	ENST00000614721;ENST00000568235;ENST00000561795;ENST00000569141;ENST00000561584;ENST00000563914;ENST00000289416;ENST00000567387;ENST00000440284;ENST00000501740;ENST00000562251;ENST00000561499;ENST00000567006;ENST00000567711;ENST00000564701	acyl-CoA synthetase medium chain family member 3 [Source:HGNC Symbol;Acc:HGNC:10522]	processed_transcript;protein_coding;retained_intron	0.144863	-2.78724	1.11427e-09	down
ENSG00000111424	VDR	ENST00000395324;ENST00000229022;ENST00000548664;ENST00000549336;ENST00000546653;ENST00000547065;ENST00000550314;ENST00000550325	vitamin D receptor [Source:HGNC Symbol;Acc:HGNC:12679]	protein_coding;nonsense_mediated_decay	0.145132	-2.78456	0.000837388	down
ENSG00000166510	CCDC68	ENST00000591504;ENST00000432185;ENST00000592040;ENST00000592294;ENST00000337363;ENST00000587148	coiled-coil domain containing 68 [Source:HGNC Symbol;Acc:HGNC:24350]	protein_coding;retained_intron	0.145218	-2.7837	1.88342e-07	down
ENSG00000163874	ZC3H12A	ENST00000373087;ENST00000640233;ENST00000472312;ENST00000471012	zinc finger CCCH-type containing 12A [Source:HGNC Symbol;Acc:HGNC:26259]	protein_coding;nonsense_mediated_decay;retained_intron	0.145354	-2.78236	9.01979e-12	down
ENSG00000135926	TMBIM1	ENST00000465082;ENST00000396809;ENST00000258412;ENST00000444183;ENST00000451181;ENST00000492966;ENST00000420341;ENST00000437694;ENST00000429501;ENST00000439306;ENST00000476429;ENST00000444881;ENST00000466012;ENST00000495113;ENST00000425694;ENST00000444000;ENST00000445635;ENST00000434015;ENST00000418569;ENST00000453281;ENST00000413976;ENST00000440422;ENST00000453776	transmembrane BAX inhibitor motif containing 1 [Source:HGNC Symbol;Acc:HGNC:23410]	retained_intron;protein_coding;nonsense_mediated_decay	0.14552	-2.78071	8.65198e-24	down
ENSG00000119139	TJP2	ENST00000636247;ENST00000648087;ENST00000649927;ENST00000377245;ENST00000498204;ENST00000649943;ENST00000650353;ENST00000649114;ENST00000348208;ENST00000423935;ENST00000648402;ENST00000650460;ENST00000636438;ENST00000649134;ENST00000648460;ENST00000377259;ENST00000535702;ENST00000649783;ENST00000650378;ENST00000650522;ENST00000650333;ENST00000647986;ENST00000649939;ENST00000648862;ENST00000648042…	tight junction protein 2 [Source:HGNC Symbol;Acc:HGNC:11828]	retained_intron;protein_coding;nonsense_mediated_decay;processed_transcript	0.147647	-2.75978	1.4777e-52	down
ENSG00000110723	EXPH5	ENST00000265843;ENST00000531386;ENST00000533052;ENST00000524840;ENST00000526312;ENST00000525344	exophilin 5 [Source:HGNC Symbol;Acc:HGNC:30578]	protein_coding	0.147756	-2.75871	5.53894e-15	down
ENSG00000138496	PARP9	ENST00000462315;ENST00000471785;ENST00000489652;ENST00000360356;ENST00000466126;ENST00000477522;ENST00000492382	poly(ADP-ribose) polymerase family member 9 [Source:HGNC Symbol;Acc:HGNC:24118]	protein_coding;retained_intron	0.14786	-2.7577	1.50403e-25	down
ENSG00000148426	PROSER2	ENST00000277570;ENST00000474155;ENST00000379200;ENST00000622831;ENST00000444604	proline and serine rich 2 [Source:HGNC Symbol;Acc:HGNC:23728]	protein_coding;processed_transcript	0.147985	-2.75648	1.09442e-18	down
ENSG00000180875	GREM2	ENST00000318160	gremlin 2, DAN family BMP antagonist [Source:HGNC Symbol;Acc:HGNC:17655]	protein_coding	0.1497	-2.73986	1.65598e-28	down
ENSG00000144452	ABCA12	ENST00000272895;ENST00000389661;ENST00000412081	ATP binding cassette subfamily A member 12 [Source:HGNC Symbol;Acc:HGNC:14637]	protein_coding	0.149819	-2.73871	5.4194e-09	down
ENSG00000026559	KCNG1	ENST00000371571;ENST00000424171;ENST00000506387;ENST00000439216;ENST00000433903;ENST00000447736	potassium voltage-gated channel modifier subfamily G member 1 [Source:HGNC Symbol;Acc:HGNC:6248]	protein_coding;processed_transcript	0.150478	-2.73238	1.06315e-25	down
ENSG00000168394	TAP1	ENST00000645078;ENST00000354258;ENST00000486332;ENST00000643049;ENST00000487296;ENST00000643923	transporter 1, ATP binding cassette subfamily B member [Source:HGNC Symbol;Acc:HGNC:43]	processed_transcript;protein_coding;retained_intron	0.150487	-2.73229	6.88439e-42	down
ENSG00000197461	PDGFA	ENST00000402802;ENST00000482462;ENST00000354513;ENST00000426681;ENST00000405692;ENST00000400761	platelet derived growth factor subunit A [Source:HGNC Symbol;Acc:HGNC:8799]	protein_coding;retained_intron;processed_transcript	0.150507	-2.7321	1.52376e-29	down
ENSG00000106789	CORO2A	ENST00000375077;ENST00000343933	coronin 2A [Source:HGNC Symbol;Acc:HGNC:2255]	protein_coding	0.150537	-2.73181	1.00409e-30	down
ENSG00000151651	ADAM8	ENST00000445355;ENST00000559180;ENST00000559018;ENST00000415217;ENST00000463298;ENST00000537099;ENST00000485491;ENST00000468964;ENST00000561175;ENST00000560135;ENST00000486609	ADAM metallopeptidase domain 8 [Source:HGNC Symbol;Acc:HGNC:215]	protein_coding;processed_transcript;retained_intron;nonsense_mediated_decay	0.15098	-2.72757	8.24985e-17	down
ENSG00000142185	TRPM2	ENST00000397932;ENST00000397928;ENST00000621064;ENST00000431901;ENST00000300481;ENST00000498430;ENST00000490982;ENST00000300482	transient receptor potential cation channel subfamily M member 2 [Source:HGNC Symbol;Acc:HGNC:12339]	protein_coding;processed_transcript	0.151167	-2.72579	0.00293578	down
ENSG00000174500	GCSAM	ENST00000308910;ENST00000470085;ENST00000488580;ENST00000484193;ENST00000487901;ENST00000460387;ENST00000495418	germinal center associated signaling and motility [Source:HGNC Symbol;Acc:HGNC:20253]	protein_coding;nonsense_mediated_decay	0.151315	-2.72437	1.9958e-07	down
ENSG00000181381	DDX60L	ENST00000511577;ENST00000510590;ENST00000260184;ENST00000512958;ENST00000515088;ENST00000505890;ENST00000514748;ENST00000504793;ENST00000512371;ENST00000514580;ENST00000503190;ENST00000513103;ENST00000505696;ENST00000513901;ENST00000505863;ENST00000505150	DExD/H-box 60 like [Source:HGNC Symbol;Acc:HGNC:26429]	protein_coding;retained_intron;processed_transcript	0.151943	-2.7184	1.89468e-12	down
ENSG00000145040	UCN2	ENST00000273610	urocortin 2 [Source:HGNC Symbol;Acc:HGNC:18414]	protein_coding	0.153496	-2.70373	0.00712415	down
ENSG00000136048	DRAM1	ENST00000258534;ENST00000549365;ENST00000546729;ENST00000549066;ENST00000544152;ENST00000614926;ENST00000551403	DNA damage regulated autophagy modulator 1 [Source:HGNC Symbol;Acc:HGNC:25645]	protein_coding;nonsense_mediated_decay;retained_intron	0.153543	-2.70328	5.2127e-10	down
ENSG00000174348	PODN	ENST00000312553;ENST00000371500;ENST00000395871;ENST00000673956;ENST00000490650;ENST00000618387;ENST00000471285;ENST00000673702;ENST00000471210	podocan [Source:HGNC Symbol;Acc:HGNC:23174]	protein_coding;processed_transcript	0.154029	-2.69873	1.00512e-16	down
ENSG00000165685	TMEM52B	ENST00000298530;ENST00000545924;ENST00000546153;ENST00000381923;ENST00000334148;ENST00000543484	transmembrane protein 52B [Source:HGNC Symbol;Acc:HGNC:26438]	protein_coding;processed_transcript;retained_intron	0.155041	-2.68928	0.000247103	down
ENSG00000157601	MX1	ENST00000398600;ENST00000419044;ENST00000455164;ENST00000478268;ENST00000413778;ENST00000486275;ENST00000619682;ENST00000424365;ENST00000484465;ENST00000427464;ENST00000398598;ENST00000467510;ENST00000468506;ENST00000490220;ENST00000288383;ENST00000441677;ENST00000417963;ENST00000491110	MX dynamin like GTPase 1 [Source:HGNC Symbol;Acc:HGNC:7532]	protein_coding;retained_intron;processed_transcript	0.15598	-2.68056	2.89868e-12	down
ENSG00000165118	C9orf64	ENST00000376344;ENST00000314700;ENST00000376340	chromosome 9 open reading frame 64 [Source:HGNC Symbol;Acc:HGNC:28144]	protein_coding	0.156912	-2.67197	0.00237144	down
ENSG00000148175	STOM	ENST00000286713;ENST00000347359;ENST00000538954	stomatin [Source:HGNC Symbol;Acc:HGNC:3383]	protein_coding	0.156932	-2.67179	5.97295e-15	down
ENSG00000136404	TM6SF1	ENST00000564988;ENST00000258909;ENST00000561551;ENST00000322019;ENST00000565982;ENST00000379390;ENST00000379384;ENST00000565774	transmembrane 6 superfamily member 1 [Source:HGNC Symbol;Acc:HGNC:11860]	processed_transcript;nonsense_mediated_decay;protein_coding	0.157048	-2.67072	0.000111551	down
ENSG00000054598	FOXC1	ENST00000645831	forkhead box C1 [Source:HGNC Symbol;Acc:HGNC:3800]	protein_coding	0.157393	-2.66755	2.93897e-10	down
ENSG00000145287	PLAC8	ENST00000509973;ENST00000411416;ENST00000505406;ENST00000426923;ENST00000515389;ENST00000311507	placenta associated 8 [Source:HGNC Symbol;Acc:HGNC:19254]	protein_coding;processed_transcript	0.157563	-2.666	0.00307876	down
ENSG00000125347	IRF1	ENST00000245414;ENST00000472045;ENST00000405885;ENST00000493208;ENST00000439555;ENST00000463784;ENST00000476613;ENST00000613424;ENST00000459982;ENST00000458069;ENST00000437654	interferon regulatory factor 1 [Source:HGNC Symbol;Acc:HGNC:6116]	protein_coding;retained_intron;nonsense_mediated_decay;processed_transcript	0.158351	-2.6588	8.29043e-21	down
ENSG00000107485	GATA3	ENST00000346208;ENST00000379328;ENST00000481743;ENST00000643001;ENST00000461472	GATA binding protein 3 [Source:HGNC Symbol;Acc:HGNC:4172]	protein_coding;processed_transcript	0.158771	-2.65498	4.80024e-38	down
ENSG00000183023	SLC8A1	ENST00000403092;ENST00000406785;ENST00000406391;ENST00000407929;ENST00000408028;ENST00000455476;ENST00000405901;ENST00000332839;ENST00000417271;ENST00000405269;ENST00000402441;ENST00000448531	solute carrier family 8 member A1 [Source:HGNC Symbol;Acc:HGNC:11068]	protein_coding;nonsense_mediated_decay	0.159172	-2.65134	1.2183e-16	down
ENSG00000179750	APOBEC3B	ENST00000333467;ENST00000335760;ENST00000402182;ENST00000407298	apolipoprotein B mRNA editing enzyme catalytic subunit 3B [Source:HGNC Symbol;Acc:HGNC:17352]	protein_coding;nonsense_mediated_decay	0.159564	-2.64779	0.000448873	down
ENSG00000206538	VGLL3	ENST00000398399;ENST00000494229;ENST00000637106;ENST00000383698	vestigial like family member 3 [Source:HGNC Symbol;Acc:HGNC:24327]	protein_coding;nonsense_mediated_decay	0.159986	-2.64399	3.07825e-29	down
ENSG00000119917	IFIT3	ENST00000371818;ENST00000371811	interferon induced protein with tetratricopeptide repeats 3 [Source:HGNC Symbol;Acc:HGNC:5411]	protein_coding	0.161469	-2.63067	6.26862e-05	down
ENSG00000103335	PIEZO1	ENST00000301015;ENST00000484567;ENST00000490756;ENST00000497793;ENST00000419505;ENST00000472168;ENST00000518793;ENST00000495568;ENST00000566414;ENST00000521877;ENST00000474606;ENST00000466823;ENST00000491917;ENST00000327397;ENST00000475586	piezo type mechanosensitive ion channel component 1 [Source:HGNC Symbol;Acc:HGNC:28993]	protein_coding;retained_intron;nonsense_mediated_decay	0.162455	-2.62189	9.96413e-37	down
ENSG00000163932	PRKCD	ENST00000330452;ENST00000394729;ENST00000464818;ENST00000478843;ENST00000652449;ENST00000477794;ENST00000654719;ENST00000650739;ENST00000651505;ENST00000487897;ENST00000650940	protein kinase C delta [Source:HGNC Symbol;Acc:HGNC:9399]	protein_coding;nonsense_mediated_decay	0.163056	-2.61656	2.00031e-25	down
ENSG00000265107	GJA5	ENST00000579774;ENST00000430508;ENST00000621517	gap junction protein alpha 5 [Source:HGNC Symbol;Acc:HGNC:4279]	protein_coding	0.163928	-2.60887	8.64953e-06	down
ENSG00000078269	SYNJ2	ENST00000640338;ENST00000638626;ENST00000355585;ENST00000367113;ENST00000367122;ENST00000367112;ENST00000485863;ENST00000640569;ENST00000449320	synaptojanin 2 [Source:HGNC Symbol;Acc:HGNC:11504]	protein_coding;processed_transcript;nonsense_mediated_decay;retained_intron	0.1648	-2.60121	1.78465e-26	down
ENSG00000113396	SLC27A6	ENST00000262462;ENST00000506176;ENST00000508645;ENST00000395266	solute carrier family 27 member 6 [Source:HGNC Symbol;Acc:HGNC:11000]	protein_coding	0.16502	-2.59929	1.34559e-19	down
ENSG00000284526	AC015802	ENST00000640006	novel protein	protein_coding	0.165747	-2.59295	0.00266556	down
ENSG00000204516	MICB	ENST00000538442;ENST00000252229;ENST00000399150;ENST00000494577	MHC class I polypeptide-related sequence B [Source:HGNC Symbol;Acc:HGNC:7091]	protein_coding;retained_intron	0.165994	-2.5908	9.16033e-15	down
ENSG00000173442	EHBP1L1	ENST00000309295;ENST00000529099;ENST00000529056;ENST00000526990;ENST00000533364;ENST00000533237;ENST00000634639;ENST00000531106;ENST00000533465;ENST00000527214;ENST00000529596	EH domain binding protein 1 like 1 [Source:HGNC Symbol;Acc:HGNC:30682]	protein_coding;processed_transcript;retained_intron	0.166021	-2.59056	9.26945e-18	down
ENSG00000253958	CLDN23	ENST00000519106	claudin 23 [Source:HGNC Symbol;Acc:HGNC:17591]	protein_coding	0.166416	-2.58713	3.56151e-11	down
ENSG00000064218	DMRT3	ENST00000190165;ENST00000417254	doublesex and mab-3 related transcription factor 3 [Source:HGNC Symbol;Acc:HGNC:13909]	protein_coding	0.167186	-2.58047	0.000414513	down
ENSG00000145861	C1QTNF2	ENST00000652664;ENST00000393975	C1q and TNF related 2 [Source:HGNC Symbol;Acc:HGNC:14325]	protein_coding	0.169426	-2.56127	2.03693e-05	down
ENSG00000047365	ARAP2	ENST00000303965;ENST00000505837;ENST00000511416;ENST00000503904;ENST00000512804;ENST00000503225;ENST00000513032;ENST00000618163;ENST00000506189;ENST00000508066	ArfGAP with RhoGAP domain, ankyrin repeat and PH domain 2 [Source:HGNC Symbol;Acc:HGNC:16924]	protein_coding;processed_transcript;retained_intron	0.169856	-2.55761	1.13381e-09	down
ENSG00000128510	CPA4	ENST00000222482;ENST00000497388;ENST00000490117;ENST00000474254;ENST00000473956;ENST00000488025;ENST00000470542;ENST00000445470;ENST00000486598;ENST00000493259;ENST00000492072	carboxypeptidase A4 [Source:HGNC Symbol;Acc:HGNC:15740]	protein_coding;retained_intron;processed_transcript	0.170423	-2.55281	2.95351e-13	down
ENSG00000169894	MUC3A	ENST00000379458;ENST00000614399;ENST00000483366;ENST00000414964	mucin 3A, cell surface associated [Source:HGNC Symbol;Acc:HGNC:7513]	protein_coding;retained_intron;nonsense_mediated_decay	0.170912	-2.54868	2.30611e-06	down
ENSG00000189431	RASSF10	ENST00000529419	Ras association domain family member 10 [Source:HGNC Symbol;Acc:HGNC:33984]	protein_coding	0.171556	-2.54325	0.00275565	down
ENSG00000129538	RNASE1	ENST00000397967;ENST00000397970;ENST00000340900;ENST00000412779;ENST00000555698	ribonuclease A family member 1, pancreatic [Source:HGNC Symbol;Acc:HGNC:10044]	protein_coding	0.171702	-2.54202	5.66192e-05	down
ENSG00000125657	TNFSF9	ENST00000245817	TNF superfamily member 9 [Source:HGNC Symbol;Acc:HGNC:11939]	protein_coding	0.17189	-2.54044	1.62259e-09	down
ENSG00000197044	ZNF441	ENST00000357901;ENST00000462251;ENST00000409902	zinc finger protein 441 [Source:HGNC Symbol;Acc:HGNC:20875]	protein_coding;retained_intron;nonsense_mediated_decay	0.171953	-2.53991	2.72202e-22	down
ENSG00000158089	GALNT14	ENST00000349752;ENST00000486564;ENST00000424136;ENST00000455477;ENST00000461193;ENST00000430167;ENST00000490212;ENST00000324589;ENST00000498206;ENST00000485468;ENST00000475320;ENST00000464038;ENST00000406653;ENST00000496397;ENST00000481023	polypeptide N-acetylgalactosaminyltransferase 14 [Source:HGNC Symbol;Acc:HGNC:22946]	protein_coding;processed_transcript;nonsense_mediated_decay	0.172385	-2.53629	4.91748e-09	down
ENSG00000087253	LPCAT2	ENST00000262134;ENST00000566911;ENST00000566915;ENST00000566375;ENST00000564084;ENST00000562299;ENST00000565056;ENST00000563095	lysophosphatidylcholine acyltransferase 2 [Source:HGNC Symbol;Acc:HGNC:26032]	protein_coding;retained_intron;processed_transcript	0.172812	-2.53272	1.42313e-12	down
ENSG00000050405	LIMA1	ENST00000552783;ENST00000547825;ENST00000549064;ENST00000552823;ENST00000394943;ENST00000341247;ENST00000552491;ENST00000552909;ENST00000550592;ENST00000551486;ENST00000552720;ENST00000552008;ENST00000551691;ENST00000552045;ENST00000550611;ENST00000552338	LIM domain and actin binding 1 [Source:HGNC Symbol;Acc:HGNC:24636]	protein_coding;retained_intron;nonsense_mediated_decay;processed_transcript	0.172935	-2.5317	1.35355e-27	down
ENSG00000115828	QPCT	ENST00000338415;ENST00000650442;ENST00000444022;ENST00000404976;ENST00000469098;ENST00000480050;ENST00000470075	glutaminyl-peptide cyclotransferase [Source:HGNC Symbol;Acc:HGNC:9753]	protein_coding;retained_intron	0.17396	-2.52318	1.26668e-09	down
ENSG00000165929	TC2N	ENST00000435962;ENST00000556018;ENST00000360594;ENST00000555302;ENST00000556590;ENST00000340892;ENST00000554424	tandem C2 domains, nuclear [Source:HGNC Symbol;Acc:HGNC:19859]	protein_coding;processed_transcript;retained_intron	0.174501	-2.51869	7.70046e-12	down
ENSG00000135899	SP110	ENST00000258382;ENST00000258381;ENST00000358662;ENST00000486146;ENST00000455674;ENST00000489597;ENST00000490880;ENST00000477068;ENST00000480916;ENST00000540870;ENST00000483067;ENST00000462232;ENST00000463022;ENST00000392048;ENST00000409815	SP110 nuclear body protein [Source:HGNC Symbol;Acc:HGNC:5401]	protein_coding;processed_transcript;retained_intron	0.175	-2.51457	1.34404e-07	down
ENSG00000104881	PPP1R13L	ENST00000360957;ENST00000587270;ENST00000418234;ENST00000585905;ENST00000591986;ENST00000592134;ENST00000589858;ENST00000593226;ENST00000589371	protein phosphatase 1 regulatory subunit 13 like [Source:HGNC Symbol;Acc:HGNC:18838]	protein_coding;retained_intron	0.175433	-2.51101	3.34373e-27	down
ENSG00000147883	CDKN2B	ENST00000276925;ENST00000380142;ENST00000579591	cyclin dependent kinase inhibitor 2B [Source:HGNC Symbol;Acc:HGNC:1788]	protein_coding;retained_intron	0.175669	-2.50907	4.29637e-30	down
ENSG00000276547	PCDHGB5	ENST00000621169;ENST00000617380	protocadherin gamma subfamily B, 5 [Source:HGNC Symbol;Acc:HGNC:8712]	protein_coding	0.175713	-2.50871	3.38546e-05	down
ENSG00000139044	B4GALNT3	ENST00000535402;ENST00000266383;ENST00000322843;ENST00000647602;ENST00000535680;ENST00000544638;ENST00000540836	beta-1,4-N-acetyl-galactosaminyltransferase 3 [Source:HGNC Symbol;Acc:HGNC:24137]	retained_intron;protein_coding;processed_transcript	0.175774	-2.50821	2.17386e-19	down
ENSG00000162458	FBLIM1	ENST00000509138;ENST00000375766;ENST00000441801;ENST00000332305;ENST00000431771;ENST00000430076;ENST00000508310;ENST00000375771;ENST00000502739;ENST00000510929;ENST00000483633;ENST00000510393;ENST00000496928;ENST00000514156;ENST00000502638	filamin binding LIM protein 1 [Source:HGNC Symbol;Acc:HGNC:24686]	processed_transcript;protein_coding	0.176034	-2.50608	1.57274e-13	down
ENSG00000137078	SIT1	ENST00000486859;ENST00000618781;ENST00000474403;ENST00000259608	signaling threshold regulating transmembrane adaptor 1 [Source:HGNC Symbol;Acc:HGNC:17710]	processed_transcript;protein_coding	0.176159	-2.50505	6.46035e-06	down
ENSG00000163293	NIPAL1	ENST00000295461;ENST00000511852;ENST00000511123;ENST00000508180;ENST00000500571;ENST00000513724	NIPA like domain containing 1 [Source:HGNC Symbol;Acc:HGNC:27194]	protein_coding;nonsense_mediated_decay;processed_transcript	0.17634	-2.50357	4.85632e-13	down
ENSG00000074370	ATP2A3	ENST00000309890;ENST00000576957;ENST00000397035;ENST00000570773;ENST00000397041;ENST00000574202;ENST00000571245;ENST00000572116;ENST00000397043;ENST00000352011;ENST00000359983;ENST00000572694;ENST00000572176;ENST00000574999;ENST00000570845	ATPase sarcoplasmic/endoplasmic reticulum Ca2+ transporting 3 [Source:HGNC Symbol;Acc:HGNC:813]	protein_coding;retained_intron	0.176873	-2.49922	3.17818e-08	down
ENSG00000005108	THSD7A	ENST00000617773;ENST00000408005;ENST00000423059;ENST00000497575;ENST00000480061	thrombospondin type 1 domain containing 7A [Source:HGNC Symbol;Acc:HGNC:22207]	protein_coding;retained_intron;processed_transcript	0.177233	-2.49628	9.04355e-44	down
ENSG00000135378	PRRG4	ENST00000257836	proline rich and Gla domain 4 [Source:HGNC Symbol;Acc:HGNC:30799]	protein_coding	0.177283	-2.49587	1.2052e-06	down
ENSG00000164251	F2RL1	ENST00000296677;ENST00000514165	F2R like trypsin receptor 1 [Source:HGNC Symbol;Acc:HGNC:3538]	protein_coding	0.177538	-2.4938	5.1664e-25	down
ENSG00000176092	CRYBG2	ENST00000475866;ENST00000308182;ENST00000429942;ENST00000522923;ENST00000374207;ENST00000520372;ENST00000640960;ENST00000374208;ENST00000522993;ENST00000527815;ENST00000374211	crystallin beta-gamma domain containing 2 [Source:HGNC Symbol;Acc:HGNC:17295]	protein_coding;processed_transcript;nonsense_mediated_decay;retained_intron	0.178415	-2.48669	3.40378e-25	down
ENSG00000113209	PCDHB5	ENST00000231134;ENST00000623915	protocadherin beta 5 [Source:HGNC Symbol;Acc:HGNC:8690]	protein_coding	0.179797	-2.47556	6.89561e-07	down
ENSG00000164853	UNCX	ENST00000316333	UNC homeobox [Source:HGNC Symbol;Acc:HGNC:33194]	protein_coding	0.180165	-2.47261	9.05628e-15	down
ENSG00000181649	PHLDA2	ENST00000314222	pleckstrin homology like domain family A member 2 [Source:HGNC Symbol;Acc:HGNC:12385]	protein_coding	0.1809	-2.46673	7.88279e-08	down
ENSG00000182836	PLCXD3	ENST00000377801;ENST00000328457	phosphatidylinositol specific phospholipase C X domain containing 3 [Source:HGNC Symbol;Acc:HGNC:31822]	protein_coding	0.180971	-2.46617	4.80618e-29	down
ENSG00000100593	ISM2	ENST00000342219;ENST00000471734;ENST00000487738;ENST00000472744;ENST00000493585;ENST00000480979;ENST00000216481;ENST00000554801	isthmin 2 [Source:HGNC Symbol;Acc:HGNC:23176]	protein_coding;nonsense_mediated_decay;retained_intron	0.181099	-2.46515	4.84626e-09	down
ENSG00000182256	GABRG3	ENST00000615808;ENST00000555083;ENST00000451330;ENST00000554786;ENST00000554696;ENST00000557596;ENST00000333743;ENST00000553440	gamma-aminobutyric acid type A receptor subunit gamma3 [Source:HGNC Symbol;Acc:HGNC:4088]	protein_coding;processed_transcript;retained_intron	0.181124	-2.46495	0.00267073	down
ENSG00000160932	LY6E	ENST00000521182;ENST00000520466;ENST00000519546;ENST00000292494;ENST00000429120;ENST00000521003;ENST00000521699;ENST00000519611;ENST00000520531;ENST00000519615;ENST00000522024;ENST00000517503;ENST00000523847;ENST00000522528;ENST00000522971	lymphocyte antigen 6 family member E [Source:HGNC Symbol;Acc:HGNC:6727]	protein_coding;processed_transcript	0.183353	-2.4473	1.48738e-24	down
ENSG00000240563	L1TD1	ENST00000498273	LINE1 type transposase domain containing 1 [Source:HGNC Symbol;Acc:HGNC:25595]	protein_coding	0.184628	-2.43731	2.35191e-10	down
ENSG00000101276	SLC52A3	ENST00000381944;ENST00000217254;ENST00000676154;ENST00000675466;ENST00000675066;ENST00000473664;ENST00000488495;ENST00000645534;ENST00000674666	solute carrier family 52 member 3 [Source:HGNC Symbol;Acc:HGNC:16187]	protein_coding;processed_transcript	0.185314	-2.43196	0.0244945	down
ENSG00000064763	FAR2	ENST00000536681;ENST00000547411;ENST00000547116;ENST00000547759;ENST00000551451;ENST00000550541;ENST00000549080;ENST00000551193;ENST00000182377;ENST00000552137	fatty acyl-CoA reductase 2 [Source:HGNC Symbol;Acc:HGNC:25531]	protein_coding;processed_transcript;nonsense_mediated_decay	0.186537	-2.42247	3.29143e-17	down
ENSG00000100628	ASB2	ENST00000555019;ENST00000315988;ENST00000553883;ENST00000557613;ENST00000555507;ENST00000555374;ENST00000556062;ENST00000556793;ENST00000555287;ENST00000556337	ankyrin repeat and SOCS box containing 2 [Source:HGNC Symbol;Acc:HGNC:16012]	protein_coding;retained_intron;processed_transcript	0.187227	-2.41714	5.30569e-13	down
ENSG00000148677	ANKRD1	ENST00000371697	ankyrin repeat domain 1 [Source:HGNC Symbol;Acc:HGNC:15819]	protein_coding	0.188492	-2.40742	1.0298e-31	down
ENSG00000129354	AP1M2	ENST00000590923;ENST00000250244;ENST00000591240;ENST00000589348;ENST00000587069;ENST00000589571;ENST00000591676;ENST00000589809;ENST00000592285;ENST00000589684	adaptor related protein complex 1 subunit mu 2 [Source:HGNC Symbol;Acc:HGNC:558]	protein_coding;nonsense_mediated_decay;retained_intron	0.189175	-2.40221	1.65908e-22	down
ENSG00000131459	GFPT2	ENST00000253778;ENST00000518158;ENST00000518185;ENST00000520165;ENST00000503228;ENST00000510122;ENST00000518906;ENST00000503546	glutamine-fructose-6-phosphate transaminase 2 [Source:HGNC Symbol;Acc:HGNC:4242]	protein_coding;retained_intron;processed_transcript	0.189334	-2.401	6.82295e-22	down
ENSG00000108576	SLC6A4	ENST00000394821;ENST00000578609;ENST00000650711;ENST00000261707;ENST00000401766;ENST00000579221	solute carrier family 6 member 4 [Source:HGNC Symbol;Acc:HGNC:11050]	protein_coding;retained_intron;nonsense_mediated_decay	0.18963	-2.39874	0.00308352	down
ENSG00000124839	RAB17	ENST00000392001;ENST00000466244;ENST00000477149;ENST00000414278;ENST00000264601;ENST00000409576;ENST00000487008;ENST00000416106;ENST00000411462;ENST00000430445;ENST00000409822	RAB17, member RAS oncogene family [Source:HGNC Symbol;Acc:HGNC:16523]	nonsense_mediated_decay;retained_intron;protein_coding;processed_transcript	0.189675	-2.3984	1.08474e-13	down
ENSG00000111913	RIPOR2	ENST00000378023;ENST00000540914;ENST00000647136;ENST00000644621;ENST00000644411;ENST00000259698;ENST00000643898;ENST00000606385;ENST00000538035;ENST00000645100;ENST00000473070;ENST00000463828;ENST00000613507;ENST00000643623;ENST00000647309;ENST00000510784;ENST00000645703	RHO family interacting cell polarization regulator 2 [Source:HGNC Symbol;Acc:HGNC:13872]	protein_coding;processed_transcript;retained_intron	0.190156	-2.39474	6.74224e-33	down
ENSG00000166016	ABTB2	ENST00000435224;ENST00000530814	ankyrin repeat and BTB domain containing 2 [Source:HGNC Symbol;Acc:HGNC:23842]	protein_coding;processed_transcript	0.190938	-2.38882	6.30585e-23	down
ENSG00000132698	RAB25	ENST00000487325;ENST00000361084;ENST00000473336;ENST00000463614;ENST00000497968	RAB25, member RAS oncogene family [Source:HGNC Symbol;Acc:HGNC:18238]	processed_transcript;protein_coding	0.19095	-2.38873	1.16022e-13	down
ENSG00000168743	NPNT	ENST00000379987;ENST00000506056;ENST00000514632;ENST00000505917;ENST00000427316;ENST00000504787;ENST00000504304;ENST00000514837;ENST00000453617;ENST00000305572;ENST00000503451;ENST00000506666;ENST00000511518;ENST00000514622;ENST00000513430;ENST00000505821	nephronectin [Source:HGNC Symbol;Acc:HGNC:27405]	protein_coding;retained_intron;processed_transcript	0.190956	-2.38868	1.93442e-06	down
ENSG00000185022	MAFF	ENST00000338483;ENST00000538999;ENST00000426621;ENST00000538320;ENST00000441709;ENST00000417948;ENST00000407965;ENST00000624676	MAF bZIP transcription factor F [Source:HGNC Symbol;Acc:HGNC:6780]	protein_coding;retained_intron	0.191233	-2.38659	4.00233e-13	down
ENSG00000080166	DCT	ENST00000377028;ENST00000483392;ENST00000446125;ENST00000472871;ENST00000490854	dopachrome tautomerase [Source:HGNC Symbol;Acc:HGNC:2709]	protein_coding;nonsense_mediated_decay;retained_intron;processed_transcript	0.191441	-2.38503	3.3372e-09	down
ENSG00000239713	APOBEC3G	ENST00000480000;ENST00000486357;ENST00000461827;ENST00000407997;ENST00000463934;ENST00000481958;ENST00000494150	apolipoprotein B mRNA editing enzyme catalytic subunit 3G [Source:HGNC Symbol;Acc:HGNC:17357]	retained_intron;processed_transcript;protein_coding	0.192095	-2.38011	0.000243631	down
ENSG00000185559	DLK1	ENST00000341267;ENST00000555747;ENST00000331224;ENST00000556051;ENST00000392848	delta like non-canonical Notch ligand 1 [Source:HGNC Symbol;Acc:HGNC:2907]	protein_coding;retained_intron	0.192252	-2.37893	6.79931e-39	down
ENSG00000125730	C3	ENST00000245907;ENST00000602229;ENST00000596179;ENST00000601008;ENST00000594936;ENST00000600744;ENST00000601475;ENST00000600763;ENST00000598805;ENST00000599899;ENST00000602053;ENST00000599668;ENST00000596548;ENST00000594270;ENST00000595577;ENST00000596238;ENST00000594005;ENST00000597442	complement C3 [Source:HGNC Symbol;Acc:HGNC:1318]	protein_coding;retained_intron;processed_transcript	0.192394	-2.37786	8.37996e-05	down
ENSG00000144824	PHLDB2	ENST00000393923;ENST00000481953;ENST00000431670;ENST00000412622;ENST00000498699;ENST00000640905;ENST00000495180;ENST00000640181;ENST00000486886;ENST00000393925;ENST00000478584;ENST00000477695;ENST00000460365;ENST00000478733;ENST00000638331;ENST00000470699;ENST00000478922;ENST00000491694	pleckstrin homology like domain family B member 2 [Source:HGNC Symbol;Acc:HGNC:29573]	protein_coding;processed_transcript;retained_intron	0.192433	-2.37757	2.66517e-31	down
ENSG00000173559	NABP1	ENST00000674187;ENST00000674172;ENST00000410026;ENST00000425611;ENST00000462712;ENST00000307834;ENST00000451500;ENST00000307849;ENST00000409510;ENST00000674360;ENST00000491331;ENST00000674406;ENST00000674414;ENST00000462824;ENST00000674262;ENST00000435931	nucleic acid binding protein 1 [Source:HGNC Symbol;Acc:HGNC:26232]	nonsense_mediated_decay;protein_coding;retained_intron	0.192469	-2.37731	2.95539e-27	down
ENSG00000111057	KRT18	ENST00000550600;ENST00000388835;ENST00000549078;ENST00000548496;ENST00000546656;ENST00000548015;ENST00000388837	keratin 18 [Source:HGNC Symbol;Acc:HGNC:6430]	protein_coding;retained_intron	0.193909	-2.36655	1.07489e-43	down
ENSG00000262655	SPON1	ENST00000576479;ENST00000591785	spondin 1 [Source:HGNC Symbol;Acc:HGNC:11252]	protein_coding;retained_intron	0.195343	-2.35592	4.59952e-29	down
ENSG00000006116	CACNG3	ENST00000005284	calcium voltage-gated channel auxiliary subunit gamma 3 [Source:HGNC Symbol;Acc:HGNC:1407]	protein_coding	0.196095	-2.35038	6.86113e-09	down
ENSG00000154274	C4orf19	ENST00000381980;ENST00000284437;ENST00000508175	chromosome 4 open reading frame 19 [Source:HGNC Symbol;Acc:HGNC:25618]	protein_coding	0.196483	-2.34752	1.19921e-12	down
ENSG00000185585	OLFML2A	ENST00000373580;ENST00000331715;ENST00000288815	olfactomedin like 2A [Source:HGNC Symbol;Acc:HGNC:27270]	protein_coding	0.196754	-2.34553	1.00553e-21	down
ENSG00000143375	CGN	ENST00000271636;ENST00000473377;ENST00000505188;ENST00000467998;ENST00000464886;ENST00000502442;ENST00000427934;ENST00000416743	cingulin [Source:HGNC Symbol;Acc:HGNC:17429]	protein_coding;retained_intron	0.197332	-2.34131	6.36904e-36	down
ENSG00000105971	CAV2	ENST00000222693;ENST00000477018;ENST00000485561;ENST00000490906;ENST00000462876;ENST00000472470;ENST00000465451;ENST00000498493;ENST00000343213;ENST00000460222;ENST00000495841;ENST00000484871;ENST00000478226;ENST00000393480;ENST00000467035	caveolin 2 [Source:HGNC Symbol;Acc:HGNC:1528]	protein_coding;processed_transcript	0.198294	-2.33429	4.98018e-13	down
ENSG00000118503	TNFAIP3	ENST00000620204;ENST00000237289;ENST00000612899;ENST00000615468;ENST00000420009;ENST00000619035;ENST00000485192;ENST00000621150;ENST00000614035;ENST00000433680;ENST00000421450	TNF alpha induced protein 3 [Source:HGNC Symbol;Acc:HGNC:11896]	protein_coding;processed_transcript	0.198809	-2.33055	1.43931e-20	down
ENSG00000186470	BTN3A2	ENST00000377708;ENST00000604202;ENST00000508906;ENST00000530653;ENST00000356386;ENST00000396948;ENST00000396934;ENST00000524682;ENST00000528222;ENST00000532865;ENST00000527422;ENST00000527639;ENST00000527417;ENST00000528541;ENST00000531055;ENST00000532294;ENST00000524459;ENST00000532627;ENST00000532994	butyrophilin subfamily 3 member A2 [Source:HGNC Symbol;Acc:HGNC:1139]	protein_coding;retained_intron;processed_transcript;nonsense_mediated_decay	0.198945	-2.32956	0.000514015	down
ENSG00000069812	HES2	ENST00000377834;ENST00000487437;ENST00000377837;ENST00000471190;ENST00000489730;ENST00000377836	hes family bHLH transcription factor 2 [Source:HGNC Symbol;Acc:HGNC:16005]	protein_coding;processed_transcript	0.199317	-2.32686	0.0117058	down
ENSG00000153064	BANK1	ENST00000508653;ENST00000322953;ENST00000504592;ENST00000444316;ENST00000510950;ENST00000428908;ENST00000504403;ENST00000502990	B cell scaffold protein with ankyrin repeats 1 [Source:HGNC Symbol;Acc:HGNC:18233]	protein_coding;processed_transcript;retained_intron	0.200265	-2.32002	3.72393e-07	down
ENSG00000069399	BCL3	ENST00000164227;ENST00000473473;ENST00000403534;ENST00000464319;ENST00000444487;ENST00000477832;ENST00000487394;ENST00000474300;ENST00000473468	BCL3 transcription coactivator [Source:HGNC Symbol;Acc:HGNC:998]	protein_coding;retained_intron;processed_transcript	0.202061	-2.30714	0.000778174	down
ENSG00000159176	CSRP1	ENST00000533402;ENST00000532313;ENST00000481851;ENST00000367306;ENST00000340006;ENST00000527662;ENST00000471596;ENST00000526317;ENST00000526256;ENST00000526723;ENST00000527573;ENST00000533188;ENST00000530120;ENST00000524951;ENST00000533432;ENST00000529975;ENST00000532460;ENST00000531916;ENST00000458271	cysteine and glycine rich protein 1 [Source:HGNC Symbol;Acc:HGNC:2469]	retained_intron;protein_coding;processed_transcript	0.202253	-2.30577	6.70646e-36	down
ENSG00000137203	TFAP2A	ENST00000489805;ENST00000488193;ENST00000478375;ENST00000379613;ENST00000379608;ENST00000498450;ENST00000486038;ENST00000475264;ENST00000497266;ENST00000462727;ENST00000464323;ENST00000466073;ENST00000482890;ENST00000473652;ENST00000490875;ENST00000461628;ENST00000474952;ENST00000319516;ENST00000465858	transcription factor AP-2 alpha [Source:HGNC Symbol;Acc:HGNC:11742]	nonsense_mediated_decay;retained_intron;protein_coding;processed_transcript	0.202767	-2.3021	5.33809e-22	down
ENSG00000163701	IL17RE	ENST00000489181;ENST00000454190;ENST00000383814;ENST00000383815;ENST00000480244;ENST00000483258;ENST00000461534;ENST00000434065;ENST00000444427;ENST00000454992;ENST00000421412	interleukin 17 receptor E [Source:HGNC Symbol;Acc:HGNC:18439]	retained_intron;protein_coding;nonsense_mediated_decay	0.203111	-2.29966	3.23708e-09	down
ENSG00000089327	FXYD5	ENST00000541435;ENST00000392219;ENST00000590686;ENST00000423817;ENST00000342879;ENST00000592290;ENST00000392218;ENST00000586925;ENST00000588699;ENST00000392217;ENST00000496493;ENST00000543307;ENST00000591716	FXYD domain containing ion transport regulator 5 [Source:HGNC Symbol;Acc:HGNC:4029]	protein_coding;nonsense_mediated_decay;processed_transcript	0.203355	-2.29793	1.29604e-12	down
ENSG00000114279	FGF12	ENST00000445105;ENST00000454309;ENST00000491636;ENST00000448795;ENST00000466144;ENST00000430714;ENST00000450716;ENST00000418610;ENST00000440901	fibroblast growth factor 12 [Source:HGNC Symbol;Acc:HGNC:3668]	protein_coding;retained_intron;processed_transcript	0.203961	-2.29364	1.17668e-16	down
ENSG00000165626	BEND7	ENST00000440282;ENST00000341083;ENST00000466271;ENST00000492675;ENST00000486542;ENST00000463303;ENST00000469555;ENST00000480703;ENST00000378605;ENST00000649551	BEN domain containing 7 [Source:HGNC Symbol;Acc:HGNC:23514]	protein_coding;processed_transcript;non_stop_decay	0.204154	-2.29227	2.47332e-25	down
ENSG00000115616	SLC9A2	ENST00000233969;ENST00000469286;ENST00000467657	solute carrier family 9 member A2 [Source:HGNC Symbol;Acc:HGNC:11072]	protein_coding;processed_transcript;retained_intron	0.204287	-2.29133	0.000613634	down
ENSG00000078401	EDN1	ENST00000379375	endothelin 1 [Source:HGNC Symbol;Acc:HGNC:3176]	protein_coding	0.204425	-2.29036	4.47469e-23	down
ENSG00000164220	F2RL2	ENST00000296641;ENST00000504899	coagulation factor II thrombin receptor like 2 [Source:HGNC Symbol;Acc:HGNC:3539]	protein_coding	0.204972	-2.2865	2.16007e-11	down
ENSG00000075407	ZNF37A	ENST00000361085;ENST00000351773;ENST00000479469;ENST00000477790;ENST00000638053;ENST00000498773	zinc finger protein 37A [Source:HGNC Symbol;Acc:HGNC:13102]	protein_coding;processed_transcript	0.205058	-2.28589	1.80451e-24	down
ENSG00000122367	LDB3	ENST00000361373;ENST00000372066;ENST00000372056;ENST00000542786;ENST00000623056;ENST00000429277;ENST00000263066;ENST00000623007;ENST00000477489	LIM domain binding 3 [Source:HGNC Symbol;Acc:HGNC:15710]	protein_coding;nonsense_mediated_decay	0.205175	-2.28508	1.34256e-07	down
ENSG00000136068	FLNB	ENST00000429972;ENST00000295956;ENST00000481470;ENST00000419752;ENST00000490882;ENST00000477629;ENST00000491408;ENST00000358537;ENST00000468939;ENST00000493452;ENST00000466455;ENST00000484981;ENST00000470231;ENST00000475487	filamin B [Source:HGNC Symbol;Acc:HGNC:3755]	protein_coding;retained_intron;processed_transcript;nonsense_mediated_decay	0.205493	-2.28284	4.60585e-33	down
ENSG00000139926	FRMD6	ENST00000554167;ENST00000395718;ENST00000555936;ENST00000344768;ENST00000555197;ENST00000554778;ENST00000554495;ENST00000557522;ENST00000557405;ENST00000555703;ENST00000556137;ENST00000554745;ENST00000557103;ENST00000557183;ENST00000557001;ENST00000356218;ENST00000553556;ENST00000555952	FERM domain containing 6 [Source:HGNC Symbol;Acc:HGNC:19839]	retained_intron;protein_coding;processed_transcript	0.205556	-2.28239	1.54835e-32	down
ENSG00000092421	SEMA6A	ENST00000343348;ENST00000513137;ENST00000514316;ENST00000257414;ENST00000515129;ENST00000515009;ENST00000509665;ENST00000503962;ENST00000506114;ENST00000510263;ENST00000502996;ENST00000503865;ENST00000503402;ENST00000510024;ENST00000512156	semaphorin 6A [Source:HGNC Symbol;Acc:HGNC:10738]	protein_coding;processed_transcript;retained_intron	0.206427	-2.2763	4.45397e-40	down
ENSG00000176563	CNTD1	ENST00000588408;ENST00000592166;ENST00000585355;ENST00000591559;ENST00000315066;ENST00000586652;ENST00000588527	cyclin N-terminal domain containing 1 [Source:HGNC Symbol;Acc:HGNC:26847]	protein_coding;nonsense_mediated_decay;processed_transcript	0.206658	-2.27468	0.0457786	down
ENSG00000137869	CYP19A1	ENST00000396402;ENST00000557858;ENST00000559653;ENST00000405913;ENST00000453807;ENST00000490076;ENST00000492852;ENST00000559646;ENST00000439712;ENST00000557934;ENST00000561066;ENST00000559878;ENST00000558328;ENST00000478421;ENST00000613097;ENST00000559980;ENST00000561075;ENST00000396404;ENST00000405011;ENST00000558066	cytochrome P450 family 19 subfamily A member 1 [Source:HGNC Symbol;Acc:HGNC:2594]	protein_coding;retained_intron;processed_transcript;non_stop_decay	0.206758	-2.27398	1.66838e-06	down
ENSG00000106366	SERPINE1	ENST00000223095	serpin family E member 1 [Source:HGNC Symbol;Acc:HGNC:8583]	protein_coding	0.206906	-2.27295	1.78413e-34	down
ENSG00000189067	LITAF	ENST00000571688;ENST00000622633;ENST00000570904;ENST00000574848;ENST00000573332;ENST00000574701;ENST00000571976;ENST00000571459;ENST00000571627;ENST00000576036;ENST00000576334;ENST00000574703;ENST00000574763;ENST00000575426;ENST00000571277;ENST00000572255;ENST00000413364;ENST00000570798;ENST00000339430	lipopolysaccharide induced TNF factor [Source:HGNC Symbol;Acc:HGNC:16841]	protein_coding;nonsense_mediated_decay	0.208595	-2.26122	1.21007e-30	down
ENSG00000119888	EPCAM	ENST00000263735;ENST00000490733;ENST00000419334;ENST00000405271;ENST00000456133;ENST00000474691	epithelial cell adhesion molecule [Source:HGNC Symbol;Acc:HGNC:11529]	protein_coding;retained_intron;nonsense_mediated_decay	0.20932	-2.25622	1.23288e-31	down
ENSG00000170006	TMEM154	ENST00000304385;ENST00000613578;ENST00000504064;ENST00000510252	transmembrane protein 154 [Source:HGNC Symbol;Acc:HGNC:26489]	protein_coding;retained_intron	0.21026	-2.24975	1.85731e-05	down
ENSG00000250021	ARPIN-AP3S2	ENST00000398333;ENST00000560224;ENST00000558648;ENST00000559629	ARPIN-AP3S2 readthrough [Source:HGNC Symbol;Acc:HGNC:38824]	protein_coding;processed_transcript	0.210513	-2.24802	0.0192749	down
ENSG00000163251	FZD5	ENST00000295417	frizzled class receptor 5 [Source:HGNC Symbol;Acc:HGNC:4043]	protein_coding	0.210748	-2.24641	6.82358e-28	down
ENSG00000152229	PSTPIP2	ENST00000409746;ENST00000588801;ENST00000591729;ENST00000589328;ENST00000587042;ENST00000593086	proline-serine-threonine phosphatase interacting protein 2 [Source:HGNC Symbol;Acc:HGNC:9581]	protein_coding;processed_transcript;retained_intron	0.210972	-2.24487	4.46352e-23	down
ENSG00000104856	RELB	ENST00000505236;ENST00000625761;ENST00000221452;ENST00000509229;ENST00000509480;ENST00000589972;ENST00000510184	RELB proto-oncogene, NF-kB subunit [Source:HGNC Symbol;Acc:HGNC:9956]	protein_coding;retained_intron;nonsense_mediated_decay	0.211309	-2.24257	8.44289e-13	down
ENSG00000171540	OTP	ENST00000515716;ENST00000306422	orthopedia homeobox [Source:HGNC Symbol;Acc:HGNC:8518]	processed_transcript;protein_coding	0.212695	-2.23314	1.7918e-12	down
ENSG00000115461	IGFBP5	ENST00000233813;ENST00000449583;ENST00000486341	insulin like growth factor binding protein 5 [Source:HGNC Symbol;Acc:HGNC:5474]	protein_coding;retained_intron	0.21318	-2.22986	1.36179e-37	down
ENSG00000235750	KIAA0040	ENST00000444639;ENST00000423313;ENST00000619513;ENST00000567124;ENST00000563563;ENST00000545251	KIAA0040 [Source:HGNC Symbol;Acc:HGNC:28950]	protein_coding;processed_transcript	0.214378	-2.22177	5.5309e-19	down
ENSG00000117152	RGS4	ENST00000367909;ENST00000421743;ENST00000491263;ENST00000528938;ENST00000531057;ENST00000527393;ENST00000367908;ENST00000533019;ENST00000367906;ENST00000527809	regulator of G protein signaling 4 [Source:HGNC Symbol;Acc:HGNC:10000]	protein_coding;processed_transcript	0.215139	-2.21666	7.81166e-06	down
ENSG00000106038	EVX1	ENST00000496902;ENST00000222761;ENST00000518886;ENST00000580535	even-skipped homeobox 1 [Source:HGNC Symbol;Acc:HGNC:3506]	protein_coding;processed_transcript	0.21668	-2.20636	9.80971e-09	down
ENSG00000141682	PMAIP1	ENST00000316660;ENST00000269518;ENST00000590596	phorbol-12-myristate-13-acetate-induced protein 1 [Source:HGNC Symbol;Acc:HGNC:9108]	protein_coding;retained_intron	0.216798	-2.20558	3.06497e-10	down
ENSG00000134317	GRHL1	ENST00000324907;ENST00000405379;ENST00000464418;ENST00000480736;ENST00000472167;ENST00000497403;ENST00000494520;ENST00000439493	grainyhead like transcription factor 1 [Source:HGNC Symbol;Acc:HGNC:17923]	protein_coding;nonsense_mediated_decay;retained_intron	0.216832	-2.20535	4.59011e-15	down
ENSG00000236699	ARHGEF38	ENST00000265154;ENST00000420470;ENST00000508961;ENST00000506828;ENST00000510406;ENST00000503289;ENST00000508036	Rho guanine nucleotide exchange factor 38 [Source:HGNC Symbol;Acc:HGNC:25968]	protein_coding;processed_transcript	0.217229	-2.20271	0.000876349	down
ENSG00000261678	SCRT1	ENST00000569446	scratch family transcriptional repressor 1 [Source:HGNC Symbol;Acc:HGNC:15950]	protein_coding	0.218104	-2.19691	8.89674e-18	down
ENSG00000119699	TGFB3	ENST00000556285;ENST00000554980;ENST00000556674;ENST00000238682;ENST00000555193;ENST00000556507;ENST00000557493	transforming growth factor beta 3 [Source:HGNC Symbol;Acc:HGNC:11769]	protein_coding;retained_intron;processed_transcript	0.218386	-2.19505	4.96702e-05	down
ENSG00000138623	SEMA7A	ENST00000543145;ENST00000261918;ENST00000569617;ENST00000542748	semaphorin 7A (John Milton Hagen blood group) [Source:HGNC Symbol;Acc:HGNC:10741]	protein_coding;retained_intron	0.21885	-2.19198	1.50979e-26	down
ENSG00000114251	WNT5A	ENST00000264634;ENST00000493406;ENST00000497027;ENST00000624674;ENST00000482079;ENST00000474267;ENST00000497817	Wnt family member 5A [Source:HGNC Symbol;Acc:HGNC:12784]	protein_coding;processed_transcript;retained_intron	0.219216	-2.18958	5.75957e-11	down
ENSG00000231852	CYP21A2	ENST00000469053;ENST00000486063;ENST00000478281;ENST00000479730;ENST00000466779;ENST00000466879;ENST00000462278;ENST00000483041;ENST00000480027;ENST00000464325;ENST00000471671;ENST00000435122;ENST00000479074;ENST00000488465;ENST00000644719	cytochrome P450 family 21 subfamily A member 2 [Source:HGNC Symbol;Acc:HGNC:2600]	nonsense_mediated_decay;retained_intron;protein_coding	0.219437	-2.18812	0.00229821	down
ENSG00000166750	SLFN5	ENST00000299977;ENST00000542451;ENST00000592325	schlafen family member 5 [Source:HGNC Symbol;Acc:HGNC:28286]	protein_coding	0.220272	-2.18264	3.09792e-06	down
ENSG00000168398	BDKRB2	ENST00000554311;ENST00000542454;ENST00000539359	bradykinin receptor B2 [Source:HGNC Symbol;Acc:HGNC:1030]	protein_coding	0.220732	-2.17963	0.000243631	down
ENSG00000082293	COL19A1	ENST00000620364;ENST00000483745;ENST00000455415;ENST00000476656;ENST00000478620	collagen type XIX alpha 1 chain [Source:HGNC Symbol;Acc:HGNC:2196]	protein_coding;processed_transcript	0.221644	-2.17368	0.00052361	down
ENSG00000165124	SVEP1	ENST00000401783;ENST00000374469;ENST00000374461;ENST00000467821;ENST00000476205	sushi, von Willebrand factor type A, EGF and pentraxin domain containing 1 [Source:HGNC Symbol;Acc:HGNC:15985]	protein_coding;processed_transcript	0.222199	-2.17007	1.70181e-10	down
ENSG00000082497	SERTAD4	ENST00000367012;ENST00000490620;ENST00000483884;ENST00000482421	SERTA domain containing 4 [Source:HGNC Symbol;Acc:HGNC:25236]	protein_coding;processed_transcript	0.222802	-2.16616	1.7498e-19	down
ENSG00000254536	AL360181	ENST00000664059;ENST00000670407;ENST00000468317	novel protein	retained_intron;nonsense_mediated_decay	0.22342	-2.16217	0.00104889	down
ENSG00000169991	IFFO2	ENST00000455833;ENST00000416166;ENST00000355609	intermediate filament family orphan 2 [Source:HGNC Symbol;Acc:HGNC:27006]	protein_coding	0.22367	-2.16056	5.28353e-28	down
ENSG00000110660	SLC35F2	ENST00000525815;ENST00000532513;ENST00000524991;ENST00000375682;ENST00000525071;ENST00000533664	solute carrier family 35 member F2 [Source:HGNC Symbol;Acc:HGNC:23615]	protein_coding;nonsense_mediated_decay	0.224507	-2.15517	4.02421e-19	down
ENSG00000167244	IGF2	ENST00000416167;ENST00000381395;ENST00000381392;ENST00000381389;ENST00000381406;ENST00000418738;ENST00000434045	insulin like growth factor 2 [Source:HGNC Symbol;Acc:HGNC:5466]	protein_coding	0.224882	-2.15276	2.23001e-12	down
ENSG00000140832	MARVELD3	ENST00000299952;ENST00000268485;ENST00000567501;ENST00000561682;ENST00000567566;ENST00000565261	MARVEL domain containing 3 [Source:HGNC Symbol;Acc:HGNC:30525]	protein_coding;processed_transcript	0.225365	-2.14966	5.27619e-12	down
ENSG00000114270	COL7A1	ENST00000328333;ENST00000466591;ENST00000487017;ENST00000462475;ENST00000467985;ENST00000465238;ENST00000459756;ENST00000422991;ENST00000470076;ENST00000474432	collagen type VII alpha 1 chain [Source:HGNC Symbol;Acc:HGNC:2214]	protein_coding;retained_intron;processed_transcript	0.225676	-2.14768	6.84453e-26	down
ENSG00000156711	MAPK13	ENST00000373766;ENST00000211287;ENST00000373759;ENST00000476951;ENST00000490334	mitogen-activated protein kinase 13 [Source:HGNC Symbol;Acc:HGNC:6875]	protein_coding;processed_transcript	0.225793	-2.14693	5.95002e-10	down
ENSG00000129667	RHBDF2	ENST00000675367;ENST00000674875;ENST00000313080;ENST00000590168;ENST00000587640;ENST00000590288;ENST00000589582;ENST00000591885;ENST00000591860;ENST00000590322;ENST00000591255;ENST00000592378;ENST00000591697;ENST00000585701;ENST00000585989;ENST00000592123;ENST00000591192;ENST00000589526;ENST00000593103;ENST00000591879	rhomboid 5 homolog 2 [Source:HGNC Symbol;Acc:HGNC:20788]	protein_coding;retained_intron;processed_transcript	0.227228	-2.13779	7.40783e-11	down
ENSG00000173193	PARP14	ENST00000474669;ENST00000474629;ENST00000475640;ENST00000483611;ENST00000460683;ENST00000494811;ENST00000649945	poly(ADP-ribose) polymerase family member 14 [Source:HGNC Symbol;Acc:HGNC:29232]	retained_intron;protein_coding;processed_transcript;nonsense_mediated_decay	0.227884	-2.13363	1.18304e-16	down
ENSG00000012779	ALOX5	ENST00000542434;ENST00000374391;ENST00000612635;ENST00000498461;ENST00000493336;ENST00000481117;ENST00000475300;ENST00000483623	arachidonate 5-lipoxygenase [Source:HGNC Symbol;Acc:HGNC:435]	protein_coding;processed_transcript	0.228248	-2.13133	2.95555e-13	down
ENSG00000095596	CYP26A1	ENST00000624589;ENST00000623162;ENST00000622925;ENST00000224356;ENST00000371531;ENST00000625202	cytochrome P450 family 26 subfamily A member 1 [Source:HGNC Symbol;Acc:HGNC:2603]	nonsense_mediated_decay;retained_intron;protein_coding	0.228468	-2.12994	0.0266626	down
ENSG00000138166	DUSP5	ENST00000369583;ENST00000468749	dual specificity phosphatase 5 [Source:HGNC Symbol;Acc:HGNC:3071]	protein_coding;processed_transcript	0.22865	-2.12879	5.9107e-11	down
ENSG00000171608	PIK3CD	ENST00000377346;ENST00000479223;ENST00000484851;ENST00000536656;ENST00000543390;ENST00000628140;ENST00000481137;ENST00000361110	phosphatidylinositol-4,5-bisphosphate 3-kinase catalytic subunit delta [Source:HGNC Symbol;Acc:HGNC:8977]	protein_coding;retained_intron;processed_transcript	0.22911	-2.12589	5.42692e-24	down
ENSG00000186790	FOXE3	ENST00000335071	forkhead box E3 [Source:HGNC Symbol;Acc:HGNC:3808]	protein_coding	0.229473	-2.1236	8.51561e-08	down
ENSG00000075426	FOSL2	ENST00000264716;ENST00000379619;ENST00000436647;ENST00000460736	FOS like 2, AP-1 transcription factor subunit [Source:HGNC Symbol;Acc:HGNC:3798]	protein_coding;processed_transcript	0.229651	-2.12249	2.29236e-25	down
ENSG00000145794	MEGF10	ENST00000503335;ENST00000506709;ENST00000508365;ENST00000510828;ENST00000515622;ENST00000515002;ENST00000507158;ENST00000418761;ENST00000510513;ENST00000274473	multiple EGF like domains 10 [Source:HGNC Symbol;Acc:HGNC:29634]	protein_coding;processed_transcript;retained_intron	0.232509	-2.10464	1.5567e-07	down
ENSG00000186832	KRT16	ENST00000301653;ENST00000588319;ENST00000590990;ENST00000593067	keratin 16 [Source:HGNC Symbol;Acc:HGNC:6423]	protein_coding;retained_intron	0.233096	-2.10101	0.000264402	down
ENSG00000106785	TRIM14	ENST00000341469;ENST00000475147;ENST00000342043;ENST00000478530;ENST00000478401;ENST00000375098	tripartite motif containing 14 [Source:HGNC Symbol;Acc:HGNC:16283]	protein_coding;nonsense_mediated_decay;processed_transcript	0.233164	-2.10058	5.03976e-07	down
ENSG00000108448	TRIM16L	ENST00000573443;ENST00000395671;ENST00000641182;ENST00000581904;ENST00000578086;ENST00000571708;ENST00000574042;ENST00000572555;ENST00000424146;ENST00000571542;ENST00000414850;ENST00000449552;ENST00000577969;ENST00000641936;ENST00000571733;ENST00000449697	tripartite motif containing 16 like [Source:HGNC Symbol;Acc:HGNC:32670]	processed_transcript;protein_coding;transcribed_unprocessed_pseudogene	0.233914	-2.09595	2.62496e-11	down
ENSG00000113578	FGF1	ENST00000359370;ENST00000610990;ENST00000360966;ENST00000394496;ENST00000619447;ENST00000494344;ENST00000612258;ENST00000419524;ENST00000378046;ENST00000441680;ENST00000337706;ENST00000489937;ENST00000411960;ENST00000621536;ENST00000494579;ENST00000407758	fibroblast growth factor 1 [Source:HGNC Symbol;Acc:HGNC:3665]	protein_coding;retained_intron;processed_transcript	0.233984	-2.09552	1.80552e-05	down
ENSG00000143631	FLG	ENST00000368799	filaggrin [Source:HGNC Symbol;Acc:HGNC:3748]	protein_coding	0.234279	-2.0937	0.000200422	down
ENSG00000120937	NPPB	ENST00000376468	natriuretic peptide B [Source:HGNC Symbol;Acc:HGNC:7940]	protein_coding	0.23468	-2.09124	4.62584e-25	down
ENSG00000165521	EML5	ENST00000554922;ENST00000380664;ENST00000553973;ENST00000553320;ENST00000553962;ENST00000555823;ENST00000553281;ENST00000553526	EMAP like 5 [Source:HGNC Symbol;Acc:HGNC:18197]	protein_coding;retained_intron;processed_transcript;nonsense_mediated_decay	0.234816	-2.0904	1.56078e-07	down
ENSG00000127666	TICAM1	ENST00000248244;ENST00000621756	toll like receptor adaptor molecule 1 [Source:HGNC Symbol;Acc:HGNC:18348]	protein_coding	0.234959	-2.08952	9.47763e-05	down
ENSG00000253313	C1orf210	ENST00000523677;ENST00000423420	chromosome 1 open reading frame 210 [Source:HGNC Symbol;Acc:HGNC:28755]	protein_coding	0.235019	-2.08915	3.57524e-07	down
ENSG00000139278	GLIPR1	ENST00000266659;ENST00000456650;ENST00000550491;ENST00000536703	GLI pathogenesis related 1 [Source:HGNC Symbol;Acc:HGNC:17001]	protein_coding;nonsense_mediated_decay	0.235127	-2.08849	8.167e-20	down
ENSG00000120907	ADRA1A	ENST00000380582;ENST00000380573;ENST00000519229;ENST00000380572;ENST00000380586;ENST00000521711;ENST00000518810;ENST00000519096;ENST00000518621;ENST00000354550;ENST00000276393	adrenoceptor alpha 1A [Source:HGNC Symbol;Acc:HGNC:277]	protein_coding;nonsense_mediated_decay;processed_transcript	0.235247	-2.08775	0.000349337	down
ENSG00000099337	KCNK6	ENST00000263372;ENST00000588137	potassium two pore domain channel subfamily K member 6 [Source:HGNC Symbol;Acc:HGNC:6281]	protein_coding;processed_transcript	0.235941	-2.0835	2.61469e-06	down
ENSG00000179059	ZFP42	ENST00000509524;ENST00000618147;ENST00000326866	ZFP42 zinc finger protein [Source:HGNC Symbol;Acc:HGNC:30949]	protein_coding	0.236269	-2.0815	3.72018e-10	down
ENSG00000165197	VEGFD	ENST00000297904;ENST00000488351	vascular endothelial growth factor D [Source:HGNC Symbol;Acc:HGNC:3708]	protein_coding;processed_transcript	0.236991	-2.0771	1.46957e-10	down
ENSG00000125462	C1orf61	ENST00000488498;ENST00000673141;ENST00000452465;ENST00000310027;ENST00000489877;ENST00000663987;ENST00000486517;ENST00000471156;ENST00000497824;ENST00000441085;ENST00000608007;ENST00000368242;ENST00000656222;ENST00000615748;ENST00000489918;ENST00000357975;ENST00000463309;ENST00000484428;ENST00000482932;ENST00000464238;ENST00000492750;ENST00000462458;ENST00000497822;ENST00000476966;ENST00000469813…	chromosome 1 open reading frame 61 [Source:HGNC Symbol;Acc:HGNC:30780]	processed_transcript;protein_coding	0.237266	-2.07542	1.67317e-05	down
ENSG00000111199	TRPV4	ENST00000675670;ENST00000675533;ENST00000544971;ENST00000261740;ENST00000541794;ENST00000538125;ENST00000674908;ENST00000676376;ENST00000537083;ENST00000418703;ENST00000536838	transient receptor potential cation channel subfamily V member 4 [Source:HGNC Symbol;Acc:HGNC:18083]	protein_coding;processed_transcript;nonsense_mediated_decay	0.23817	-2.06994	0.000562251	down
ENSG00000146904	EPHA1	ENST00000275815;ENST00000458129;ENST00000494989;ENST00000479459;ENST00000465208;ENST00000488068;ENST00000497891	EPH receptor A1 [Source:HGNC Symbol;Acc:HGNC:3385]	protein_coding;processed_transcript;retained_intron	0.238314	-2.06907	1.70898e-13	down
ENSG00000170113	NIPA1	ENST00000337435;ENST00000560105;ENST00000437912;ENST00000559448;ENST00000560069;ENST00000561183;ENST00000557930	NIPA magnesium transporter 1 [Source:HGNC Symbol;Acc:HGNC:17043]	protein_coding;retained_intron;nonsense_mediated_decay;processed_transcript	0.238543	-2.06768	0.00399961	down
ENSG00000141052	MYOCD	ENST00000425538;ENST00000395988;ENST00000579237;ENST00000343344;ENST00000443061	myocardin [Source:HGNC Symbol;Acc:HGNC:16067]	protein_coding;retained_intron;nonsense_mediated_decay	0.239091	-2.06437	3.56957e-06	down
ENSG00000152291	TGOLN2	ENST00000282120;ENST00000377386;ENST00000398263;ENST00000444342;ENST00000409015;ENST00000409232	trans-golgi network protein 2 [Source:HGNC Symbol;Acc:HGNC:15450]	protein_coding	0.239145	-2.06405	3.22523e-05	down
ENSG00000102034	ELF4	ENST00000615377;ENST00000308167;ENST00000434609;ENST00000335997	E74 like ETS transcription factor 4 [Source:HGNC Symbol;Acc:HGNC:3319]	protein_coding	0.239312	-2.06303	2.09377e-21	down
ENSG00000136535	TBR1	ENST00000389554;ENST00000411412;ENST00000489530;ENST00000463544;ENST00000410035;ENST00000477804	T-box brain transcription factor 1 [Source:HGNC Symbol;Acc:HGNC:11590]	protein_coding;processed_transcript;retained_intron	0.239672	-2.06087	6.6038e-07	down
ENSG00000188580	NKAIN2	ENST00000368417;ENST00000546092;ENST00000545433;ENST00000640160;ENST00000476571;ENST00000368416	sodium/potassium transporting ATPase interacting 2 [Source:HGNC Symbol;Acc:HGNC:16443]	protein_coding;nonsense_mediated_decay;processed_transcript	0.24009	-2.05835	1.53752e-08	down
ENSG00000135312	HTR1B	ENST00000369947	5-hydroxytryptamine receptor 1B [Source:HGNC Symbol;Acc:HGNC:5287]	protein_coding	0.240686	-2.05478	0.000547887	down
ENSG00000004399	PLXND1	ENST00000324093;ENST00000514990;ENST00000501038;ENST00000504524;ENST00000504689;ENST00000512744;ENST00000511018;ENST00000506979;ENST00000515191;ENST00000512807;ENST00000505237;ENST00000508630;ENST00000504767;ENST00000503166;ENST00000504979;ENST00000505505;ENST00000505665	plexin D1 [Source:HGNC Symbol;Acc:HGNC:9107]	protein_coding;retained_intron;nonsense_mediated_decay	0.240907	-2.05345	5.8127e-20	down
ENSG00000185298	CCDC137	ENST00000329214;ENST00000571916;ENST00000574200;ENST00000572531;ENST00000574107;ENST00000575223	coiled-coil domain containing 137 [Source:HGNC Symbol;Acc:HGNC:33451]	protein_coding;nonsense_mediated_decay;retained_intron	0.241224	-2.05156	1.69432e-15	down
ENSG00000167644	C19orf33	ENST00000591852;ENST00000301246;ENST00000588605;ENST00000589986	chromosome 19 open reading frame 33 [Source:HGNC Symbol;Acc:HGNC:16668]	retained_intron;protein_coding	0.241694	-2.04874	0.00347125	down
ENSG00000168843	FSTL5	ENST00000306100;ENST00000427802;ENST00000511999;ENST00000511170;ENST00000379164	follistatin like 5 [Source:HGNC Symbol;Acc:HGNC:21386]	protein_coding;processed_transcript	0.241983	-2.04702	2.16553e-05	down
ENSG00000178078	STAP2	ENST00000599736;ENST00000594605;ENST00000600324;ENST00000601179;ENST00000601956;ENST00000602007;ENST00000601482;ENST00000596242;ENST00000598443;ENST00000597593	signal transducing adaptor family member 2 [Source:HGNC Symbol;Acc:HGNC:30430]	nonsense_mediated_decay;protein_coding;retained_intron;processed_transcript	0.24286	-2.0418	4.58437e-16	down
ENSG00000244274	DBNDD2	ENST00000360981;ENST00000372710;ENST00000372712;ENST00000372723;ENST00000372722;ENST00000372717;ENST00000443296;ENST00000357275;ENST00000372720	dysbindin domain containing 2 [Source:HGNC Symbol;Acc:HGNC:15881]	protein_coding	0.243134	-2.04018	1.17054e-07	down
ENSG00000164626	KCNK5	ENST00000359534	potassium two pore domain channel subfamily K member 5 [Source:HGNC Symbol;Acc:HGNC:6280]	protein_coding	0.243462	-2.03823	1.21671e-06	down
ENSG00000157510	AFAP1L1	ENST00000296721;ENST00000455574;ENST00000508444;ENST00000513665;ENST00000522492;ENST00000515000	actin filament associated protein 1 like 1 [Source:HGNC Symbol;Acc:HGNC:26714]	protein_coding;retained_intron;processed_transcript	0.243565	-2.03762	0.00105984	down
ENSG00000128567	PODXL	ENST00000446198;ENST00000378555;ENST00000322985;ENST00000490761;ENST00000487965;ENST00000465001;ENST00000482581;ENST00000484346	podocalyxin like [Source:HGNC Symbol;Acc:HGNC:9171]	nonsense_mediated_decay;protein_coding;retained_intron;processed_transcript	0.243695	-2.03685	6.17306e-28	down
ENSG00000264230	ANXA8L1	ENST00000584982;ENST00000620353;ENST00000613703;ENST00000622769;ENST00000611655;ENST00000619162	annexin A8 like 1 [Source:HGNC Symbol;Acc:HGNC:23334]	protein_coding;retained_intron	0.244672	-2.03108	0.00532905	down
ENSG00000079308	TNS1	ENST00000430930;ENST00000615025;ENST00000646520;ENST00000171887;ENST00000479185;ENST00000495556;ENST00000651849;ENST00000419504;ENST00000439083;ENST00000446903;ENST00000492338;ENST00000423413;ENST00000649572;ENST00000413554;ENST00000465306;ENST00000480416;ENST00000449814;ENST00000446688;ENST00000413280;ENST00000480665;ENST00000310858;ENST00000611415;ENST00000453356;ENST00000490566	tensin 1 [Source:HGNC Symbol;Acc:HGNC:11973]	protein_coding;retained_intron;processed_transcript	0.244746	-2.03064	7.17948e-19	down
ENSG00000167105	TMEM92	ENST00000507382;ENST00000511882;ENST00000300433	transmembrane protein 92 [Source:HGNC Symbol;Acc:HGNC:26579]	protein_coding;processed_transcript	0.245314	-2.0273	3.26676e-06	down
ENSG00000187800	PEAR1	ENST00000292357;ENST00000469390;ENST00000338302;ENST00000444016;ENST00000482505;ENST00000465101;ENST00000455314	platelet endothelial aggregation receptor 1 [Source:HGNC Symbol;Acc:HGNC:33631]	protein_coding;retained_intron;nonsense_mediated_decay	0.247406	-2.01505	1.13128e-10	down
ENSG00000118729	CASQ2	ENST00000261448;ENST00000488931	calsequestrin 2 [Source:HGNC Symbol;Acc:HGNC:1513]	protein_coding;processed_transcript	0.247428	-2.01492	0.000369305	down
ENSG00000136826	KLF4	ENST00000497048;ENST00000374672;ENST00000493306;ENST00000411706;ENST00000610832;ENST00000420475	Kruppel like factor 4 [Source:HGNC Symbol;Acc:HGNC:6348]	retained_intron;protein_coding	0.247863	-2.01239	5.50987e-09	down
ENSG00000102007	PLP2	ENST00000376327;ENST00000376322	proteolipid protein 2 [Source:HGNC Symbol;Acc:HGNC:9087]	protein_coding	0.247953	-2.01186	1.22736e-05	down
ENSG00000183421	RIPK4	ENST00000332512;ENST00000352483	receptor interacting serine/threonine kinase 4 [Source:HGNC Symbol;Acc:HGNC:496]	protein_coding	0.248093	-2.01105	1.08332e-07	down
ENSG00000106236	NPTX2	ENST00000265634;ENST00000466102	neuronal pentraxin 2 [Source:HGNC Symbol;Acc:HGNC:7953]	protein_coding;retained_intron	0.248832	-2.00676	3.39084e-10	down
ENSG00000172215	CXCR6	ENST00000458629;ENST00000457814;ENST00000438735;ENST00000304552	C-X-C motif chemokine receptor 6 [Source:HGNC Symbol;Acc:HGNC:16647]	protein_coding	0.249493	-2.00293	0.00511152	down
ENSG00000109625	CPZ	ENST00000360986;ENST00000515606;ENST00000514875;ENST00000382480;ENST00000513486;ENST00000315782;ENST00000504070;ENST00000514602;ENST00000506287	carboxypeptidase Z [Source:HGNC Symbol;Acc:HGNC:2333]	protein_coding;nonsense_mediated_decay;retained_intron;processed_transcript	0.249742	-2.00149	0.00860819	down
ENSG00000027644	INSRR	ENST00000368195	insulin receptor related receptor [Source:HGNC Symbol;Acc:HGNC:6093]	protein_coding	0.251086	-1.99375	1.72247e-06	down
ENSG00000197747	S100A10	ENST00000368809;ENST00000368811;ENST00000478574;ENST00000478348	S100 calcium binding protein A10 [Source:HGNC Symbol;Acc:HGNC:10487]	protein_coding;processed_transcript	0.251088	-1.99374	1.3704e-29	down
ENSG00000168386	FILIP1L	ENST00000383694;ENST00000398326;ENST00000471562;ENST00000354552;ENST00000331335;ENST00000468533;ENST00000476723;ENST00000495625;ENST00000487087;ENST00000477258	filamin A interacting protein 1 like [Source:HGNC Symbol;Acc:HGNC:24589]	protein_coding;processed_transcript	0.251265	-1.99272	5.67122e-12	down
ENSG00000183287	CCBE1	ENST00000649564;ENST00000589419;ENST00000439986;ENST00000589116;ENST00000650467;ENST00000398179	collagen and calcium binding EGF domains 1 [Source:HGNC Symbol;Acc:HGNC:29426]	protein_coding;retained_intron	0.251395	-1.99197	5.76258e-05	down
ENSG00000163623	NKX6-1	ENST00000295886;ENST00000515820	NK6 homeobox 1 [Source:HGNC Symbol;Acc:HGNC:7839]	protein_coding	0.251405	-1.99191	4.49054e-12	down
ENSG00000110148	CCKBR	ENST00000334619;ENST00000525014;ENST00000525462;ENST00000532715;ENST00000532396;ENST00000531712	cholecystokinin B receptor [Source:HGNC Symbol;Acc:HGNC:1571]	protein_coding;processed_transcript	0.251612	-1.99073	1.76446e-08	down
ENSG00000184922	FMNL1	ENST00000587489;ENST00000331495;ENST00000586643;ENST00000587856;ENST00000586092;ENST00000592527;ENST00000328118;ENST00000592006;ENST00000589911;ENST00000591434;ENST00000585852;ENST00000592415	formin like 1 [Source:HGNC Symbol;Acc:HGNC:1212]	protein_coding;retained_intron;processed_transcript	0.251737	-1.99001	2.43232e-09	down
ENSG00000198785	GRIN3A	ENST00000361820;ENST00000479772	glutamate ionotropic receptor NMDA type subunit 3A [Source:HGNC Symbol;Acc:HGNC:16767]	protein_coding;processed_transcript	0.252842	-1.98369	1.55378e-10	down
ENSG00000105464	GRIN2D	ENST00000263269	glutamate ionotropic receptor NMDA type subunit 2D [Source:HGNC Symbol;Acc:HGNC:4588]	protein_coding	0.252975	-1.98293	1.5182e-09	down
ENSG00000124813	RUNX2	ENST00000646519;ENST00000371438;ENST00000371432;ENST00000371436;ENST00000473041;ENST00000625924;ENST00000478660;ENST00000483243;ENST00000483377;ENST00000359524;ENST00000647337;ENST00000576263	RUNX family transcription factor 2 [Source:HGNC Symbol;Acc:HGNC:10472]	nonsense_mediated_decay;protein_coding;processed_transcript	0.254681	-1.97324	0.000329831	down
ENSG00000187123	LYPD6	ENST00000334166;ENST00000392854;ENST00000414420;ENST00000409381;ENST00000418762;ENST00000651933	LY6/PLAUR domain containing 6 [Source:HGNC Symbol;Acc:HGNC:28751]	protein_coding;nonsense_mediated_decay	0.255641	-1.96781	2.86634e-14	down
ENSG00000187720	THSD4	ENST00000355327;ENST00000357769;ENST00000567776;ENST00000567838;ENST00000567745;ENST00000261862;ENST00000620694	thrombospondin type 1 domain containing 4 [Source:HGNC Symbol;Acc:HGNC:25835]	protein_coding;retained_intron;processed_transcript	0.256072	-1.96538	9.66363e-07	down
ENSG00000087494	PTHLH	ENST00000538310;ENST00000542963;ENST00000395872;ENST00000534890;ENST00000539239;ENST00000201015;ENST00000395868;ENST00000545234;ENST00000535992	parathyroid hormone like hormone [Source:HGNC Symbol;Acc:HGNC:9607]	protein_coding	0.256976	-1.96029	0.00169588	down
ENSG00000163531	NFASC	ENST00000471392;ENST00000495396;ENST00000404977;ENST00000403080;ENST00000503221;ENST00000512826;ENST00000367173;ENST00000425360;ENST00000401399;ENST00000492085;ENST00000404076;ENST00000468328;ENST00000493914;ENST00000504149;ENST00000513543;ENST00000539706;ENST00000514644;ENST00000404907;ENST00000504476;ENST00000413225;ENST00000430393;ENST00000339876;ENST00000360049;ENST00000505079;ENST00000447819	neurofascin [Source:HGNC Symbol;Acc:HGNC:29866]	processed_transcript;protein_coding;retained_intron;nonsense_mediated_decay	0.25704	-1.95994	6.08626e-08	down
ENSG00000069869	NEDD4	ENST00000435532;ENST00000508871;ENST00000648451;ENST00000338963;ENST00000514893;ENST00000506154;ENST00000513957;ENST00000507063;ENST00000503468;ENST00000508075;ENST00000502612;ENST00000557845;ENST00000508342	NEDD4 E3 ubiquitin protein ligase [Source:HGNC Symbol;Acc:HGNC:7727]	protein_coding;nonsense_mediated_decay;processed_transcript;retained_intron	0.257725	-1.9561	1.09893e-16	down
ENSG00000257446	ZNF878	ENST00000547628	zinc finger protein 878 [Source:HGNC Symbol;Acc:HGNC:37246]	protein_coding	0.258018	-1.95446	0.000493557	down
ENSG00000213886	UBD	ENST00000377050	ubiquitin D [Source:HGNC Symbol;Acc:HGNC:18795]	protein_coding	0.259975	-1.94356	2.74632e-05	down
ENSG00000126460	PRRG2	ENST00000246794;ENST00000543867;ENST00000596700;ENST00000596877;ENST00000597121	proline rich and Gla domain 2 [Source:HGNC Symbol;Acc:HGNC:9470]	protein_coding;retained_intron;processed_transcript;nonsense_mediated_decay	0.260142	-1.94263	0.00270612	down
ENSG00000089060	SLC8B1	ENST00000548186;ENST00000550047;ENST00000548477;ENST00000552014;ENST00000549069;ENST00000549181;ENST00000549605;ENST00000553238;ENST00000548518;ENST00000552565;ENST00000549372;ENST00000202831;ENST00000546737;ENST00000551230;ENST00000550672;ENST00000552613	solute carrier family 8 member B1 [Source:HGNC Symbol;Acc:HGNC:26175]	protein_coding;retained_intron;nonsense_mediated_decay;processed_transcript	0.26018	-1.94242	4.08624e-09	down
ENSG00000221818	EBF2	ENST00000520164;ENST00000535548;ENST00000408929;ENST00000517825	EBF transcription factor 2 [Source:HGNC Symbol;Acc:HGNC:19090]	protein_coding;retained_intron	0.260946	-1.93818	4.71134e-18	down
ENSG00000148288	GBGT1	ENST00000642916;ENST00000372038;ENST00000645973;ENST00000372040;ENST00000372043;ENST00000644196;ENST00000372036;ENST00000470431;ENST00000487864;ENST00000646215;ENST00000540636;ENST00000472281	globoside alpha-1,3-N-acetylgalactosaminyltransferase 1 (FORS blood group) [Source:HGNC Symbol;Acc:HGNC:20460]	processed_transcript;protein_coding;retained_intron	0.261407	-1.93563	0.0285059	down
ENSG00000198963	RORB	ENST00000376896;ENST00000396204	RAR related orphan receptor B [Source:HGNC Symbol;Acc:HGNC:10259]	protein_coding	0.262157	-1.9315	1.34611e-10	down
ENSG00000171161	ZNF672	ENST00000306562;ENST00000505503;ENST00000423362;ENST00000515369;ENST00000510904;ENST00000502697;ENST00000428515	zinc finger protein 672 [Source:HGNC Symbol;Acc:HGNC:26179]	protein_coding;processed_transcript	0.262201	-1.93125	3.06302e-05	down
ENSG00000170214	ADRA1B	ENST00000306675;ENST00000641475;ENST00000641205	adrenoceptor alpha 1B [Source:HGNC Symbol;Acc:HGNC:278]	protein_coding;processed_transcript	0.262229	-1.9311	0.00543912	down
ENSG00000205869	KRTAP5-1	ENST00000382171	keratin associated protein 5-1 [Source:HGNC Symbol;Acc:HGNC:23596]	protein_coding	0.262279	-1.93082	0.000683016	down
ENSG00000139173	TMEM117	ENST00000266534;ENST00000550495;ENST00000551577;ENST00000546978;ENST00000553253;ENST00000546387;ENST00000550623;ENST00000546868	transmembrane protein 117 [Source:HGNC Symbol;Acc:HGNC:25308]	protein_coding;processed_transcript;retained_intron;nonsense_mediated_decay	0.262414	-1.93008	2.83719e-09	down
ENSG00000184156	KCNQ3	ENST00000388996;ENST00000639496;ENST00000521134;ENST00000519445;ENST00000621976;ENST00000638588;ENST00000639358;ENST00000519589	potassium voltage-gated channel subfamily Q member 3 [Source:HGNC Symbol;Acc:HGNC:6297]	protein_coding;nonsense_mediated_decay;retained_intron	0.262674	-1.92865	3.28688e-09	down
ENSG00000113749	HRH2	ENST00000636584;ENST00000377291;ENST00000624694;ENST00000231683	histamine receptor H2 [Source:HGNC Symbol;Acc:HGNC:5183]	protein_coding;nonsense_mediated_decay	0.263413	-1.9246	2.5837e-05	down
ENSG00000105825	TFPI2	ENST00000222543;ENST00000650573;ENST00000649913;ENST00000451238;ENST00000647793;ENST00000461482	tissue factor pathway inhibitor 2 [Source:HGNC Symbol;Acc:HGNC:11761]	protein_coding;retained_intron	0.263803	-1.92246	4.52545e-09	down
ENSG00000130545	CRB3	ENST00000600229;ENST00000356762;ENST00000308243;ENST00000598494	crumbs cell polarity complex component 3 [Source:HGNC Symbol;Acc:HGNC:20237]	protein_coding	0.264799	-1.91703	5.7553e-06	down
ENSG00000042980	ADAM28	ENST00000265769;ENST00000520665;ENST00000520448;ENST00000523236;ENST00000521629;ENST00000523440;ENST00000523379;ENST00000518737;ENST00000521110;ENST00000437154;ENST00000518326;ENST00000518516	ADAM metallopeptidase domain 28 [Source:HGNC Symbol;Acc:HGNC:206]	protein_coding;retained_intron;nonsense_mediated_decay;processed_transcript	0.2649	-1.91648	0.00037977	down
ENSG00000128591	FLNC	ENST00000325888;ENST00000346177;ENST00000388853	filamin C [Source:HGNC Symbol;Acc:HGNC:3756]	protein_coding;retained_intron	0.265356	-1.914	1.06492e-20	down
ENSG00000182379	NXPH4	ENST00000349394;ENST00000555154;ENST00000556415	neurexophilin 4 [Source:HGNC Symbol;Acc:HGNC:8078]	protein_coding;processed_transcript;nonsense_mediated_decay	0.266242	-1.90919	1.09534e-11	down
ENSG00000163286	ALPG	ENST00000295453	alkaline phosphatase, germ cell [Source:HGNC Symbol;Acc:HGNC:441]	protein_coding	0.26713	-1.90439	0.000536544	down
ENSG00000251493	FOXD1	ENST00000615637;ENST00000513595	forkhead box D1 [Source:HGNC Symbol;Acc:HGNC:3802]	protein_coding;processed_transcript	0.267439	-1.90272	0.00385103	down
ENSG00000204604	ZNF468	ENST00000243639;ENST00000595646;ENST00000601980;ENST00000597924;ENST00000602144;ENST00000601847;ENST00000396409	zinc finger protein 468 [Source:HGNC Symbol;Acc:HGNC:33105]	protein_coding;nonsense_mediated_decay	0.267439	-1.90272	0.00204721	down
ENSG00000173918	C1QTNF1	ENST00000580474;ENST00000339142;ENST00000579760;ENST00000583904;ENST00000311661;ENST00000578229;ENST00000582625;ENST00000581774;ENST00000580454;ENST00000392445;ENST00000354124;ENST00000582295	C1q and TNF related 1 [Source:HGNC Symbol;Acc:HGNC:14324]	protein_coding;processed_transcript	0.268421	-1.89743	3.24035e-06	down
ENSG00000166741	NNMT	ENST00000535401;ENST00000546313;ENST00000535185;ENST00000545255;ENST00000541090;ENST00000299964;ENST00000542647;ENST00000541754	nicotinamide N-methyltransferase [Source:HGNC Symbol;Acc:HGNC:7861]	protein_coding;retained_intron;processed_transcript	0.268716	-1.89585	0.000155321	down
ENSG00000101443	WFDC2	ENST00000372676;ENST00000342873;ENST00000488143;ENST00000447118;ENST00000339946;ENST00000462062;ENST00000217425	WAP four-disulfide core domain 2 [Source:HGNC Symbol;Acc:HGNC:15939]	protein_coding;processed_transcript;nonsense_mediated_decay	0.26947	-1.8918	4.45504e-15	down
ENSG00000111846	GCNT2	ENST00000474983;ENST00000495262;ENST00000265012;ENST00000397423;ENST00000379597;ENST00000316170;ENST00000489225;ENST00000474518;ENST00000410107;ENST00000459872;ENST00000483204;ENST00000485764;ENST00000640968;ENST00000488742;ENST00000489819;ENST00000475577;ENST00000461400	glucosaminyl (N-acetyl) transferase 2 (I blood group) [Source:HGNC Symbol;Acc:HGNC:4204]	retained_intron;protein_coding;processed_transcript	0.269975	-1.8891	1.84423e-12	down
ENSG00000128285	MCHR1	ENST00000249016;ENST00000498400;ENST00000465662;ENST00000381433	melanin concentrating hormone receptor 1 [Source:HGNC Symbol;Acc:HGNC:4479]	protein_coding;processed_transcript	0.270021	-1.88886	1.31273e-05	down
ENSG00000163735	CXCL5	ENST00000296027	C-X-C motif chemokine ligand 5 [Source:HGNC Symbol;Acc:HGNC:10642]	protein_coding	0.270137	-1.88824	0.000515067	down
ENSG00000163235	TGFA	ENST00000295400;ENST00000394241;ENST00000450929;ENST00000460808;ENST00000445399;ENST00000418333;ENST00000474101;ENST00000419940;ENST00000444975	transforming growth factor alpha [Source:HGNC Symbol;Acc:HGNC:11765]	protein_coding;processed_transcript	0.270537	-1.8861	2.74442e-05	down
ENSG00000006062	MAP3K14	ENST00000592267;ENST00000586644;ENST00000376926;ENST00000344686;ENST00000617331	mitogen-activated protein kinase kinase kinase 14 [Source:HGNC Symbol;Acc:HGNC:6853]	retained_intron;protein_coding	0.270914	-1.88409	5.65018e-12	down
ENSG00000164120	HPGD	ENST00000296522;ENST00000510901;ENST00000541923;ENST00000509512;ENST00000511499;ENST00000508330;ENST00000422112;ENST00000542498;ENST00000510835;ENST00000512410;ENST00000504433;ENST00000506910;ENST00000296521;ENST00000514584	15-hydroxyprostaglandin dehydrogenase [Source:HGNC Symbol;Acc:HGNC:5154]	protein_coding;retained_intron;nonsense_mediated_decay	0.271235	-1.88239	2.75102e-05	down
ENSG00000130283	GDF1	ENST00000247005	growth differentiation factor 1 [Source:HGNC Symbol;Acc:HGNC:4214]	protein_coding	0.272781	-1.87419	0.0338163	down
ENSG00000176532	PRR15	ENST00000450427;ENST00000319694	proline rich 15 [Source:HGNC Symbol;Acc:HGNC:22310]	protein_coding	0.272999	-1.87303	7.26115e-07	down
ENSG00000114529	C3orf52	ENST00000467942;ENST00000264848;ENST00000480282;ENST00000484828;ENST00000431717;ENST00000494096;ENST00000497610	chromosome 3 open reading frame 52 [Source:HGNC Symbol;Acc:HGNC:26255]	processed_transcript;protein_coding;retained_intron	0.274065	-1.86741	5.6258e-09	down
ENSG00000149948	HMGA2	ENST00000403681;ENST00000545998;ENST00000541363;ENST00000354636;ENST00000537275;ENST00000537429;ENST00000536545;ENST00000393577;ENST00000425208;ENST00000393578;ENST00000539662	high mobility group AT-hook 2 [Source:HGNC Symbol;Acc:HGNC:5009]	protein_coding;retained_intron;nonsense_mediated_decay	0.274267	-1.86635	0.000479839	down
ENSG00000182752	PAPPA	ENST00000328252;ENST00000460463;ENST00000483254	pappalysin 1 [Source:HGNC Symbol;Acc:HGNC:8602]	protein_coding;processed_transcript	0.274281	-1.86628	2.58703e-19	down
ENSG00000149573	MPZL2	ENST00000438295;ENST00000534175;ENST00000527282;ENST00000529376;ENST00000278937;ENST00000528554;ENST00000525647	myelin protein zero like 2 [Source:HGNC Symbol;Acc:HGNC:3496]	protein_coding;retained_intron;processed_transcript	0.274762	-1.86375	0.00150253	down
ENSG00000241360	PDXP	ENST00000215904;ENST00000403251	pyridoxal phosphatase [Source:HGNC Symbol;Acc:HGNC:30259]	protein_coding	0.275358	-1.86062	0.00942765	down
ENSG00000067066	SP100	ENST00000264052;ENST00000488180;ENST00000409824;ENST00000466710;ENST00000340126;ENST00000427101;ENST00000452345;ENST00000462751;ENST00000470940;ENST00000459786;ENST00000413284;ENST00000431952;ENST00000409112;ENST00000409897;ENST00000492546;ENST00000494508;ENST00000494901;ENST00000409341;ENST00000432979	SP100 nuclear antigen [Source:HGNC Symbol;Acc:HGNC:11206]	protein_coding;retained_intron	0.275499	-1.85988	7.39633e-05	down
ENSG00000180353	HCLS1	ENST00000473883;ENST00000464274;ENST00000468693;ENST00000428394;ENST00000487290;ENST00000488033;ENST00000495491;ENST00000491824;ENST00000481314;ENST00000314583;ENST00000479994;ENST00000497391	hematopoietic cell-specific Lyn substrate 1 [Source:HGNC Symbol;Acc:HGNC:4844]	processed_transcript;nonsense_mediated_decay;protein_coding;retained_intron	0.27617	-1.85637	0.00263951	down
ENSG00000167755	KLK6	ENST00000376851;ENST00000594641;ENST00000597379;ENST00000310157;ENST00000391808;ENST00000599690;ENST00000599881	kallikrein related peptidase 6 [Source:HGNC Symbol;Acc:HGNC:6367]	protein_coding;nonsense_mediated_decay	0.276923	-1.85244	8.84302e-06	down
ENSG00000213648	SULT1A4	ENST00000360423;ENST00000562941;ENST00000569544;ENST00000563944;ENST00000565290	sulfotransferase family 1A member 4 [Source:HGNC Symbol;Acc:HGNC:30004]	protein_coding;retained_intron;nonsense_mediated_decay	0.277057	-1.85175	0.0138643	down
ENSG00000128610	FEZF1	ENST00000442488;ENST00000418046;ENST00000427185	FEZ family zinc finger 1 [Source:HGNC Symbol;Acc:HGNC:22788]	protein_coding	0.277379	-1.85007	2.46756e-12	down
ENSG00000145198	VWA5B2	ENST00000426955;ENST00000497229;ENST00000493493;ENST00000461141;ENST00000474580;ENST00000273794	von Willebrand factor A domain containing 5B2 [Source:HGNC Symbol;Acc:HGNC:25144]	protein_coding;retained_intron	0.278249	-1.84555	0.000925642	down
ENSG00000259305	ZHX1-C8orf76	ENST00000622816;ENST00000357082	ZHX1-C8orf76 readthrough [Source:HGNC Symbol;Acc:HGNC:42975]	protein_coding	0.278448	-1.84452	0.0259735	down
ENSG00000114423	CBLB	ENST00000394030;ENST00000645759;ENST00000476370;ENST00000407712;ENST00000405772;ENST00000403724;ENST00000447441;ENST00000438603;ENST00000646499;ENST00000643403;ENST00000642241;ENST00000642907;ENST00000643192;ENST00000443752;ENST00000645425;ENST00000643322;ENST00000646825	Cbl proto-oncogene B [Source:HGNC Symbol;Acc:HGNC:1542]	protein_coding;nonsense_mediated_decay;retained_intron;processed_transcript	0.278764	-1.84288	4.403e-23	down
ENSG00000273604	EPOP	ENST00000621654	elongin BC and polycomb repressive complex 2 associated protein [Source:HGNC Symbol;Acc:HGNC:34493]	protein_coding	0.279463	-1.83927	4.07664e-10	down
ENSG00000162777	DENND2D	ENST00000477586;ENST00000468692;ENST00000357640;ENST00000473682;ENST00000473822;ENST00000488786;ENST00000463713;ENST00000369752	DENN domain containing 2D [Source:HGNC Symbol;Acc:HGNC:26192]	processed_transcript;protein_coding	0.28068	-1.833	0.006041	down
ENSG00000131650	KREMEN2	ENST00000572045;ENST00000303746;ENST00000575769;ENST00000319500;ENST00000571007;ENST00000575885	kringle containing transmembrane protein 2 [Source:HGNC Symbol;Acc:HGNC:18797]	protein_coding	0.281537	-1.82861	0.000132737	down
ENSG00000144476	ACKR3	ENST00000447924;ENST00000272928	atypical chemokine receptor 3 [Source:HGNC Symbol;Acc:HGNC:23692]	protein_coding	0.281579	-1.82839	1.89952e-13	down
ENSG00000143507	DUSP10	ENST00000366899;ENST00000477026;ENST00000494642;ENST00000468085	dual specificity phosphatase 10 [Source:HGNC Symbol;Acc:HGNC:3065]	protein_coding;nonsense_mediated_decay	0.281967	-1.8264	5.47994e-12	down
ENSG00000205744	DENND1C	ENST00000381480;ENST00000591795;ENST00000590818;ENST00000588988;ENST00000590867;ENST00000591030;ENST00000590473;ENST00000588421;ENST00000592543;ENST00000590173;ENST00000543576;ENST00000590444;ENST00000586046;ENST00000589491	DENN domain containing 1C [Source:HGNC Symbol;Acc:HGNC:26225]	protein_coding;retained_intron;nonsense_mediated_decay;processed_transcript	0.282227	-1.82507	2.42926e-06	down
ENSG00000057294	PKP2	ENST00000070846;ENST00000340811;ENST00000546741;ENST00000552612;ENST00000546769;ENST00000546498;ENST00000549461	plakophilin 2 [Source:HGNC Symbol;Acc:HGNC:9024]	protein_coding;retained_intron	0.282381	-1.82428	3.88456e-26	down
ENSG00000100234	TIMP3	ENST00000266085	TIMP metallopeptidase inhibitor 3 [Source:HGNC Symbol;Acc:HGNC:11822]	protein_coding	0.282815	-1.82207	2.55984e-15	down
ENSG00000123689	G0S2	ENST00000367029	G0/G1 switch 2 [Source:HGNC Symbol;Acc:HGNC:30229]	protein_coding	0.283408	-1.81905	0.00190045	down
ENSG00000164093	PITX2	ENST00000394595;ENST00000644743;ENST00000557119;ENST00000355080;ENST00000614423;ENST00000607868;ENST00000511837;ENST00000644488;ENST00000511990;ENST00000613094;ENST00000354925;ENST00000645131;ENST00000556049;ENST00000616641	paired like homeodomain 2 [Source:HGNC Symbol;Acc:HGNC:9005]	protein_coding;retained_intron;processed_transcript	0.284059	-1.81574	4.08326e-06	down
ENSG00000146072	TNFRSF21	ENST00000296861	TNF receptor superfamily member 21 [Source:HGNC Symbol;Acc:HGNC:13469]	protein_coding	0.284889	-1.81153	2.49894e-28	down
ENSG00000137766	UNC13C	ENST00000260323;ENST00000539562;ENST00000647821;ENST00000561210;ENST00000560537;ENST00000559093	unc-13 homolog C [Source:HGNC Symbol;Acc:HGNC:23149]	protein_coding;retained_intron	0.285494	-1.80847	0.0136986	down
ENSG00000168348	INSM2	ENST00000307169	INSM transcriptional repressor 2 [Source:HGNC Symbol;Acc:HGNC:17539]	protein_coding	0.285564	-1.80811	3.46464e-09	down
ENSG00000141013	GAS8	ENST00000536122;ENST00000268699;ENST00000569558;ENST00000569399;ENST00000565000;ENST00000568664;ENST00000564853;ENST00000565062;ENST00000566266;ENST00000564789;ENST00000563980;ENST00000568705;ENST00000568284;ENST00000561675;ENST00000565957;ENST00000564392;ENST00000620723;ENST00000564802;ENST00000537797;ENST00000540721	growth arrest specific 8 [Source:HGNC Symbol;Acc:HGNC:4166]	protein_coding;retained_intron;processed_transcript;nonsense_mediated_decay	0.285715	-1.80735	3.57524e-07	down
ENSG00000131094	C1QL1	ENST00000253407	complement C1q like 1 [Source:HGNC Symbol;Acc:HGNC:24182]	protein_coding	0.286304	-1.80438	3.46588e-08	down
ENSG00000099282	TSPAN15	ENST00000373290;ENST00000475069;ENST00000459981;ENST00000470508;ENST00000486093;ENST00000452130;ENST00000490083;ENST00000478112	tetraspanin 15 [Source:HGNC Symbol;Acc:HGNC:23298]	protein_coding;retained_intron;processed_transcript	0.286785	-1.80196	1.23699e-12	down
ENSG00000183018	SPNS2	ENST00000329078;ENST00000570979;ENST00000571386;ENST00000576635;ENST00000573990;ENST00000571668;ENST00000573106;ENST00000570641	sphingolipid transporter 2 [Source:HGNC Symbol;Acc:HGNC:26992]	protein_coding;retained_intron	0.287168	-1.80003	1.96903e-11	down
ENSG00000173848	NET1	ENST00000380359;ENST00000484741;ENST00000355029;ENST00000465087;ENST00000449083;ENST00000486354	neuroepithelial cell transforming 1 [Source:HGNC Symbol;Acc:HGNC:14592]	protein_coding;processed_transcript	0.289297	-1.78937	8.3788e-21	down
ENSG00000188060	RAB42	ENST00000373826;ENST00000465518	RAB42, member RAS oncogene family [Source:HGNC Symbol;Acc:HGNC:28702]	protein_coding	0.290379	-1.78399	0.000716103	down
ENSG00000187122	SLIT1	ENST00000266058;ENST00000456008;ENST00000314867;ENST00000371041;ENST00000371070;ENST00000497714;ENST00000494968	slit guidance ligand 1 [Source:HGNC Symbol;Acc:HGNC:11085]	protein_coding;processed_transcript	0.291563	-1.77812	6.06612e-14	down
ENSG00000230873	STMND1	ENST00000366215;ENST00000536551;ENST00000354384	stathmin domain containing 1 [Source:HGNC Symbol;Acc:HGNC:44668]	retained_intron;protein_coding	0.292832	-1.77186	0.00734562	down
ENSG00000142632	ARHGEF19	ENST00000449495;ENST00000270747;ENST00000441785;ENST00000478210;ENST00000478117;ENST00000471928	Rho guanine nucleotide exchange factor 19 [Source:HGNC Symbol;Acc:HGNC:26604]	protein_coding;processed_transcript	0.292893	-1.77156	4.51338e-07	down
ENSG00000111319	SCNN1A	ENST00000228916;ENST00000360168;ENST00000396966;ENST00000542260;ENST00000538979;ENST00000545605;ENST00000543585;ENST00000366131;ENST00000539030;ENST00000536087;ENST00000536176;ENST00000544882;ENST00000540037;ENST00000536788;ENST00000542436;ENST00000536411;ENST00000542966;ENST00000541249;ENST00000539953;ENST00000543768;ENST00000338748;ENST00000457871;ENST00000538957	sodium channel epithelial 1 subunit alpha [Source:HGNC Symbol;Acc:HGNC:10599]	protein_coding;processed_transcript;nonsense_mediated_decay	0.293491	-1.76861	3.29796e-12	down
ENSG00000162645	GBP2	ENST00000370466;ENST00000493802;ENST00000463660;ENST00000464839	guanylate binding protein 2 [Source:HGNC Symbol;Acc:HGNC:4183]	protein_coding;processed_transcript;nonsense_mediated_decay	0.293708	-1.76755	0.0038006	down
ENSG00000198121	LPAR1	ENST00000441240;ENST00000374431;ENST00000374430;ENST00000541779;ENST00000358883	lysophosphatidic acid receptor 1 [Source:HGNC Symbol;Acc:HGNC:3166]	protein_coding	0.294578	-1.76328	9.87281e-07	down
ENSG00000142197	DOP1B	ENST00000399151;ENST00000270190;ENST00000463668;ENST00000492760	DOP1 leucine zipper like protein B [Source:HGNC Symbol;Acc:HGNC:1291]	protein_coding;retained_intron;processed_transcript	0.29477	-1.76234	2.08885e-19	down
ENSG00000220008	LINGO3	ENST00000585527	leucine rich repeat and Ig domain containing 3 [Source:HGNC Symbol;Acc:HGNC:21206]	protein_coding	0.294886	-1.76177	0.00275917	down
ENSG00000151458	ANKRD50	ENST00000504087;ENST00000515641	ankyrin repeat domain 50 [Source:HGNC Symbol;Acc:HGNC:29223]	protein_coding	0.295008	-1.76117	7.47612e-26	down
ENSG00000139174	PRICKLE1	ENST00000345127;ENST00000552240;ENST00000640840;ENST00000639589;ENST00000640801;ENST00000640946;ENST00000639958;ENST00000552108;ENST00000639414;ENST00000639588;ENST00000455697;ENST00000640132;ENST00000548696;ENST00000551050;ENST00000639566;ENST00000640361;ENST00000445766;ENST00000547113;ENST00000640646;ENST00000640055;ENST00000552200	prickle planar cell polarity protein 1 [Source:HGNC Symbol;Acc:HGNC:17019]	protein_coding;retained_intron;processed_transcript	0.295011	-1.76116	3.89433e-12	down
ENSG00000213654	GPSM3	ENST00000375040;ENST00000472768;ENST00000375043;ENST00000487761;ENST00000619085	G protein signaling modulator 3 [Source:HGNC Symbol;Acc:HGNC:13945]	protein_coding;nonsense_mediated_decay	0.295053	-1.76096	3.63124e-06	down
ENSG00000026508	CD44	ENST00000527889;ENST00000279452;ENST00000525211;ENST00000278385;ENST00000525348;ENST00000531110;ENST00000526000;ENST00000527326;ENST00000526669;ENST00000442151;ENST00000425428;ENST00000278386;ENST00000528672;ENST00000525469;ENST00000525688;ENST00000434472;ENST00000415148;ENST00000528455;ENST00000531141;ENST00000352818;ENST00000534082;ENST00000534296;ENST00000525685;ENST00000526553;ENST00000533222…	CD44 molecule (Indian blood group) [Source:HGNC Symbol;Acc:HGNC:1681]	protein_coding;retained_intron;nonsense_mediated_decay;processed_transcript	0.295133	-1.76056	0.000422516	down
ENSG00000120738	EGR1	ENST00000239938	early growth response 1 [Source:HGNC Symbol;Acc:HGNC:3238]	protein_coding	0.295281	-1.75984	1.32083e-06	down
ENSG00000107957	SH3PXD2A	ENST00000355946;ENST00000369774;ENST00000420222;ENST00000315994	SH3 and PX domains 2A [Source:HGNC Symbol;Acc:HGNC:23664]	protein_coding;processed_transcript	0.295517	-1.75869	8.16499e-18	down
ENSG00000176435	CLEC14A	ENST00000342213	C-type lectin domain containing 14A [Source:HGNC Symbol;Acc:HGNC:19832]	protein_coding	0.295681	-1.75789	0.00104062	down
ENSG00000120457	KCNJ5	ENST00000529694;ENST00000338350;ENST00000533599	potassium inwardly rectifying channel subfamily J member 5 [Source:HGNC Symbol;Acc:HGNC:6266]	protein_coding	0.295688	-1.75785	7.18856e-05	down
ENSG00000048052	HDAC9	ENST00000622668;ENST00000524023;ENST00000406072;ENST00000406451;ENST00000405010;ENST00000456174;ENST00000428307;ENST00000433709;ENST00000455069;ENST00000471887;ENST00000441986;ENST00000523867;ENST00000461409;ENST00000441542;ENST00000430454;ENST00000413380;ENST00000401921;ENST00000483142;ENST00000446646;ENST00000496026;ENST00000490851;ENST00000474742;ENST00000432645;ENST00000411993;ENST00000461159…	histone deacetylase 9 [Source:HGNC Symbol;Acc:HGNC:14065]	protein_coding;retained_intron;processed_transcript;nonsense_mediated_decay	0.296042	-1.75612	1.36714e-18	down
ENSG00000143473	KCNH1	ENST00000639952;ENST00000271751;ENST00000640710;ENST00000640566;ENST00000367007;ENST00000640243;ENST00000639754;ENST00000624583;ENST00000640625;ENST00000638357;ENST00000640890;ENST00000640044;ENST00000640522;ENST00000639385;ENST00000638498;ENST00000638960;ENST00000640528	potassium voltage-gated channel subfamily H member 1 [Source:HGNC Symbol;Acc:HGNC:6250]	protein_coding;nonsense_mediated_decay;retained_intron;processed_transcript	0.296043	-1.75612	1.55822e-07	down
ENSG00000137265	IRF4	ENST00000380956;ENST00000495137;ENST00000469834;ENST00000493114;ENST00000468485	interferon regulatory factor 4 [Source:HGNC Symbol;Acc:HGNC:6119]	protein_coding;processed_transcript;nonsense_mediated_decay	0.296246	-1.75513	0.0012134	down
ENSG00000090339	ICAM1	ENST00000264832;ENST00000588645;ENST00000585443;ENST00000592686;ENST00000423829	intercellular adhesion molecule 1 [Source:HGNC Symbol;Acc:HGNC:5344]	protein_coding;processed_transcript;retained_intron	0.296366	-1.75455	9.90628e-07	down
ENSG00000188219	POTEE	ENST00000356920;ENST00000358087;ENST00000514256;ENST00000626191;ENST00000613282	POTE ankyrin domain family member E [Source:HGNC Symbol;Acc:HGNC:33895]	protein_coding;nonsense_mediated_decay	0.29658	-1.75351	0.015412	down
ENSG00000165105	RASEF	ENST00000376447;ENST00000340717	RAS and EF-hand domain containing [Source:HGNC Symbol;Acc:HGNC:26464]	protein_coding	0.297842	-1.74738	0.000754967	down
ENSG00000110975	SYT10	ENST00000228567;ENST00000567656;ENST00000539102	synaptotagmin 10 [Source:HGNC Symbol;Acc:HGNC:19266]	protein_coding;processed_transcript;nonsense_mediated_decay	0.298689	-1.74329	0.00117473	down
ENSG00000131037	EPS8L1	ENST00000245618;ENST00000591219;ENST00000587715;ENST00000201647;ENST00000589362;ENST00000587901;ENST00000587786;ENST00000589694;ENST00000586329;ENST00000585347;ENST00000590610;ENST00000592318;ENST00000540810;ENST00000592824;ENST00000592284;ENST00000590232;ENST00000592102;ENST00000588359;ENST00000592044	EPS8 like 1 [Source:HGNC Symbol;Acc:HGNC:21295]	protein_coding;retained_intron;processed_transcript;nonsense_mediated_decay	0.299382	-1.73994	2.41143e-12	down
ENSG00000088305	DNMT3B	ENST00000353855;ENST00000328111;ENST00000201963;ENST00000443239;ENST00000456297;ENST00000348286	DNA methyltransferase 3 beta [Source:HGNC Symbol;Acc:HGNC:2979]	protein_coding	0.299521	-1.73927	1.11791e-16	down
ENSG00000268089	GABRQ	ENST00000598523	gamma-aminobutyric acid type A receptor subunit theta [Source:HGNC Symbol;Acc:HGNC:14454]	protein_coding	0.299943	-1.73724	0.000270098	down
ENSG00000177791	MYOZ1	ENST00000359322	myozenin 1 [Source:HGNC Symbol;Acc:HGNC:13752]	protein_coding	0.300232	-1.73585	4.49684e-07	down
ENSG00000175505	CLCF1	ENST00000312438;ENST00000533438	cardiotrophin like cytokine factor 1 [Source:HGNC Symbol;Acc:HGNC:17412]	protein_coding	0.30027	-1.73567	4.45052e-05	down
ENSG00000158769	F11R	ENST00000621309;ENST00000368026;ENST00000472573;ENST00000602966;ENST00000335772;ENST00000537746	F11 receptor [Source:HGNC Symbol;Acc:HGNC:14685]	protein_coding;processed_transcript;retained_intron	0.300303	-1.73551	4.20644e-07	down
ENSG00000165912	PACSIN3	ENST00000298838;ENST00000539589;ENST00000528201;ENST00000528462;ENST00000530405;ENST00000532457;ENST00000525725;ENST00000531226;ENST00000533686;ENST00000530513;ENST00000524509	protein kinase C and casein kinase substrate in neurons 3 [Source:HGNC Symbol;Acc:HGNC:8572]	protein_coding;nonsense_mediated_decay	0.301181	-1.7313	6.81919e-06	down
ENSG00000180530	NRIP1	ENST00000318948;ENST00000400199;ENST00000400202;ENST00000637630;ENST00000638122;ENST00000637963;ENST00000411932	nuclear receptor interacting protein 1 [Source:HGNC Symbol;Acc:HGNC:8001]	protein_coding;processed_transcript	0.30143	-1.7301	2.98009e-05	down
ENSG00000065361	ERBB3	ENST00000553131;ENST00000549832;ENST00000267101;ENST00000549644;ENST00000549472;ENST00000549205;ENST00000551085;ENST00000549061;ENST00000552691;ENST00000551176;ENST00000415288;ENST00000551242;ENST00000411731;ENST00000550070;ENST00000550869;ENST00000643266;ENST00000643518;ENST00000548709;ENST00000549282;ENST00000550828;ENST00000546884;ENST00000549672;ENST00000546748	erb-b2 receptor tyrosine kinase 3 [Source:HGNC Symbol;Acc:HGNC:3431]	protein_coding;retained_intron;nonsense_mediated_decay;processed_transcript	0.302169	-1.72657	2.25249e-10	down
ENSG00000196187	TMEM63A	ENST00000366835;ENST00000474478;ENST00000487971;ENST00000496025;ENST00000482753;ENST00000537914;ENST00000487817;ENST00000483779;ENST00000436966	transmembrane protein 63A [Source:HGNC Symbol;Acc:HGNC:29118]	protein_coding;processed_transcript;retained_intron	0.302341	-1.72575	1.59941e-09	down
ENSG00000135362	PRR5L	ENST00000378867;ENST00000532578;ENST00000529020;ENST00000524380;ENST00000530627;ENST00000525672;ENST00000527172;ENST00000532843;ENST00000389693;ENST00000526679;ENST00000531269;ENST00000530252;ENST00000529034;ENST00000526682;ENST00000526728;ENST00000532121;ENST00000530050;ENST00000530639;ENST00000527487;ENST00000527751	proline rich 5 like [Source:HGNC Symbol;Acc:HGNC:25878]	protein_coding;processed_transcript	0.302417	-1.72539	1.01419e-07	down
ENSG00000198053	SIRPA	ENST00000358771;ENST00000622179;ENST00000400068;ENST00000356025	signal regulatory protein alpha [Source:HGNC Symbol;Acc:HGNC:9662]	protein_coding	0.302549	-1.72476	1.05189e-15	down
ENSG00000175592	FOSL1	ENST00000531493;ENST00000312562;ENST00000534222;ENST00000532401;ENST00000448083	FOS like 1, AP-1 transcription factor subunit [Source:HGNC Symbol;Acc:HGNC:13718]	protein_coding	0.303283	-1.72126	3.94877e-05	down
ENSG00000101198	NKAIN4	ENST00000370316;ENST00000486495;ENST00000370313;ENST00000461738;ENST00000370317;ENST00000470246;ENST00000472670;ENST00000466885;ENST00000370307	sodium/potassium transporting ATPase interacting 4 [Source:HGNC Symbol;Acc:HGNC:16191]	protein_coding;retained_intron;processed_transcript	0.303718	-1.71919	9.32143e-15	down
ENSG00000100867	DHRS2	ENST00000250383;ENST00000611765;ENST00000556701;ENST00000553896;ENST00000557535;ENST00000556729;ENST00000556550;ENST00000344777;ENST00000553600;ENST00000432832	dehydrogenase/reductase 2 [Source:HGNC Symbol;Acc:HGNC:18349]	protein_coding;retained_intron;processed_transcript	0.303783	-1.71889	0.000562838	down
ENSG00000145692	BHMT	ENST00000274353;ENST00000521279;ENST00000524080;ENST00000520703;ENST00000523508;ENST00000520335	betaine--homocysteine S-methyltransferase [Source:HGNC Symbol;Acc:HGNC:1047]	protein_coding;retained_intron	0.304085	-1.71745	3.96057e-05	down
ENSG00000172197	MBOAT1	ENST00000324607	membrane bound O-acyltransferase domain containing 1 [Source:HGNC Symbol;Acc:HGNC:21579]	protein_coding	0.304523	-1.71538	8.54143e-05	down
ENSG00000187017	ESPN	ENST00000645284;ENST00000418286;ENST00000475228;ENST00000434576;ENST00000633651;ENST00000416731;ENST00000468561;ENST00000477679;ENST00000478323;ENST00000632803;ENST00000636330;ENST00000632142;ENST00000633239;ENST00000632593;ENST00000636644;ENST00000475479;ENST00000461727	espin [Source:HGNC Symbol;Acc:HGNC:13281]	protein_coding;processed_transcript;retained_intron	0.304554	-1.71523	0.000535429	down
ENSG00000175874	CREG2	ENST00000324768;ENST00000495455;ENST00000486966	cellular repressor of E1A stimulated genes 2 [Source:HGNC Symbol;Acc:HGNC:14272]	protein_coding;processed_transcript	0.305597	-1.7103	0.0017583	down
ENSG00000166426	CRABP1	ENST00000299529;ENST00000406419;ENST00000560753	cellular retinoic acid binding protein 1 [Source:HGNC Symbol;Acc:HGNC:2338]	protein_coding;nonsense_mediated_decay;retained_intron	0.306387	-1.70658	2.58703e-19	down
ENSG00000141448	GATA6	ENST00000269216;ENST00000581694	GATA binding protein 6 [Source:HGNC Symbol;Acc:HGNC:4174]	protein_coding	0.306805	-1.70461	0.000664495	down
ENSG00000185567	AHNAK2	ENST00000555544;ENST00000333244;ENST00000555122;ENST00000557457	AHNAK nucleoprotein 2 [Source:HGNC Symbol;Acc:HGNC:20125]	retained_intron;protein_coding	0.307313	-1.70222	2.57503e-17	down
ENSG00000183597	TANGO2	ENST00000399807;ENST00000327374;ENST00000444651;ENST00000434570;ENST00000490121;ENST00000479679;ENST00000430807;ENST00000401833;ENST00000434168;ENST00000432883;ENST00000398042;ENST00000432198;ENST00000490583;ENST00000471707;ENST00000401886;ENST00000475446;ENST00000462579;ENST00000456048;ENST00000411907;ENST00000476940;ENST00000484373;ENST00000420290;ENST00000485715;ENST00000450019;ENST00000447208…	transport and golgi organization 2 homolog [Source:HGNC Symbol;Acc:HGNC:25439]	nonsense_mediated_decay;protein_coding;processed_transcript;retained_intron	0.307485	-1.70141	2.56924e-05	down
ENSG00000111816	FRK	ENST00000606080	fyn related Src family tyrosine kinase [Source:HGNC Symbol;Acc:HGNC:3955]	protein_coding	0.307719	-1.70031	1.84906e-05	down
ENSG00000172575	RASGRP1	ENST00000310803;ENST00000558432;ENST00000558418;ENST00000450598;ENST00000557875;ENST00000560425;ENST00000558164;ENST00000561180;ENST00000539159;ENST00000561117;ENST00000559830;ENST00000560929;ENST00000414708	RAS guanyl releasing protein 1 [Source:HGNC Symbol;Acc:HGNC:9878]	protein_coding;nonsense_mediated_decay	0.308167	-1.69821	2.36454e-08	down
ENSG00000174576	NPAS4	ENST00000311034;ENST00000524617;ENST00000639555;ENST00000525148	neuronal PAS domain protein 4 [Source:HGNC Symbol;Acc:HGNC:18983]	protein_coding;retained_intron;nonsense_mediated_decay	0.3089	-1.69479	0.00164845	down
ENSG00000116711	PLA2G4A	ENST00000367466;ENST00000466600	phospholipase A2 group IVA [Source:HGNC Symbol;Acc:HGNC:9035]	protein_coding;processed_transcript	0.310321	-1.68817	0.000400567	down
ENSG00000099715	PCDH11Y	ENST00000622698;ENST00000333703;ENST00000621505;ENST00000215473;ENST00000362095;ENST00000400457;ENST00000620615	protocadherin 11 Y-linked [Source:HGNC Symbol;Acc:HGNC:15813]	protein_coding;processed_transcript	0.31039	-1.68784	0.0129755	down
ENSG00000179841	AKAP5	ENST00000394718;ENST00000320636	A-kinase anchoring protein 5 [Source:HGNC Symbol;Acc:HGNC:375]	protein_coding	0.31068	-1.6865	4.75227e-05	down
ENSG00000179627	ZBTB42	ENST00000342537;ENST00000555360	zinc finger and BTB domain containing 42 [Source:HGNC Symbol;Acc:HGNC:32550]	protein_coding	0.312119	-1.67983	3.68833e-05	down
ENSG00000188779	SKOR1	ENST00000341418;ENST00000380035;ENST00000554054;ENST00000554240	SKI family transcriptional corepressor 1 [Source:HGNC Symbol;Acc:HGNC:21326]	protein_coding	0.313356	-1.67413	0.0033253	down
ENSG00000138449	SLC40A1	ENST00000261024;ENST00000479598;ENST00000455320;ENST00000427241;ENST00000418714;ENST00000427419;ENST00000440626	solute carrier family 40 member 1 [Source:HGNC Symbol;Acc:HGNC:10909]	protein_coding;retained_intron;processed_transcript	0.313798	-1.67209	0.000273457	down
ENSG00000169946	ZFPM2	ENST00000407775;ENST00000520492;ENST00000522160;ENST00000518180;ENST00000520027;ENST00000517361;ENST00000511341;ENST00000521923;ENST00000524235;ENST00000522296	zinc finger protein, FOG family member 2 [Source:HGNC Symbol;Acc:HGNC:16700]	protein_coding;processed_transcript	0.313918	-1.67154	0.0151505	down
ENSG00000074660	SCARF1	ENST00000263071;ENST00000573852;ENST00000570902;ENST00000576012;ENST00000348987;ENST00000573867;ENST00000574545;ENST00000434376;ENST00000571272	scavenger receptor class F member 1 [Source:HGNC Symbol;Acc:HGNC:16820]	protein_coding;nonsense_mediated_decay;retained_intron;processed_transcript	0.314645	-1.6682	0.00221213	down
ENSG00000124145	SDC4	ENST00000372733	syndecan 4 [Source:HGNC Symbol;Acc:HGNC:10661]	protein_coding	0.315001	-1.66657	9.36307e-20	down
ENSG00000187498	COL4A1	ENST00000375820;ENST00000649738;ENST00000649720;ENST00000615732;ENST00000647797;ENST00000649484;ENST00000650566;ENST00000650424;ENST00000648695;ENST00000543140;ENST00000467182;ENST00000474391;ENST00000650138;ENST00000648966;ENST00000647632;ENST00000648170;ENST00000650115;ENST00000648989	collagen type IV alpha 1 chain [Source:HGNC Symbol;Acc:HGNC:2202]	protein_coding;retained_intron	0.315578	-1.66393	1.057e-20	down
ENSG00000133477	FAM83F	ENST00000333407;ENST00000473717;ENST00000488874	family with sequence similarity 83 member F [Source:HGNC Symbol;Acc:HGNC:25148]	protein_coding;processed_transcript	0.315989	-1.66205	0.0239292	down
ENSG00000240583	AQP1	ENST00000441328;ENST00000409899;ENST00000482461;ENST00000651610;ENST00000652692;ENST00000652696;ENST00000311813;ENST00000409611	aquaporin 1 (Colton blood group) [Source:HGNC Symbol;Acc:HGNC:633]	protein_coding;processed_transcript	0.316223	-1.66099	0.0408578	down
ENSG00000162722	TRIM58	ENST00000366481	tripartite motif containing 58 [Source:HGNC Symbol;Acc:HGNC:24150]	protein_coding	0.316457	-1.65992	0.000103323	down
ENSG00000113645	WWC1	ENST00000521089;ENST00000265293;ENST00000524228;ENST00000524038;ENST00000393895;ENST00000523043;ENST00000519859;ENST00000624315;ENST00000517425;ENST00000517646;ENST00000522140;ENST00000518204;ENST00000524093;ENST00000519659;ENST00000521391;ENST00000518334	WW and C2 domain containing 1 [Source:HGNC Symbol;Acc:HGNC:29435]	protein_coding;processed_transcript;TEC;retained_intron	0.316823	-1.65825	1.18838e-14	down
ENSG00000161896	IP6K3	ENST00000293756;ENST00000451316;ENST00000634274	inositol hexakisphosphate kinase 3 [Source:HGNC Symbol;Acc:HGNC:17269]	protein_coding	0.318861	-1.649	1.15802e-05	down
ENSG00000129422	MTUS1	ENST00000381869;ENST00000524044;ENST00000634613;ENST00000517413;ENST00000523471;ENST00000518713;ENST00000519263;ENST00000519066;ENST00000518138;ENST00000517818;ENST00000520196;ENST00000518891;ENST00000521772;ENST00000297488;ENST00000262102;ENST00000518889;ENST00000518792;ENST00000544260;ENST00000523183;ENST00000518755;ENST00000521635;ENST00000381861;ENST00000522149;ENST00000521882;ENST00000518975…	microtubule associated scaffold protein 1 [Source:HGNC Symbol;Acc:HGNC:29789]	protein_coding;processed_transcript;retained_intron;nonsense_mediated_decay	0.319332	-1.64687	5.98843e-06	down
ENSG00000140575	IQGAP1	ENST00000633485;ENST00000561086;ENST00000561461;ENST00000558957;ENST00000268182;ENST00000560733;ENST00000559682;ENST00000558003;ENST00000559674;ENST00000558491;ENST00000560020;ENST00000560738;ENST00000560418;ENST00000559809;ENST00000559031;ENST00000560373;ENST00000560218;ENST00000561132	IQ motif containing GTPase activating protein 1 [Source:HGNC Symbol;Acc:HGNC:6110]	nonsense_mediated_decay;retained_intron;protein_coding;processed_transcript	0.319552	-1.64588	4.46528e-23	down
ENSG00000137962	ARHGAP29	ENST00000260526;ENST00000482481;ENST00000370217;ENST00000546444;ENST00000552844	Rho GTPase activating protein 29 [Source:HGNC Symbol;Acc:HGNC:30207]	protein_coding;processed_transcript;retained_intron;nonsense_mediated_decay	0.319683	-1.64528	4.97424e-18	down
ENSG00000126803	HSPA2	ENST00000247207;ENST00000554883;ENST00000394709	heat shock protein family A (Hsp70) member 2 [Source:HGNC Symbol;Acc:HGNC:5235]	protein_coding;processed_transcript	0.319722	-1.64511	0.0006909	down
ENSG00000203805	PLPP4	ENST00000398250;ENST00000369073;ENST00000496437	phospholipid phosphatase 4 [Source:HGNC Symbol;Acc:HGNC:23531]	protein_coding;processed_transcript	0.32009	-1.64345	0.00407547	down
ENSG00000162783	IER5	ENST00000367577	immediate early response 5 [Source:HGNC Symbol;Acc:HGNC:5393]	protein_coding	0.320354	-1.64226	2.11712e-12	down
ENSG00000062096	ARSF	ENST00000381127;ENST00000359361	arylsulfatase F [Source:HGNC Symbol;Acc:HGNC:721]	protein_coding	0.320421	-1.64196	0.000202385	down
ENSG00000126016	AMOT	ENST00000371962;ENST00000304758;ENST00000371959;ENST00000462114;ENST00000524145;ENST00000371958	angiomotin [Source:HGNC Symbol;Acc:HGNC:17810]	protein_coding;processed_transcript	0.320697	-1.64072	1.25415e-23	down
ENSG00000146833	TRIM4	ENST00000354241;ENST00000349062;ENST00000496896;ENST00000447480;ENST00000355947	tripartite motif containing 4 [Source:HGNC Symbol;Acc:HGNC:16275]	protein_coding;retained_intron	0.322434	-1.63292	4.24e-10	down
ENSG00000133466	C1QTNF6	ENST00000493023;ENST00000397110;ENST00000337843;ENST00000470655;ENST00000467564;ENST00000497071;ENST00000434784	C1q and TNF related 6 [Source:HGNC Symbol;Acc:HGNC:14343]	retained_intron;protein_coding;processed_transcript	0.322556	-1.63238	3.32897e-06	down
ENSG00000197279	ZNF165	ENST00000377325	zinc finger protein 165 [Source:HGNC Symbol;Acc:HGNC:12953]	protein_coding	0.322821	-1.63119	7.31648e-05	down
ENSG00000099889	ARVCF	ENST00000263207;ENST00000462319;ENST00000495096;ENST00000473551;ENST00000487793;ENST00000406522;ENST00000401994;ENST00000406259;ENST00000492625;ENST00000480792;ENST00000467828	ARVCF delta catenin family member [Source:HGNC Symbol;Acc:HGNC:728]	protein_coding;processed_transcript;retained_intron	0.322915	-1.63078	1.00262e-18	down
ENSG00000151014	NOCT	ENST00000280614;ENST00000515616;ENST00000630479	nocturnin [Source:HGNC Symbol;Acc:HGNC:14254]	protein_coding;retained_intron;nonsense_mediated_decay	0.323156	-1.6297	9.12853e-10	down
ENSG00000134954	ETS1	ENST00000526145;ENST00000392668;ENST00000535549;ENST00000319397;ENST00000530924;ENST00000608978;ENST00000531611;ENST00000525404;ENST00000527676	ETS proto-oncogene 1, transcription factor [Source:HGNC Symbol;Acc:HGNC:3488]	protein_coding;retained_intron;processed_transcript	0.323912	-1.62632	2.15089e-16	down
ENSG00000106565	TMEM176B	ENST00000326442;ENST00000429904;ENST00000450753;ENST00000434545;ENST00000447204;ENST00000492607	transmembrane protein 176B [Source:HGNC Symbol;Acc:HGNC:29596]	protein_coding	0.324012	-1.62588	0.000301922	down
ENSG00000077009	NMRK2	ENST00000168977;ENST00000616156;ENST00000597889;ENST00000593949;ENST00000599576	nicotinamide riboside kinase 2 [Source:HGNC Symbol;Acc:HGNC:17871]	protein_coding;nonsense_mediated_decay	0.324158	-1.62523	0.000196434	down
ENSG00000105974	CAV1	ENST00000393467;ENST00000341049;ENST00000614113;ENST00000393470;ENST00000405348;ENST00000456473;ENST00000489856;ENST00000451122;ENST00000393468	caveolin 1 [Source:HGNC Symbol;Acc:HGNC:1527]	protein_coding;retained_intron;nonsense_mediated_decay	0.324205	-1.62502	7.04605e-08	down
ENSG00000107438	PDLIM1	ENST00000329399;ENST00000492511;ENST00000477757;ENST00000493949;ENST00000490391	PDZ and LIM domain 1 [Source:HGNC Symbol;Acc:HGNC:2067]	protein_coding;processed_transcript	0.324427	-1.62404	9.88676e-21	down
ENSG00000121207	LRAT	ENST00000510733;ENST00000510919;ENST00000499392;ENST00000336356;ENST00000507827;ENST00000502525;ENST00000502474;ENST00000500890	lecithin retinol acyltransferase [Source:HGNC Symbol;Acc:HGNC:6685]	retained_intron;processed_transcript;protein_coding	0.324493	-1.62374	0.000925642	down
ENSG00000149527	PLCH2	ENST00000462379;ENST00000449969;ENST00000278878;ENST00000473964;ENST00000378486;ENST00000609981;ENST00000343889;ENST00000419816	phospholipase C eta 2 [Source:HGNC Symbol;Acc:HGNC:29037]	retained_intron;protein_coding	0.324934	-1.62178	2.93686e-06	down
ENSG00000134802	SLC43A3	ENST00000395124;ENST00000625097;ENST00000529554;ENST00000529748;ENST00000533524;ENST00000395123;ENST00000532278;ENST00000529112;ENST00000528187;ENST00000530005;ENST00000525205;ENST00000524863;ENST00000526125;ENST00000526621;ENST00000352187;ENST00000533245;ENST00000529113;ENST00000532795;ENST00000525474;ENST00000528098;ENST00000529494;ENST00000530316;ENST00000533051;ENST00000529896;ENST00000533235…	solute carrier family 43 member 3 [Source:HGNC Symbol;Acc:HGNC:17466]	protein_coding;TEC;nonsense_mediated_decay;processed_transcript	0.325706	-1.61836	7.72155e-10	down
ENSG00000088387	DOCK9	ENST00000427887;ENST00000340449;ENST00000419908;ENST00000627024;ENST00000400228;ENST00000442173;ENST00000376460;ENST00000472874;ENST00000630992;ENST00000473165;ENST00000448493;ENST00000449796;ENST00000339416;ENST00000479769;ENST00000652315;ENST00000481051;ENST00000638020;ENST00000450257;ENST00000451563	dedicator of cytokinesis 9 [Source:HGNC Symbol;Acc:HGNC:14132]	protein_coding;processed_transcript;nonsense_mediated_decay;retained_intron	0.326135	-1.61646	3.46468e-14	down
ENSG00000099960	SLC7A4	ENST00000382932;ENST00000426145;ENST00000403586	solute carrier family 7 member 4 [Source:HGNC Symbol;Acc:HGNC:11062]	protein_coding	0.326368	-1.61543	0.00140228	down
ENSG00000157992	KRTCAP3	ENST00000464699;ENST00000288873;ENST00000452499;ENST00000407293;ENST00000494572;ENST00000543753;ENST00000453171	keratinocyte associated protein 3 [Source:HGNC Symbol;Acc:HGNC:28943]	retained_intron;protein_coding;nonsense_mediated_decay	0.32639	-1.61533	0.00260873	down
ENSG00000167460	TPM4	ENST00000658224;ENST00000646974;ENST00000664983;ENST00000586193;ENST00000344824;ENST00000645471;ENST00000643579;ENST00000591226;ENST00000663894;ENST00000588032;ENST00000646575;ENST00000588483;ENST00000658489;ENST00000670382;ENST00000659595;ENST00000653979;ENST00000642789;ENST00000590180;ENST00000643494;ENST00000592138;ENST00000300933;ENST00000642221;ENST00000587201;ENST00000657915;ENST00000647037…	tropomyosin 4 [Source:HGNC Symbol;Acc:HGNC:12013]	retained_intron;protein_coding;nonsense_mediated_decay;processed_transcript	0.328043	-1.60804	7.77133e-10	down
ENSG00000150556	LYPD6B	ENST00000409642;ENST00000409876;ENST00000409029;ENST00000437627;ENST00000473975;ENST00000480545;ENST00000442722;ENST00000280115;ENST00000450639;ENST00000473800;ENST00000498249	LY6/PLAUR domain containing 6B [Source:HGNC Symbol;Acc:HGNC:27018]	protein_coding;nonsense_mediated_decay;processed_transcript	0.328131	-1.60766	1.63011e-05	down
ENSG00000022556	NLRP2	ENST00000339757;ENST00000537859;ENST00000448584;ENST00000542755;ENST00000540597;ENST00000543010;ENST00000397169;ENST00000540005;ENST00000543277;ENST00000381637;ENST00000539848;ENST00000433772;ENST00000588619;ENST00000585500;ENST00000588107;ENST00000391721;ENST00000263437;ENST00000427260;ENST00000586512	NLR family pyrin domain containing 2 [Source:HGNC Symbol;Acc:HGNC:22948]	protein_coding;retained_intron;nonsense_mediated_decay;processed_transcript	0.328749	-1.60494	4.04155e-22	down
ENSG00000128849	CGNL1	ENST00000281282;ENST00000559194;ENST00000557813	cingulin like 1 [Source:HGNC Symbol;Acc:HGNC:25931]	protein_coding;processed_transcript	0.329037	-1.60368	6.65899e-18	down
ENSG00000137124	ALDH1B1	ENST00000377698;ENST00000635162	aldehyde dehydrogenase 1 family member B1 [Source:HGNC Symbol;Acc:HGNC:407]	protein_coding	0.32962	-1.60113	4.44686e-16	down
ENSG00000169116	PARM1	ENST00000307428;ENST00000513238	prostate androgen-regulated mucin-like protein 1 [Source:HGNC Symbol;Acc:HGNC:24536]	protein_coding	0.32964	-1.60104	1.13817e-14	down
ENSG00000065923	SLC9A7	ENST00000616978;ENST00000489574;ENST00000491894;ENST00000464933;ENST00000328306	solute carrier family 9 member A7 [Source:HGNC Symbol;Acc:HGNC:17123]	protein_coding;processed_transcript	0.330539	-1.59711	1.08233e-15	down
ENSG00000166145	SPINT1	ENST00000564375;ENST00000562057;ENST00000344051;ENST00000568200;ENST00000566928;ENST00000563656;ENST00000563135;ENST00000569589;ENST00000566642;ENST00000568580;ENST00000568823	serine peptidase inhibitor, Kunitz type 1 [Source:HGNC Symbol;Acc:HGNC:11246]	protein_coding;retained_intron	0.331402	-1.59334	5.64093e-20	down
ENSG00000111145	ELK3	ENST00000228741;ENST00000547249;ENST00000549529;ENST00000547860;ENST00000552142;ENST00000549985	ETS transcription factor ELK3 [Source:HGNC Symbol;Acc:HGNC:3325]	protein_coding;processed_transcript;nonsense_mediated_decay	0.332148	-1.5901	4.22514e-11	down
ENSG00000137872	SEMA6D	ENST00000316364;ENST00000354744;ENST00000558816;ENST00000389428;ENST00000358066;ENST00000561106;ENST00000536845;ENST00000558014;ENST00000389425;ENST00000559196;ENST00000355997;ENST00000559184;ENST00000561133;ENST00000558431;ENST00000560006;ENST00000560636;ENST00000559064	semaphorin 6D [Source:HGNC Symbol;Acc:HGNC:16770]	protein_coding;retained_intron	0.332475	-1.58868	1.21925e-13	down
ENSG00000189221	MAOA	ENST00000338702;ENST00000542639;ENST00000490604;ENST00000497485	monoamine oxidase A [Source:HGNC Symbol;Acc:HGNC:6833]	protein_coding;processed_transcript	0.333413	-1.58462	3.68157e-05	down
ENSG00000147050	KDM6A	ENST00000675157;ENST00000674541;ENST00000675816;ENST00000382899;ENST00000676343;ENST00000675182;ENST00000611820;ENST00000674564;ENST00000675546;ENST00000536777;ENST00000675577;ENST00000543216;ENST00000674739;ENST00000479423;ENST00000675514;ENST00000377967;ENST00000675440;ENST00000675525;ENST00000674586;ENST00000475233;ENST00000621147;ENST00000676026;ENST00000674867;ENST00000676062;ENST00000431196…	lysine demethylase 6A [Source:HGNC Symbol;Acc:HGNC:12637]	retained_intron;nonsense_mediated_decay;protein_coding	0.334203	-1.5812	2.30371e-20	down
ENSG00000107201	DDX58	ENST00000379883;ENST00000379868	DExD/H-box helicase 58 [Source:HGNC Symbol;Acc:HGNC:19102]	protein_coding	0.334222	-1.58112	1.05647e-07	down
ENSG00000101162	TUBB1	ENST00000217133	tubulin beta 1 class VI [Source:HGNC Symbol;Acc:HGNC:16257]	protein_coding	0.334433	-1.58021	0.0258554	down
ENSG00000215012	RTL10	ENST00000405640;ENST00000407472;ENST00000328554;ENST00000416337;ENST00000484072	retrotransposon Gag like 10 [Source:HGNC Symbol;Acc:HGNC:26112]	protein_coding;processed_transcript	0.334486	-1.57998	1.85941e-12	down
ENSG00000184144	CNTN2	ENST00000331830;ENST00000638715;ENST00000636312;ENST00000532366;ENST00000525433;ENST00000639122;ENST00000638577;ENST00000639971;ENST00000481872;ENST00000640326;ENST00000639503;ENST00000640352;ENST00000639354;ENST00000640428;ENST00000640714;ENST00000638449;ENST00000639788;ENST00000530117;ENST00000639023;ENST00000527340;ENST00000639015;ENST00000638928;ENST00000639843;ENST00000639156;ENST00000638050…	contactin 2 [Source:HGNC Symbol;Acc:HGNC:2172]	protein_coding;retained_intron;nonsense_mediated_decay;processed_transcript	0.334808	-1.57859	1.33817e-05	down
ENSG00000154127	UBASH3B	ENST00000284273;ENST00000526493;ENST00000529998;ENST00000530917;ENST00000525711;ENST00000533451;ENST00000530578;ENST00000526386	ubiquitin associated and SH3 domain containing B [Source:HGNC Symbol;Acc:HGNC:29884]	protein_coding;retained_intron;processed_transcript	0.334875	-1.57831	5.29155e-12	down
ENSG00000155066	PROM2	ENST00000317620;ENST00000403131;ENST00000462029;ENST00000478295;ENST00000497110;ENST00000463580;ENST00000431567;ENST00000477767;ENST00000495540;ENST00000317668;ENST00000487138	prominin 2 [Source:HGNC Symbol;Acc:HGNC:20685]	protein_coding;processed_transcript;retained_intron;nonsense_mediated_decay	0.335147	-1.57713	0.00211864	down
ENSG00000112343	TRIM38	ENST00000357085	tripartite motif containing 38 [Source:HGNC Symbol;Acc:HGNC:10059]	protein_coding	0.335639	-1.57502	1.5385e-06	down
ENSG00000125898	FAM110A	ENST00000381941;ENST00000541082;ENST00000505691;ENST00000246100;ENST00000304189;ENST00000381939	family with sequence similarity 110 member A [Source:HGNC Symbol;Acc:HGNC:16188]	protein_coding	0.336068	-1.57318	1.41797e-08	down
ENSG00000104722	NEFM	ENST00000433454;ENST00000221166;ENST00000437366;ENST00000523467;ENST00000518131;ENST00000521540	neurofilament medium [Source:HGNC Symbol;Acc:HGNC:7734]	protein_coding;processed_transcript	0.336248	-1.5724	7.89234e-09	down
ENSG00000108375	RNF43	ENST00000407977;ENST00000584437;ENST00000583753;ENST00000577625;ENST00000580014;ENST00000581868;ENST00000582293;ENST00000577716	ring finger protein 43 [Source:HGNC Symbol;Acc:HGNC:18505]	protein_coding;processed_transcript;retained_intron	0.336765	-1.57018	1.73145e-05	down
ENSG00000258405	ZNF578	ENST00000421239;ENST00000601120	zinc finger protein 578 [Source:HGNC Symbol;Acc:HGNC:26449]	protein_coding	0.338874	-1.56118	0.00247009	down
ENSG00000185668	POU3F1	ENST00000373012	POU class 3 homeobox 1 [Source:HGNC Symbol;Acc:HGNC:9214]	protein_coding	0.338881	-1.56115	3.14007e-10	down
ENSG00000056558	TRAF1	ENST00000540010;ENST00000373887;ENST00000546084	TNF receptor associated factor 1 [Source:HGNC Symbol;Acc:HGNC:12031]	protein_coding	0.338936	-1.56091	5.86522e-06	down
ENSG00000144724	PTPRG	ENST00000485215;ENST00000474889;ENST00000468576;ENST00000295874;ENST00000495879;ENST00000475012;ENST00000475527	protein tyrosine phosphatase receptor type G [Source:HGNC Symbol;Acc:HGNC:9671]	processed_transcript;protein_coding;retained_intron	0.339036	-1.56049	4.97779e-08	down
ENSG00000177551	NHLH2	ENST00000320238;ENST00000369506;ENST00000429731	nescient helix-loop-helix 2 [Source:HGNC Symbol;Acc:HGNC:7818]	protein_coding	0.339291	-1.5594	2.2547e-12	down
ENSG00000133597	ADCK2	ENST00000072869;ENST00000476491;ENST00000483369;ENST00000473512;ENST00000498423	aarF domain containing kinase 2 [Source:HGNC Symbol;Acc:HGNC:19039]	protein_coding;retained_intron	0.339944	-1.55663	6.26197e-09	down
ENSG00000170421	KRT8	ENST00000546583;ENST00000550170;ENST00000552150;ENST00000293308;ENST00000549176;ENST00000547031;ENST00000546921;ENST00000548998;ENST00000546826;ENST00000552551;ENST00000546897;ENST00000619952;ENST00000546542;ENST00000549198;ENST00000547176;ENST00000551318;ENST00000546900	keratin 8 [Source:HGNC Symbol;Acc:HGNC:6446]	retained_intron;protein_coding;processed_transcript;nonsense_mediated_decay	0.340053	-1.55617	1.8908e-22	down
ENSG00000265190	ANXA8	ENST00000611843;ENST00000577813;ENST00000602274;ENST00000583874;ENST00000585281;ENST00000583911;ENST00000602877;ENST00000583448	annexin A8 [Source:HGNC Symbol;Acc:HGNC:546]	protein_coding;nonsense_mediated_decay;processed_transcript;retained_intron	0.340086	-1.55603	0.00533646	down
ENSG00000151892	GFRA1	ENST00000439649;ENST00000355422;ENST00000490345;ENST00000369234;ENST00000369236	GDNF family receptor alpha 1 [Source:HGNC Symbol;Acc:HGNC:4243]	protein_coding;processed_transcript	0.340166	-1.55569	7.48762e-13	down
ENSG00000147144	CCDC120	ENST00000606812;ENST00000603906;ENST00000620388;ENST00000536628;ENST00000597275;ENST00000482476;ENST00000603986;ENST00000496529	coiled-coil domain containing 120 [Source:HGNC Symbol;Acc:HGNC:28910]	protein_coding;nonsense_mediated_decay;retained_intron	0.340596	-1.55387	1.42831e-14	down
ENSG00000136928	GABBR2	ENST00000259455;ENST00000636575;ENST00000477471;ENST00000635462;ENST00000634227;ENST00000637717;ENST00000634919;ENST00000634354;ENST00000634314;ENST00000637410;ENST00000634457;ENST00000638001	gamma-aminobutyric acid type B receptor subunit 2 [Source:HGNC Symbol;Acc:HGNC:4507]	protein_coding;processed_transcript;retained_intron	0.340725	-1.55332	1.03671e-13	down
ENSG00000166913	YWHAB	ENST00000353703;ENST00000479421;ENST00000631616;ENST00000372839;ENST00000428262;ENST00000477896;ENST00000445830;ENST00000633979	tyrosine 3-monooxygenase/tryptophan 5-monooxygenase activation protein beta [Source:HGNC Symbol;Acc:HGNC:12849]	protein_coding;nonsense_mediated_decay;retained_intron	0.340832	-1.55287	2.99647e-09	down
ENSG00000126458	RRAS	ENST00000246792;ENST00000601532	RAS related [Source:HGNC Symbol;Acc:HGNC:10447]	protein_coding;retained_intron	0.340887	-1.55263	2.29936e-10	down
ENSG00000113504	SLC12A7	ENST00000264930;ENST00000513223;ENST00000634447;ENST00000504576;ENST00000510943;ENST00000514994	solute carrier family 12 member 7 [Source:HGNC Symbol;Acc:HGNC:10915]	protein_coding;nonsense_mediated_decay;retained_intron	0.341345	-1.5507	3.69874e-20	down
ENSG00000198189	HSD17B11	ENST00000358290;ENST00000513854;ENST00000508413;ENST00000507286;ENST00000502576;ENST00000507518;ENST00000512344	hydroxysteroid 17-beta dehydrogenase 11 [Source:HGNC Symbol;Acc:HGNC:22960]	protein_coding;retained_intron;processed_transcript	0.341492	-1.55008	1.21405e-05	down
ENSG00000175707	KDF1	ENST00000320567;ENST00000616918	keratinocyte differentiation factor 1 [Source:HGNC Symbol;Acc:HGNC:26624]	protein_coding	0.343093	-1.54333	3.58915e-05	down
ENSG00000205517	RGL3	ENST00000566153;ENST00000393423;ENST00000380456;ENST00000568628;ENST00000567431;ENST00000563726;ENST00000563436;ENST00000566919;ENST00000568420;ENST00000565895;ENST00000561687;ENST00000569439;ENST00000562663;ENST00000567080;ENST00000589032;ENST00000561570;ENST00000453604	ral guanine nucleotide dissociation stimulator like 3 [Source:HGNC Symbol;Acc:HGNC:30282]	retained_intron;protein_coding;processed_transcript;nonsense_mediated_decay	0.343753	-1.54056	3.02016e-05	down
ENSG00000180660	MAB21L1	ENST00000379919	mab-21 like 1 [Source:HGNC Symbol;Acc:HGNC:6757]	protein_coding	0.34445	-1.53763	2.59754e-07	down
ENSG00000181826	RELL1	ENST00000454158;ENST00000512114;ENST00000314117	RELT like 1 [Source:HGNC Symbol;Acc:HGNC:27379]	protein_coding	0.344509	-1.53739	4.55907e-05	down
ENSG00000165071	TMEM71	ENST00000356838;ENST00000522334;ENST00000519304;ENST00000517538;ENST00000524079;ENST00000522780;ENST00000519016;ENST00000523829;ENST00000377901;ENST00000522594;ENST00000519187	transmembrane protein 71 [Source:HGNC Symbol;Acc:HGNC:26572]	protein_coding;processed_transcript;retained_intron	0.344715	-1.53652	0.00812605	down
ENSG00000116574	RHOU	ENST00000366691	ras homolog family member U [Source:HGNC Symbol;Acc:HGNC:17794]	protein_coding	0.344805	-1.53615	1.78167e-15	down
ENSG00000141753	IGFBP4	ENST00000269593	insulin like growth factor binding protein 4 [Source:HGNC Symbol;Acc:HGNC:5473]	protein_coding	0.345194	-1.53452	5.43052e-13	down
ENSG00000144331	ZNF385B	ENST00000410066;ENST00000438871;ENST00000409343;ENST00000495289;ENST00000475539;ENST00000439340;ENST00000336917;ENST00000466398;ENST00000451732;ENST00000409692;ENST00000463918;ENST00000457304;ENST00000469551	zinc finger protein 385B [Source:HGNC Symbol;Acc:HGNC:26332]	protein_coding;processed_transcript	0.345406	-1.53363	6.46788e-07	down
ENSG00000176438	SYNE3	ENST00000557275;ENST00000334258;ENST00000554873;ENST00000555759;ENST00000553340	spectrin repeat containing nuclear envelope family member 3 [Source:HGNC Symbol;Acc:HGNC:19861]	protein_coding;retained_intron	0.345437	-1.53351	8.1388e-05	down
ENSG00000143333	RGS16	ENST00000367558	regulator of G protein signaling 16 [Source:HGNC Symbol;Acc:HGNC:9997]	protein_coding	0.345809	-1.53195	8.42993e-09	down
ENSG00000134363	FST	ENST00000256759;ENST00000504226;ENST00000491717;ENST00000497789;ENST00000396947	follistatin [Source:HGNC Symbol;Acc:HGNC:3971]	protein_coding;retained_intron	0.345819	-1.53191	7.40144e-08	down
ENSG00000128335	APOL2	ENST00000358502;ENST00000489186;ENST00000249066;ENST00000451256;ENST00000529194;ENST00000454728;ENST00000476579;ENST00000484830;ENST00000473549	apolipoprotein L2 [Source:HGNC Symbol;Acc:HGNC:619]	protein_coding;processed_transcript	0.346186	-1.53038	0.000137487	down
ENSG00000100314	CABP7	ENST00000216144	calcium binding protein 7 [Source:HGNC Symbol;Acc:HGNC:20834]	protein_coding	0.346474	-1.52918	2.50807e-05	down
ENSG00000185650	ZFP36L1	ENST00000555997;ENST00000439696;ENST00000336440;ENST00000557022;ENST00000557086;ENST00000553375	ZFP36 ring finger protein like 1 [Source:HGNC Symbol;Acc:HGNC:1107]	protein_coding	0.346991	-1.52703	0.00074927	down
ENSG00000101331	CCM2L	ENST00000452892;ENST00000262659	CCM2 like scaffold protein [Source:HGNC Symbol;Acc:HGNC:16153]	protein_coding	0.347377	-1.52543	0.00495146	down
ENSG00000184702	SEPTIN5	ENST00000438754;ENST00000470814;ENST00000395109;ENST00000383045;ENST00000412544;ENST00000480423;ENST00000406172;ENST00000431124;ENST00000477238;ENST00000490204;ENST00000413258;ENST00000455784;ENST00000406395	septin 5 [Source:HGNC Symbol;Acc:HGNC:9164]	protein_coding;retained_intron;nonsense_mediated_decay;processed_transcript	0.347796	-1.52369	0.0280954	down
ENSG00000113448	PDE4D	ENST00000503258;ENST00000405755;ENST00000340635;ENST00000360047;ENST00000515011;ENST00000358923;ENST00000509355;ENST00000546160;ENST00000514231;ENST00000515835;ENST00000502484;ENST00000621323;ENST00000317118;ENST00000512069;ENST00000309641;ENST00000638939;ENST00000636120;ENST00000515324;ENST00000507116;ENST00000511382;ENST00000502575;ENST00000405053;ENST00000506024;ENST00000506510;ENST00000509368…	phosphodiesterase 4D [Source:HGNC Symbol;Acc:HGNC:8783]	protein_coding;retained_intron;processed_transcript;nonsense_mediated_decay	0.348196	-1.52203	3.37801e-11	down
ENSG00000144677	CTDSPL	ENST00000273179;ENST00000436654;ENST00000443503;ENST00000416688;ENST00000447745;ENST00000310189;ENST00000486978;ENST00000435525	CTD small phosphatase like [Source:HGNC Symbol;Acc:HGNC:16890]	protein_coding;processed_transcript;nonsense_mediated_decay	0.348403	-1.52117	0.00113939	down
ENSG00000100031	GGT1	ENST00000430289;ENST00000403838;ENST00000419133;ENST00000428855;ENST00000490087;ENST00000404920;ENST00000447416;ENST00000438643;ENST00000400380;ENST00000451366;ENST00000456869;ENST00000452551;ENST00000412898;ENST00000404223;ENST00000474191;ENST00000487766;ENST00000455483;ENST00000411974;ENST00000425895;ENST00000404532;ENST00000412658;ENST00000432867;ENST00000400382;ENST00000445029;ENST00000466310…	gamma-glutamyltransferase 1 [Source:HGNC Symbol;Acc:HGNC:4250]	protein_coding;processed_transcript;retained_intron;nonsense_mediated_decay	0.348602	-1.52035	0.0412655	down
ENSG00000125148	MT2A	ENST00000245185;ENST00000562017;ENST00000563985;ENST00000561491;ENST00000567300	metallothionein 2A [Source:HGNC Symbol;Acc:HGNC:7406]	protein_coding;retained_intron;processed_transcript	0.348609	-1.52032	0.000172497	down
ENSG00000046604	DSG2	ENST00000261590;ENST00000585206	desmoglein 2 [Source:HGNC Symbol;Acc:HGNC:3049]	protein_coding	0.348848	-1.51933	7.10234e-18	down
ENSG00000105755	ETHE1	ENST00000602138;ENST00000292147;ENST00000594342;ENST00000600651;ENST00000598330;ENST00000595115	ETHE1 persulfide dioxygenase [Source:HGNC Symbol;Acc:HGNC:23287]	nonsense_mediated_decay;protein_coding;retained_intron	0.348883	-1.51918	5.16267e-09	down
ENSG00000165304	MELK	ENST00000536987;ENST00000541717;ENST00000545008;ENST00000536860;ENST00000298048;ENST00000543751;ENST00000487398;ENST00000480021;ENST00000495529;ENST00000625974;ENST00000626154;ENST00000536329;ENST00000489766;ENST00000627766	maternal embryonic leucine zipper kinase [Source:HGNC Symbol;Acc:HGNC:16870]	protein_coding;processed_transcript;retained_intron;nonsense_mediated_decay	0.349128	-1.51817	9.18953e-14	down
ENSG00000100906	NFKBIA	ENST00000557140;ENST00000557389;ENST00000555371;ENST00000557459;ENST00000216797;ENST00000556664;ENST00000555629;ENST00000557100;ENST00000554001;ENST00000553342	NFKB inhibitor alpha [Source:HGNC Symbol;Acc:HGNC:7797]	protein_coding;retained_intron;processed_transcript;nonsense_mediated_decay	0.349233	-1.51774	2.8543e-12	down
ENSG00000112139	MDGA1	ENST00000650466;ENST00000434837;ENST00000373401;ENST00000478143;ENST00000510077;ENST00000505425;ENST00000515437;ENST00000508399;ENST00000418178;ENST00000502298;ENST00000503419	MAM domain containing glycosylphosphatidylinositol anchor 1 [Source:HGNC Symbol;Acc:HGNC:19267]	protein_coding;retained_intron;processed_transcript;nonsense_mediated_decay	0.349255	-1.51765	3.58752e-09	down
ENSG00000100092	SH3BP1	ENST00000649765;ENST00000643339;ENST00000644149;ENST00000417536;ENST00000469947;ENST00000649107;ENST00000471650;ENST00000459646;ENST00000495174;ENST00000466097	SH3 domain binding protein 1 [Source:HGNC Symbol;Acc:HGNC:10824]	protein_coding;processed_transcript;nonsense_mediated_decay;retained_intron;non_stop_decay	0.349382	-1.51712	1.11689e-08	down
ENSG00000148180	GSN	ENST00000545652;ENST00000432226;ENST00000373807;ENST00000373808;ENST00000373823;ENST00000373818;ENST00000477553;ENST00000477104;ENST00000477863;ENST00000434663;ENST00000394353;ENST00000485767;ENST00000373806;ENST00000483960;ENST00000449733	gelsolin [Source:HGNC Symbol;Acc:HGNC:4620]	protein_coding;retained_intron;processed_transcript;nonsense_mediated_decay	0.349873	-1.5151	1.9768e-17	down
ENSG00000170745	KCNS3	ENST00000304101;ENST00000403915;ENST00000481414;ENST00000465292;ENST00000419802	potassium voltage-gated channel modifier subfamily S member 3 [Source:HGNC Symbol;Acc:HGNC:6302]	protein_coding;processed_transcript	0.350166	-1.51389	9.65277e-06	down
ENSG00000182050	MGAT4C	ENST00000611864;ENST00000621808;ENST00000551921;ENST00000552435;ENST00000602941;ENST00000548651;ENST00000552808;ENST00000620241;ENST00000550365;ENST00000551751;ENST00000547225	MGAT4 family member C [Source:HGNC Symbol;Acc:HGNC:30871]	protein_coding;processed_transcript	0.350334	-1.5132	0.000754277	down
ENSG00000169184	MN1	ENST00000302326;ENST00000497225;ENST00000424656	MN1 proto-oncogene, transcriptional regulator [Source:HGNC Symbol;Acc:HGNC:7180]	protein_coding;processed_transcript;nonsense_mediated_decay	0.350842	-1.51111	2.01741e-12	down
ENSG00000157103	SLC6A1	ENST00000643396;ENST00000462473;ENST00000642639;ENST00000646836;ENST00000646702;ENST00000645575;ENST00000645985;ENST00000644314;ENST00000642766;ENST00000643498;ENST00000646060;ENST00000646886;ENST00000646072;ENST00000646022;ENST00000646035;ENST00000645776;ENST00000645974;ENST00000460480;ENST00000646487;ENST00000646088;ENST00000646924;ENST00000645592;ENST00000642735;ENST00000642767;ENST00000645054…	solute carrier family 6 member 1 [Source:HGNC Symbol;Acc:HGNC:11042]	protein_coding;retained_intron;nonsense_mediated_decay	0.351444	-1.50863	0.0079952	down
ENSG00000176842	IRX5	ENST00000394636;ENST00000558597;ENST00000560154;ENST00000620085;ENST00000320990	iroquois homeobox 5 [Source:HGNC Symbol;Acc:HGNC:14361]	protein_coding;retained_intron	0.352157	-1.50571	0.000348756	down
ENSG00000130787	HIP1R	ENST00000253083;ENST00000536847;ENST00000536617;ENST00000535831;ENST00000452196;ENST00000536772;ENST00000538236;ENST00000537322;ENST00000541712;ENST00000535012	huntingtin interacting protein 1 related [Source:HGNC Symbol;Acc:HGNC:18415]	protein_coding;retained_intron;processed_transcript	0.352339	-1.50497	1.0834e-12	down
ENSG00000204131	NHSL2	ENST00000633930;ENST00000632230;ENST00000623354;ENST00000639939;ENST00000373677;ENST00000631833;ENST00000631375;ENST00000510661	NHS like 2 [Source:HGNC Symbol;Acc:HGNC:33737]	protein_coding;processed_transcript;retained_intron	0.352459	-1.50447	3.76714e-09	down
ENSG00000075891	PAX2	ENST00000361791;ENST00000370296;ENST00000428433;ENST00000355243;ENST00000553492;ENST00000483202;ENST00000554172;ENST00000554363;ENST00000427256	paired box 2 [Source:HGNC Symbol;Acc:HGNC:8616]	protein_coding;processed_transcript;retained_intron	0.352919	-1.50259	6.26942e-06	down
ENSG00000092969	TGFB2	ENST00000366929;ENST00000366930;ENST00000479322;ENST00000488793	transforming growth factor beta 2 [Source:HGNC Symbol;Acc:HGNC:11768]	protein_coding;processed_transcript	0.353159	-1.50161	1.69331e-09	down
ENSG00000111218	PRMT8	ENST00000543701;ENST00000261252;ENST00000382622;ENST00000452611	protein arginine methyltransferase 8 [Source:HGNC Symbol;Acc:HGNC:5188]	retained_intron;processed_transcript;protein_coding	0.354371	-1.49667	8.59465e-06	down
ENSG00000100599	RIN3	ENST00000216487;ENST00000556418;ENST00000553959;ENST00000555589;ENST00000557762;ENST00000553992;ENST00000418924;ENST00000620541;ENST00000554888;ENST00000555891;ENST00000556385;ENST00000555908	Ras and Rab interactor 3 [Source:HGNC Symbol;Acc:HGNC:18751]	protein_coding;processed_transcript;nonsense_mediated_decay;retained_intron	0.354411	-1.49651	8.05842e-05	down
ENSG00000186417	GLDN	ENST00000335449;ENST00000558426;ENST00000561194;ENST00000558286;ENST00000559317;ENST00000560215;ENST00000560690;ENST00000396399;ENST00000464150;ENST00000612989	gliomedin [Source:HGNC Symbol;Acc:HGNC:29514]	protein_coding;retained_intron	0.355561	-1.49183	0.00563957	down
ENSG00000141452	RMC1	ENST00000589215;ENST00000590870;ENST00000269221;ENST00000593081;ENST00000589409;ENST00000590868;ENST00000615148;ENST00000592119;ENST00000589860;ENST00000590387;ENST00000591367;ENST00000587690;ENST00000587153;ENST00000592682	regulator of MON1-CCZ1 [Source:HGNC Symbol;Acc:HGNC:24326]	nonsense_mediated_decay;protein_coding;retained_intron;processed_transcript	0.355867	-1.49059	3.83536e-15	down
ENSG00000149926	TLCD3B	ENST00000380495;ENST00000564806;ENST00000567037;ENST00000569508;ENST00000279389;ENST00000561666;ENST00000571269	TLC domain containing 3B [Source:HGNC Symbol;Acc:HGNC:25295]	protein_coding;processed_transcript;nonsense_mediated_decay	0.355913	-1.49041	8.51729e-13	down
ENSG00000132205	EMILIN2	ENST00000254528;ENST00000308080;ENST00000583776	elastin microfibril interfacer 2 [Source:HGNC Symbol;Acc:HGNC:19881]	protein_coding;processed_transcript;retained_intron	0.355935	-1.49031	9.15346e-08	down
ENSG00000151917	BEND6	ENST00000370748;ENST00000370746;ENST00000370745;ENST00000484701	BEN domain containing 6 [Source:HGNC Symbol;Acc:HGNC:20871]	protein_coding;processed_transcript	0.356224	-1.48914	2.42926e-06	down
ENSG00000188897	AC099489	ENST00000598234;ENST00000612858;ENST00000600877;ENST00000595170;ENST00000595168;ENST00000599216;ENST00000600548;ENST00000596416	novel lipoprotein amino terminal region containing protein	protein_coding;retained_intron;nonsense_mediated_decay	0.356228	-1.48913	0.0137483	down
ENSG00000198598	MMP17	ENST00000535291;ENST00000360564;ENST00000535182;ENST00000545671;ENST00000537848;ENST00000535004;ENST00000542648;ENST00000542142;ENST00000535271;ENST00000534865;ENST00000545790	matrix metallopeptidase 17 [Source:HGNC Symbol;Acc:HGNC:7163]	protein_coding;processed_transcript;nonsense_mediated_decay;retained_intron	0.356317	-1.48877	0.00111548	down
ENSG00000149633	KIAA1755	ENST00000279024;ENST00000496900;ENST00000487506;ENST00000435901;ENST00000611812;ENST00000460881;ENST00000484362	KIAA1755 [Source:HGNC Symbol;Acc:HGNC:29372]	protein_coding;retained_intron	0.356944	-1.48623	0.00366493	down
ENSG00000130176	CNN1	ENST00000592923;ENST00000252456;ENST00000586059;ENST00000588468;ENST00000587087;ENST00000586577;ENST00000535659;ENST00000588935;ENST00000592338;ENST00000585869	calponin 1 [Source:HGNC Symbol;Acc:HGNC:2155]	protein_coding;processed_transcript	0.357509	-1.48395	5.70044e-16	down
ENSG00000118263	KLF7	ENST00000309446;ENST00000412414;ENST00000426163;ENST00000458272;ENST00000435602;ENST00000451244;ENST00000457962;ENST00000421199;ENST00000467833;ENST00000423015	Kruppel like factor 7 [Source:HGNC Symbol;Acc:HGNC:6350]	protein_coding;nonsense_mediated_decay;processed_transcript	0.357655	-1.48336	4.1384e-05	down
ENSG00000181544	FANCB	ENST00000643728;ENST00000398334;ENST00000489126;ENST00000452869;ENST00000646255;ENST00000324138;ENST00000650831	FA complementation group B [Source:HGNC Symbol;Acc:HGNC:3583]	nonsense_mediated_decay;protein_coding;retained_intron	0.358097	-1.48158	0.000313574	down
ENSG00000165272	AQP3	ENST00000494313;ENST00000297991;ENST00000643650;ENST00000645858;ENST00000493581;ENST00000473153;ENST00000463983	aquaporin 3 (Gill blood group) [Source:HGNC Symbol;Acc:HGNC:636]	retained_intron;protein_coding;nonsense_mediated_decay	0.358124	-1.48147	0.0297698	down
ENSG00000188483	IER5L	ENST00000372491	immediate early response 5 like [Source:HGNC Symbol;Acc:HGNC:23679]	protein_coding	0.35851	-1.47992	8.44113e-10	down
ENSG00000171219	CDC42BPG	ENST00000342711;ENST00000480767;ENST00000468512;ENST00000491280	CDC42 binding protein kinase gamma [Source:HGNC Symbol;Acc:HGNC:29829]	protein_coding;retained_intron;processed_transcript	0.359221	-1.47706	3.87641e-10	down
ENSG00000008513	ST3GAL1	ENST00000521180;ENST00000399640;ENST00000522652;ENST00000523854;ENST00000523855;ENST00000522285;ENST00000523634;ENST00000520020;ENST00000648219;ENST00000521627;ENST00000519924;ENST00000522873;ENST00000522204;ENST00000517668;ENST00000518298;ENST00000519435	ST3 beta-galactoside alpha-2,3-sialyltransferase 1 [Source:HGNC Symbol;Acc:HGNC:10862]	protein_coding;processed_transcript;retained_intron	0.360067	-1.47366	1.84905e-17	down
ENSG00000125285	SOX21	ENST00000376945	SRY-box transcription factor 21 [Source:HGNC Symbol;Acc:HGNC:11197]	protein_coding	0.360133	-1.4734	1.60767e-06	down
ENSG00000273706	LHX1	ENST00000614239;ENST00000616237;ENST00000673652;ENST00000619297;ENST00000619939;ENST00000621767	LIM homeobox 1 [Source:HGNC Symbol;Acc:HGNC:6593]	protein_coding;retained_intron;processed_transcript	0.360206	-1.4731	2.08732e-11	down
ENSG00000156218	ADAMTSL3	ENST00000567476;ENST00000286744;ENST00000569510;ENST00000562296;ENST00000565653;ENST00000567716;ENST00000561483;ENST00000567663	ADAMTS like 3 [Source:HGNC Symbol;Acc:HGNC:14633]	protein_coding;retained_intron;processed_transcript	0.360274	-1.47284	6.07749e-05	down
ENSG00000198400	NTRK1	ENST00000524377;ENST00000534682;ENST00000368196;ENST00000530298;ENST00000674537;ENST00000675461;ENST00000392302;ENST00000489021;ENST00000497019;ENST00000531606;ENST00000533630;ENST00000358660	neurotrophic receptor tyrosine kinase 1 [Source:HGNC Symbol;Acc:HGNC:8031]	protein_coding;retained_intron;processed_transcript;nonsense_mediated_decay	0.360358	-1.4725	7.74157e-09	down
ENSG00000214376	VSTM5	ENST00000409977;ENST00000414919;ENST00000398221	V-set and transmembrane domain containing 5 [Source:HGNC Symbol;Acc:HGNC:34443]	protein_coding;retained_intron;nonsense_mediated_decay	0.360536	-1.47179	0.000980656	down
ENSG00000123342	MMP19	ENST00000322569;ENST00000547685;ENST00000548882;ENST00000552872;ENST00000552763;ENST00000409200;ENST00000547299;ENST00000547487;ENST00000548629	matrix metallopeptidase 19 [Source:HGNC Symbol;Acc:HGNC:7165]	protein_coding;retained_intron;nonsense_mediated_decay;processed_transcript	0.360871	-1.47045	0.000304378	down
ENSG00000249992	TMEM158	ENST00000503771	transmembrane protein 158 (gene/pseudogene) [Source:HGNC Symbol;Acc:HGNC:30293]	protein_coding	0.361238	-1.46898	4.5144e-06	down
ENSG00000149300	C11orf52	ENST00000278601;ENST00000529012;ENST00000529342;ENST00000527286	chromosome 11 open reading frame 52 [Source:HGNC Symbol;Acc:HGNC:30531]	protein_coding;retained_intron;processed_transcript	0.361402	-1.46832	0.0154854	down
ENSG00000067082	KLF6	ENST00000497571;ENST00000380946;ENST00000492125;ENST00000469435;ENST00000542957;ENST00000173785;ENST00000461124	Kruppel like factor 6 [Source:HGNC Symbol;Acc:HGNC:2235]	protein_coding;processed_transcript	0.361963	-1.46608	4.30794e-06	down
ENSG00000118971	CCND2	ENST00000261254;ENST00000675880;ENST00000536537;ENST00000676279;ENST00000675468;ENST00000676411;ENST00000536795;ENST00000541542	cyclin D2 [Source:HGNC Symbol;Acc:HGNC:1583]	protein_coding;processed_transcript;retained_intron	0.362205	-1.46512	5.26013e-07	down
ENSG00000143179	UCK2	ENST00000470820;ENST00000642653;ENST00000479872;ENST00000367879;ENST00000469256;ENST00000464197;ENST00000463772;ENST00000462329;ENST00000475333	uridine-cytidine kinase 2 [Source:HGNC Symbol;Acc:HGNC:12562]	protein_coding;retained_intron;processed_transcript	0.362692	-1.46318	5.38755e-07	down
ENSG00000167123	CERCAM	ENST00000372842;ENST00000613052;ENST00000372838;ENST00000463535;ENST00000447915;ENST00000487001;ENST00000420512;ENST00000612334;ENST00000420034;ENST00000483893;ENST00000411852;ENST00000483737;ENST00000472858;ENST00000493788	cerebral endothelial cell adhesion molecule [Source:HGNC Symbol;Acc:HGNC:23723]	protein_coding;retained_intron;processed_transcript	0.363204	-1.46115	7.57672e-08	down
ENSG00000167306	MYO5B	ENST00000285039;ENST00000592688;ENST00000324581;ENST00000586036;ENST00000585859;ENST00000587895;ENST00000589568	myosin VB [Source:HGNC Symbol;Acc:HGNC:7603]	protein_coding;processed_transcript;retained_intron	0.363854	-1.45857	3.70029e-15	down
ENSG00000163975	MELTF	ENST00000473501;ENST00000296351;ENST00000296350;ENST00000491399;ENST00000489445;ENST00000439320;ENST00000469783	melanotransferrin [Source:HGNC Symbol;Acc:HGNC:7037]	retained_intron;protein_coding	0.364367	-1.45653	1.0815e-06	down
ENSG00000175426	PCSK1	ENST00000311106;ENST00000508626;ENST00000509190;ENST00000513085	proprotein convertase subtilisin/kexin type 1 [Source:HGNC Symbol;Acc:HGNC:8743]	protein_coding;processed_transcript	0.365105	-1.45362	4.91456e-06	down
ENSG00000089116	LHX5	ENST00000261731;ENST00000557836	LIM homeobox 5 [Source:HGNC Symbol;Acc:HGNC:14216]	protein_coding;processed_transcript	0.365152	-1.45343	5.92662e-10	down
ENSG00000105880	DLX5	ENST00000648378;ENST00000493764;ENST00000486603	distal-less homeobox 5 [Source:HGNC Symbol;Acc:HGNC:2918]	protein_coding;processed_transcript	0.366112	-1.44964	0.0392537	down
ENSG00000181965	NEUROG1	ENST00000314744	neurogenin 1 [Source:HGNC Symbol;Acc:HGNC:7764]	protein_coding	0.366504	-1.4481	6.44686e-06	down
ENSG00000099917	MED15	ENST00000492381;ENST00000263205;ENST00000292733;ENST00000382974;ENST00000473244;ENST00000493216;ENST00000489651;ENST00000433831;ENST00000428629;ENST00000406969;ENST00000445189;ENST00000414658;ENST00000473028;ENST00000476767;ENST00000441501;ENST00000420849;ENST00000423862;ENST00000476187;ENST00000487550;ENST00000436496;ENST00000444094;ENST00000486656;ENST00000451058;ENST00000461076;ENST00000438962…	mediator complex subunit 15 [Source:HGNC Symbol;Acc:HGNC:14248]	retained_intron;protein_coding;nonsense_mediated_decay;processed_transcript	0.367116	-1.44569	3.70438e-11	down
ENSG00000177103	DSCAML1	ENST00000321322;ENST00000527706;ENST00000651296;ENST00000525836;ENST00000651172	DS cell adhesion molecule like 1 [Source:HGNC Symbol;Acc:HGNC:14656]	protein_coding	0.367534	-1.44405	0.000151821	down
ENSG00000198626	RYR2	ENST00000366574;ENST00000660292;ENST00000659194;ENST00000360064;ENST00000661330;ENST00000466626;ENST00000608590;ENST00000609119;ENST00000462585	ryanodine receptor 2 [Source:HGNC Symbol;Acc:HGNC:10484]	protein_coding;processed_transcript;nonsense_mediated_decay	0.367563	-1.44394	1.67056e-09	down
ENSG00000093009	CDC45	ENST00000438587;ENST00000672837;ENST00000404724;ENST00000263201;ENST00000428937;ENST00000491520;ENST00000471470;ENST00000493724;ENST00000671972;ENST00000437685;ENST00000483431;ENST00000407835;ENST00000487669;ENST00000455750	cell division cycle 45 [Source:HGNC Symbol;Acc:HGNC:1739]	nonsense_mediated_decay;protein_coding;retained_intron;processed_transcript	0.367662	-1.44355	2.87435e-06	down
ENSG00000120756	PLS1	ENST00000457734;ENST00000497199;ENST00000460104;ENST00000475296;ENST00000495744;ENST00000497002;ENST00000483373;ENST00000461644;ENST00000483507;ENST00000337777;ENST00000464320;ENST00000476044	plastin 1 [Source:HGNC Symbol;Acc:HGNC:9090]	protein_coding;retained_intron	0.367947	-1.44243	3.71781e-07	down
ENSG00000148908	RGS10	ENST00000369103;ENST00000392865;ENST00000369101;ENST00000469575;ENST00000473563	regulator of G protein signaling 10 [Source:HGNC Symbol;Acc:HGNC:9992]	protein_coding;processed_transcript	0.368913	-1.43865	4.70087e-07	down
ENSG00000053438	NNAT	ENST00000649451;ENST00000346199;ENST00000649309;ENST00000649697;ENST00000647955	neuronatin [Source:HGNC Symbol;Acc:HGNC:7860]	protein_coding	0.369271	-1.43725	4.19593e-12	down
ENSG00000133121	STARD13	ENST00000336934;ENST00000498019;ENST00000439831;ENST00000491333;ENST00000255486;ENST00000399365;ENST00000344312;ENST00000487412;ENST00000567873	StAR related lipid transfer domain containing 13 [Source:HGNC Symbol;Acc:HGNC:19164]	protein_coding;processed_transcript	0.369463	-1.4365	0.00101866	down
ENSG00000132334	PTPRE	ENST00000479896;ENST00000254667;ENST00000492479;ENST00000471218;ENST00000306042;ENST00000495530;ENST00000455661;ENST00000467366;ENST00000463727;ENST00000487428;ENST00000442830	protein tyrosine phosphatase receptor type E [Source:HGNC Symbol;Acc:HGNC:9669]	nonsense_mediated_decay;protein_coding;retained_intron	0.370173	-1.43373	8.88395e-05	down
ENSG00000065485	PDIA5	ENST00000489923;ENST00000467157;ENST00000316218;ENST00000485208;ENST00000495004;ENST00000469649;ENST00000484644;ENST00000472319	protein disulfide isomerase family A member 5 [Source:HGNC Symbol;Acc:HGNC:24811]	nonsense_mediated_decay;processed_transcript;protein_coding	0.370794	-1.43131	2.28916e-07	down
ENSG00000076356	PLXNA2	ENST00000367033;ENST00000483048;ENST00000480053;ENST00000460870;ENST00000486969;ENST00000463510	plexin A2 [Source:HGNC Symbol;Acc:HGNC:9100]	protein_coding;processed_transcript	0.37134	-1.42919	2.47207e-11	down
ENSG00000086062	B4GALT1	ENST00000379731;ENST00000535206	beta-1,4-galactosyltransferase 1 [Source:HGNC Symbol;Acc:HGNC:924]	protein_coding	0.371381	-1.42903	2.10618e-15	down
ENSG00000204160	ZDHHC18	ENST00000374142;ENST00000488397;ENST00000478902;ENST00000534643;ENST00000374141	zinc finger DHHC-type palmitoyltransferase 18 [Source:HGNC Symbol;Acc:HGNC:20712]	protein_coding;processed_transcript	0.372285	-1.42552	6.85699e-06	down
ENSG00000007171	NOS2	ENST00000646938;ENST00000621962;ENST00000313735	nitric oxide synthase 2 [Source:HGNC Symbol;Acc:HGNC:7873]	protein_coding	0.372722	-1.42383	4.1103e-11	down
ENSG00000204428	LY6G5C	ENST00000375863;ENST00000467098;ENST00000474678;ENST00000460141;ENST00000383237;ENST00000461572;ENST00000474395	lymphocyte antigen 6 family member G5C [Source:HGNC Symbol;Acc:HGNC:13932]	protein_coding;processed_transcript;nonsense_mediated_decay;retained_intron	0.372758	-1.42369	0.00221103	down
ENSG00000117009	KMO	ENST00000366559;ENST00000484229;ENST00000366558;ENST00000481087;ENST00000366555;ENST00000431245;ENST00000366557;ENST00000480967;ENST00000484628;ENST00000477907	kynurenine 3-monooxygenase [Source:HGNC Symbol;Acc:HGNC:6381]	protein_coding;processed_transcript	0.372809	-1.42349	0.00832633	down
ENSG00000130635	COL5A1	ENST00000464187;ENST00000371817;ENST00000618395;ENST00000469093;ENST00000465877;ENST00000463925;ENST00000371820;ENST00000460264	collagen type V alpha 1 chain [Source:HGNC Symbol;Acc:HGNC:2209]	processed_transcript;protein_coding;retained_intron	0.372922	-1.42306	3.22281e-15	down
ENSG00000205302	SNX2	ENST00000514949;ENST00000379516;ENST00000507321;ENST00000505854;ENST00000506847;ENST00000509281;ENST00000507852;ENST00000510372;ENST00000505934;ENST00000511365;ENST00000514030;ENST00000512394;ENST00000506874	sorting nexin 2 [Source:HGNC Symbol;Acc:HGNC:11173]	protein_coding;retained_intron;processed_transcript;nonsense_mediated_decay	0.373266	-1.42172	1.37644e-16	down
ENSG00000090932	DLL3	ENST00000356433;ENST00000205143;ENST00000600437;ENST00000596614;ENST00000600579	delta like canonical Notch ligand 3 [Source:HGNC Symbol;Acc:HGNC:2909]	protein_coding;retained_intron;processed_transcript	0.374225	-1.41802	2.9099e-06	down
ENSG00000125733	TRIP10	ENST00000596758;ENST00000595319;ENST00000600491;ENST00000313285;ENST00000313244;ENST00000598843;ENST00000600677;ENST00000600428;ENST00000595305;ENST00000596673;ENST00000596078;ENST00000596543;ENST00000601303	thyroid hormone receptor interactor 10 [Source:HGNC Symbol;Acc:HGNC:12304]	protein_coding;retained_intron;nonsense_mediated_decay;processed_transcript	0.374262	-1.41788	1.17877e-12	down
ENSG00000113212	PCDHB7	ENST00000231137	protocadherin beta 7 [Source:HGNC Symbol;Acc:HGNC:8692]	protein_coding	0.374639	-1.41643	0.00786701	down
ENSG00000251664	PCDHA12	ENST00000398631;ENST00000613593;ENST00000673403	protocadherin alpha 12 [Source:HGNC Symbol;Acc:HGNC:8666]	protein_coding;nonsense_mediated_decay	0.375042	-1.41487	3.51274e-07	down
ENSG00000162951	LRRTM1	ENST00000295057;ENST00000433224;ENST00000452811;ENST00000415098;ENST00000409148;ENST00000417012;ENST00000416268	leucine rich repeat transmembrane neuronal 1 [Source:HGNC Symbol;Acc:HGNC:19408]	protein_coding;nonsense_mediated_decay	0.375119	-1.41458	3.23026e-06	down
ENSG00000240184	PCDHGC3	ENST00000308177;ENST00000611950;ENST00000622656;ENST00000622836;ENST00000616230;ENST00000617641;ENST00000617222;ENST00000621008	protocadherin gamma subfamily C, 3 [Source:HGNC Symbol;Acc:HGNC:8716]	protein_coding;processed_transcript	0.375437	-1.41336	0.0328591	down
ENSG00000128917	DLL4	ENST00000249749;ENST00000557876;ENST00000559440	delta like canonical Notch ligand 4 [Source:HGNC Symbol;Acc:HGNC:2910]	protein_coding;retained_intron	0.375573	-1.41283	0.00147665	down
ENSG00000138434	ITPRID2	ENST00000491720;ENST00000409001;ENST00000480753;ENST00000454579;ENST00000440623;ENST00000467172;ENST00000495248;ENST00000451836;ENST00000320370;ENST00000470654;ENST00000491866;ENST00000409136;ENST00000416081;ENST00000431877;ENST00000470129	ITPR interacting domain containing 2 [Source:HGNC Symbol;Acc:HGNC:11319]	retained_intron;protein_coding;nonsense_mediated_decay;processed_transcript	0.376067	-1.41094	7.65405e-17	down
ENSG00000198624	CCDC69	ENST00000519448;ENST00000355417;ENST00000518189;ENST00000519740;ENST00000522179;ENST00000524344;ENST00000521308;ENST00000522964	coiled-coil domain containing 69 [Source:HGNC Symbol;Acc:HGNC:24487]	retained_intron;protein_coding;nonsense_mediated_decay;processed_transcript	0.376269	-1.41016	0.00117862	down
ENSG00000163449	TMEM169	ENST00000406027;ENST00000437356;ENST00000295658;ENST00000454545;ENST00000455479;ENST00000433112	transmembrane protein 169 [Source:HGNC Symbol;Acc:HGNC:25130]	protein_coding	0.377472	-1.40556	5.25541e-06	down
ENSG00000173221	GLRX	ENST00000379979;ENST00000507412;ENST00000237858;ENST00000508780;ENST00000507605;ENST00000505427;ENST00000512469	glutaredoxin [Source:HGNC Symbol;Acc:HGNC:4330]	protein_coding;retained_intron;processed_transcript	0.377787	-1.40436	2.41593e-07	down
ENSG00000183145	RIPPLY3	ENST00000329553;ENST00000490393;ENST00000485272	ripply transcriptional repressor 3 [Source:HGNC Symbol;Acc:HGNC:3047]	protein_coding;processed_transcript	0.377836	-1.40417	0.0472939	down
ENSG00000174705	SH3PXD2B	ENST00000311601;ENST00000636523;ENST00000518522;ENST00000519643;ENST00000523651	SH3 and PX domains 2B [Source:HGNC Symbol;Acc:HGNC:29242]	protein_coding;processed_transcript	0.378226	-1.40268	0.00145804	down
ENSG00000147119	CHST7	ENST00000276055	carbohydrate sulfotransferase 7 [Source:HGNC Symbol;Acc:HGNC:13817]	protein_coding	0.379226	-1.39887	0.00123266	down
ENSG00000162873	KLHDC8A	ENST00000367155;ENST00000367156;ENST00000607826;ENST00000606111;ENST00000606181;ENST00000607173;ENST00000607193;ENST00000606887;ENST00000539253;ENST00000491471;ENST00000460687;ENST00000606529	kelch domain containing 8A [Source:HGNC Symbol;Acc:HGNC:25573]	protein_coding;processed_transcript	0.379704	-1.39705	6.47602e-10	down
ENSG00000145901	TNIP1	ENST00000522100;ENST00000610535;ENST00000523200;ENST00000523338;ENST00000389378;ENST00000315050;ENST00000518977;ENST00000520931;ENST00000521591;ENST00000524280;ENST00000519339;ENST00000522226;ENST00000521001;ENST00000521423;ENST00000522926;ENST00000522574;ENST00000521782;ENST00000610874;ENST00000517329;ENST00000517504;ENST00000520695	TNFAIP3 interacting protein 1 [Source:HGNC Symbol;Acc:HGNC:16903]	protein_coding;nonsense_mediated_decay;processed_transcript;retained_intron	0.379927	-1.39621	2.87914e-15	down
ENSG00000187796	CARD9	ENST00000481053;ENST00000641290;ENST00000556340;ENST00000489932;ENST00000371734;ENST00000485975;ENST00000371732;ENST00000460290	caspase recruitment domain family member 9 [Source:HGNC Symbol;Acc:HGNC:16391]	retained_intron;protein_coding;nonsense_mediated_decay	0.37998	-1.396	0.0487315	down
ENSG00000120088	CRHR1	ENST00000314537;ENST00000293493;ENST00000582766;ENST00000580876;ENST00000577353;ENST00000339069;ENST00000580955;ENST00000581479;ENST00000347197;ENST00000619154;ENST00000352855;ENST00000583888;ENST00000535778;ENST00000398285	corticotropin releasing hormone receptor 1 [Source:HGNC Symbol;Acc:HGNC:2357]	protein_coding;retained_intron;nonsense_mediated_decay	0.379981	-1.396	0.00243205	down
ENSG00000146276	GABRR1	ENST00000611484;ENST00000481493;ENST00000621627;ENST00000369451;ENST00000457434;ENST00000454853;ENST00000435811	gamma-aminobutyric acid type A receptor subunit rho1 [Source:HGNC Symbol;Acc:HGNC:4090]	protein_coding;processed_transcript;nonsense_mediated_decay	0.380234	-1.39504	0.0131916	down
ENSG00000137094	DNAJB5	ENST00000541010;ENST00000545841;ENST00000453597;ENST00000454002;ENST00000469798;ENST00000312316;ENST00000443266;ENST00000539059;ENST00000458263;ENST00000537321	DnaJ heat shock protein family (Hsp40) member B5 [Source:HGNC Symbol;Acc:HGNC:14887]	retained_intron;protein_coding;nonsense_mediated_decay	0.380526	-1.39393	0.0111154	down
ENSG00000198833	UBE2J1	ENST00000435041	ubiquitin conjugating enzyme E2 J1 [Source:HGNC Symbol;Acc:HGNC:17598]	protein_coding	0.38073	-1.39316	2.17378e-18	down
ENSG00000138308	PLA2G12B	ENST00000373032	phospholipase A2 group XIIB [Source:HGNC Symbol;Acc:HGNC:18555]	protein_coding	0.380879	-1.3926	0.00381112	down
ENSG00000168961	LGALS9	ENST00000486774;ENST00000584386;ENST00000481514;ENST00000313648;ENST00000302228;ENST00000577392;ENST00000579402;ENST00000580779;ENST00000584661;ENST00000467111;ENST00000578944;ENST00000395473;ENST00000583671;ENST00000448970;ENST00000579930;ENST00000581710	galectin 9 [Source:HGNC Symbol;Acc:HGNC:6570]	retained_intron;protein_coding;nonsense_mediated_decay;processed_transcript	0.380915	-1.39246	0.0189312	down
ENSG00000163565	IFI16	ENST00000368131;ENST00000474473;ENST00000483916;ENST00000426592;ENST00000359709;ENST00000368132;ENST00000562225;ENST00000567661;ENST00000447473;ENST00000493884;ENST00000566111;ENST00000340979;ENST00000448393;ENST00000295809	interferon gamma inducible protein 16 [Source:HGNC Symbol;Acc:HGNC:5395]	protein_coding;retained_intron	0.381745	-1.38932	0.000301922	down
ENSG00000184611	KCNH7	ENST00000621889;ENST00000332142;ENST00000328032;ENST00000618399;ENST00000477019	potassium voltage-gated channel subfamily H member 7 [Source:HGNC Symbol;Acc:HGNC:18863]	protein_coding;processed_transcript	0.381877	-1.38882	0.00037504	down
ENSG00000157542	KCNJ6	ENST00000609713;ENST00000645093	potassium inwardly rectifying channel subfamily J member 6 [Source:HGNC Symbol;Acc:HGNC:6267]	protein_coding	0.382575	-1.38619	0.00179776	down
ENSG00000128342	LIF	ENST00000249075;ENST00000403987	LIF interleukin 6 family cytokine [Source:HGNC Symbol;Acc:HGNC:6596]	protein_coding	0.382742	-1.38556	2.47478e-07	down
ENSG00000154839	SKA1	ENST00000285116;ENST00000398452;ENST00000494518;ENST00000417656;ENST00000488454	spindle and kinetochore associated complex subunit 1 [Source:HGNC Symbol;Acc:HGNC:28109]	protein_coding	0.382843	-1.38518	0.000210144	down
ENSG00000167513	CDT1	ENST00000562747;ENST00000301019;ENST00000569140	chromatin licensing and DNA replication factor 1 [Source:HGNC Symbol;Acc:HGNC:24576]	retained_intron;protein_coding	0.383354	-1.38325	2.14158e-08	down
ENSG00000115414	FN1	ENST00000438981;ENST00000492816;ENST00000356005;ENST00000426059;ENST00000456923;ENST00000494446;ENST00000323926;ENST00000496542;ENST00000446046;ENST00000336916;ENST00000443816;ENST00000480024;ENST00000357867;ENST00000359671;ENST00000432072;ENST00000354785;ENST00000498719;ENST00000421182;ENST00000474036;ENST00000490833;ENST00000485567;ENST00000460217;ENST00000473614;ENST00000480737;ENST00000461974…	fibronectin 1 [Source:HGNC Symbol;Acc:HGNC:3778]	protein_coding;retained_intron;processed_transcript	0.383543	-1.38254	4.84814e-16	down
ENSG00000180616	SSTR2	ENST00000357585;ENST00000579323	somatostatin receptor 2 [Source:HGNC Symbol;Acc:HGNC:11331]	protein_coding;processed_transcript	0.383859	-1.38135	4.67327e-08	down
ENSG00000172780	RAB43	ENST00000393304;ENST00000315150;ENST00000393305;ENST00000476465;ENST00000393307;ENST00000615093;ENST00000457077;ENST00000393308	RAB43, member RAS oncogene family [Source:HGNC Symbol;Acc:HGNC:19983]	protein_coding	0.384599	-1.37857	0.00244968	down
ENSG00000127564	PKMYT1	ENST00000575981;ENST00000262300;ENST00000573944;ENST00000382240;ENST00000571102;ENST00000572619;ENST00000572059;ENST00000575040;ENST00000572658;ENST00000574730;ENST00000431515;ENST00000574680;ENST00000572832;ENST00000440027;ENST00000570649;ENST00000574333;ENST00000575632;ENST00000574415;ENST00000576268;ENST00000574385	protein kinase, membrane associated tyrosine/threonine 1 [Source:HGNC Symbol;Acc:HGNC:29650]	retained_intron;protein_coding;nonsense_mediated_decay;processed_transcript	0.385065	-1.37683	1.90686e-06	down
ENSG00000159674	SPON2	ENST00000290902;ENST00000617421;ENST00000503765;ENST00000515004;ENST00000509233;ENST00000509697;ENST00000502657;ENST00000504871;ENST00000515553;ENST00000511672;ENST00000400762;ENST00000504909;ENST00000431380;ENST00000514490;ENST00000502483;ENST00000506266;ENST00000512150;ENST00000511679;ENST00000512888;ENST00000505653;ENST00000510542;ENST00000507466	spondin 2 [Source:HGNC Symbol;Acc:HGNC:11253]	protein_coding;retained_intron;processed_transcript	0.385147	-1.37652	0.000743746	down
ENSG00000162881	OXER1	ENST00000378661	oxoeicosanoid receptor 1 [Source:HGNC Symbol;Acc:HGNC:24884]	protein_coding	0.385216	-1.37626	0.013604	down
ENSG00000181467	RAP2B	ENST00000323534	RAP2B, member of RAS oncogene family [Source:HGNC Symbol;Acc:HGNC:9862]	protein_coding	0.386039	-1.37318	2.41143e-12	down
ENSG00000157445	CACNA2D3	ENST00000471363;ENST00000477024;ENST00000474759;ENST00000490478;ENST00000288197;ENST00000478466;ENST00000468658;ENST00000492460;ENST00000620722;ENST00000471865;ENST00000415676;ENST00000478261	calcium voltage-gated channel auxiliary subunit alpha2delta 3 [Source:HGNC Symbol;Acc:HGNC:15460]	nonsense_mediated_decay;protein_coding;processed_transcript;retained_intron	0.386622	-1.37101	3.98279e-06	down
ENSG00000066735	KIF26A	ENST00000315264;ENST00000423312	kinesin family member 26A [Source:HGNC Symbol;Acc:HGNC:20226]	protein_coding	0.386708	-1.37068	4.22989e-07	down
ENSG00000269405	NXF2	ENST00000625106;ENST00000604790	nuclear RNA export factor 2 [Source:HGNC Symbol;Acc:HGNC:8072]	protein_coding	0.387286	-1.36853	0.0328404	down
ENSG00000127588	GNG13	ENST00000248150	G protein subunit gamma 13 [Source:HGNC Symbol;Acc:HGNC:14131]	protein_coding	0.388279	-1.36483	0.0295453	down
ENSG00000172209	GPR22	ENST00000304402;ENST00000496754;ENST00000473300	G protein-coupled receptor 22 [Source:HGNC Symbol;Acc:HGNC:4477]	protein_coding;retained_intron;processed_transcript	0.388383	-1.36445	0.00025326	down
ENSG00000275183	LENG9	ENST00000611161	leukocyte receptor cluster member 9 [Source:HGNC Symbol;Acc:HGNC:16306]	protein_coding	0.388395	-1.3644	0.0184434	down
ENSG00000149596	JPH2	ENST00000372980;ENST00000342272	junctophilin 2 [Source:HGNC Symbol;Acc:HGNC:14202]	protein_coding	0.388427	-1.36429	2.23344e-08	down
ENSG00000160808	MYL3	ENST00000395869;ENST00000292327;ENST00000654597;ENST00000662933;ENST00000655244;ENST00000653454;ENST00000664891;ENST00000431168	myosin light chain 3 [Source:HGNC Symbol;Acc:HGNC:7584]	protein_coding;processed_transcript	0.388523	-1.36393	0.00247008	down
ENSG00000129173	E2F8	ENST00000527884;ENST00000250024;ENST00000529188;ENST00000532666;ENST00000620009	E2F transcription factor 8 [Source:HGNC Symbol;Acc:HGNC:24727]	protein_coding;processed_transcript	0.3894	-1.36067	6.58827e-05	down
ENSG00000130164	LDLR	ENST00000558013;ENST00000558518;ENST00000560467;ENST00000560502;ENST00000252444;ENST00000545707;ENST00000560628;ENST00000559340;ENST00000558528;ENST00000535915;ENST00000557958;ENST00000455727;ENST00000557933;ENST00000560173	low density lipoprotein receptor [Source:HGNC Symbol;Acc:HGNC:6547]	protein_coding;retained_intron;processed_transcript;nonsense_mediated_decay	0.389443	-1.36052	0.00074532	down
ENSG00000204060	FOXO6	ENST00000372591;ENST00000641094	forkhead box O6 [Source:HGNC Symbol;Acc:HGNC:24814]	processed_transcript;protein_coding	0.389538	-1.36016	0.00121046	down
ENSG00000150630	VEGFC	ENST00000618562;ENST00000507638	vascular endothelial growth factor C [Source:HGNC Symbol;Acc:HGNC:12682]	protein_coding;processed_transcript	0.389598	-1.35994	0.0259416	down
ENSG00000185760	KCNQ5	ENST00000629977;ENST00000342056;ENST00000370398;ENST00000370392;ENST00000628967;ENST00000445310;ENST00000414165;ENST00000427928;ENST00000403813;ENST00000355194;ENST00000402622;ENST00000441538;ENST00000355635;ENST00000443915	potassium voltage-gated channel subfamily Q member 5 [Source:HGNC Symbol;Acc:HGNC:6299]	protein_coding;processed_transcript	0.389926	-1.35873	0.000492792	down
ENSG00000123374	CDK2	ENST00000554619;ENST00000266970;ENST00000556656;ENST00000555408;ENST00000556146;ENST00000554545;ENST00000440311;ENST00000556276;ENST00000553376;ENST00000555357;ENST00000354056;ENST00000556464	cyclin dependent kinase 2 [Source:HGNC Symbol;Acc:HGNC:1771]	retained_intron;protein_coding;processed_transcript;nonsense_mediated_decay	0.389945	-1.35866	4.71231e-10	down
ENSG00000171617	ENC1	ENST00000651128;ENST00000618628;ENST00000302351;ENST00000537006;ENST00000510316;ENST00000509127;ENST00000509284;ENST00000508331	ectodermal-neural cortex 1 [Source:HGNC Symbol;Acc:HGNC:3345]	protein_coding;processed_transcript	0.390016	-1.3584	9.22089e-14	down
ENSG00000164292	RHOBTB3	ENST00000504949;ENST00000379982;ENST00000514198;ENST00000510623;ENST00000507186;ENST00000511558;ENST00000510313;ENST00000504179;ENST00000512878;ENST00000502541;ENST00000503737;ENST00000510226;ENST00000513091;ENST00000506817;ENST00000506959;ENST00000515852	Rho related BTB domain containing 3 [Source:HGNC Symbol;Acc:HGNC:18757]	retained_intron;protein_coding;nonsense_mediated_decay;processed_transcript	0.390146	-1.35791	2.71845e-12	down
ENSG00000275342	PRAG1	ENST00000622241;ENST00000615670	PEAK1 related, kinase-activating pseudokinase 1 [Source:HGNC Symbol;Acc:HGNC:25438]	protein_coding	0.390154	-1.35789	9.88016e-15	down
ENSG00000119681	LTBP2	ENST00000261978;ENST00000556206;ENST00000556690;ENST00000557425;ENST00000554861;ENST00000553939	latent transforming growth factor beta binding protein 2 [Source:HGNC Symbol;Acc:HGNC:6715]	protein_coding;processed_transcript;retained_intron;nonsense_mediated_decay	0.391171	-1.35413	1.4229e-05	down
ENSG00000069974	RAB27A	ENST00000396307;ENST00000336787;ENST00000563262;ENST00000568803;ENST00000566877;ENST00000567639;ENST00000567380;ENST00000564609;ENST00000561545;ENST00000565776;ENST00000569493;ENST00000565972	RAB27A, member RAS oncogene family [Source:HGNC Symbol;Acc:HGNC:9766]	protein_coding;retained_intron;processed_transcript	0.391444	-1.35312	1.32372e-05	down
ENSG00000168004	PLAAT5	ENST00000540857;ENST00000394615;ENST00000539221;ENST00000536887;ENST00000538712;ENST00000301790	phospholipase A and acyltransferase 5 [Source:HGNC Symbol;Acc:HGNC:24978]	protein_coding;nonsense_mediated_decay	0.391533	-1.35279	0.000607426	down
ENSG00000128683	GAD1	ENST00000488724;ENST00000478562;ENST00000358196;ENST00000625689;ENST00000445006;ENST00000486850;ENST00000375272;ENST00000493875;ENST00000344257;ENST00000493270;ENST00000455008;ENST00000429023;ENST00000485013;ENST00000456864;ENST00000414527;ENST00000462739;ENST00000454603	glutamate decarboxylase 1 [Source:HGNC Symbol;Acc:HGNC:4092]	retained_intron;protein_coding;nonsense_mediated_decay;processed_transcript	0.391656	-1.35234	0.00236906	down
ENSG00000107338	SHB	ENST00000377707	SH2 domain containing adaptor protein B [Source:HGNC Symbol;Acc:HGNC:10838]	protein_coding	0.392597	-1.34888	3.42473e-10	down
ENSG00000168152	THAP9	ENST00000302236;ENST00000505901;ENST00000506208;ENST00000514244;ENST00000514440;ENST00000509353	THAP domain containing 9 [Source:HGNC Symbol;Acc:HGNC:23192]	protein_coding;nonsense_mediated_decay	0.392718	-1.34843	0.0198485	down
ENSG00000185156	MFSD6L	ENST00000329805	major facilitator superfamily domain containing 6 like [Source:HGNC Symbol;Acc:HGNC:26656]	protein_coding	0.392821	-1.34806	0.0165881	down
ENSG00000166833	NAV2	ENST00000360655;ENST00000527559;ENST00000533917;ENST00000525322;ENST00000349880;ENST00000525025;ENST00000396087;ENST00000650578;ENST00000528923;ENST00000530408;ENST00000528008;ENST00000533746;ENST00000540292;ENST00000534229;ENST00000534299;ENST00000396085;ENST00000526675	neuron navigator 2 [Source:HGNC Symbol;Acc:HGNC:15997]	protein_coding;retained_intron;processed_transcript	0.392928	-1.34766	4.40246e-14	down
ENSG00000135269	TES	ENST00000358204;ENST00000455989;ENST00000461440;ENST00000492891;ENST00000496871;ENST00000463746;ENST00000393481;ENST00000393484;ENST00000496912;ENST00000485009;ENST00000494384	testin LIM domain protein [Source:HGNC Symbol;Acc:HGNC:14620]	protein_coding;retained_intron;nonsense_mediated_decay;processed_transcript	0.393596	-1.34521	2.9691e-11	down
ENSG00000035499	DEPDC1B	ENST00000265036;ENST00000453022;ENST00000512452;ENST00000512078;ENST00000505017;ENST00000509006	DEP domain containing 1B [Source:HGNC Symbol;Acc:HGNC:24902]	protein_coding;nonsense_mediated_decay;retained_intron;processed_transcript	0.393698	-1.34484	2.89791e-08	down
ENSG00000131773	KHDRBS3	ENST00000355849;ENST00000521461;ENST00000517859;ENST00000517394;ENST00000524282;ENST00000522578;ENST00000522079;ENST00000519600;ENST00000520981;ENST00000524199;ENST00000518728;ENST00000522433	KH RNA binding domain containing, signal transduction associated 3 [Source:HGNC Symbol;Acc:HGNC:18117]	protein_coding;nonsense_mediated_decay;processed_transcript;retained_intron	0.394419	-1.3422	1.92056e-10	down
ENSG00000105499	PLA2G4C	ENST00000354276;ENST00000597713;ENST00000594790;ENST00000596353;ENST00000595899;ENST00000599063;ENST00000599921;ENST00000594156;ENST00000599300;ENST00000599239;ENST00000601946;ENST00000598457;ENST00000595487;ENST00000598185;ENST00000593765;ENST00000596510;ENST00000597377;ENST00000596138;ENST00000596352;ENST00000600170;ENST00000595161;ENST00000598488;ENST00000599111;ENST00000598813	phospholipase A2 group IVC [Source:HGNC Symbol;Acc:HGNC:9037]	protein_coding;nonsense_mediated_decay;retained_intron;processed_transcript	0.394471	-1.34201	0.00155391	down
ENSG00000108839	ALOX12	ENST00000251535;ENST00000406228;ENST00000480801	arachidonate 12-lipoxygenase, 12S type [Source:HGNC Symbol;Acc:HGNC:429]	protein_coding;retained_intron	0.394815	-1.34075	0.0371862	down
ENSG00000174804	FZD4	ENST00000531380	frizzled class receptor 4 [Source:HGNC Symbol;Acc:HGNC:4042]	protein_coding	0.395209	-1.33931	2.39842e-06	down
ENSG00000186854	TRABD2A	ENST00000409133;ENST00000495990;ENST00000496500;ENST00000489999;ENST00000479944;ENST00000460991;ENST00000409520;ENST00000436322;ENST00000335459;ENST00000474298	TraB domain containing 2A [Source:HGNC Symbol;Acc:HGNC:27013]	protein_coding;retained_intron;processed_transcript	0.395397	-1.33863	0.0372164	down
ENSG00000104888	SLC17A7	ENST00000221485;ENST00000598018;ENST00000600672;ENST00000596689;ENST00000600601	solute carrier family 17 member 7 [Source:HGNC Symbol;Acc:HGNC:16704]	protein_coding;retained_intron;nonsense_mediated_decay	0.395573	-1.33798	0.00244386	down
ENSG00000020181	ADGRA2	ENST00000412232;ENST00000428068;ENST00000315215	adhesion G protein-coupled receptor A2 [Source:HGNC Symbol;Acc:HGNC:17849]	protein_coding	0.395771	-1.33726	0.00296957	down
ENSG00000102221	JADE3	ENST00000611250;ENST00000614628;ENST00000424392;ENST00000455411	jade family PHD finger 3 [Source:HGNC Symbol;Acc:HGNC:22982]	protein_coding	0.395906	-1.33677	2.13967e-12	down
ENSG00000006016	CRLF1	ENST00000392386;ENST00000594325;ENST00000597131;ENST00000593286;ENST00000596360	cytokine receptor like factor 1 [Source:HGNC Symbol;Acc:HGNC:2364]	protein_coding;processed_transcript;retained_intron	0.396226	-1.33561	0.015542	down
ENSG00000113580	NR3C1	ENST00000343796;ENST00000510170;ENST00000394464;ENST00000508760;ENST00000231509;ENST00000424646;ENST00000504336;ENST00000503701;ENST00000394466;ENST00000503201;ENST00000652686;ENST00000514699;ENST00000502500;ENST00000505058;ENST00000502892;ENST00000504572;ENST00000415690	nuclear receptor subfamily 3 group C member 1 [Source:HGNC Symbol;Acc:HGNC:7978]	protein_coding;processed_transcript	0.396704	-1.33386	0.000873757	down
ENSG00000164683	HEY1	ENST00000354724;ENST00000674439;ENST00000674418;ENST00000519075;ENST00000674358;ENST00000435063;ENST00000674295;ENST00000674177;ENST00000518733;ENST00000521111;ENST00000523976;ENST00000523531;ENST00000674192;ENST00000337919;ENST00000674160	hes related family bHLH transcription factor with YRPW motif 1 [Source:HGNC Symbol;Acc:HGNC:4880]	protein_coding;retained_intron;processed_transcript;nonsense_mediated_decay	0.398123	-1.32871	0.000222513	down
ENSG00000118946	PCDH17	ENST00000377918;ENST00000484979;ENST00000615375;ENST00000612954	protocadherin 17 [Source:HGNC Symbol;Acc:HGNC:14267]	protein_coding;nonsense_mediated_decay	0.39856	-1.32713	1.87128e-07	down
ENSG00000100504	PYGL	ENST00000216392;ENST00000530336;ENST00000544180;ENST00000532462;ENST00000553872;ENST00000528757;ENST00000532107	glycogen phosphorylase L [Source:HGNC Symbol;Acc:HGNC:9725]	protein_coding;retained_intron	0.398691	-1.32666	1.65648e-13	down
ENSG00000185838	GNB1L	ENST00000329517;ENST00000403325;ENST00000453108;ENST00000460402;ENST00000481086;ENST00000405009	G protein subunit beta 1 like [Source:HGNC Symbol;Acc:HGNC:4397]	protein_coding;processed_transcript	0.399297	-1.32447	0.000811335	down
ENSG00000186212	SOWAHB	ENST00000334306	sosondowah ankyrin repeat domain family member B [Source:HGNC Symbol;Acc:HGNC:32958]	protein_coding	0.399919	-1.32222	0.00278028	down
ENSG00000184194	GPR173	ENST00000332582;ENST00000375466	G protein-coupled receptor 173 [Source:HGNC Symbol;Acc:HGNC:18186]	protein_coding	0.40027	-1.32096	1.88425e-10	down
ENSG00000155011	DKK2	ENST00000285311;ENST00000513208;ENST00000510534;ENST00000510463	dickkopf WNT signaling pathway inhibitor 2 [Source:HGNC Symbol;Acc:HGNC:2892]	protein_coding;retained_intron	0.400512	-1.32008	0.00690899	down
ENSG00000151376	ME3	ENST00000524826;ENST00000543262;ENST00000526504;ENST00000530520;ENST00000323418;ENST00000393324;ENST00000530335;ENST00000532471;ENST00000526834;ENST00000526944;ENST00000534638;ENST00000525957	malic enzyme 3 [Source:HGNC Symbol;Acc:HGNC:6985]	protein_coding;nonsense_mediated_decay;retained_intron;processed_transcript	0.400565	-1.31989	3.56592e-09	down
ENSG00000119314	PTBP3	ENST00000374257;ENST00000374255;ENST00000343327;ENST00000334318;ENST00000487997;ENST00000458258;ENST00000210227;ENST00000450374	polypyrimidine tract binding protein 3 [Source:HGNC Symbol;Acc:HGNC:10253]	protein_coding;processed_transcript	0.401045	-1.31816	4.93843e-15	down
ENSG00000176399	DMRTA1	ENST00000325870	DMRT like family A1 [Source:HGNC Symbol;Acc:HGNC:13826]	protein_coding	0.401293	-1.31727	7.59673e-05	down
ENSG00000158710	TAGLN2	ENST00000368097;ENST00000320307;ENST00000478033;ENST00000397334;ENST00000368096	transgelin 2 [Source:HGNC Symbol;Acc:HGNC:11554]	protein_coding;processed_transcript	0.401297	-1.31726	2.8808e-13	down
ENSG00000101445	PPP1R16B	ENST00000299824;ENST00000463749;ENST00000373331;ENST00000468265	protein phosphatase 1 regulatory subunit 16B [Source:HGNC Symbol;Acc:HGNC:15850]	protein_coding;processed_transcript	0.401386	-1.31694	0.00380541	down
ENSG00000144118	RALB	ENST00000272519;ENST00000470417;ENST00000420510;ENST00000412383;ENST00000449649;ENST00000631312;ENST00000447591;ENST00000431732	RAS like proto-oncogene B [Source:HGNC Symbol;Acc:HGNC:9840]	protein_coding;processed_transcript;nonsense_mediated_decay	0.402204	-1.314	0.00791263	down
ENSG00000214717	ZBED1	ENST00000381222;ENST00000381218;ENST00000652001;ENST00000461691;ENST00000515319;ENST00000381223	zinc finger BED-type containing 1 [Source:HGNC Symbol;Acc:HGNC:447]	protein_coding;processed_transcript	0.402703	-1.31221	0.00241009	down
ENSG00000113594	LIFR	ENST00000453190;ENST00000508477;ENST00000503088;ENST00000506990;ENST00000511561;ENST00000512723;ENST00000506003;ENST00000263409;ENST00000507786	LIF receptor subunit alpha [Source:HGNC Symbol;Acc:HGNC:6597]	protein_coding;retained_intron;processed_transcript;nonsense_mediated_decay	0.402704	-1.31221	4.06601e-10	down
ENSG00000196782	MAML3	ENST00000509479;ENST00000398940;ENST00000502696	mastermind like transcriptional coactivator 3 [Source:HGNC Symbol;Acc:HGNC:16272]	protein_coding	0.40275	-1.31204	8.51666e-10	down
ENSG00000159167	STC1	ENST00000290271;ENST00000524323	stanniocalcin 1 [Source:HGNC Symbol;Acc:HGNC:11373]	protein_coding	0.403548	-1.30919	2.07618e-06	down
ENSG00000144119	C1QL2	ENST00000272520	complement C1q like 2 [Source:HGNC Symbol;Acc:HGNC:24181]	protein_coding	0.403824	-1.3082	0.00933098	down
ENSG00000184486	POU3F2	ENST00000328345	POU class 3 homeobox 2 [Source:HGNC Symbol;Acc:HGNC:9215]	protein_coding	0.404014	-1.30752	1.26668e-09	down
ENSG00000171551	ECEL1	ENST00000411860;ENST00000482346;ENST00000304546;ENST00000409941	endothelin converting enzyme like 1 [Source:HGNC Symbol;Acc:HGNC:3147]	protein_coding;retained_intron	0.404447	-1.30598	4.02534e-07	down
ENSG00000164040	PGRMC2	ENST00000296425;ENST00000613358;ENST00000520121;ENST00000394276;ENST00000503872;ENST00000512483;ENST00000503588;ENST00000509070	progesterone receptor membrane component 2 [Source:HGNC Symbol;Acc:HGNC:16089]	protein_coding;nonsense_mediated_decay	0.404799	-1.30472	0.00135848	down
ENSG00000088826	SMOX	ENST00000305958;ENST00000621355;ENST00000346595;ENST00000278795;ENST00000486998;ENST00000379460;ENST00000494098;ENST00000457205;ENST00000339123;ENST00000493223;ENST00000466004;ENST00000484515	spermine oxidase [Source:HGNC Symbol;Acc:HGNC:15862]	protein_coding;processed_transcript	0.404958	-1.30416	2.92635e-07	down
ENSG00000139289	PHLDA1	ENST00000602540;ENST00000266671;ENST00000619060	pleckstrin homology like domain family A member 1 [Source:HGNC Symbol;Acc:HGNC:8933]	protein_coding	0.405136	-1.30352	2.57544e-11	down
ENSG00000174136	RGMB	ENST00000513185;ENST00000434027;ENST00000308234;ENST00000505265;ENST00000508978;ENST00000504776;ENST00000507054	repulsive guidance molecule BMP co-receptor b [Source:HGNC Symbol;Acc:HGNC:26896]	protein_coding;retained_intron;processed_transcript	0.405283	-1.303	1.91673e-12	down
ENSG00000121310	ECHDC2	ENST00000460612;ENST00000498544;ENST00000371520;ENST00000486170;ENST00000495920;ENST00000467988;ENST00000487851;ENST00000544365;ENST00000488268;ENST00000544531;ENST00000487866;ENST00000479183;ENST00000371522;ENST00000480312;ENST00000358358;ENST00000543419;ENST00000474789;ENST00000476477;ENST00000539680;ENST00000492992;ENST00000487040;ENST00000463923;ENST00000479593;ENST00000536120;ENST00000493896…	enoyl-CoA hydratase domain containing 2 [Source:HGNC Symbol;Acc:HGNC:23408]	retained_intron;nonsense_mediated_decay;processed_transcript;protein_coding	0.405671	-1.30162	0.000735183	down
ENSG00000185070	FLRT2	ENST00000330753;ENST00000556335;ENST00000553627;ENST00000555398;ENST00000554746;ENST00000553650;ENST00000557419	fibronectin leucine rich transmembrane protein 2 [Source:HGNC Symbol;Acc:HGNC:3761]	protein_coding;processed_transcript;retained_intron	0.405684	-1.30157	4.88169e-07	down
ENSG00000213214	ARHGEF35	ENST00000378115	Rho guanine nucleotide exchange factor 35 [Source:HGNC Symbol;Acc:HGNC:33846]	protein_coding	0.405686	-1.30156	0.000336037	down
ENSG00000185432	METTL7A	ENST00000332160;ENST00000550502;ENST00000550097;ENST00000548553;ENST00000547104	methyltransferase like 7A [Source:HGNC Symbol;Acc:HGNC:24550]	protein_coding;nonsense_mediated_decay	0.405722	-1.30144	0.0168197	down
ENSG00000033122	LRRC7	ENST00000651989;ENST00000310961;ENST00000588515;ENST00000370958;ENST00000608815;ENST00000607936;ENST00000415775;ENST00000609072;ENST00000565615;ENST00000608744;ENST00000608470;ENST00000441830;ENST00000609498;ENST00000651217	leucine rich repeat containing 7 [Source:HGNC Symbol;Acc:HGNC:18531]	protein_coding;nonsense_mediated_decay;retained_intron;processed_transcript	0.405743	-1.30136	0.00656481	down
ENSG00000155816	FMN2	ENST00000319653;ENST00000543681;ENST00000545751;ENST00000463398;ENST00000441342;ENST00000447095;ENST00000496950	formin 2 [Source:HGNC Symbol;Acc:HGNC:14074]	protein_coding;processed_transcript	0.405967	-1.30057	7.36935e-08	down
ENSG00000163513	TGFBR2	ENST00000295754;ENST00000673203;ENST00000359013;ENST00000672050;ENST00000673250;ENST00000672866	transforming growth factor beta receptor 2 [Source:HGNC Symbol;Acc:HGNC:11773]	protein_coding;retained_intron;processed_transcript	0.406565	-1.29844	1.68312e-06	down
ENSG00000109991	P2RX3	ENST00000263314;ENST00000616487;ENST00000533436;ENST00000534820	purinergic receptor P2X 3 [Source:HGNC Symbol;Acc:HGNC:8534]	protein_coding;processed_transcript;nonsense_mediated_decay	0.406891	-1.29728	1.12544e-09	down
ENSG00000019549	SNAI2	ENST00000020945;ENST00000649776;ENST00000396822	snail family transcriptional repressor 2 [Source:HGNC Symbol;Acc:HGNC:11094]	protein_coding;retained_intron	0.406979	-1.29698	2.89749e-07	down
ENSG00000137474	MYO7A	ENST00000409709;ENST00000481532;ENST00000467137;ENST00000409893;ENST00000620575;ENST00000458169;ENST00000458637;ENST00000670577;ENST00000409619;ENST00000669443;ENST00000481328;ENST00000605744;ENST00000526863;ENST00000660626	myosin VIIA [Source:HGNC Symbol;Acc:HGNC:7606]	protein_coding;retained_intron;nonsense_mediated_decay;processed_transcript	0.407221	-1.29612	0.000108973	down
ENSG00000139679	LPAR6	ENST00000378434;ENST00000470937;ENST00000620633;ENST00000462781;ENST00000482024;ENST00000465365;ENST00000481832;ENST00000345941;ENST00000464486	lysophosphatidic acid receptor 6 [Source:HGNC Symbol;Acc:HGNC:15520]	protein_coding;processed_transcript	0.408032	-1.29325	0.03719	down
ENSG00000115194	SLC30A3	ENST00000482990;ENST00000497341;ENST00000424577;ENST00000233535;ENST00000445870;ENST00000486309;ENST00000450118;ENST00000432351;ENST00000426569;ENST00000426924	solute carrier family 30 member 3 [Source:HGNC Symbol;Acc:HGNC:11014]	retained_intron;protein_coding	0.409073	-1.28957	0.0152421	down
ENSG00000152954	NRSN1	ENST00000378478;ENST00000475830;ENST00000378491;ENST00000463207;ENST00000468195;ENST00000378477;ENST00000378475	neurensin 1 [Source:HGNC Symbol;Acc:HGNC:17881]	protein_coding;processed_transcript	0.409285	-1.28882	0.0129105	down
ENSG00000154783	FGD5	ENST00000285046;ENST00000543601;ENST00000476851;ENST00000640506;ENST00000487605;ENST00000457774;ENST00000468662	FYVE, RhoGEF and PH domain containing 5 [Source:HGNC Symbol;Acc:HGNC:19117]	protein_coding;processed_transcript;retained_intron	0.409309	-1.28874	3.03647e-05	down
ENSG00000124164	VAPB	ENST00000475243;ENST00000395802;ENST00000476395;ENST00000265619;ENST00000520497;ENST00000463370	VAMP associated protein B and C [Source:HGNC Symbol;Acc:HGNC:12649]	protein_coding;retained_intron;processed_transcript;nonsense_mediated_decay	0.409502	-1.28806	6.02393e-09	down
ENSG00000159314	ARHGAP27	ENST00000532891;ENST00000428638;ENST00000376922;ENST00000531735;ENST00000582826;ENST00000524404;ENST00000526484;ENST00000532038;ENST00000528273;ENST00000581991;ENST00000528677;ENST00000290470;ENST00000581638;ENST00000529357;ENST00000579357;ENST00000590026;ENST00000527678;ENST00000528384;ENST00000532667	Rho GTPase activating protein 27 [Source:HGNC Symbol;Acc:HGNC:31813]	protein_coding;retained_intron;processed_transcript;nonsense_mediated_decay	0.409879	-1.28673	6.56577e-06	down
ENSG00000106868	SUSD1	ENST00000374270;ENST00000355396;ENST00000374263;ENST00000482851;ENST00000475283;ENST00000415074;ENST00000529933;ENST00000528773;ENST00000374264;ENST00000532348	sushi domain containing 1 [Source:HGNC Symbol;Acc:HGNC:25413]	protein_coding;processed_transcript;nonsense_mediated_decay;retained_intron	0.410088	-1.28599	1.11759e-07	down
ENSG00000188643	S100A16	ENST00000368706;ENST00000474991;ENST00000368705;ENST00000368704;ENST00000368703	S100 calcium binding protein A16 [Source:HGNC Symbol;Acc:HGNC:20441]	protein_coding;processed_transcript	0.410169	-1.28571	1.53772e-12	down
ENSG00000136830	NIBAN2	ENST00000373312;ENST00000468379;ENST00000373314;ENST00000478917;ENST00000465154;ENST00000484348;ENST00000476091	niban apoptosis regulator 2 [Source:HGNC Symbol;Acc:HGNC:25282]	protein_coding;processed_transcript	0.410398	-1.2849	1.91598e-14	down
ENSG00000174307	PHLDA3	ENST00000367311;ENST00000485436;ENST00000367309;ENST00000497057	pleckstrin homology like domain family A member 3 [Source:HGNC Symbol;Acc:HGNC:8934]	protein_coding;processed_transcript	0.410671	-1.28395	8.09015e-10	down
ENSG00000126391	FRMD8	ENST00000317568;ENST00000416776;ENST00000531151;ENST00000528854;ENST00000355991;ENST00000526201;ENST00000533782;ENST00000525156;ENST00000531296	FERM domain containing 8 [Source:HGNC Symbol;Acc:HGNC:25462]	protein_coding;retained_intron	0.410839	-1.28336	0.000595966	down
ENSG00000276600	RAB7B	ENST00000617991;ENST00000622969;ENST00000623893;ENST00000617070;ENST00000623597	RAB7B, member RAS oncogene family [Source:HGNC Symbol;Acc:HGNC:30513]	protein_coding;nonsense_mediated_decay	0.411953	-1.27945	0.0470998	down
ENSG00000143367	TUFT1	ENST00000368849;ENST00000498606;ENST00000368848;ENST00000490156;ENST00000461859;ENST00000392712;ENST00000353024	tuftelin 1 [Source:HGNC Symbol;Acc:HGNC:12422]	protein_coding;retained_intron	0.412167	-1.2787	1.26383e-12	down
ENSG00000188641	DPYD	ENST00000370192;ENST00000646851;ENST00000474241;ENST00000460019;ENST00000306031	dihydropyrimidine dehydrogenase [Source:HGNC Symbol;Acc:HGNC:3012]	protein_coding;processed_transcript;retained_intron	0.412195	-1.2786	0.0367455	down
ENSG00000196247	ZNF107	ENST00000344930;ENST00000395391;ENST00000423627;ENST00000620827;ENST00000613690;ENST00000360117	zinc finger protein 107 [Source:HGNC Symbol;Acc:HGNC:12887]	protein_coding	0.412221	-1.27851	6.27424e-07	down
ENSG00000167608	TMC4	ENST00000617472;ENST00000613723;ENST00000495398;ENST00000611183;ENST00000613492;ENST00000497518;ENST00000476013;ENST00000446291;ENST00000619895;ENST00000615945	transmembrane channel like 4 [Source:HGNC Symbol;Acc:HGNC:22998]	protein_coding;retained_intron;processed_transcript;nonsense_mediated_decay	0.412627	-1.27709	0.00904479	down
ENSG00000101542	CDH20	ENST00000262717;ENST00000536675;ENST00000538374;ENST00000587582	cadherin 20 [Source:HGNC Symbol;Acc:HGNC:1760]	protein_coding;retained_intron	0.412698	-1.27684	3.06302e-05	down
ENSG00000159251	ACTC1	ENST00000560563;ENST00000290378;ENST00000650163;ENST00000648556;ENST00000557860;ENST00000647798	actin alpha cardiac muscle 1 [Source:HGNC Symbol;Acc:HGNC:143]	retained_intron;protein_coding;processed_transcript	0.413137	-1.27531	7.72581e-10	down
ENSG00000188505	NCCRP1	ENST00000339852	NCCRP1, F-box associated domain containing [Source:HGNC Symbol;Acc:HGNC:33739]	protein_coding	0.413401	-1.27439	0.0399881	down
ENSG00000146232	NFKBIE	ENST00000275015;ENST00000619360;ENST00000477930;ENST00000443607	NFKB inhibitor epsilon [Source:HGNC Symbol;Acc:HGNC:7799]	protein_coding;nonsense_mediated_decay	0.413469	-1.27415	5.25082e-08	down
ENSG00000085831	TTC39A	ENST00000262675;ENST00000413473;ENST00000447632;ENST00000439482;ENST00000401051;ENST00000422925;ENST00000431927;ENST00000380849;ENST00000527205;ENST00000525906;ENST00000262676;ENST00000534098;ENST00000411642;ENST00000524442;ENST00000371750;ENST00000371747;ENST00000530004;ENST00000532836	tetratricopeptide repeat domain 39A [Source:HGNC Symbol;Acc:HGNC:18657]	protein_coding;processed_transcript	0.41347	-1.27415	0.000160337	down
ENSG00000162981	LRATD1	ENST00000331243;ENST00000295092;ENST00000497769;ENST00000464947	LRAT domain containing 1 [Source:HGNC Symbol;Acc:HGNC:20743]	protein_coding;processed_transcript	0.414198	-1.27161	1.29862e-05	down
ENSG00000123104	ITPR2	ENST00000381340;ENST00000540791;ENST00000543958;ENST00000545902;ENST00000536627;ENST00000538984;ENST00000545235;ENST00000540429;ENST00000451599;ENST00000242737	inositol 1,4,5-trisphosphate receptor type 2 [Source:HGNC Symbol;Acc:HGNC:6181]	protein_coding;processed_transcript;retained_intron;nonsense_mediated_decay	0.414466	-1.27068	7.84533e-06	down
ENSG00000147526	TACC1	ENST00000317827;ENST00000276520;ENST00000519093;ENST00000521154;ENST00000524193;ENST00000522474;ENST00000520615;ENST00000518415;ENST00000523834;ENST00000524354;ENST00000522544;ENST00000519416;ENST00000522904;ENST00000522955;ENST00000520340;ENST00000522983;ENST00000521642;ENST00000520611;ENST00000521866;ENST00000523239;ENST00000517336;ENST00000521568;ENST00000521050;ENST00000520973;ENST00000522548…	transforming acidic coiled-coil containing protein 1 [Source:HGNC Symbol;Acc:HGNC:11522]	protein_coding;retained_intron;processed_transcript	0.414574	-1.2703	1.43313e-05	down
ENSG00000140015	KCNH5	ENST00000322893;ENST00000394964;ENST00000394968;ENST00000420622	potassium voltage-gated channel subfamily H member 5 [Source:HGNC Symbol;Acc:HGNC:6254]	protein_coding;retained_intron	0.415306	-1.26775	0.0141279	down
ENSG00000140968	IRF8	ENST00000562492;ENST00000564056;ENST00000570088;ENST00000563180;ENST00000565552;ENST00000564803;ENST00000564617;ENST00000268638;ENST00000569607;ENST00000569145;ENST00000566369	interferon regulatory factor 8 [Source:HGNC Symbol;Acc:HGNC:5358]	protein_coding;retained_intron	0.415589	-1.26677	0.0402843	down
ENSG00000196526	AFAP1	ENST00000360265;ENST00000420658;ENST00000358461;ENST00000505447;ENST00000382543;ENST00000513856;ENST00000508415;ENST00000614385;ENST00000513842;ENST00000612691	actin filament associated protein 1 [Source:HGNC Symbol;Acc:HGNC:24017]	protein_coding;retained_intron;processed_transcript	0.415841	-1.2659	2.31756e-13	down
ENSG00000198039	ZNF273	ENST00000476120;ENST00000489672;ENST00000395375;ENST00000471926;ENST00000527278;ENST00000476730;ENST00000465954	zinc finger protein 273 [Source:HGNC Symbol;Acc:HGNC:13067]	protein_coding;processed_transcript;nonsense_mediated_decay	0.416088	-1.26504	0.00165813	down
ENSG00000151789	ZNF385D	ENST00000281523;ENST00000469927;ENST00000474607;ENST00000495739;ENST00000466511;ENST00000446749;ENST00000478967;ENST00000494108;ENST00000494118;ENST00000467140;ENST00000497570	zinc finger protein 385D [Source:HGNC Symbol;Acc:HGNC:26191]	protein_coding;processed_transcript;nonsense_mediated_decay	0.416493	-1.26364	0.000355459	down
ENSG00000118785	SPP1	ENST00000395080;ENST00000360804;ENST00000237623;ENST00000508002;ENST00000513981;ENST00000509659;ENST00000509334;ENST00000614857;ENST00000504310;ENST00000508233;ENST00000505146	secreted phosphoprotein 1 [Source:HGNC Symbol;Acc:HGNC:11255]	protein_coding;retained_intron;processed_transcript	0.416743	-1.26277	3.05672e-06	down
ENSG00000160111	CPAMD8	ENST00000651564;ENST00000594249;ENST00000443236;ENST00000596572;ENST00000595323;ENST00000600235;ENST00000597335;ENST00000291440;ENST00000601782;ENST00000593739;ENST00000598104;ENST00000598547;ENST00000593420;ENST00000598792;ENST00000602159;ENST00000602132;ENST00000596224;ENST00000597709;ENST00000388925;ENST00000601637;ENST00000599287	C3 and PZP like alpha-2-macroglobulin domain containing 8 [Source:HGNC Symbol;Acc:HGNC:23228]	protein_coding;retained_intron;processed_transcript;nonsense_mediated_decay	0.416745	-1.26276	1.42767e-06	down
ENSG00000160685	ZBTB7B	ENST00000535420;ENST00000368426;ENST00000292176;ENST00000487542;ENST00000461530;ENST00000417934;ENST00000483226	zinc finger and BTB domain containing 7B [Source:HGNC Symbol;Acc:HGNC:18668]	protein_coding;processed_transcript	0.417181	-1.26125	7.62237e-07	down
ENSG00000182985	CADM1	ENST00000536727;ENST00000331581;ENST00000537058;ENST00000452722;ENST00000616271;ENST00000546000;ENST00000542447;ENST00000541434;ENST00000543375;ENST00000540373;ENST00000537140;ENST00000543249;ENST00000540852;ENST00000545960;ENST00000542450;ENST00000536781;ENST00000543540;ENST00000545380;ENST00000545094;ENST00000540951;ENST00000441886;ENST00000612235	cell adhesion molecule 1 [Source:HGNC Symbol;Acc:HGNC:5951]	protein_coding;retained_intron;processed_transcript;nonsense_mediated_decay	0.417334	-1.26072	8.54573e-14	down
ENSG00000149054	ZNF215	ENST00000527171;ENST00000278319;ENST00000529755;ENST00000636097;ENST00000414517;ENST00000610573;ENST00000529903;ENST00000532533;ENST00000636606	zinc finger protein 215 [Source:HGNC Symbol;Acc:HGNC:13007]	processed_transcript;protein_coding;nonsense_mediated_decay	0.417621	-1.25973	0.000706507	down
ENSG00000126778	SIX1	ENST00000645694;ENST00000555627;ENST00000553535;ENST00000554986;ENST00000555955	SIX homeobox 1 [Source:HGNC Symbol;Acc:HGNC:10887]	protein_coding;retained_intron;processed_transcript	0.417977	-1.25851	0.0221498	down
ENSG00000163545	NUAK2	ENST00000367157	NUAK family kinase 2 [Source:HGNC Symbol;Acc:HGNC:29558]	protein_coding	0.418656	-1.25616	2.95555e-13	down
ENSG00000171928	TVP23B	ENST00000476139;ENST00000307767;ENST00000574226;ENST00000482741;ENST00000574294;ENST00000581733;ENST00000575261;ENST00000571018;ENST00000582288;ENST00000572845	trans-golgi network vesicle protein 23 homolog B [Source:HGNC Symbol;Acc:HGNC:20399]	protein_coding;retained_intron;nonsense_mediated_decay	0.418832	-1.25556	3.80617e-05	down
ENSG00000185697	MYBL1	ENST00000522677;ENST00000524176;ENST00000522419;ENST00000517885;ENST00000523304;ENST00000518079	MYB proto-oncogene like 1 [Source:HGNC Symbol;Acc:HGNC:7547]	protein_coding;processed_transcript;retained_intron	0.419492	-1.25329	0.00112995	down
ENSG00000198832	SELENOM	ENST00000490967;ENST00000611680;ENST00000469262;ENST00000491958;ENST00000465447;ENST00000402395;ENST00000465536;ENST00000495533;ENST00000400299;ENST00000460642	selenoprotein M [Source:HGNC Symbol;Acc:HGNC:30397]	retained_intron;protein_coding;processed_transcript	0.420137	-1.25107	0.000529323	down
ENSG00000205710	C17orf107	ENST00000381365;ENST00000521575	chromosome 17 open reading frame 107 [Source:HGNC Symbol;Acc:HGNC:37238]	protein_coding	0.420608	-1.24945	0.0444117	down
ENSG00000008277	ADAM22	ENST00000439864;ENST00000398204;ENST00000398209;ENST00000478920;ENST00000426930;ENST00000398201;ENST00000265727;ENST00000413139;ENST00000476330;ENST00000412441;ENST00000398203	ADAM metallopeptidase domain 22 [Source:HGNC Symbol;Acc:HGNC:201]	protein_coding;processed_transcript	0.421664	-1.24583	0.00103798	down
ENSG00000080854	IGSF9B	ENST00000533871;ENST00000527648;ENST00000564347;ENST00000533160;ENST00000321016;ENST00000526663;ENST00000530957	immunoglobulin superfamily member 9B [Source:HGNC Symbol;Acc:HGNC:32326]	protein_coding;retained_intron;processed_transcript	0.422173	-1.24409	4.89537e-10	down
ENSG00000168143	FAM83B	ENST00000306858	family with sequence similarity 83 member B [Source:HGNC Symbol;Acc:HGNC:21357]	protein_coding	0.422218	-1.24394	2.39164e-06	down
ENSG00000106631	MYL7	ENST00000446581;ENST00000457314;ENST00000223364;ENST00000457910;ENST00000476118;ENST00000434895;ENST00000458240;ENST00000447951;ENST00000431289;ENST00000431007	myosin light chain 7 [Source:HGNC Symbol;Acc:HGNC:21719]	protein_coding;nonsense_mediated_decay;retained_intron;processed_transcript	0.422269	-1.24376	6.25879e-09	down
ENSG00000183856	IQGAP3	ENST00000361170;ENST00000491900;ENST00000476565;ENST00000498755	IQ motif containing GTPase activating protein 3 [Source:HGNC Symbol;Acc:HGNC:20669]	protein_coding;nonsense_mediated_decay;processed_transcript	0.422395	-1.24333	1.83097e-10	down
ENSG00000162728	KCNJ9	ENST00000368088	potassium inwardly rectifying channel subfamily J member 9 [Source:HGNC Symbol;Acc:HGNC:6270]	protein_coding	0.422409	-1.24329	0.000201126	down
ENSG00000241258	CRCP	ENST00000360415;ENST00000395326;ENST00000338592;ENST00000431089;ENST00000492264;ENST00000486848;ENST00000398684	CGRP receptor component [Source:HGNC Symbol;Acc:HGNC:17888]	nonsense_mediated_decay;protein_coding;processed_transcript;retained_intron	0.422705	-1.24228	0.000210221	down
ENSG00000157557	ETS2	ENST00000360938;ENST00000456966;ENST00000662305;ENST00000653642;ENST00000665212;ENST00000666778;ENST00000360214;ENST00000667466;ENST00000432278	ETS proto-oncogene 2, transcription factor [Source:HGNC Symbol;Acc:HGNC:3489]	protein_coding	0.423375	-1.23999	4.32446e-11	down
ENSG00000147010	SH3KBP1	ENST00000397821;ENST00000379716;ENST00000494961;ENST00000431164;ENST00000379726;ENST00000379698;ENST00000379697;ENST00000432234;ENST00000477102	SH3 domain containing kinase binding protein 1 [Source:HGNC Symbol;Acc:HGNC:13867]	protein_coding;processed_transcript	0.423387	-1.23995	2.17223e-13	down
ENSG00000162757	C1orf74	ENST00000294811	chromosome 1 open reading frame 74 [Source:HGNC Symbol;Acc:HGNC:26319]	protein_coding	0.423764	-1.23867	7.89081e-06	down
ENSG00000272636	DOC2B	ENST00000613549;ENST00000609727;ENST00000343572	double C2 domain beta [Source:HGNC Symbol;Acc:HGNC:2986]	protein_coding;processed_transcript;retained_intron	0.423841	-1.2384	0.00131414	down
ENSG00000154429	CCSAP	ENST00000366687;ENST00000366686;ENST00000483092;ENST00000284617	centriole, cilia and spindle associated protein [Source:HGNC Symbol;Acc:HGNC:29578]	protein_coding;processed_transcript	0.424356	-1.23665	1.66285e-08	down
ENSG00000132819	RBM38	ENST00000356208;ENST00000440234;ENST00000371219;ENST00000344785;ENST00000342690	RNA binding motif protein 38 [Source:HGNC Symbol;Acc:HGNC:15818]	protein_coding;nonsense_mediated_decay	0.424416	-1.23645	0.000359944	down
ENSG00000062038	CDH3	ENST00000429102;ENST00000264012;ENST00000542274;ENST00000566808;ENST00000568292;ENST00000565453;ENST00000567674;ENST00000569036;ENST00000569080;ENST00000569117	cadherin 3 [Source:HGNC Symbol;Acc:HGNC:1762]	protein_coding;nonsense_mediated_decay;processed_transcript	0.424606	-1.2358	8.03425e-11	down
ENSG00000118160	SLC8A2	ENST00000236877;ENST00000597014;ENST00000601757;ENST00000600576;ENST00000542837;ENST00000594353;ENST00000539381	solute carrier family 8 member A2 [Source:HGNC Symbol;Acc:HGNC:11069]	protein_coding;processed_transcript;retained_intron	0.425181	-1.23385	1.19066e-05	down
ENSG00000151388	ADAMTS12	ENST00000504830;ENST00000352040;ENST00000504582;ENST00000515401;ENST00000506952;ENST00000509762	ADAM metallopeptidase with thrombospondin type 1 motif 12 [Source:HGNC Symbol;Acc:HGNC:14605]	protein_coding;processed_transcript	0.425182	-1.23385	5.08976e-12	down
ENSG00000076351	SLC46A1	ENST00000618626;ENST00000584995;ENST00000612814;ENST00000619923;ENST00000584426;ENST00000582735;ENST00000581516;ENST00000578217;ENST00000582590	solute carrier family 46 member 1 [Source:HGNC Symbol;Acc:HGNC:30521]	protein_coding;retained_intron;processed_transcript	0.425539	-1.23264	8.61871e-06	down
ENSG00000180198	RCC1	ENST00000373832;ENST00000411533;ENST00000398958;ENST00000649185;ENST00000427469;ENST00000486790;ENST00000373831;ENST00000434290;ENST00000430407;ENST00000478232;ENST00000429051;ENST00000373833;ENST00000419074	regulator of chromosome condensation 1 [Source:HGNC Symbol;Acc:HGNC:1913]	protein_coding;retained_intron;processed_transcript	0.426015	-1.23102	1.04362e-09	down
ENSG00000177508	IRX3	ENST00000329734;ENST00000558054;ENST00000558180	iroquois homeobox 3 [Source:HGNC Symbol;Acc:HGNC:14360]	protein_coding;retained_intron	0.426081	-1.2308	0.000489401	down
ENSG00000179403	VWA1	ENST00000476993;ENST00000338660;ENST00000471398;ENST00000495558	von Willebrand factor A domain containing 1 [Source:HGNC Symbol;Acc:HGNC:30910]	protein_coding	0.42668	-1.22877	1.09323e-09	down
ENSG00000149243	KLHL35	ENST00000376292;ENST00000460787;ENST00000624466;ENST00000539798;ENST00000527491	kelch like family member 35 [Source:HGNC Symbol;Acc:HGNC:26597]	protein_coding;retained_intron;TEC	0.427552	-1.22583	2.70845e-06	down
ENSG00000170412	GPRC5C	ENST00000392627;ENST00000652232;ENST00000482723;ENST00000582473;ENST00000481232;ENST00000342648;ENST00000392629;ENST00000582873;ENST00000581590;ENST00000652294;ENST00000577663;ENST00000392628;ENST00000582444	G protein-coupled receptor class C group 5 member C [Source:HGNC Symbol;Acc:HGNC:13309]	protein_coding;retained_intron;processed_transcript	0.428051	-1.22415	3.23271e-05	down
ENSG00000182963	GJC1	ENST00000592524;ENST00000330514;ENST00000587239;ENST00000590758;ENST00000586267;ENST00000591424;ENST00000586347;ENST00000587113	gap junction protein gamma 1 [Source:HGNC Symbol;Acc:HGNC:4280]	protein_coding	0.42818	-1.22371	0.000462335	down
ENSG00000149218	ENDOD1	ENST00000278505	endonuclease domain containing 1 [Source:HGNC Symbol;Acc:HGNC:29129]	protein_coding	0.429037	-1.22082	3.28106e-09	down
ENSG00000136160	EDNRB	ENST00000377211;ENST00000475537;ENST00000643890;ENST00000645696;ENST00000646605;ENST00000646607;ENST00000626030;ENST00000646948	endothelin receptor type B [Source:HGNC Symbol;Acc:HGNC:3180]	protein_coding	0.429616	-1.21888	0.0129105	down
ENSG00000255423	EBLN2	ENST00000533473	endogenous Bornavirus like nucleoprotein 2 [Source:HGNC Symbol;Acc:HGNC:25493]	protein_coding	0.429631	-1.21883	0.0238898	down
ENSG00000110719	TCIRG1	ENST00000533005;ENST00000532635;ENST00000265686;ENST00000530449;ENST00000525724;ENST00000527530;ENST00000524870;ENST00000528981;ENST00000533947;ENST00000525516;ENST00000529657;ENST00000529364;ENST00000530802;ENST00000524598;ENST00000530063;ENST00000534673	T cell immune regulator 1, ATPase H+ transporting V0 subunit a3 [Source:HGNC Symbol;Acc:HGNC:11647]	retained_intron;protein_coding;nonsense_mediated_decay;processed_transcript	0.4302	-1.21692	0.00130198	down
ENSG00000137831	UACA	ENST00000322954;ENST00000379983;ENST00000558758;ENST00000560951;ENST00000560441;ENST00000539319;ENST00000560831;ENST00000559206;ENST00000558308;ENST00000559290;ENST00000560523;ENST00000560167;ENST00000559156;ENST00000559183	uveal autoantigen with coiled-coil domains and ankyrin repeats [Source:HGNC Symbol;Acc:HGNC:15947]	protein_coding;retained_intron;processed_transcript	0.430206	-1.2169	7.14864e-09	down
ENSG00000077942	FBLN1	ENST00000262722;ENST00000327858;ENST00000451475;ENST00000455233;ENST00000402984;ENST00000439835;ENST00000437711;ENST00000454279;ENST00000445110;ENST00000442170;ENST00000460538;ENST00000460300;ENST00000484531;ENST00000476366;ENST00000411478;ENST00000465578;ENST00000340923;ENST00000450975	fibulin 1 [Source:HGNC Symbol;Acc:HGNC:3600]	protein_coding;nonsense_mediated_decay;retained_intron;processed_transcript	0.430469	-1.21602	1.04074e-08	down
ENSG00000107796	ACTA2	ENST00000224784;ENST00000415557;ENST00000458159;ENST00000482085;ENST00000480297;ENST00000488967	actin alpha 2, smooth muscle [Source:HGNC Symbol;Acc:HGNC:130]	protein_coding;processed_transcript	0.431048	-1.21408	3.40973e-13	down
ENSG00000187068	C3orf70	ENST00000335012	chromosome 3 open reading frame 70 [Source:HGNC Symbol;Acc:HGNC:33731]	protein_coding	0.431226	-1.21349	8.64117e-06	down
ENSG00000168502	MTCL1	ENST00000518815;ENST00000520495;ENST00000359865;ENST00000306329;ENST00000520926;ENST00000581670;ENST00000523811;ENST00000522592;ENST00000517554;ENST00000522146;ENST00000400050;ENST00000521018;ENST00000517570;ENST00000523122;ENST00000519823;ENST00000518226	microtubule crosslinking factor 1 [Source:HGNC Symbol;Acc:HGNC:29121]	protein_coding;nonsense_mediated_decay;retained_intron;processed_transcript	0.431705	-1.21188	1.11336e-10	down
ENSG00000196569	LAMA2	ENST00000421865;ENST00000494137;ENST00000466230;ENST00000618192;ENST00000645154;ENST00000498257;ENST00000617695	laminin subunit alpha 2 [Source:HGNC Symbol;Acc:HGNC:6482]	protein_coding;processed_transcript	0.432024	-1.21082	0.000116705	down
ENSG00000130513	GDF15	ENST00000252809;ENST00000594925;ENST00000597765;ENST00000604609;ENST00000595973	growth differentiation factor 15 [Source:HGNC Symbol;Acc:HGNC:30142]	protein_coding;processed_transcript	0.432949	-1.20773	0.000405862	down
ENSG00000159307	SCUBE1	ENST00000360835;ENST00000290460;ENST00000470433;ENST00000449304;ENST00000480833;ENST00000461595;ENST00000477991;ENST00000615096	signal peptide, CUB domain and EGF like domain containing 1 [Source:HGNC Symbol;Acc:HGNC:13441]	protein_coding;processed_transcript	0.433092	-1.20726	2.84958e-07	down
ENSG00000166159	LRTM2	ENST00000543818;ENST00000299194;ENST00000543694;ENST00000540378;ENST00000544489;ENST00000546157;ENST00000539859;ENST00000546167;ENST00000543730;ENST00000535041;ENST00000545157;ENST00000542529	leucine rich repeats and transmembrane domains 2 [Source:HGNC Symbol;Acc:HGNC:32443]	protein_coding;processed_transcript	0.434177	-1.20364	0.0242347	down
ENSG00000258839	MC1R	ENST00000555147;ENST00000555427;ENST00000639847;ENST00000539976	melanocortin 1 receptor [Source:HGNC Symbol;Acc:HGNC:6929]	protein_coding;retained_intron	0.434374	-1.20299	0.0200504	down
ENSG00000002933	TMEM176A	ENST00000484928;ENST00000475007;ENST00000475536;ENST00000494349;ENST00000474166;ENST00000004103;ENST00000468689;ENST00000481305;ENST00000475710;ENST00000462826;ENST00000461345	transmembrane protein 176A [Source:HGNC Symbol;Acc:HGNC:24930]	protein_coding;retained_intron	0.43486	-1.20138	0.0058651	down
ENSG00000141068	KSR1	ENST00000579961;ENST00000398988;ENST00000644974;ENST00000582410;ENST00000582311;ENST00000583998;ENST00000579399;ENST00000578981;ENST00000580430;ENST00000581975;ENST00000398985;ENST00000583525;ENST00000579309;ENST00000644418;ENST00000509603;ENST00000398982;ENST00000577823;ENST00000583370;ENST00000268763;ENST00000580822	kinase suppressor of ras 1 [Source:HGNC Symbol;Acc:HGNC:6465]	processed_transcript;protein_coding;retained_intron;nonsense_mediated_decay	0.435465	-1.19937	8.33836e-09	down
ENSG00000196132	MYT1	ENST00000536311;ENST00000650655;ENST00000328439;ENST00000360149;ENST00000644172;ENST00000610671;ENST00000622439;ENST00000659024	myelin transcription factor 1 [Source:HGNC Symbol;Acc:HGNC:7622]	protein_coding;processed_transcript	0.435767	-1.19837	1.58955e-08	down
ENSG00000145626	UGT3A1	ENST00000274278;ENST00000515801;ENST00000513233;ENST00000625798;ENST00000503189;ENST00000507113;ENST00000333811	UDP glycosyltransferase family 3 member A1 [Source:HGNC Symbol;Acc:HGNC:26625]	protein_coding;nonsense_mediated_decay;processed_transcript	0.43615	-1.1971	6.45395e-05	down
ENSG00000138083	SIX3	ENST00000260653	SIX homeobox 3 [Source:HGNC Symbol;Acc:HGNC:10889]	protein_coding	0.436316	-1.19655	6.40317e-06	down
ENSG00000241973	PI4KA	ENST00000255882;ENST00000485963;ENST00000492581;ENST00000489966;ENST00000484220;ENST00000485123;ENST00000462210;ENST00000494113;ENST00000466772;ENST00000466162;ENST00000399213;ENST00000477245;ENST00000475414;ENST00000477368;ENST00000466394;ENST00000485950;ENST00000482030;ENST00000449120	phosphatidylinositol 4-kinase alpha [Source:HGNC Symbol;Acc:HGNC:8983]	protein_coding;retained_intron;processed_transcript	0.436443	-1.19613	3.98554e-13	down
ENSG00000102554	KLF5	ENST00000377687;ENST00000476859;ENST00000539231;ENST00000464404;ENST00000477333	Kruppel like factor 5 [Source:HGNC Symbol;Acc:HGNC:6349]	protein_coding;processed_transcript	0.436542	-1.19581	2.00383e-05	down
ENSG00000128564	VGF	ENST00000249330;ENST00000445482;ENST00000611537	VGF nerve growth factor inducible [Source:HGNC Symbol;Acc:HGNC:12684]	protein_coding	0.436589	-1.19565	0.00156639	down
ENSG00000136010	ALDH1L2	ENST00000258494;ENST00000549335;ENST00000548418;ENST00000552427;ENST00000550088;ENST00000652515;ENST00000552270	aldehyde dehydrogenase 1 family member L2 [Source:HGNC Symbol;Acc:HGNC:26777]	protein_coding;retained_intron;processed_transcript;nonsense_mediated_decay	0.436866	-1.19474	2.68464e-08	down
ENSG00000111321	LTBR	ENST00000546296;ENST00000539925;ENST00000228918;ENST00000536876;ENST00000544454;ENST00000441074;ENST00000542830;ENST00000440421;ENST00000535739;ENST00000444814;ENST00000543190;ENST00000545445;ENST00000541102;ENST00000541005;ENST00000543542	lymphotoxin beta receptor [Source:HGNC Symbol;Acc:HGNC:6718]	processed_transcript;protein_coding;nonsense_mediated_decay;retained_intron	0.437399	-1.19298	0.00286268	down
ENSG00000197442	MAP3K5	ENST00000359015;ENST00000463140	mitogen-activated protein kinase kinase kinase 5 [Source:HGNC Symbol;Acc:HGNC:6857]	protein_coding;processed_transcript	0.437653	-1.19214	0.00769475	down
ENSG00000132437	DDC	ENST00000622873;ENST00000494914;ENST00000357936;ENST00000617822;ENST00000615193;ENST00000489162;ENST00000420203;ENST00000430300;ENST00000495320;ENST00000380984;ENST00000426377;ENST00000431062;ENST00000444124;ENST00000444733	dopa decarboxylase [Source:HGNC Symbol;Acc:HGNC:2719]	protein_coding;retained_intron;processed_transcript;nonsense_mediated_decay	0.437698	-1.19199	0.000291803	down
ENSG00000197457	STMN3	ENST00000540534;ENST00000370053;ENST00000634126;ENST00000632676;ENST00000631920	stathmin 3 [Source:HGNC Symbol;Acc:HGNC:15926]	protein_coding	0.437929	-1.19123	1.37754e-07	down
ENSG00000149090	PAMR1	ENST00000619888;ENST00000611014;ENST00000622144;ENST00000527605;ENST00000534803;ENST00000529303;ENST00000621476;ENST00000615849;ENST00000531219	peptidase domain containing associated with muscle regeneration 1 [Source:HGNC Symbol;Acc:HGNC:24554]	protein_coding;processed_transcript;retained_intron	0.438524	-1.18927	6.16972e-09	down
ENSG00000123307	NEUROD4	ENST00000242994	neuronal differentiation 4 [Source:HGNC Symbol;Acc:HGNC:13802]	protein_coding	0.438747	-1.18854	2.71213e-05	down
ENSG00000116667	C1orf21	ENST00000235307;ENST00000477517;ENST00000648109;ENST00000675148;ENST00000367514;ENST00000675061;ENST00000675405;ENST00000489143	chromosome 1 open reading frame 21 [Source:HGNC Symbol;Acc:HGNC:15494]	protein_coding;processed_transcript;nonsense_mediated_decay	0.438856	-1.18818	2.40105e-07	down
ENSG00000101057	MYBL2	ENST00000396863;ENST00000217026	MYB proto-oncogene like 2 [Source:HGNC Symbol;Acc:HGNC:7548]	protein_coding	0.438962	-1.18783	5.35765e-10	down
ENSG00000113657	DPYSL3	ENST00000343218;ENST00000398514;ENST00000508042;ENST00000512722;ENST00000519672;ENST00000523458;ENST00000520473;ENST00000504965;ENST00000507309	dihydropyrimidinase like 3 [Source:HGNC Symbol;Acc:HGNC:3015]	protein_coding;retained_intron;processed_transcript;nonsense_mediated_decay	0.439332	-1.18662	2.55201e-11	down
ENSG00000174749	FAM241A	ENST00000309733	family with sequence similarity 241 member A [Source:HGNC Symbol;Acc:HGNC:26813]	protein_coding	0.43938	-1.18646	0.0195709	down
ENSG00000125912	NCLN	ENST00000587740;ENST00000592737;ENST00000246117;ENST00000586904;ENST00000592235;ENST00000591062;ENST00000588428;ENST00000590671	nicalin [Source:HGNC Symbol;Acc:HGNC:26923]	nonsense_mediated_decay;protein_coding;processed_transcript	0.439969	-1.18453	9.19146e-10	down
ENSG00000111252	SH2B3	ENST00000341259;ENST00000550925;ENST00000538307	SH2B adaptor protein 3 [Source:HGNC Symbol;Acc:HGNC:29605]	protein_coding	0.440253	-1.18359	4.43366e-07	down
ENSG00000124302	CHST8	ENST00000438847;ENST00000262622;ENST00000650847;ENST00000604556;ENST00000434302;ENST00000591231	carbohydrate sulfotransferase 8 [Source:HGNC Symbol;Acc:HGNC:15993]	protein_coding;processed_transcript	0.441067	-1.18093	0.00821929	down
ENSG00000162998	FRZB	ENST00000295113	frizzled related protein [Source:HGNC Symbol;Acc:HGNC:3959]	protein_coding	0.441558	-1.17933	0.0122287	down
ENSG00000196482	ESRRG	ENST00000616180;ENST00000408911;ENST00000481543;ENST00000361395;ENST00000359162;ENST00000459825;ENST00000488947;ENST00000475275;ENST00000361525;ENST00000493603;ENST00000469913;ENST00000366938;ENST00000586199;ENST00000673908;ENST00000477799;ENST00000459955;ENST00000469486;ENST00000471371;ENST00000463665;ENST00000487276;ENST00000366937;ENST00000366940;ENST00000493748;ENST00000391890;ENST00000360012	estrogen related receptor gamma [Source:HGNC Symbol;Acc:HGNC:3474]	protein_coding;processed_transcript;nonsense_mediated_decay	0.441804	-1.17852	4.19196e-05	down
ENSG00000173598	NUDT4	ENST00000549992;ENST00000337179;ENST00000415493;ENST00000550056;ENST00000548662;ENST00000547014;ENST00000546925	nudix hydrolase 4 [Source:HGNC Symbol;Acc:HGNC:8051]	protein_coding	0.442134	-1.17744	0.00146565	down
ENSG00000153094	BCL2L11	ENST00000393256;ENST00000620862;ENST00000621302;ENST00000308659;ENST00000622509;ENST00000415458;ENST00000437029;ENST00000438054;ENST00000405953;ENST00000615946;ENST00000619294;ENST00000452231;ENST00000610735;ENST00000357757;ENST00000436733;ENST00000622612;ENST00000337565;ENST00000439718;ENST00000433098;ENST00000393252;ENST00000361493;ENST00000431217;ENST00000432179	BCL2 like 11 [Source:HGNC Symbol;Acc:HGNC:994]	protein_coding;nonsense_mediated_decay	0.44244	-1.17645	0.012679	down
ENSG00000059728	MXD1	ENST00000264444;ENST00000540449;ENST00000435990;ENST00000409442;ENST00000410000;ENST00000465446	MAX dimerization protein 1 [Source:HGNC Symbol;Acc:HGNC:6761]	protein_coding;nonsense_mediated_decay;retained_intron;processed_transcript	0.443355	-1.17347	3.28799e-05	down
ENSG00000198932	GPRASP1	ENST00000361600;ENST00000415986;ENST00000537097;ENST00000444152;ENST00000652542;ENST00000466098	G protein-coupled receptor associated sorting protein 1 [Source:HGNC Symbol;Acc:HGNC:24834]	protein_coding;retained_intron	0.443594	-1.17269	0.0236816	down
ENSG00000102908	NFAT5	ENST00000426654;ENST00000354436;ENST00000393742;ENST00000566899;ENST00000349945;ENST00000565301;ENST00000567990;ENST00000567239;ENST00000650987;ENST00000568832;ENST00000563474;ENST00000562429;ENST00000627621	nuclear factor of activated T cells 5 [Source:HGNC Symbol;Acc:HGNC:7774]	nonsense_mediated_decay;protein_coding;retained_intron	0.443633	-1.17256	0.00854672	down
ENSG00000186193	SAPCD2	ENST00000409687	suppressor APC domain containing 2 [Source:HGNC Symbol;Acc:HGNC:28055]	protein_coding	0.444008	-1.17134	0.000102022	down
ENSG00000156427	FGF18	ENST00000274625	fibroblast growth factor 18 [Source:HGNC Symbol;Acc:HGNC:3674]	protein_coding	0.444755	-1.16892	0.00433978	down
ENSG00000116678	LEPR	ENST00000462765;ENST00000616738;ENST00000349533;ENST00000371059;ENST00000371060;ENST00000344610;ENST00000471762;ENST00000371058	leptin receptor [Source:HGNC Symbol;Acc:HGNC:6554]	processed_transcript;protein_coding	0.445034	-1.16801	5.66759e-08	down
ENSG00000171130	ATP6V0E2	ENST00000615196;ENST00000649866;ENST00000456496;ENST00000479613;ENST00000464662;ENST00000425642;ENST00000490092;ENST00000611515;ENST00000495408;ENST00000421974;ENST00000464683;ENST00000606024;ENST00000483478;ENST00000471877	ATPase H+ transporting V0 subunit e2 [Source:HGNC Symbol;Acc:HGNC:21723]	protein_coding;nonsense_mediated_decay;processed_transcript	0.445258	-1.16729	1.41972e-10	down
ENSG00000104112	SCG3	ENST00000220478;ENST00000558709;ENST00000542355	secretogranin III [Source:HGNC Symbol;Acc:HGNC:13707]	protein_coding	0.445741	-1.16572	1.04482e-07	down
ENSG00000089639	GMIP	ENST00000587238;ENST00000203556;ENST00000591047;ENST00000587205;ENST00000593186;ENST00000587713;ENST00000586269;ENST00000588171	GEM interacting protein [Source:HGNC Symbol;Acc:HGNC:24852]	protein_coding;nonsense_mediated_decay;retained_intron;processed_transcript	0.446179	-1.1643	7.53327e-08	down
ENSG00000186480	INSIG1	ENST00000340368;ENST00000476756;ENST00000425172;ENST00000468307;ENST00000342407;ENST00000344756	insulin induced gene 1 [Source:HGNC Symbol;Acc:HGNC:6083]	protein_coding;retained_intron	0.446191	-1.16427	1.51848e-06	down
ENSG00000157483	MYO1E	ENST00000288235;ENST00000558182;ENST00000559489;ENST00000558571;ENST00000558814;ENST00000559269;ENST00000559412;ENST00000560642;ENST00000558646;ENST00000560749	myosin IE [Source:HGNC Symbol;Acc:HGNC:7599]	protein_coding;processed_transcript;nonsense_mediated_decay;retained_intron	0.446537	-1.16315	4.36297e-08	down
ENSG00000106689	LHX2	ENST00000373615;ENST00000446480;ENST00000560961;ENST00000488674	LIM homeobox 2 [Source:HGNC Symbol;Acc:HGNC:6594]	protein_coding	0.446799	-1.1623	9.45224e-06	down
ENSG00000116017	ARID3A	ENST00000263620;ENST00000585733;ENST00000587532;ENST00000592216;ENST00000590749;ENST00000585895;ENST00000457152	AT-rich interaction domain 3A [Source:HGNC Symbol;Acc:HGNC:3031]	protein_coding;retained_intron;processed_transcript;nonsense_mediated_decay	0.446894	-1.16199	1.73929e-12	down
ENSG00000232593	KANTR	ENST00000604062;ENST00000603385;ENST00000366185;ENST00000605526;ENST00000604849	KDM5C adjacent transcript [Source:HGNC Symbol;Acc:HGNC:49510]	protein_coding;processed_transcript	0.447251	-1.16084	7.55957e-05	down
ENSG00000132359	RAP1GAP2	ENST00000366401;ENST00000571555;ENST00000254695;ENST00000637138;ENST00000575979;ENST00000574709;ENST00000542807;ENST00000540393;ENST00000574515	RAP1 GTPase activating protein 2 [Source:HGNC Symbol;Acc:HGNC:29176]	protein_coding;retained_intron;processed_transcript	0.447371	-1.16046	7.7545e-08	down
ENSG00000173890	GPR160	ENST00000355897;ENST00000473675;ENST00000478364;ENST00000482813;ENST00000492924;ENST00000492492;ENST00000485735;ENST00000491740;ENST00000482710;ENST00000476668	G protein-coupled receptor 160 [Source:HGNC Symbol;Acc:HGNC:23693]	protein_coding;processed_transcript	0.447746	-1.15925	0.0179284	down
ENSG00000188290	HES4	ENST00000481869;ENST00000484667;ENST00000428771;ENST00000304952	hes family bHLH transcription factor 4 [Source:HGNC Symbol;Acc:HGNC:24149]	retained_intron;protein_coding	0.447881	-1.15881	1.21889e-05	down
ENSG00000119630	PGF	ENST00000555567;ENST00000557748;ENST00000553716;ENST00000405431;ENST00000238607;ENST00000555253;ENST00000556939;ENST00000555234	placental growth factor [Source:HGNC Symbol;Acc:HGNC:8893]	protein_coding;retained_intron	0.448049	-1.15827	0.0124402	down
ENSG00000166710	B2M	ENST00000648006;ENST00000623550;ENST00000559916;ENST00000559720;ENST00000544417;ENST00000560681;ENST00000632133;ENST00000561139;ENST00000557901;ENST00000559220;ENST00000559907;ENST00000561424;ENST00000349264;ENST00000560556	beta-2-microglobulin [Source:HGNC Symbol;Acc:HGNC:914]	protein_coding;retained_intron;nonsense_mediated_decay;processed_transcript	0.448471	-1.15691	1.77918e-10	down
ENSG00000051180	RAD51	ENST00000267868;ENST00000423169;ENST00000527860;ENST00000525066;ENST00000382643;ENST00000533741;ENST00000532743;ENST00000645673;ENST00000526763;ENST00000531277;ENST00000557850	RAD51 recombinase [Source:HGNC Symbol;Acc:HGNC:9817]	protein_coding;nonsense_mediated_decay	0.448563	-1.15662	1.00377e-05	down
ENSG00000114812	VIPR1	ENST00000433647;ENST00000446673;ENST00000473495;ENST00000439731;ENST00000498102;ENST00000490161;ENST00000439910;ENST00000487545;ENST00000438259;ENST00000450274;ENST00000495189;ENST00000473575;ENST00000325123;ENST00000543411;ENST00000465338;ENST00000443646;ENST00000436487	vasoactive intestinal peptide receptor 1 [Source:HGNC Symbol;Acc:HGNC:12694]	protein_coding;nonsense_mediated_decay;processed_transcript;retained_intron	0.448788	-1.15589	0.0373203	down
ENSG00000117115	PADI2	ENST00000375486;ENST00000375481;ENST00000479534;ENST00000466151	peptidyl arginine deiminase 2 [Source:HGNC Symbol;Acc:HGNC:18341]	protein_coding;processed_transcript	0.448901	-1.15553	0.0282795	down
ENSG00000109320	NFKB1	ENST00000394820;ENST00000600343;ENST00000226574;ENST00000505458;ENST00000502367;ENST00000652619;ENST00000509165;ENST00000513803;ENST00000507079;ENST00000652569;ENST00000510638;ENST00000508584;ENST00000504044;ENST00000511926	nuclear factor kappa B subunit 1 [Source:HGNC Symbol;Acc:HGNC:7794]	protein_coding;retained_intron;nonsense_mediated_decay;processed_transcript	0.449808	-1.15262	9.2903e-08	down
ENSG00000197892	KIF13B	ENST00000524189;ENST00000523130;ENST00000523968;ENST00000522355;ENST00000521515;ENST00000522846	kinesin family member 13B [Source:HGNC Symbol;Acc:HGNC:14405]	protein_coding;nonsense_mediated_decay;retained_intron	0.4505	-1.1504	2.3187e-08	down
ENSG00000115266	APC2	ENST00000233607;ENST00000535453;ENST00000590469;ENST00000238483;ENST00000593146;ENST00000587869;ENST00000590877;ENST00000587149	APC regulator of WNT signaling pathway 2 [Source:HGNC Symbol;Acc:HGNC:24036]	protein_coding;retained_intron	0.450634	-1.14997	0.00704787	down
ENSG00000196371	FUT4	ENST00000358752	fucosyltransferase 4 [Source:HGNC Symbol;Acc:HGNC:4015]	protein_coding	0.451008	-1.14878	2.38725e-05	down
ENSG00000124067	SLC12A4	ENST00000573023;ENST00000316341;ENST00000576616;ENST00000570802;ENST00000541864;ENST00000576462;ENST00000571299;ENST00000537830;ENST00000575857;ENST00000570616;ENST00000574665;ENST00000572037;ENST00000572476;ENST00000572766;ENST00000422611;ENST00000572010;ENST00000576513;ENST00000573702;ENST00000576377	solute carrier family 12 member 4 [Source:HGNC Symbol;Acc:HGNC:10913]	retained_intron;protein_coding;nonsense_mediated_decay;processed_transcript	0.451342	-1.14771	3.57524e-07	down
ENSG00000229544	NKX1-2	ENST00000451024	NK1 homeobox 2 [Source:HGNC Symbol;Acc:HGNC:31652]	protein_coding	0.451374	-1.1476	0.000297929	down
ENSG00000072786	STK10	ENST00000176763;ENST00000517360;ENST00000521322;ENST00000519441;ENST00000522936;ENST00000517381;ENST00000519710;ENST00000518267;ENST00000517527;ENST00000522879;ENST00000520476;ENST00000523615;ENST00000519269;ENST00000517775;ENST00000517524;ENST00000523603	serine/threonine kinase 10 [Source:HGNC Symbol;Acc:HGNC:11388]	protein_coding;retained_intron;processed_transcript	0.451377	-1.1476	3.42355e-08	down
ENSG00000157654	PALM2AKAP2	ENST00000259318;ENST00000374525;ENST00000413420;ENST00000482335;ENST00000314527;ENST00000302798;ENST00000374530;ENST00000485762;ENST00000483909;ENST00000434623;ENST00000497711;ENST00000674068;ENST00000374531;ENST00000495980;ENST00000465091;ENST00000480388;ENST00000471798	PALM2 and AKAP2 fusion [Source:HGNC Symbol;Acc:HGNC:33529]	protein_coding;processed_transcript;nonsense_mediated_decay;retained_intron	0.451423	-1.14745	2.9691e-11	down
ENSG00000104312	RIPK2	ENST00000522965;ENST00000220751;ENST00000517696;ENST00000518673	receptor interacting serine/threonine kinase 2 [Source:HGNC Symbol;Acc:HGNC:10020]	nonsense_mediated_decay;protein_coding;retained_intron	0.451448	-1.14737	5.20626e-07	down
ENSG00000122694	GLIPR2	ENST00000474050;ENST00000377959;ENST00000377960;ENST00000396613;ENST00000619700	GLI pathogenesis related 2 [Source:HGNC Symbol;Acc:HGNC:18007]	processed_transcript;protein_coding	0.451517	-1.14715	1.08701e-06	down
ENSG00000180233	ZNRF2	ENST00000323037;ENST00000459998	zinc and ring finger 2 [Source:HGNC Symbol;Acc:HGNC:22316]	protein_coding;processed_transcript	0.451781	-1.1463	6.91061e-06	down
ENSG00000185666	SYN3	ENST00000358763;ENST00000441821;ENST00000619146;ENST00000467095;ENST00000412575;ENST00000461446;ENST00000468922;ENST00000483062;ENST00000462268;ENST00000459990;ENST00000472027;ENST00000332840;ENST00000467824	synapsin III [Source:HGNC Symbol;Acc:HGNC:11496]	protein_coding;processed_transcript;retained_intron	0.452114	-1.14524	7.84533e-06	down
ENSG00000099940	SNAP29	ENST00000215730;ENST00000490458;ENST00000439214	synaptosome associated protein 29 [Source:HGNC Symbol;Acc:HGNC:11133]	protein_coding;retained_intron	0.452325	-1.14457	1.50465e-08	down
ENSG00000165490	DDIAS	ENST00000329143;ENST00000533655;ENST00000532764;ENST00000524921;ENST00000525388;ENST00000533750;ENST00000532277;ENST00000528262;ENST00000528189;ENST00000532589;ENST00000525361;ENST00000528759	DNA damage induced apoptosis suppressor [Source:HGNC Symbol;Acc:HGNC:26351]	protein_coding;processed_transcript;retained_intron	0.452362	-1.14445	0.0172295	down
ENSG00000138814	PPP3CA	ENST00000323055;ENST00000394854;ENST00000394853;ENST00000510292;ENST00000525819;ENST00000529324;ENST00000492351;ENST00000512215;ENST00000507176	protein phosphatase 3 catalytic subunit alpha [Source:HGNC Symbol;Acc:HGNC:9314]	protein_coding;processed_transcript;nonsense_mediated_decay	0.452367	-1.14443	2.0725e-10	down
ENSG00000108001	EBF3	ENST00000355311;ENST00000368648;ENST00000675373;ENST00000440978	EBF transcription factor 3 [Source:HGNC Symbol;Acc:HGNC:19087]	protein_coding;processed_transcript	0.452406	-1.14431	1.83856e-06	down
ENSG00000197971	MBP	ENST00000397860;ENST00000581878;ENST00000397865;ENST00000493247;ENST00000582282;ENST00000397875;ENST00000578873;ENST00000585216;ENST00000583474;ENST00000459948;ENST00000673800;ENST00000397868;ENST00000578193;ENST00000354542;ENST00000397866;ENST00000355994;ENST00000359645;ENST00000527975;ENST00000467108;ENST00000447114;ENST00000397869;ENST00000498683;ENST00000580473;ENST00000533278;ENST00000583798…	myelin basic protein [Source:HGNC Symbol;Acc:HGNC:6925]	protein_coding;retained_intron;processed_transcript;nonsense_mediated_decay	0.452926	-1.14265	0.000225069	down
ENSG00000100075	SLC25A1	ENST00000215882;ENST00000470922;ENST00000451283;ENST00000468824;ENST00000461267	solute carrier family 25 member 1 [Source:HGNC Symbol;Acc:HGNC:10979]	protein_coding;retained_intron;processed_transcript	0.453132	-1.142	1.65021e-05	down
ENSG00000002746	HECW1	ENST00000395891;ENST00000453890;ENST00000429529;ENST00000492310;ENST00000493057;ENST00000464944;ENST00000481031;ENST00000471527;ENST00000471043;ENST00000461842;ENST00000490954	HECT, C2 and WW domain containing E3 ubiquitin protein ligase 1 [Source:HGNC Symbol;Acc:HGNC:22195]	protein_coding;processed_transcript	0.453211	-1.14174	0.000155654	down
ENSG00000184545	DUSP8	ENST00000331588;ENST00000397374;ENST00000528778	dual specificity phosphatase 8 [Source:HGNC Symbol;Acc:HGNC:3074]	protein_coding;processed_transcript	0.45355	-1.14067	4.46358e-08	down
ENSG00000132749	TESMIN	ENST00000255087;ENST00000443940;ENST00000438124;ENST00000432435;ENST00000540869;ENST00000544398;ENST00000544963;ENST00000538944;ENST00000543240	testis expressed metallothionein like protein [Source:HGNC Symbol;Acc:HGNC:7446]	protein_coding;retained_intron;processed_transcript	0.454456	-1.13779	0.0272894	down
ENSG00000159409	CELF3	ENST00000290583;ENST00000420342;ENST00000478829;ENST00000419910;ENST00000470688;ENST00000479893;ENST00000290585	CUGBP Elav-like family member 3 [Source:HGNC Symbol;Acc:HGNC:11967]	protein_coding;processed_transcript;retained_intron	0.454778	-1.13676	5.99954e-05	down
ENSG00000165244	ZNF367	ENST00000375256	zinc finger protein 367 [Source:HGNC Symbol;Acc:HGNC:18320]	protein_coding	0.45548	-1.13454	2.42355e-05	down
ENSG00000142798	HSPG2	ENST00000374695;ENST00000486901;ENST00000412328;ENST00000644714;ENST00000481644;ENST00000480900;ENST00000498495;ENST00000439717;ENST00000374673;ENST00000493940;ENST00000374676;ENST00000427897;ENST00000453796;ENST00000635682;ENST00000471322	heparan sulfate proteoglycan 2 [Source:HGNC Symbol;Acc:HGNC:5273]	protein_coding;retained_intron;processed_transcript;non_stop_decay	0.455599	-1.13416	7.19358e-10	down
ENSG00000136603	SKIL	ENST00000490989;ENST00000458537;ENST00000465590;ENST00000259119;ENST00000426052;ENST00000470571;ENST00000413427;ENST00000490894;ENST00000477216;ENST00000476188	SKI like proto-oncogene [Source:HGNC Symbol;Acc:HGNC:10897]	processed_transcript;protein_coding;nonsense_mediated_decay;retained_intron	0.45569	-1.13388	3.33762e-06	down
ENSG00000038382	TRIO	ENST00000344135;ENST00000509967;ENST00000508717;ENST00000515144;ENST00000512070;ENST00000504606;ENST00000344204;ENST00000503399;ENST00000505971;ENST00000508343;ENST00000512303;ENST00000639876;ENST00000513206;ENST00000620511;ENST00000502816;ENST00000508283;ENST00000510757;ENST00000515710;ENST00000511019;ENST00000506611;ENST00000509354;ENST00000502490;ENST00000512979;ENST00000510281;ENST00000507714	trio Rho guanine nucleotide exchange factor [Source:HGNC Symbol;Acc:HGNC:12303]	protein_coding;retained_intron;nonsense_mediated_decay;processed_transcript	0.455894	-1.13323	9.188e-12	down
ENSG00000104313	EYA1	ENST00000388743;ENST00000388742;ENST00000388740;ENST00000644424;ENST00000645793;ENST00000645451;ENST00000303824;ENST00000493349;ENST00000521794;ENST00000642391;ENST00000643681;ENST00000644712;ENST00000340726;ENST00000465115;ENST00000519927;ENST00000647540;ENST00000518177;ENST00000496494;ENST00000523987;ENST00000419131;ENST00000644229;ENST00000388741;ENST00000422295;ENST00000523327	EYA transcriptional coactivator and phosphatase 1 [Source:HGNC Symbol;Acc:HGNC:3519]	protein_coding;processed_transcript;nonsense_mediated_decay;retained_intron	0.456109	-1.13255	0.000203573	down
ENSG00000205683	DPF3	ENST00000541685;ENST00000556509;ENST00000381216;ENST00000366353;ENST00000556891;ENST00000554594;ENST00000555781;ENST00000610283;ENST00000614862;ENST00000546183;ENST00000553608;ENST00000556238;ENST00000555469;ENST00000557704;ENST00000556997;ENST00000556902	double PHD fingers 3 [Source:HGNC Symbol;Acc:HGNC:17427]	protein_coding;nonsense_mediated_decay;processed_transcript	0.456429	-1.13154	6.1021e-05	down
ENSG00000181652	ATG9B	ENST00000605952;ENST00000469530;ENST00000611177;ENST00000471797;ENST00000466157;ENST00000476282;ENST00000617967;ENST00000473134;ENST00000498521;ENST00000404733;ENST00000639579;ENST00000473409	autophagy related 9B [Source:HGNC Symbol;Acc:HGNC:21899]	nonsense_mediated_decay;protein_coding;processed_transcript;retained_intron	0.456937	-1.12993	0.00539315	down
ENSG00000215475	SIAH3	ENST00000400405	siah E3 ubiquitin protein ligase family member 3 [Source:HGNC Symbol;Acc:HGNC:30553]	protein_coding	0.457058	-1.12955	0.00310486	down
ENSG00000164124	TMEM144	ENST00000296529;ENST00000505049;ENST00000509278;ENST00000513744;ENST00000511038;ENST00000505189;ENST00000504569;ENST00000508243;ENST00000503404;ENST00000514558;ENST00000514346;ENST00000503200;ENST00000512481;ENST00000511532;ENST00000512272;ENST00000502698;ENST00000514971	transmembrane protein 144 [Source:HGNC Symbol;Acc:HGNC:25633]	protein_coding;processed_transcript;nonsense_mediated_decay;retained_intron	0.457107	-1.1294	0.000414636	down
ENSG00000163219	ARHGAP25	ENST00000409220;ENST00000409202;ENST00000488795;ENST00000485573;ENST00000463061;ENST00000463483;ENST00000496266;ENST00000467265;ENST00000473986;ENST00000485700;ENST00000497259;ENST00000456116;ENST00000491237;ENST00000481684;ENST00000409030;ENST00000497079;ENST00000479844	Rho GTPase activating protein 25 [Source:HGNC Symbol;Acc:HGNC:28951]	protein_coding;nonsense_mediated_decay;processed_transcript	0.457173	-1.12919	0.0231472	down
ENSG00000166111	SVOP	ENST00000610966;ENST00000551211;ENST00000550436;ENST00000546618;ENST00000548229	SV2 related protein [Source:HGNC Symbol;Acc:HGNC:25417]	protein_coding;retained_intron;nonsense_mediated_decay	0.45766	-1.12765	1.07573e-06	down
ENSG00000197177	ADGRA1	ENST00000392607;ENST00000392606;ENST00000607359	adhesion G protein-coupled receptor A1 [Source:HGNC Symbol;Acc:HGNC:13838]	protein_coding	0.458241	-1.12582	0.0319468	down
ENSG00000134996	OSTF1	ENST00000346234	osteoclast stimulating factor 1 [Source:HGNC Symbol;Acc:HGNC:8510]	protein_coding	0.458291	-1.12567	1.12404e-05	down
ENSG00000158104	HPD	ENST00000543163;ENST00000535114;ENST00000542159;ENST00000289004	4-hydroxyphenylpyruvate dioxygenase [Source:HGNC Symbol;Acc:HGNC:5147]	protein_coding;retained_intron	0.458314	-1.12559	0.039173	down
ENSG00000198914	POU3F3	ENST00000674056;ENST00000361360	POU class 3 homeobox 3 [Source:HGNC Symbol;Acc:HGNC:9216]	protein_coding	0.458358	-1.12545	0.000111578	down
ENSG00000131504	DIAPH1	ENST00000647433;ENST00000476339;ENST00000523100;ENST00000389054;ENST00000472516;ENST00000491754;ENST00000518047;ENST00000468119;ENST00000524301;ENST00000647330;ENST00000643718;ENST00000643312;ENST00000448451;ENST00000494967;ENST00000389057;ENST00000518484;ENST00000253811;ENST00000398557	diaphanous related formin 1 [Source:HGNC Symbol;Acc:HGNC:2876]	protein_coding;retained_intron;nonsense_mediated_decay;processed_transcript	0.459009	-1.1234	8.77012e-12	down
ENSG00000162734	PEA15	ENST00000368077;ENST00000360472;ENST00000368076;ENST00000488858	proliferation and apoptosis adaptor protein 15 [Source:HGNC Symbol;Acc:HGNC:8822]	protein_coding;processed_transcript	0.459157	-1.12294	0.00288437	down
ENSG00000198842	DUSP27	ENST00000361200;ENST00000443333;ENST00000485151;ENST00000271385	dual specificity phosphatase 27, atypical [Source:HGNC Symbol;Acc:HGNC:25034]	protein_coding;processed_transcript	0.459289	-1.12253	0.0489543	down
ENSG00000115183	TANC1	ENST00000263635;ENST00000496406;ENST00000470074;ENST00000464096;ENST00000465963	tetratricopeptide repeat, ankyrin repeat and coiled-coil containing 1 [Source:HGNC Symbol;Acc:HGNC:29364]	protein_coding;retained_intron	0.459497	-1.12187	3.8675e-08	down
ENSG00000150722	PPP1R1C	ENST00000479855;ENST00000486067;ENST00000490645;ENST00000464264;ENST00000494189;ENST00000461410;ENST00000475249;ENST00000495820;ENST00000465612;ENST00000409702;ENST00000409137;ENST00000280295	protein phosphatase 1 regulatory inhibitor subunit 1C [Source:HGNC Symbol;Acc:HGNC:14940]	processed_transcript;retained_intron;protein_coding	0.459756	-1.12106	0.0088818	down
ENSG00000115107	STEAP3	ENST00000393110;ENST00000409811;ENST00000393107;ENST00000393106	STEAP3 metalloreductase [Source:HGNC Symbol;Acc:HGNC:24592]	protein_coding	0.459863	-1.12072	0.0122693	down
ENSG00000233421	LINC01783	ENST00000614408;ENST00000415386	long intergenic non-protein coding RNA 1783 [Source:HGNC Symbol;Acc:HGNC:52573]	pseudogene;lncRNA	0.459981	-1.12035	0.0412069	down
ENSG00000164236	ANKRD33B	ENST00000296657;ENST00000504806	ankyrin repeat domain 33B [Source:HGNC Symbol;Acc:HGNC:35240]	protein_coding;nonsense_mediated_decay	0.460099	-1.11998	2.40054e-09	down
ENSG00000081320	STK17B	ENST00000263955;ENST00000420683;ENST00000449152;ENST00000606789;ENST00000409228	serine/threonine kinase 17b [Source:HGNC Symbol;Acc:HGNC:11396]	protein_coding	0.460574	-1.1185	0.000336791	down
ENSG00000140848	CPNE2	ENST00000290776;ENST00000567011;ENST00000565874;ENST00000566042;ENST00000565951;ENST00000567487;ENST00000566259;ENST00000565766;ENST00000535318;ENST00000566910	copine 2 [Source:HGNC Symbol;Acc:HGNC:2315]	protein_coding;retained_intron;processed_transcript	0.460685	-1.11815	2.53581e-06	down
ENSG00000184557	SOCS3	ENST00000330871;ENST00000587578	suppressor of cytokine signaling 3 [Source:HGNC Symbol;Acc:HGNC:19391]	protein_coding	0.460718	-1.11804	1.43611e-05	down
ENSG00000141934	PLPP2	ENST00000621795;ENST00000633125;ENST00000434325;ENST00000327790;ENST00000586998;ENST00000591572;ENST00000589672;ENST00000269812	phospholipid phosphatase 2 [Source:HGNC Symbol;Acc:HGNC:9230]	retained_intron;protein_coding	0.460855	-1.11761	0.0352658	down
ENSG00000135502	SLC26A10	ENST00000665594;ENST00000483647;ENST00000661867;ENST00000637859;ENST00000497297;ENST00000440686;ENST00000487816;ENST00000320442;ENST00000463802;ENST00000474791;ENST00000490243	solute carrier family 26 member 10 [Source:HGNC Symbol;Acc:HGNC:14470]	transcribed_unitary_pseudogene;processed_transcript;retained_intron;protein_coding	0.461096	-1.11686	0.0268601	down
ENSG00000173801	JUP	ENST00000393931;ENST00000449889;ENST00000589036;ENST00000393930;ENST00000310706;ENST00000437369;ENST00000585793;ENST00000465293;ENST00000591690;ENST00000420370;ENST00000437187;ENST00000424457	junction plakoglobin [Source:HGNC Symbol;Acc:HGNC:6207]	protein_coding;retained_intron	0.462315	-1.11305	8.33143e-11	down
ENSG00000121210	TMEM131L	ENST00000409663;ENST00000409959;ENST00000240487;ENST00000509565;ENST00000462540;ENST00000478919;ENST00000445960;ENST00000497247	transmembrane 131 like [Source:HGNC Symbol;Acc:HGNC:29146]	protein_coding;retained_intron;nonsense_mediated_decay	0.462567	-1.11226	3.25038e-07	down
ENSG00000139618	BRCA2	ENST00000380152;ENST00000528762;ENST00000530893;ENST00000533776;ENST00000666593;ENST00000671466;ENST00000665585;ENST00000470094;ENST00000544455;ENST00000614259;ENST00000670614	BRCA2 DNA repair associated [Source:HGNC Symbol;Acc:HGNC:1101]	protein_coding;nonsense_mediated_decay;retained_intron;processed_transcript	0.463524	-1.10928	2.26498e-06	down
ENSG00000144354	CDCA7	ENST00000496441;ENST00000347703;ENST00000306721;ENST00000410019;ENST00000410101;ENST00000435616;ENST00000467411;ENST00000468359	cell division cycle associated 7 [Source:HGNC Symbol;Acc:HGNC:14628]	retained_intron;protein_coding;nonsense_mediated_decay	0.46362	-1.10898	5.81236e-06	down
ENSG00000099901	RANBP1	ENST00000486575;ENST00000402752;ENST00000418705;ENST00000430524;ENST00000411892;ENST00000488484;ENST00000331821;ENST00000448394;ENST00000467920;ENST00000421656;ENST00000432879;ENST00000435265;ENST00000423859;ENST00000416427	RAN binding protein 1 [Source:HGNC Symbol;Acc:HGNC:9847]	retained_intron;protein_coding;processed_transcript;nonsense_mediated_decay	0.463741	-1.10861	1.8429e-09	down
ENSG00000184564	SLITRK6	ENST00000647374;ENST00000645642;ENST00000643778	SLIT and NTRK like family member 6 [Source:HGNC Symbol;Acc:HGNC:23503]	protein_coding;processed_transcript	0.464058	-1.10762	0.0244532	down
ENSG00000148834	GSTO1	ENST00000369713;ENST00000445155;ENST00000493946;ENST00000369710;ENST00000539281;ENST00000470554;ENST00000432659	glutathione S-transferase omega 1 [Source:HGNC Symbol;Acc:HGNC:13312]	protein_coding;processed_transcript	0.464139	-1.10737	0.000113402	down
ENSG00000196361	ELAVL3	ENST00000359227;ENST00000438662;ENST00000592218;ENST00000588853	ELAV like RNA binding protein 3 [Source:HGNC Symbol;Acc:HGNC:3314]	protein_coding;processed_transcript	0.46526	-1.10389	2.25863e-07	down
ENSG00000139083	ETV6	ENST00000396373;ENST00000545027;ENST00000544715;ENST00000541426;ENST00000266427	ETS variant transcription factor 6 [Source:HGNC Symbol;Acc:HGNC:3495]	protein_coding;processed_transcript	0.465285	-1.10381	5.25597e-05	down
ENSG00000103723	AP3B2	ENST00000535359;ENST00000652847;ENST00000542200;ENST00000535513;ENST00000661532;ENST00000668458;ENST00000535348;ENST00000535385;ENST00000664460;ENST00000543938;ENST00000669880;ENST00000541693;ENST00000261722;ENST00000666672;ENST00000666973;ENST00000669930;ENST00000663651;ENST00000560529;ENST00000660624;ENST00000657321;ENST00000665513;ENST00000667758;ENST00000668990;ENST00000561455;ENST00000642989…	adaptor related protein complex 3 subunit beta 2 [Source:HGNC Symbol;Acc:HGNC:567]	protein_coding;nonsense_mediated_decay;retained_intron;processed_transcript	0.465584	-1.10289	2.30814e-06	down
ENSG00000109133	TMEM33	ENST00000325094;ENST00000504986;ENST00000513702;ENST00000506794;ENST00000508448;ENST00000264452;ENST00000513558;ENST00000510383	transmembrane protein 33 [Source:HGNC Symbol;Acc:HGNC:25541]	protein_coding;nonsense_mediated_decay;retained_intron	0.466491	-1.10008	0.000872057	down
ENSG00000118898	PPL	ENST00000345988;ENST00000588556;ENST00000589090;ENST00000592772;ENST00000590782;ENST00000590093	periplakin [Source:HGNC Symbol;Acc:HGNC:9273]	protein_coding;retained_intron	0.466554	-1.09989	8.11272e-10	down
ENSG00000106617	PRKAG2	ENST00000287878;ENST00000492843;ENST00000418337;ENST00000650664;ENST00000650948;ENST00000651836;ENST00000651954;ENST00000652321;ENST00000481434;ENST00000650858;ENST00000652707;ENST00000652714;ENST00000461529;ENST00000474383;ENST00000488258;ENST00000652159;ENST00000392801;ENST00000487375;ENST00000491938;ENST00000652572;ENST00000483775;ENST00000652136;ENST00000479461;ENST00000651303;ENST00000485183…	protein kinase AMP-activated non-catalytic subunit gamma 2 [Source:HGNC Symbol;Acc:HGNC:9386]	protein_coding;retained_intron;nonsense_mediated_decay;processed_transcript	0.467179	-1.09795	1.37228e-06	down
ENSG00000160097	FNDC5	ENST00000481487;ENST00000496770;ENST00000373471;ENST00000649537;ENST00000483143;ENST00000497068;ENST00000465346	fibronectin type III domain containing 5 [Source:HGNC Symbol;Acc:HGNC:20240]	processed_transcript;protein_coding	0.467509	-1.09693	3.37302e-07	down
ENSG00000149658	YTHDF1	ENST00000370339;ENST00000370334	YTH N6-methyladenosine RNA binding protein 1 [Source:HGNC Symbol;Acc:HGNC:15867]	protein_coding	0.467789	-1.09607	7.4909e-11	down
ENSG00000173404	INSM1	ENST00000310227	INSM transcriptional repressor 1 [Source:HGNC Symbol;Acc:HGNC:6090]	protein_coding	0.467909	-1.0957	2.80414e-07	down
ENSG00000156587	UBE2L6	ENST00000287156;ENST00000340573;ENST00000526659;ENST00000527022;ENST00000528275	ubiquitin conjugating enzyme E2 L6 [Source:HGNC Symbol;Acc:HGNC:12490]	protein_coding;retained_intron	0.468078	-1.09518	1.71048e-08	down
ENSG00000162931	TRIM17	ENST00000366698;ENST00000366697;ENST00000456946;ENST00000295033;ENST00000457345;ENST00000479800;ENST00000520264;ENST00000355586	tripartite motif containing 17 [Source:HGNC Symbol;Acc:HGNC:13430]	protein_coding	0.468097	-1.09512	0.010154	down
ENSG00000205592	MUC19	ENST00000454784;ENST00000546043;ENST00000423284;ENST00000541039;ENST00000484665;ENST00000543564;ENST00000675969;ENST00000427572;ENST00000474954;ENST00000676020;ENST00000398702;ENST00000492952;ENST00000424466	mucin 19, oligomeric [Source:HGNC Symbol;Acc:HGNC:14362]	processed_transcript;retained_intron;protein_coding	0.468451	-1.09403	0.00489369	down
ENSG00000102218	RP2	ENST00000218340	RP2 activator of ARL3 GTPase [Source:HGNC Symbol;Acc:HGNC:10274]	protein_coding	0.469597	-1.09051	5.85439e-08	down
ENSG00000100364	KIAA0930	ENST00000488038;ENST00000336156;ENST00000498418;ENST00000492273;ENST00000424508;ENST00000391627;ENST00000417906;ENST00000440039;ENST00000423262;ENST00000474515;ENST00000493003;ENST00000496226;ENST00000483374;ENST00000414854;ENST00000486640;ENST00000251993	KIAA0930 [Source:HGNC Symbol;Acc:HGNC:1314]	retained_intron;protein_coding;nonsense_mediated_decay;processed_transcript	0.470245	-1.08852	1.47414e-10	down
ENSG00000130222	GADD45G	ENST00000252506;ENST00000494726;ENST00000375769	growth arrest and DNA damage inducible gamma [Source:HGNC Symbol;Acc:HGNC:4097]	protein_coding;processed_transcript	0.470353	-1.08818	0.000642729	down
ENSG00000072182	ASIC4	ENST00000358078;ENST00000347842;ENST00000474489;ENST00000461395;ENST00000473709	acid sensing ion channel subunit family member 4 [Source:HGNC Symbol;Acc:HGNC:21263]	protein_coding;retained_intron;processed_transcript	0.470357	-1.08817	1.44981e-05	down
ENSG00000160439	RDH13	ENST00000396247;ENST00000586331;ENST00000587721;ENST00000610356;ENST00000593134;ENST00000587046;ENST00000291892;ENST00000591960;ENST00000589605;ENST00000592573;ENST00000591603;ENST00000587373;ENST00000589305;ENST00000591868;ENST00000588306;ENST00000588941;ENST00000591023;ENST00000589197;ENST00000587026;ENST00000592423;ENST00000586945;ENST00000590349;ENST00000415061	retinol dehydrogenase 13 [Source:HGNC Symbol;Acc:HGNC:19978]	protein_coding;processed_transcript;nonsense_mediated_decay	0.470634	-1.08732	0.00150051	down
ENSG00000125753	VASP	ENST00000245932;ENST00000588482;ENST00000590459;ENST00000588463;ENST00000589627;ENST00000588273;ENST00000586619;ENST00000587444;ENST00000590603;ENST00000592139;ENST00000586014	vasodilator stimulated phosphoprotein [Source:HGNC Symbol;Acc:HGNC:12652]	protein_coding;nonsense_mediated_decay;retained_intron;processed_transcript	0.47139	-1.08501	2.70125e-07	down
ENSG00000148154	UGCG	ENST00000374279;ENST00000489355;ENST00000495085;ENST00000490110;ENST00000474306	UDP-glucose ceramide glucosyltransferase [Source:HGNC Symbol;Acc:HGNC:12524]	protein_coding;processed_transcript	0.471849	-1.0836	1.7412e-09	down
ENSG00000127418	FGFRL1	ENST00000264748;ENST00000512174;ENST00000510644;ENST00000398484;ENST00000507339;ENST00000512562;ENST00000504138	fibroblast growth factor receptor like 1 [Source:HGNC Symbol;Acc:HGNC:3693]	protein_coding;processed_transcript	0.471935	-1.08334	1.31285e-05	down
ENSG00000049249	TNFRSF9	ENST00000377507;ENST00000474475;ENST00000492571;ENST00000674210;ENST00000615230	TNF receptor superfamily member 9 [Source:HGNC Symbol;Acc:HGNC:11924]	protein_coding;nonsense_mediated_decay	0.472023	-1.08307	0.00512138	down
ENSG00000075043	KCNQ2	ENST00000344425;ENST00000626839;ENST00000627221;ENST00000360480;ENST00000636591;ENST00000636065;ENST00000637656;ENST00000637193;ENST00000626684;ENST00000357249;ENST00000638073;ENST00000626717;ENST00000637063;ENST00000635867;ENST00000637133;ENST00000629676;ENST00000344462;ENST00000637639;ENST00000635864;ENST00000482957;ENST00000629498;ENST00000636042;ENST00000637772;ENST00000637890;ENST00000637704…	potassium voltage-gated channel subfamily Q member 2 [Source:HGNC Symbol;Acc:HGNC:6296]	protein_coding;processed_transcript;retained_intron	0.472275	-1.0823	5.12297e-06	down
ENSG00000160888	IER2	ENST00000588173;ENST00000292433;ENST00000587885	immediate early response 2 [Source:HGNC Symbol;Acc:HGNC:28871]	protein_coding	0.47234	-1.0821	1.13264e-08	down
ENSG00000095370	SH2D3C	ENST00000629203;ENST00000420366;ENST00000468969;ENST00000464239;ENST00000429553;ENST00000414380;ENST00000373277;ENST00000471939;ENST00000314830;ENST00000484160;ENST00000488685;ENST00000373276;ENST00000440630	SH2 domain containing 3C [Source:HGNC Symbol;Acc:HGNC:16884]	protein_coding;processed_transcript	0.472425	-1.08184	0.000232581	down
ENSG00000144191	CNGA3	ENST00000272602;ENST00000436404;ENST00000393503;ENST00000409937	cyclic nucleotide gated channel subunit alpha 3 [Source:HGNC Symbol;Acc:HGNC:2150]	protein_coding;retained_intron;processed_transcript	0.472453	-1.08176	0.00867583	down
ENSG00000185477	GPRIN3	ENST00000609438;ENST00000333209	GPRIN family member 3 [Source:HGNC Symbol;Acc:HGNC:27733]	protein_coding	0.473432	-1.07877	0.000327566	down
ENSG00000110395	CBL	ENST00000637974;ENST00000264033;ENST00000634301;ENST00000634840;ENST00000634586	Cbl proto-oncogene [Source:HGNC Symbol;Acc:HGNC:1541]	protein_coding	0.473553	-1.0784	0.0256239	down
ENSG00000100139	MICALL1	ENST00000215957;ENST00000454685;ENST00000424008;ENST00000445494;ENST00000489812;ENST00000402631	MICAL like 1 [Source:HGNC Symbol;Acc:HGNC:29804]	protein_coding;processed_transcript	0.474021	-1.07698	6.14807e-06	down
ENSG00000197948	FCHSD1	ENST00000518499;ENST00000523856;ENST00000520747;ENST00000519800;ENST00000435817;ENST00000522783;ENST00000522386;ENST00000522763;ENST00000522126;ENST00000518160	FCH and double SH3 domains 1 [Source:HGNC Symbol;Acc:HGNC:25463]	protein_coding;processed_transcript;retained_intron;nonsense_mediated_decay	0.474304	-1.07611	4.73946e-05	down
ENSG00000105357	MYH14	ENST00000596571;ENST00000262269;ENST00000376970;ENST00000595016;ENST00000642316;ENST00000425460;ENST00000597072;ENST00000646861;ENST00000642980;ENST00000598205;ENST00000440075;ENST00000599920	myosin heavy chain 14 [Source:HGNC Symbol;Acc:HGNC:23212]	protein_coding;retained_intron;nonsense_mediated_decay	0.474598	-1.07522	2.95587e-08	down
ENSG00000102309	PIN4	ENST00000652108;ENST00000373669;ENST00000373662;ENST00000664196;ENST00000218432;ENST00000496835;ENST00000423432;ENST00000446576;ENST00000439980	peptidylprolyl cis/trans isomerase, NIMA-interacting 4 [Source:HGNC Symbol;Acc:HGNC:8992]	protein_coding;nonsense_mediated_decay	0.474942	-1.07418	1.20794e-07	down
ENSG00000130589	HELZ2	ENST00000427522;ENST00000467148;ENST00000478861;ENST00000454223;ENST00000370082;ENST00000479540	helicase with zinc finger 2 [Source:HGNC Symbol;Acc:HGNC:30021]	protein_coding;processed_transcript;retained_intron	0.475108	-1.07367	4.91565e-06	down
ENSG00000196498	NCOR2	ENST00000443451;ENST00000461081;ENST00000420698;ENST00000405201;ENST00000429285;ENST00000404121;ENST00000356219;ENST00000458234;ENST00000404621;ENST00000413172;ENST00000473999;ENST00000440187;ENST00000464377;ENST00000440337;ENST00000542927;ENST00000536195;ENST00000474079;ENST00000418829;ENST00000493859;ENST00000453428;ENST00000448614;ENST00000494460;ENST00000542565;ENST00000448008	nuclear receptor corepressor 2 [Source:HGNC Symbol;Acc:HGNC:7673]	retained_intron;protein_coding	0.475187	-1.07343	2.67015e-10	down
ENSG00000176658	MYO1D	ENST00000579584;ENST00000318217;ENST00000577576;ENST00000577252;ENST00000623444;ENST00000581059;ENST00000577352;ENST00000582217;ENST00000585094;ENST00000583611;ENST00000582751;ENST00000584232;ENST00000580547;ENST00000583621;ENST00000580538;ENST00000394649	myosin ID [Source:HGNC Symbol;Acc:HGNC:7598]	protein_coding;processed_transcript;nonsense_mediated_decay;TEC;retained_intron	0.476125	-1.07059	2.43245e-08	down
ENSG00000066322	ELOVL1	ENST00000470769;ENST00000621943;ENST00000496932;ENST00000372458;ENST00000479686;ENST00000470968;ENST00000497050;ENST00000478481;ENST00000413844;ENST00000468865;ENST00000464204;ENST00000487209;ENST00000482302;ENST00000465321;ENST00000479439;ENST00000497569	ELOVL fatty acid elongase 1 [Source:HGNC Symbol;Acc:HGNC:14418]	processed_transcript;protein_coding	0.476519	-1.0694	9.45967e-07	down
ENSG00000163697	APBB2	ENST00000502841;ENST00000508593;ENST00000504484;ENST00000509475;ENST00000513140;ENST00000506352;ENST00000295974;ENST00000513611;ENST00000543538;ENST00000508707;ENST00000503555;ENST00000505266;ENST00000503503;ENST00000512510;ENST00000510925;ENST00000514094;ENST00000513516;ENST00000502687;ENST00000506999;ENST00000503264;ENST00000513493;ENST00000511120;ENST00000509446;ENST00000514920;ENST00000507831…	amyloid beta precursor protein binding family B member 2 [Source:HGNC Symbol;Acc:HGNC:582]	protein_coding;retained_intron;processed_transcript;nonsense_mediated_decay	0.477016	-1.06789	6.88289e-10	down
ENSG00000197275	RAD54B	ENST00000336148;ENST00000297592;ENST00000518998;ENST00000519348;ENST00000523192;ENST00000523839;ENST00000463267;ENST00000518358	RAD54 homolog B [Source:HGNC Symbol;Acc:HGNC:17228]	protein_coding;nonsense_mediated_decay;processed_transcript;retained_intron	0.477929	-1.06513	0.000201149	down
ENSG00000158201	ABHD3	ENST00000578270;ENST00000289119;ENST00000577564;ENST00000584464;ENST00000577891;ENST00000577928;ENST00000579875;ENST00000580477;ENST00000580981;ENST00000579982	abhydrolase domain containing 3, phospholipase [Source:HGNC Symbol;Acc:HGNC:18718]	protein_coding;retained_intron;nonsense_mediated_decay;processed_transcript	0.477997	-1.06493	0.00156427	down
ENSG00000134508	CABLES1	ENST00000256925;ENST00000578052;ENST00000582882;ENST00000580153;ENST00000580644;ENST00000585061;ENST00000420687;ENST00000583220;ENST00000400473;ENST00000579963	Cdk5 and Abl enzyme substrate 1 [Source:HGNC Symbol;Acc:HGNC:25097]	protein_coding;retained_intron;processed_transcript;nonsense_mediated_decay	0.478074	-1.0647	0.00014445	down
ENSG00000127863	TNFRSF19	ENST00000382263;ENST00000248484;ENST00000403372;ENST00000464735;ENST00000382258	TNF receptor superfamily member 19 [Source:HGNC Symbol;Acc:HGNC:11915]	protein_coding;processed_transcript	0.478551	-1.06326	4.68454e-09	down
ENSG00000170921	TANC2	ENST00000424789;ENST00000580466;ENST00000583356;ENST00000583545;ENST00000580068;ENST00000389520;ENST00000581424;ENST00000579541;ENST00000581143;ENST00000583016	tetratricopeptide repeat, ankyrin repeat and coiled-coil containing 2 [Source:HGNC Symbol;Acc:HGNC:30212]	protein_coding;retained_intron	0.47881	-1.06247	0.000530227	down
ENSG00000151967	SCHIP1	ENST00000482804;ENST00000461058;ENST00000482885;ENST00000445224;ENST00000495954;ENST00000472483;ENST00000483730;ENST00000475932	schwannomin interacting protein 1 [Source:HGNC Symbol;Acc:HGNC:15678]	protein_coding;retained_intron;nonsense_mediated_decay;processed_transcript	0.478846	-1.06237	0.000226761	down
ENSG00000169918	OTUD7A	ENST00000307050;ENST00000558371;ENST00000560598;ENST00000560536	OTU deubiquitinase 7A [Source:HGNC Symbol;Acc:HGNC:20718]	protein_coding;retained_intron;nonsense_mediated_decay	0.47937	-1.06079	0.00109233	down
ENSG00000167900	TK1	ENST00000588734;ENST00000301634;ENST00000592126;ENST00000590430;ENST00000590862;ENST00000586613	thymidine kinase 1 [Source:HGNC Symbol;Acc:HGNC:11830]	protein_coding;retained_intron	0.47965	-1.05995	5.26843e-06	down
ENSG00000070010	UFD1	ENST00000263202;ENST00000459854;ENST00000447868;ENST00000474226;ENST00000466373;ENST00000489406;ENST00000494054;ENST00000421968;ENST00000484101;ENST00000399523	ubiquitin recognition factor in ER associated degradation 1 [Source:HGNC Symbol;Acc:HGNC:12520]	protein_coding;retained_intron;processed_transcript	0.479673	-1.05988	8.1998e-08	down
ENSG00000197256	KANK2	ENST00000586659;ENST00000589359;ENST00000589427;ENST00000590400;ENST00000592675;ENST00000590095;ENST00000592903;ENST00000588787;ENST00000592215;ENST00000590685;ENST00000587317;ENST00000588724;ENST00000589894	KN motif and ankyrin repeat domains 2 [Source:HGNC Symbol;Acc:HGNC:29300]	protein_coding;retained_intron;processed_transcript	0.480019	-1.05884	2.17858e-06	down
ENSG00000119547	ONECUT2	ENST00000491143;ENST00000481727	one cut homeobox 2 [Source:HGNC Symbol;Acc:HGNC:8139]	protein_coding;processed_transcript	0.48023	-1.0582	7.81166e-06	down
ENSG00000135596	MICAL1	ENST00000358577;ENST00000465904;ENST00000456101;ENST00000483856;ENST00000358807;ENST00000431946;ENST00000630715;ENST00000433205	microtubule associated monooxygenase, calponin and LIM domain containing 1 [Source:HGNC Symbol;Acc:HGNC:20619]	protein_coding;retained_intron;processed_transcript	0.480377	-1.05776	3.01358e-10	down
ENSG00000073417	PDE8A	ENST00000557957;ENST00000394553;ENST00000561024;ENST00000561105;ENST00000559086;ENST00000557954;ENST00000561374;ENST00000310298;ENST00000339708;ENST00000559742;ENST00000558543;ENST00000485596;ENST00000560789;ENST00000557819;ENST00000560333;ENST00000478717	phosphodiesterase 8A [Source:HGNC Symbol;Acc:HGNC:8793]	protein_coding;retained_intron;nonsense_mediated_decay;processed_transcript	0.480728	-1.05671	0.0105149	down
ENSG00000188760	TMEM198	ENST00000373883;ENST00000344458;ENST00000421791;ENST00000451952	transmembrane protein 198 [Source:HGNC Symbol;Acc:HGNC:33704]	protein_coding	0.480971	-1.05598	0.00011205	down
ENSG00000167191	GPRC5B	ENST00000300571;ENST00000562348;ENST00000570142;ENST00000569102;ENST00000569479;ENST00000568214;ENST00000564449;ENST00000569847;ENST00000566822;ENST00000535671;ENST00000562469	G protein-coupled receptor class C group 5 member B [Source:HGNC Symbol;Acc:HGNC:13308]	protein_coding;retained_intron;processed_transcript	0.481077	-1.05566	1.63096e-09	down
ENSG00000101665	SMAD7	ENST00000545051;ENST00000262158;ENST00000587336;ENST00000585986;ENST00000589634;ENST00000591805;ENST00000586093;ENST00000588190	SMAD family member 7 [Source:HGNC Symbol;Acc:HGNC:6773]	retained_intron;protein_coding;processed_transcript	0.481156	-1.05542	0.000552944	down
ENSG00000164086	DUSP7	ENST00000495880;ENST00000469623	dual specificity phosphatase 7 [Source:HGNC Symbol;Acc:HGNC:3073]	protein_coding	0.482357	-1.05183	0.000210221	down
ENSG00000100344	PNPLA3	ENST00000216180;ENST00000406117;ENST00000423180;ENST00000497129;ENST00000478713	patatin like phospholipase domain containing 3 [Source:HGNC Symbol;Acc:HGNC:18590]	protein_coding;nonsense_mediated_decay;processed_transcript	0.482549	-1.05125	0.0134304	down
ENSG00000166862	CACNG2	ENST00000300105;ENST00000480002	calcium voltage-gated channel auxiliary subunit gamma 2 [Source:HGNC Symbol;Acc:HGNC:1406]	protein_coding;processed_transcript	0.483019	-1.04985	0.014323	down
ENSG00000183378	OVCH2	ENST00000673880;ENST00000534817;ENST00000612000;ENST00000533663	ovochymase 2 (gene/pseudogene) [Source:HGNC Symbol;Acc:HGNC:29970]	protein_coding;processed_transcript	0.483209	-1.04928	0.0457786	down
ENSG00000067191	CACNB1	ENST00000394303;ENST00000622445;ENST00000539338;ENST00000394310;ENST00000492737;ENST00000582877;ENST00000536613;ENST00000582414;ENST00000344140;ENST00000577582;ENST00000582544;ENST00000577926	calcium voltage-gated channel auxiliary subunit beta 1 [Source:HGNC Symbol;Acc:HGNC:1401]	protein_coding;retained_intron;processed_transcript	0.483298	-1.04901	2.62402e-05	down
ENSG00000198369	SPRED2	ENST00000356388;ENST00000421087;ENST00000474228;ENST00000426832;ENST00000443619;ENST00000440972;ENST00000452315;ENST00000427238	sprouty related EVH1 domain containing 2 [Source:HGNC Symbol;Acc:HGNC:17722]	protein_coding;processed_transcript;nonsense_mediated_decay	0.48348	-1.04847	6.15942e-06	down
ENSG00000135828	RNASEL	ENST00000367559;ENST00000539397	ribonuclease L [Source:HGNC Symbol;Acc:HGNC:10050]	protein_coding	0.483973	-1.047	0.000204589	down
ENSG00000070371	CLTCL1	ENST00000412649;ENST00000427926;ENST00000621271;ENST00000615606;ENST00000458188;ENST00000617926;ENST00000617103;ENST00000611723;ENST00000540896;ENST00000622493;ENST00000538828;ENST00000449918	clathrin heavy chain like 1 [Source:HGNC Symbol;Acc:HGNC:2093]	retained_intron;protein_coding;nonsense_mediated_decay	0.484014	-1.04688	0.00112044	down
ENSG00000166979	EVA1C	ENST00000300255;ENST00000464037;ENST00000412833;ENST00000457807;ENST00000437338;ENST00000485488;ENST00000435323;ENST00000496615;ENST00000481638;ENST00000401402;ENST00000469079;ENST00000459833;ENST00000382699	eva-1 homolog C [Source:HGNC Symbol;Acc:HGNC:13239]	protein_coding;retained_intron;nonsense_mediated_decay;processed_transcript	0.484144	-1.04649	0.0259735	down
ENSG00000100292	HMOX1	ENST00000216117;ENST00000481190;ENST00000412893;ENST00000494998	heme oxygenase 1 [Source:HGNC Symbol;Acc:HGNC:5013]	protein_coding;retained_intron	0.484444	-1.0456	7.53337e-05	down
ENSG00000151320	AKAP6	ENST00000280979;ENST00000554449;ENST00000554740;ENST00000557102;ENST00000557396;ENST00000557272;ENST00000555207;ENST00000556540;ENST00000556638;ENST00000553547;ENST00000557708;ENST00000555950;ENST00000557354;ENST00000554410;ENST00000556037	A-kinase anchoring protein 6 [Source:HGNC Symbol;Acc:HGNC:376]	protein_coding;processed_transcript;retained_intron	0.485216	-1.0433	1.49768e-08	down
ENSG00000123975	CKS2	ENST00000314355	CDC28 protein kinase regulatory subunit 2 [Source:HGNC Symbol;Acc:HGNC:2000]	protein_coding	0.485485	-1.0425	2.1818e-08	down
ENSG00000219545	UMAD1	ENST00000639343;ENST00000639110;ENST00000406829;ENST00000636849;ENST00000493246;ENST00000471760;ENST00000482067;ENST00000463725;ENST00000638342	UBAP1-MVB12-associated (UMA) domain containing 1 [Source:HGNC Symbol;Acc:HGNC:48955]	nonsense_mediated_decay;processed_transcript;protein_coding	0.485743	-1.04173	0.0308177	down
ENSG00000171295	ZNF440	ENST00000304060;ENST00000414255;ENST00000588954;ENST00000457526;ENST00000427505;ENST00000587795	zinc finger protein 440 [Source:HGNC Symbol;Acc:HGNC:20874]	protein_coding;retained_intron	0.485787	-1.0416	0.00252746	down
ENSG00000261052	SULT1A3	ENST00000338971;ENST00000562257;ENST00000567309;ENST00000561549;ENST00000569409;ENST00000561533;ENST00000563638;ENST00000395138;ENST00000563322;ENST00000569485	sulfotransferase family 1A member 3 [Source:HGNC Symbol;Acc:HGNC:11455]	protein_coding;retained_intron;nonsense_mediated_decay	0.485791	-1.04159	0.0349716	down
ENSG00000138119	MYOF	ENST00000359263;ENST00000358334;ENST00000463743;ENST00000371489;ENST00000485212;ENST00000488645;ENST00000474161;ENST00000475358;ENST00000371488	myoferlin [Source:HGNC Symbol;Acc:HGNC:3656]	protein_coding;nonsense_mediated_decay;processed_transcript;retained_intron	0.485917	-1.04122	7.99506e-10	down
ENSG00000102003	SYP	ENST00000479808;ENST00000263233;ENST00000376303;ENST00000472737;ENST00000472598;ENST00000466635;ENST00000494396;ENST00000469389	synaptophysin [Source:HGNC Symbol;Acc:HGNC:11506]	protein_coding;nonsense_mediated_decay;retained_intron	0.485971	-1.04106	1.03048e-06	down
ENSG00000166401	SERPINB8	ENST00000397985;ENST00000353706;ENST00000542677;ENST00000295211;ENST00000397988;ENST00000448851;ENST00000493661;ENST00000441827;ENST00000636430	serpin family B member 8 [Source:HGNC Symbol;Acc:HGNC:8952]	protein_coding	0.486217	-1.04033	0.0131912	down
ENSG00000197093	GAL3ST4	ENST00000495882;ENST00000413800;ENST00000360039;ENST00000482469;ENST00000460995;ENST00000423751;ENST00000411994;ENST00000498000	galactose-3-O-sulfotransferase 4 [Source:HGNC Symbol;Acc:HGNC:24145]	retained_intron;protein_coding	0.486411	-1.03975	0.00232232	down
ENSG00000119669	IRF2BPL	ENST00000238647	interferon regulatory factor 2 binding protein like [Source:HGNC Symbol;Acc:HGNC:14282]	protein_coding	0.486426	-1.03971	4.86414e-08	down
ENSG00000122733	PHF24	ENST00000242315;ENST00000476115;ENST00000486477;ENST00000440503	PHD finger protein 24 [Source:HGNC Symbol;Acc:HGNC:29180]	protein_coding;processed_transcript	0.486823	-1.03853	0.00407002	down
ENSG00000171813	PWWP2B	ENST00000305233;ENST00000631148	PWWP domain containing 2B [Source:HGNC Symbol;Acc:HGNC:25150]	protein_coding	0.486829	-1.03851	7.86273e-05	down
ENSG00000197299	BLM	ENST00000355112;ENST00000558825;ENST00000560509;ENST00000648453;ENST00000560136;ENST00000559426;ENST00000560559;ENST00000560821;ENST00000559282;ENST00000558599;ENST00000559724	BLM RecQ like helicase [Source:HGNC Symbol;Acc:HGNC:1058]	protein_coding;retained_intron;nonsense_mediated_decay;processed_transcript	0.487165	-1.03752	4.90008e-06	down
ENSG00000167995	BEST1	ENST00000449131;ENST00000524877;ENST00000378043;ENST00000534553;ENST00000524926;ENST00000526988;ENST00000533521;ENST00000529265	bestrophin 1 [Source:HGNC Symbol;Acc:HGNC:12703]	protein_coding;retained_intron;nonsense_mediated_decay	0.487247	-1.03727	0.00905678	down
ENSG00000124766	SOX4	ENST00000244745	SRY-box transcription factor 4 [Source:HGNC Symbol;Acc:HGNC:11200]	protein_coding	0.487449	-1.03668	1.39957e-10	down
ENSG00000102466	FGF14	ENST00000376131;ENST00000418923;ENST00000376143;ENST00000468052	fibroblast growth factor 14 [Source:HGNC Symbol;Acc:HGNC:3671]	protein_coding;processed_transcript	0.487665	-1.03604	0.0201762	down
ENSG00000005020	SKAP2	ENST00000345317;ENST00000495802;ENST00000489977;ENST00000432747;ENST00000490456;ENST00000487720;ENST00000481204;ENST00000468712;ENST00000497511	src kinase associated phosphoprotein 2 [Source:HGNC Symbol;Acc:HGNC:15687]	protein_coding;processed_transcript;retained_intron	0.487811	-1.03561	0.0390045	down
ENSG00000159023	EPB41	ENST00000645999;ENST00000646871;ENST00000349460;ENST00000642937;ENST00000644780;ENST00000373800;ENST00000460378;ENST00000373797;ENST00000490308;ENST00000645184;ENST00000647918;ENST00000647103;ENST00000648181;ENST00000649674;ENST00000650265;ENST00000643173;ENST00000644470;ENST00000642260;ENST00000356093;ENST00000642643;ENST00000649717;ENST00000643302;ENST00000373798;ENST00000646260;ENST00000644600…	erythrocyte membrane protein band 4.1 [Source:HGNC Symbol;Acc:HGNC:3377]	retained_intron;protein_coding;processed_transcript;nonsense_mediated_decay	0.487878	-1.03541	4.02885e-09	down
ENSG00000064225	ST3GAL6	ENST00000469105;ENST00000483910;ENST00000394162;ENST00000474595;ENST00000477574;ENST00000485145;ENST00000489112;ENST00000476833;ENST00000460774;ENST00000265261;ENST00000491912;ENST00000485391;ENST00000468553;ENST00000497008;ENST00000477899;ENST00000480133;ENST00000486334;ENST00000486249;ENST00000497621;ENST00000495502;ENST00000490684;ENST00000613264;ENST00000462152;ENST00000465004;ENST00000492254…	ST3 beta-galactoside alpha-2,3-sialyltransferase 6 [Source:HGNC Symbol;Acc:HGNC:18080]	nonsense_mediated_decay;protein_coding;processed_transcript;retained_intron	0.488115	-1.03471	0.00848866	down
ENSG00000172071	EIF2AK3	ENST00000652099;ENST00000303236;ENST00000478003;ENST00000470706;ENST00000652666;ENST00000415570;ENST00000652736;ENST00000652423	eukaryotic translation initiation factor 2 alpha kinase 3 [Source:HGNC Symbol;Acc:HGNC:3255]	nonsense_mediated_decay;protein_coding;retained_intron;processed_transcript	0.488131	-1.03466	1.69834e-07	down
ENSG00000076554	TPD52	ENST00000518937;ENST00000448733;ENST00000379096;ENST00000520035;ENST00000517445;ENST00000521618;ENST00000520877;ENST00000522364;ENST00000520741;ENST00000379097;ENST00000523319;ENST00000521561;ENST00000518517;ENST00000602950;ENST00000523395;ENST00000517427;ENST00000521241;ENST00000523193;ENST00000519250;ENST00000523753;ENST00000517462;ENST00000523783;ENST00000524194;ENST00000519303;ENST00000520527…	tumor protein D52 [Source:HGNC Symbol;Acc:HGNC:12005]	protein_coding;processed_transcript;retained_intron;nonsense_mediated_decay	0.488626	-1.0332	0.000422516	down
ENSG00000206053	JPT2	ENST00000569765;ENST00000248098;ENST00000562684;ENST00000382710;ENST00000562569;ENST00000568376;ENST00000566742;ENST00000561516;ENST00000566691;ENST00000566925;ENST00000567717;ENST00000565851;ENST00000382711;ENST00000569256	Jupiter microtubule associated homolog 2 [Source:HGNC Symbol;Acc:HGNC:14137]	protein_coding;processed_transcript;nonsense_mediated_decay;retained_intron	0.488942	-1.03226	1.83616e-05	down
ENSG00000146352	CLVS2	ENST00000275162;ENST00000368438	clavesin 2 [Source:HGNC Symbol;Acc:HGNC:23046]	protein_coding	0.489409	-1.03089	0.000766029	down
ENSG00000118640	VAMP8	ENST00000263864;ENST00000432071;ENST00000409760	vesicle associated membrane protein 8 [Source:HGNC Symbol;Acc:HGNC:12647]	protein_coding	0.489471	-1.03071	8.8092e-06	down
ENSG00000250120	PCDHA10	ENST00000562220;ENST00000307360;ENST00000673459;ENST00000506939	protocadherin alpha 10 [Source:HGNC Symbol;Acc:HGNC:8664]	protein_coding	0.489512	-1.03058	0.0211763	down
ENSG00000174521	TTC9B	ENST00000311308;ENST00000593586	tetratricopeptide repeat domain 9B [Source:HGNC Symbol;Acc:HGNC:26395]	protein_coding;retained_intron	0.489934	-1.02934	0.00524078	down
ENSG00000163931	TKT	ENST00000423525;ENST00000466765;ENST00000460343;ENST00000487660;ENST00000462138;ENST00000461139;ENST00000423516;ENST00000494523;ENST00000483706;ENST00000472528;ENST00000469678;ENST00000450814;ENST00000296289;ENST00000460243	transketolase [Source:HGNC Symbol;Acc:HGNC:11834]	protein_coding;retained_intron;processed_transcript;nonsense_mediated_decay	0.490123	-1.02878	1.38693e-10	down
ENSG00000133069	TMCC2	ENST00000358024;ENST00000367159;ENST00000481950;ENST00000637895;ENST00000545499;ENST00000468846;ENST00000329800;ENST00000495538;ENST00000330675;ENST00000648708	transmembrane and coiled-coil domain family 2 [Source:HGNC Symbol;Acc:HGNC:24239]	protein_coding;processed_transcript	0.490451	-1.02782	1.21251e-06	down
ENSG00000167996	FTH1	ENST00000532829;ENST00000526640;ENST00000532601;ENST00000273550;ENST00000534719;ENST00000533138;ENST00000534180;ENST00000529631;ENST00000529191;ENST00000620041;ENST00000529548;ENST00000530019	ferritin heavy chain 1 [Source:HGNC Symbol;Acc:HGNC:3976]	nonsense_mediated_decay;protein_coding;retained_intron	0.490469	-1.02777	3.21933e-09	down
ENSG00000029993	HMGB3	ENST00000430118;ENST00000325307;ENST00000455596;ENST00000419110;ENST00000448905	high mobility group box 3 [Source:HGNC Symbol;Acc:HGNC:5004]	protein_coding	0.490602	-1.02738	3.03653e-10	down
ENSG00000126822	PLEKHG3	ENST00000484731;ENST00000247226;ENST00000490180;ENST00000471182;ENST00000554088;ENST00000394691;ENST00000556801;ENST00000555982;ENST00000554499;ENST00000492928;ENST00000634379	pleckstrin homology and RhoGEF domain containing G3 [Source:HGNC Symbol;Acc:HGNC:20364]	protein_coding;retained_intron;processed_transcript	0.490982	-1.02626	1.74115e-09	down
ENSG00000130287	NCAN	ENST00000252575;ENST00000590187;ENST00000585410;ENST00000588231	neurocan [Source:HGNC Symbol;Acc:HGNC:2465]	protein_coding;retained_intron	0.491039	-1.02609	2.46289e-06	down
ENSG00000139714	MORN3	ENST00000355329;ENST00000392462;ENST00000542364	MORN repeat containing 3 [Source:HGNC Symbol;Acc:HGNC:29807]	protein_coding;nonsense_mediated_decay	0.491196	-1.02563	0.0364578	down
ENSG00000100084	HIRA	ENST00000263208;ENST00000464189;ENST00000340170;ENST00000452818	histone cell cycle regulator [Source:HGNC Symbol;Acc:HGNC:4916]	protein_coding;processed_transcript;nonsense_mediated_decay	0.491838	-1.02375	1.99252e-08	down
ENSG00000126561	STAT5A	ENST00000345506;ENST00000444283;ENST00000591556;ENST00000468096;ENST00000546010;ENST00000587646;ENST00000588868;ENST00000479417;ENST00000478897;ENST00000469124;ENST00000590726;ENST00000590949	signal transducer and activator of transcription 5A [Source:HGNC Symbol;Acc:HGNC:11366]	protein_coding;retained_intron	0.493476	-1.01895	0.0291644	down
ENSG00000134490	TMEM241	ENST00000473688;ENST00000383233;ENST00000482411;ENST00000584625;ENST00000475185;ENST00000582336;ENST00000497608;ENST00000580025;ENST00000578520;ENST00000577448;ENST00000578790;ENST00000577531;ENST00000460322;ENST00000583048;ENST00000477053;ENST00000542162;ENST00000581444	transmembrane protein 241 [Source:HGNC Symbol;Acc:HGNC:31723]	nonsense_mediated_decay;protein_coding;processed_transcript;retained_intron	0.493602	-1.01858	0.000331486	down
ENSG00000159840	ZYX	ENST00000497119;ENST00000468083;ENST00000354434;ENST00000322764;ENST00000449630;ENST00000457235;ENST00000477373;ENST00000392910;ENST00000436448;ENST00000446634	zyxin [Source:HGNC Symbol;Acc:HGNC:13200]	retained_intron;protein_coding;processed_transcript;nonsense_mediated_decay	0.493639	-1.01847	2.75582e-09	down
ENSG00000178852	EFCAB13	ENST00000331493;ENST00000523842;ENST00000519772;ENST00000523978;ENST00000517484;ENST00000518081;ENST00000520776;ENST00000517310;ENST00000518646;ENST00000522326;ENST00000518170;ENST00000523285;ENST00000520802	EF-hand calcium binding domain 13 [Source:HGNC Symbol;Acc:HGNC:26864]	protein_coding;processed_transcript;retained_intron	0.493802	-1.01799	0.0424468	down
ENSG00000206579	XKR4	ENST00000327381;ENST00000518261;ENST00000622811	XK related 4 [Source:HGNC Symbol;Acc:HGNC:29394]	protein_coding;processed_transcript	0.495511	-1.01301	2.49451e-06	down
ENSG00000177191	B3GNT8	ENST00000321702;ENST00000601616;ENST00000601379	UDP-GlcNAc:betaGal beta-1,3-N-acetylglucosaminyltransferase 8 [Source:HGNC Symbol;Acc:HGNC:24139]	protein_coding;processed_transcript	0.495792	-1.01219	0.0146858	down
ENSG00000161638	ITGA5	ENST00000552564;ENST00000293379;ENST00000552387;ENST00000547744;ENST00000550141;ENST00000553071;ENST00000547197;ENST00000549601;ENST00000552583;ENST00000551861;ENST00000435631;ENST00000552431;ENST00000551564	integrin subunit alpha 5 [Source:HGNC Symbol;Acc:HGNC:6141]	retained_intron;protein_coding;processed_transcript;nonsense_mediated_decay	0.49587	-1.01197	2.80529e-09	down
ENSG00000162374	ELAVL4	ENST00000371821;ENST00000650764;ENST00000652693;ENST00000494555;ENST00000357083;ENST00000448907;ENST00000371823;ENST00000651347;ENST00000371824;ENST00000371819;ENST00000651258;ENST00000492299;ENST00000652353;ENST00000651693;ENST00000652252;ENST00000371827;ENST00000463650;ENST00000652274;ENST00000474675	ELAV like RNA binding protein 4 [Source:HGNC Symbol;Acc:HGNC:3315]	protein_coding;processed_transcript;nonsense_mediated_decay	0.496405	-1.01041	1.6097e-06	down
ENSG00000146648	EGFR	ENST00000275493;ENST00000420316;ENST00000454757;ENST00000342916;ENST00000455089;ENST00000344576;ENST00000459688;ENST00000485503;ENST00000450046;ENST00000463948	epidermal growth factor receptor [Source:HGNC Symbol;Acc:HGNC:3236]	protein_coding;processed_transcript;retained_intron	0.496466	-1.01023	1.16263e-08	down
ENSG00000137571	SLCO5A1	ENST00000260126;ENST00000530307;ENST00000531422;ENST00000524703;ENST00000528658;ENST00000532388;ENST00000524945;ENST00000526750	solute carrier organic anion transporter family member 5A1 [Source:HGNC Symbol;Acc:HGNC:19046]	protein_coding;processed_transcript;retained_intron;nonsense_mediated_decay	0.496499	-1.01014	0.0205993	down
ENSG00000145247	OCIAD2	ENST00000381464;ENST00000508632;ENST00000273860;ENST00000508069;ENST00000514576;ENST00000620187;ENST00000514155;ENST00000506226;ENST00000510159;ENST00000512087	OCIA domain containing 2 [Source:HGNC Symbol;Acc:HGNC:28685]	protein_coding;processed_transcript;retained_intron;nonsense_mediated_decay	0.496665	-1.00965	8.4961e-07	down
ENSG00000175066	GK5	ENST00000392993;ENST00000460515;ENST00000480757;ENST00000486459;ENST00000489085;ENST00000472759;ENST00000466685;ENST00000463349;ENST00000460544;ENST00000460630;ENST00000487672;ENST00000492097	glycerol kinase 5 [Source:HGNC Symbol;Acc:HGNC:28635]	protein_coding;retained_intron;nonsense_mediated_decay;processed_transcript	0.497047	-1.00855	0.000743307	down
ENSG00000163171	CDC42EP3	ENST00000295324;ENST00000457889;ENST00000494083;ENST00000422687;ENST00000611976;ENST00000453555	CDC42 effector protein 3 [Source:HGNC Symbol;Acc:HGNC:16943]	protein_coding;retained_intron	0.497363	-1.00763	5.21405e-08	down
ENSG00000163362	INAVA	ENST00000413687;ENST00000367342;ENST00000465162;ENST00000451872;ENST00000532631;ENST00000526172;ENST00000531649	innate immunity activator [Source:HGNC Symbol;Acc:HGNC:25599]	protein_coding;processed_transcript	0.497833	-1.00627	1.58831e-08	down
ENSG00000102057	KCND1	ENST00000218176;ENST00000419374;ENST00000376477	potassium voltage-gated channel subfamily D member 1 [Source:HGNC Symbol;Acc:HGNC:6237]	protein_coding	0.498185	-1.00525	0.000294379	down
ENSG00000102580	DNAJC3	ENST00000602402;ENST00000376795	DnaJ heat shock protein family (Hsp40) member C3 [Source:HGNC Symbol;Acc:HGNC:9439]	protein_coding	0.498355	-1.00475	1.51275e-07	down
ENSG00000172936	MYD88	ENST00000652213;ENST00000484513;ENST00000650905;ENST00000396334;ENST00000652590;ENST00000651800;ENST00000421516;ENST00000463956;ENST00000417037;ENST00000650112;ENST00000416282;ENST00000481122;ENST00000460295	MYD88 innate immune signal transduction adaptor [Source:HGNC Symbol;Acc:HGNC:7562]	protein_coding;retained_intron;processed_transcript	0.49872	-1.0037	2.3477e-06	down
ENSG00000176485	PLAAT3	ENST00000415826;ENST00000323646;ENST00000394613;ENST00000540943;ENST00000639271;ENST00000544269	phospholipase A and acyltransferase 3 [Source:HGNC Symbol;Acc:HGNC:17825]	protein_coding;processed_transcript	0.498826	-1.00339	2.53002e-06	down
ENSG00000099992	TBC1D10A	ENST00000215790;ENST00000467596;ENST00000462073;ENST00000393906;ENST00000433426;ENST00000490449;ENST00000403362;ENST00000437122;ENST00000403477;ENST00000466666	TBC1 domain family member 10A [Source:HGNC Symbol;Acc:HGNC:23609]	protein_coding;retained_intron;nonsense_mediated_decay;processed_transcript	0.498833	-1.00337	0.000140046	down
ENSG00000103067	ESRP2	ENST00000251366;ENST00000562567;ENST00000473183;ENST00000566774;ENST00000565858;ENST00000564465;ENST00000562724;ENST00000562738;ENST00000564382;ENST00000569964;ENST00000563159;ENST00000565213	epithelial splicing regulatory protein 2 [Source:HGNC Symbol;Acc:HGNC:26152]	retained_intron;protein_coding;nonsense_mediated_decay	0.49898	-1.00294	5.19431e-05	down
ENSG00000060138	YBX3	ENST00000228251;ENST00000279550;ENST00000540447;ENST00000536823;ENST00000546164;ENST00000540975;ENST00000542002;ENST00000366290;ENST00000542641;ENST00000366286;ENST00000544622;ENST00000536107;ENST00000544504;ENST00000546298;ENST00000544501;ENST00000539204;ENST00000541351;ENST00000540747	Y-box binding protein 3 [Source:HGNC Symbol;Acc:HGNC:2428]	protein_coding;retained_intron;processed_transcript	0.499104	-1.00259	5.99894e-08	down
ENSG00000188707	ZBED6CL	ENST00000343855;ENST00000463441	ZBED6 C-terminal like [Source:HGNC Symbol;Acc:HGNC:21720]	protein_coding;processed_transcript	0.499195	-1.00232	0.000690166	down
ENSG00000188021	UBQLN2	ENST00000338222	ubiquilin 2 [Source:HGNC Symbol;Acc:HGNC:12509]	protein_coding	0.499481	-1.0015	2.42263e-10	down
ENSG00000139209	SLC38A4	ENST00000266579;ENST00000447411;ENST00000550670;ENST00000546940;ENST00000547477	solute carrier family 38 member 4 [Source:HGNC Symbol;Acc:HGNC:14679]	protein_coding	0.499509	-1.00142	8.51508e-06	down
ENSG00000169783	LINGO1	ENST00000355300;ENST00000567605;ENST00000561030;ENST00000559893;ENST00000563316;ENST00000567726;ENST00000562933;ENST00000557798;ENST00000570216;ENST00000564472;ENST00000568951;ENST00000561686;ENST00000564066;ENST00000566711	leucine rich repeat and Ig domain containing 1 [Source:HGNC Symbol;Acc:HGNC:21205]	protein_coding;processed_transcript	0.500389	-0.998877	1.0095e-05	down
ENSG00000003249	DBNDD1	ENST00000623401;ENST00000568838;ENST00000392973;ENST00000002501;ENST00000568330;ENST00000568662;ENST00000304733	dysbindin domain containing 1 [Source:HGNC Symbol;Acc:HGNC:28455]	TEC;protein_coding;nonsense_mediated_decay	0.500442	-0.998725	4.02865e-05	down
ENSG00000143878	RHOB	ENST00000272233	ras homolog family member B [Source:HGNC Symbol;Acc:HGNC:668]	protein_coding	0.50056	-0.998385	4.80459e-10	down
ENSG00000237440	ZNF737	ENST00000427401;ENST00000594419;ENST00000596797;ENST00000596530;ENST00000597940	zinc finger protein 737 [Source:HGNC Symbol;Acc:HGNC:32468]	protein_coding;nonsense_mediated_decay	0.500695	-0.997997	0.0190626	down
ENSG00000211455	STK38L	ENST00000546286;ENST00000536093;ENST00000544969;ENST00000543992;ENST00000389032;ENST00000545470;ENST00000434385;ENST00000407753;ENST00000539863;ENST00000541191;ENST00000540996;ENST00000543246;ENST00000544367	serine/threonine kinase 38 like [Source:HGNC Symbol;Acc:HGNC:17848]	nonsense_mediated_decay;protein_coding;retained_intron	0.501589	-0.995422	4.00278e-05	down
ENSG00000145990	GFOD1	ENST00000379287;ENST00000612338;ENST00000379278;ENST00000603223;ENST00000605067;ENST00000379284	glucose-fructose oxidoreductase domain containing 1 [Source:HGNC Symbol;Acc:HGNC:21096]	protein_coding;processed_transcript	0.501717	-0.995053	0.00323996	down
ENSG00000139211	AMIGO2	ENST00000550413;ENST00000266581;ENST00000429635	adhesion molecule with Ig like domain 2 [Source:HGNC Symbol;Acc:HGNC:24073]	protein_coding	0.502115	-0.99391	0.000180703	down
ENSG00000144847	IGSF11	ENST00000489689;ENST00000491903;ENST00000393775;ENST00000441144;ENST00000483401;ENST00000480431;ENST00000354673;ENST00000494802;ENST00000459718;ENST00000425327	immunoglobulin superfamily member 11 [Source:HGNC Symbol;Acc:HGNC:16669]	protein_coding;processed_transcript	0.502525	-0.992732	0.00193025	down
ENSG00000071054	MAP4K4	ENST00000418101;ENST00000425019;ENST00000634702;ENST00000476609;ENST00000347699;ENST00000350878;ENST00000421882;ENST00000302217;ENST00000491743;ENST00000324219;ENST00000625522;ENST00000413150;ENST00000498066;ENST00000477711;ENST00000417294;ENST00000350198;ENST00000427603;ENST00000456652;ENST00000627726;ENST00000496989;ENST00000489490	mitogen-activated protein kinase kinase kinase kinase 4 [Source:HGNC Symbol;Acc:HGNC:6866]	protein_coding;retained_intron;processed_transcript	0.502804	-0.991933	4.1116e-09	down
ENSG00000120690	ELF1	ENST00000625359;ENST00000405737;ENST00000239882;ENST00000635415;ENST00000498824	E74 like ETS transcription factor 1 [Source:HGNC Symbol;Acc:HGNC:3316]	protein_coding;nonsense_mediated_decay	0.502941	-0.991539	2.9779e-06	down
ENSG00000101384	JAG1	ENST00000254958;ENST00000617965;ENST00000488480;ENST00000613518;ENST00000620743;ENST00000612857;ENST00000423891;ENST00000622545;ENST00000617357	jagged canonical Notch ligand 1 [Source:HGNC Symbol;Acc:HGNC:6188]	protein_coding;retained_intron;processed_transcript;nonsense_mediated_decay	0.502962	-0.991479	2.82038e-08	down
ENSG00000095066	HOOK2	ENST00000264827;ENST00000397668;ENST00000586188;ENST00000586710;ENST00000589965;ENST00000589400;ENST00000591641;ENST00000589915;ENST00000590839;ENST00000588052;ENST00000589765;ENST00000586719;ENST00000592079;ENST00000592512;ENST00000592259;ENST00000587964;ENST00000591251;ENST00000586284;ENST00000587178;ENST00000589134;ENST00000589398;ENST00000591839;ENST00000592808;ENST00000593143	hook microtubule tethering protein 2 [Source:HGNC Symbol;Acc:HGNC:19885]	protein_coding;nonsense_mediated_decay;retained_intron;processed_transcript	0.503168	-0.990887	0.000630042	down
ENSG00000102103	PQBP1	ENST00000247140;ENST00000447146;ENST00000376566;ENST00000473764;ENST00000651767;ENST00000477997;ENST00000470059;ENST00000463529;ENST00000465859;ENST00000218224;ENST00000472742;ENST00000443648;ENST00000456306;ENST00000470062;ENST00000396763;ENST00000486150;ENST00000474671;ENST00000376563	polyglutamine binding protein 1 [Source:HGNC Symbol;Acc:HGNC:9330]	protein_coding;processed_transcript	0.503599	-0.989653	8.33554e-06	down
ENSG00000171303	KCNK3	ENST00000302909;ENST00000620977	potassium two pore domain channel subfamily K member 3 [Source:HGNC Symbol;Acc:HGNC:6278]	protein_coding	0.50378	-0.989134	0.0026062	down
ENSG00000077150	NFKB2	ENST00000467116;ENST00000652277;ENST00000428099;ENST00000369966;ENST00000189444;ENST00000661543;ENST00000471698;ENST00000601386;ENST00000473400;ENST00000651907;ENST00000336486	nuclear factor kappa B subunit 2 [Source:HGNC Symbol;Acc:HGNC:7795]	retained_intron;protein_coding;processed_transcript	0.504295	-0.987659	2.28068e-07	down
ENSG00000073350	LLGL2	ENST00000545227;ENST00000579092;ENST00000167462;ENST00000392550;ENST00000577500;ENST00000577211;ENST00000375227;ENST00000578034;ENST00000583514;ENST00000578536;ENST00000577200;ENST00000578638;ENST00000581713;ENST00000582393;ENST00000580027;ENST00000583658;ENST00000578363;ENST00000580925;ENST00000582860;ENST00000579392;ENST00000580578;ENST00000578719	LLGL scribble cell polarity complex component 2 [Source:HGNC Symbol;Acc:HGNC:6629]	retained_intron;protein_coding;nonsense_mediated_decay	0.504572	-0.986868	2.33555e-06	down
ENSG00000068489	PRR11	ENST00000262293;ENST00000614081;ENST00000577457;ENST00000582995;ENST00000580177;ENST00000581182;ENST00000578777;ENST00000582004;ENST00000578542	proline rich 11 [Source:HGNC Symbol;Acc:HGNC:25619]	protein_coding;nonsense_mediated_decay;retained_intron	0.504757	-0.986338	9.01577e-06	down
ENSG00000157168	NRG1	ENST00000650967;ENST00000651696;ENST00000650819;ENST00000405005;ENST00000356819;ENST00000650980;ENST00000652698;ENST00000652592;ENST00000287842;ENST00000519301;ENST00000523681;ENST00000520407;ENST00000520502;ENST00000539990;ENST00000631040;ENST00000517967;ENST00000521670;ENST00000523041;ENST00000522569;ENST00000650919;ENST00000614767;ENST00000651335;ENST00000523534;ENST00000519240;ENST00000650856…	neuregulin 1 [Source:HGNC Symbol;Acc:HGNC:7997]	protein_coding;nonsense_mediated_decay;processed_transcript;retained_intron	0.504962	-0.985754	0.0100187	down
ENSG00000154511	DIPK1A	ENST00000370310;ENST00000613902;ENST00000616709;ENST00000613047;ENST00000615519	divergent protein kinase domain 1A [Source:HGNC Symbol;Acc:HGNC:32213]	protein_coding	0.505344	-0.984663	0.00120642	down
ENSG00000165675	ENOX2	ENST00000370935;ENST00000610637;ENST00000394363;ENST00000338144;ENST00000492263;ENST00000432489;ENST00000370927	ecto-NOX disulfide-thiol exchanger 2 [Source:HGNC Symbol;Acc:HGNC:2259]	protein_coding;processed_transcript	0.505364	-0.984606	4.21533e-07	down
ENSG00000112812	PRSS16	ENST00000485603;ENST00000481125;ENST00000466364;ENST00000471463;ENST00000421826;ENST00000485993;ENST00000454665;ENST00000468930;ENST00000470870;ENST00000468138;ENST00000462664;ENST00000478690;ENST00000488649;ENST00000459736;ENST00000475106;ENST00000230582;ENST00000484493;ENST00000492575;ENST00000377456;ENST00000495683	serine protease 16 [Source:HGNC Symbol;Acc:HGNC:9480]	retained_intron;nonsense_mediated_decay;processed_transcript;protein_coding	0.506107	-0.982486	0.00781449	down
ENSG00000111305	GSG1	ENST00000337630;ENST00000651961;ENST00000351606;ENST00000396302;ENST00000545699;ENST00000537302;ENST00000457134;ENST00000432710;ENST00000542415;ENST00000545401	germ cell associated 1 [Source:HGNC Symbol;Acc:HGNC:19716]	protein_coding	0.506397	-0.981659	0.00839648	down
ENSG00000164076	CAMKV	ENST00000477224;ENST00000488336;ENST00000478149;ENST00000472895;ENST00000476105;ENST00000466940;ENST00000487726;ENST00000463537;ENST00000296471;ENST00000483811;ENST00000479704;ENST00000620470;ENST00000475665;ENST00000466535;ENST00000480398;ENST00000467248;ENST00000498324	CaM kinase like vesicle associated [Source:HGNC Symbol;Acc:HGNC:28788]	protein_coding;retained_intron;nonsense_mediated_decay;processed_transcript	0.506515	-0.981322	2.9025e-05	down
ENSG00000151725	CENPU	ENST00000281453;ENST00000502461;ENST00000510146;ENST00000508095;ENST00000514781;ENST00000506535	centromere protein U [Source:HGNC Symbol;Acc:HGNC:21348]	protein_coding;retained_intron;nonsense_mediated_decay;processed_transcript	0.506632	-0.98099	5.28565e-06	down
ENSG00000101955	SRPX	ENST00000378533;ENST00000538295;ENST00000432886;ENST00000461865;ENST00000544439;ENST00000479015	sushi repeat containing protein X-linked [Source:HGNC Symbol;Acc:HGNC:11309]	protein_coding;processed_transcript	0.507541	-0.978403	0.000308651	down
ENSG00000156030	MIDEAS	ENST00000286523;ENST00000423556;ENST00000435371;ENST00000394071;ENST00000486739;ENST00000478847;ENST00000476562;ENST00000421708;ENST00000451078;ENST00000462716;ENST00000483269	mitotic deacetylase associated SANT domain protein [Source:HGNC Symbol;Acc:HGNC:19853]	protein_coding;processed_transcript;retained_intron;nonsense_mediated_decay	0.50772	-0.977895	3.91474e-07	down
ENSG00000132003	ZSWIM4	ENST00000254323;ENST00000590508;ENST00000592227	zinc finger SWIM-type containing 4 [Source:HGNC Symbol;Acc:HGNC:25704]	protein_coding	0.50776	-0.977781	2.63394e-06	down
ENSG00000129195	PIMREG	ENST00000572447;ENST00000571572;ENST00000250056;ENST00000571373;ENST00000573385;ENST00000570337;ENST00000572595;ENST00000576056;ENST00000573557	PICALM interacting mitotic regulator [Source:HGNC Symbol;Acc:HGNC:25483]	protein_coding;retained_intron;nonsense_mediated_decay	0.508495	-0.975696	4.96702e-05	down
ENSG00000196358	NTNG2	ENST00000393229;ENST00000490694;ENST00000483055;ENST00000372179	netrin G2 [Source:HGNC Symbol;Acc:HGNC:14288]	protein_coding;processed_transcript	0.508694	-0.975129	0.0229209	down
ENSG00000188994	ZNF292	ENST00000369577;ENST00000339907;ENST00000392985;ENST00000466062;ENST00000496806;ENST00000369578;ENST00000524067;ENST00000518845;ENST00000485016	zinc finger protein 292 [Source:HGNC Symbol;Acc:HGNC:18410]	protein_coding;processed_transcript	0.509201	-0.973693	9.925e-09	down
ENSG00000147324	MFHAS1	ENST00000276282;ENST00000521881;ENST00000520715;ENST00000520091	malignant fibrous histiocytoma amplified sequence 1 [Source:HGNC Symbol;Acc:HGNC:16982]	protein_coding;processed_transcript	0.509346	-0.973282	7.38016e-08	down
ENSG00000074211	PPP2R2C	ENST00000382599;ENST00000335585;ENST00000513943;ENST00000507028;ENST00000515571;ENST00000509917;ENST00000507294;ENST00000314348;ENST00000506140	protein phosphatase 2 regulatory subunit Bgamma [Source:HGNC Symbol;Acc:HGNC:9306]	protein_coding;retained_intron;processed_transcript;nonsense_mediated_decay	0.509374	-0.973202	0.00296591	down
ENSG00000144485	HES6	ENST00000272937;ENST00000409160;ENST00000409574;ENST00000450098;ENST00000409182;ENST00000417803;ENST00000409356;ENST00000436051;ENST00000409002	hes family bHLH transcription factor 6 [Source:HGNC Symbol;Acc:HGNC:18254]	protein_coding	0.509537	-0.972741	0.0136749	down
ENSG00000171848	RRM2	ENST00000360566;ENST00000304567;ENST00000641498;ENST00000652660;ENST00000491447;ENST00000615152;ENST00000485717;ENST00000474701;ENST00000461327;ENST00000646978;ENST00000498343;ENST00000459969;ENST00000462343;ENST00000641198;ENST00000487591;ENST00000619640;ENST00000381786;ENST00000607140;ENST00000642996	ribonucleotide reductase regulatory subunit M2 [Source:HGNC Symbol;Acc:HGNC:10452]	protein_coding;nonsense_mediated_decay;retained_intron;processed_transcript	0.509543	-0.972723	9.26214e-06	down
ENSG00000166845	C18orf54	ENST00000648616;ENST00000382911;ENST00000300091;ENST00000620105;ENST00000578138;ENST00000582188;ENST00000579594	chromosome 18 open reading frame 54 [Source:HGNC Symbol;Acc:HGNC:13796]	protein_coding;processed_transcript;nonsense_mediated_decay	0.510203	-0.970858	7.60833e-05	down
ENSG00000149782	PLCB3	ENST00000540288;ENST00000279230;ENST00000325234;ENST00000536243	phospholipase C beta 3 [Source:HGNC Symbol;Acc:HGNC:9056]	protein_coding;retained_intron	0.510417	-0.970251	2.42926e-06	down
ENSG00000153179	RASSF3	ENST00000542104;ENST00000540088;ENST00000637125;ENST00000283172;ENST00000636333;ENST00000336061	Ras association domain family member 3 [Source:HGNC Symbol;Acc:HGNC:14271]	protein_coding;processed_transcript;nonsense_mediated_decay	0.510543	-0.969894	2.32257e-05	down
ENSG00000112167	SAYSD1	ENST00000373249;ENST00000229903;ENST00000481599	SAYSVFN motif domain containing 1 [Source:HGNC Symbol;Acc:HGNC:21025]	protein_coding;processed_transcript	0.510708	-0.969428	0.00163153	down
ENSG00000072501	SMC1A	ENST00000322213;ENST00000470241;ENST00000675504;ENST00000375340;ENST00000463684;ENST00000675065;ENST00000674590;ENST00000469129	structural maintenance of chromosomes 1A [Source:HGNC Symbol;Acc:HGNC:11111]	protein_coding;nonsense_mediated_decay;retained_intron	0.510827	-0.969094	1.13574e-09	down
ENSG00000136261	BZW2	ENST00000630952;ENST00000433922;ENST00000258761;ENST00000436868;ENST00000437745;ENST00000432311;ENST00000405202;ENST00000415365;ENST00000407633;ENST00000430000;ENST00000452975;ENST00000446596;ENST00000438834;ENST00000480517	basic leucine zipper and W2 domains 2 [Source:HGNC Symbol;Acc:HGNC:18808]	protein_coding;nonsense_mediated_decay;processed_transcript;retained_intron	0.511036	-0.968502	3.46653e-08	down
ENSG00000118194	TNNT2	ENST00000515042;ENST00000367315;ENST00000491504;ENST00000458432;ENST00000476888;ENST00000494095;ENST00000360372;ENST00000466570;ENST00000503459;ENST00000663843;ENST00000656932;ENST00000475686;ENST00000658476;ENST00000660295;ENST00000455702;ENST00000666449;ENST00000412633;ENST00000445079;ENST00000662159;ENST00000367317;ENST00000367318;ENST00000367320;ENST00000509001;ENST00000477035;ENST00000438742…	troponin T2, cardiac type [Source:HGNC Symbol;Acc:HGNC:11949]	retained_intron;protein_coding;processed_transcript;nonsense_mediated_decay	0.511171	-0.968122	0.00101803	down
ENSG00000130340	SNX9	ENST00000392185;ENST00000614703;ENST00000614800	sorting nexin 9 [Source:HGNC Symbol;Acc:HGNC:14973]	protein_coding	0.511652	-0.966765	6.3165e-07	down
ENSG00000112984	KIF20A	ENST00000394894;ENST00000502338;ENST00000503417;ENST00000513276;ENST00000504621;ENST00000511638;ENST00000508792	kinesin family member 20A [Source:HGNC Symbol;Acc:HGNC:9787]	protein_coding;nonsense_mediated_decay;retained_intron	0.511715	-0.966587	1.42457e-06	down
ENSG00000186907	RTN4RL2	ENST00000335099;ENST00000533205;ENST00000395120	reticulon 4 receptor like 2 [Source:HGNC Symbol;Acc:HGNC:23053]	protein_coding	0.511896	-0.966077	0.00158861	down
ENSG00000137801	THBS1	ENST00000260356;ENST00000490247;ENST00000397591;ENST00000484734;ENST00000497720;ENST00000466755;ENST00000559746;ENST00000560894	thrombospondin 1 [Source:HGNC Symbol;Acc:HGNC:11785]	protein_coding;retained_intron	0.5122	-0.965221	3.03841e-08	down
ENSG00000029153	ARNTL2	ENST00000542388;ENST00000544915;ENST00000261178;ENST00000311001;ENST00000395901;ENST00000539558;ENST00000546179;ENST00000457040;ENST00000266503	aryl hydrocarbon receptor nuclear translocator like 2 [Source:HGNC Symbol;Acc:HGNC:18984]	protein_coding;processed_transcript	0.512871	-0.963331	0.00692298	down
ENSG00000136379	ABHD17C	ENST00000258884;ENST00000560126;ENST00000559506;ENST00000558464;ENST00000560609	abhydrolase domain containing 17C, depalmitoylase [Source:HGNC Symbol;Acc:HGNC:26925]	protein_coding;processed_transcript	0.51332	-0.96207	0.000227827	down
ENSG00000121957	GPSM2	ENST00000264126;ENST00000446797;ENST00000675776;ENST00000643921;ENST00000441735;ENST00000406462;ENST00000674700;ENST00000645255;ENST00000645164;ENST00000675086;ENST00000643643;ENST00000674914;ENST00000674731;ENST00000675740;ENST00000435475;ENST00000435987;ENST00000642355;ENST00000676184;ENST00000643094;ENST00000674663;ENST00000676404;ENST00000675829;ENST00000675617;ENST00000675087	G protein signaling modulator 2 [Source:HGNC Symbol;Acc:HGNC:29501]	protein_coding;retained_intron;processed_transcript;nonsense_mediated_decay	0.513448	-0.961711	6.6652e-05	down
ENSG00000196975	ANXA4	ENST00000477632;ENST00000394295;ENST00000471395;ENST00000409920;ENST00000635311;ENST00000460439;ENST00000484219;ENST00000460942;ENST00000472124;ENST00000468815;ENST00000418066;ENST00000487351	annexin A4 [Source:HGNC Symbol;Acc:HGNC:542]	retained_intron;protein_coding;nonsense_mediated_decay;processed_transcript	0.513703	-0.960994	4.16554e-05	down
ENSG00000070413	DGCR2	ENST00000263196;ENST00000467659;ENST00000545799;ENST00000389262;ENST00000608548;ENST00000473832;ENST00000537045	DiGeorge syndrome critical region gene 2 [Source:HGNC Symbol;Acc:HGNC:2845]	protein_coding;retained_intron;nonsense_mediated_decay;processed_transcript	0.513736	-0.960902	6.32317e-08	down
ENSG00000160293	VAV2	ENST00000406606;ENST00000371851;ENST00000371850;ENST00000472905;ENST00000486113	vav guanine nucleotide exchange factor 2 [Source:HGNC Symbol;Acc:HGNC:12658]	protein_coding;processed_transcript	0.513752	-0.960857	5.39976e-08	down
ENSG00000179604	CDC42EP4	ENST00000335793;ENST00000581014;ENST00000578516;ENST00000580315;ENST00000581045;ENST00000630622;ENST00000582303;ENST00000579611;ENST00000439510	CDC42 effector protein 4 [Source:HGNC Symbol;Acc:HGNC:17147]	protein_coding;processed_transcript	0.513892	-0.960464	3.29402e-06	down
ENSG00000203760	CENPW	ENST00000368328;ENST00000368325;ENST00000368326	centromere protein W [Source:HGNC Symbol;Acc:HGNC:21488]	protein_coding	0.513896	-0.960452	0.000129296	down
ENSG00000046889	PREX2	ENST00000288368;ENST00000517617;ENST00000529398;ENST00000520235;ENST00000522247	phosphatidylinositol-3,4,5-trisphosphate dependent Rac exchange factor 2 [Source:HGNC Symbol;Acc:HGNC:22950]	protein_coding;processed_transcript	0.514701	-0.958194	5.51285e-05	down
ENSG00000136848	DAB2IP	ENST00000648444;ENST00000309989;ENST00000373782;ENST00000408936;ENST00000465078;ENST00000648693;ENST00000394340;ENST00000459906;ENST00000436835;ENST00000489314;ENST00000259371;ENST00000487716	DAB2 interacting protein [Source:HGNC Symbol;Acc:HGNC:17294]	protein_coding;processed_transcript	0.515226	-0.956723	2.70399e-08	down
ENSG00000162992	NEUROD1	ENST00000295108;ENST00000496876	neuronal differentiation 1 [Source:HGNC Symbol;Acc:HGNC:7762]	protein_coding;processed_transcript	0.515246	-0.956666	0.00057929	down
ENSG00000137807	KIF23	ENST00000647715;ENST00000260363;ENST00000558303;ENST00000643966;ENST00000559279;ENST00000559456;ENST00000395392;ENST00000352331;ENST00000559283;ENST00000558346;ENST00000561089;ENST00000559944;ENST00000560042;ENST00000560125;ENST00000558585	kinesin family member 23 [Source:HGNC Symbol;Acc:HGNC:6392]	protein_coding;retained_intron;nonsense_mediated_decay;processed_transcript	0.515368	-0.956324	7.66669e-06	down
ENSG00000157985	AGAP1	ENST00000614409;ENST00000304032;ENST00000428334;ENST00000409538;ENST00000418654;ENST00000336665;ENST00000448025;ENST00000402604;ENST00000409457;ENST00000482882;ENST00000453371;ENST00000466575;ENST00000635100;ENST00000619456	ArfGAP with GTPase domain, ankyrin repeat and PH domain 1 [Source:HGNC Symbol;Acc:HGNC:16922]	protein_coding;retained_intron;processed_transcript;nonsense_mediated_decay	0.51547	-0.95604	1.63758e-08	down
ENSG00000138622	HCN4	ENST00000261917	hyperpolarization activated cyclic nucleotide gated potassium channel 4 [Source:HGNC Symbol;Acc:HGNC:16882]	protein_coding	0.515538	-0.955851	5.45402e-05	down
ENSG00000137710	RDX	ENST00000645495;ENST00000530131;ENST00000532461;ENST00000528498;ENST00000529774;ENST00000647231;ENST00000544551;ENST00000530301;ENST00000645527;ENST00000646663;ENST00000528900;ENST00000642511;ENST00000533678;ENST00000530749;ENST00000532118;ENST00000533961;ENST00000528556;ENST00000533991;ENST00000534683;ENST00000645312;ENST00000527537;ENST00000530085	radixin [Source:HGNC Symbol;Acc:HGNC:9944]	protein_coding;nonsense_mediated_decay;retained_intron;processed_transcript	0.515559	-0.95579	1.10412e-08	down
ENSG00000198720	ANKRD13B	ENST00000394859;ENST00000578943;ENST00000487527;ENST00000578811;ENST00000579719;ENST00000583728;ENST00000493506;ENST00000488766;ENST00000614878	ankyrin repeat domain 13B [Source:HGNC Symbol;Acc:HGNC:26363]	protein_coding;retained_intron;nonsense_mediated_decay	0.515949	-0.954698	0.000438729	down
ENSG00000099942	CRKL	ENST00000354336;ENST00000411769	CRK like proto-oncogene, adaptor protein [Source:HGNC Symbol;Acc:HGNC:2363]	protein_coding;nonsense_mediated_decay	0.515983	-0.954606	7.46074e-09	down
ENSG00000164082	GRM2	ENST00000395052;ENST00000464585;ENST00000475478;ENST00000496661;ENST00000442933;ENST00000419928;ENST00000296479;ENST00000477330	glutamate metabotropic receptor 2 [Source:HGNC Symbol;Acc:HGNC:4594]	protein_coding;retained_intron;processed_transcript;nonsense_mediated_decay	0.51616	-0.954111	4.58439e-05	down
ENSG00000072201	LNX1	ENST00000263925;ENST00000511398;ENST00000510143;ENST00000504605;ENST00000513421;ENST00000306888;ENST00000504299;ENST00000507168;ENST00000512247	ligand of numb-protein X 1 [Source:HGNC Symbol;Acc:HGNC:6657]	protein_coding;retained_intron;processed_transcript	0.516162	-0.954103	0.00694217	down
ENSG00000011426	ANLN	ENST00000265748;ENST00000457743;ENST00000396068;ENST00000491782;ENST00000441696;ENST00000424865;ENST00000428612;ENST00000495714;ENST00000429082;ENST00000446635;ENST00000460598;ENST00000418118;ENST00000452877	anillin actin binding protein [Source:HGNC Symbol;Acc:HGNC:14082]	protein_coding;retained_intron;nonsense_mediated_decay;processed_transcript	0.516208	-0.953975	8.7153e-09	down
ENSG00000049759	NEDD4L	ENST00000456173;ENST00000431212;ENST00000382850;ENST00000675244;ENST00000588712;ENST00000675699;ENST00000676251;ENST00000400345;ENST00000675434;ENST00000588494;ENST00000675101;ENST00000590638;ENST00000592846;ENST00000585363;ENST00000590694;ENST00000592601;ENST00000592097;ENST00000587634;ENST00000585323;ENST00000587190;ENST00000675221;ENST00000435432;ENST00000356462;ENST00000676301;ENST00000675554…	NEDD4 like E3 ubiquitin protein ligase [Source:HGNC Symbol;Acc:HGNC:7728]	protein_coding;retained_intron;processed_transcript;nonsense_mediated_decay	0.516296	-0.953731	8.27262e-09	down
ENSG00000153214	TMEM87B	ENST00000650799;ENST00000649734;ENST00000283206;ENST00000452614;ENST00000463427;ENST00000471632;ENST00000452029	transmembrane protein 87B [Source:HGNC Symbol;Acc:HGNC:25913]	protein_coding;processed_transcript;nonsense_mediated_decay	0.516516	-0.953114	4.90008e-06	down
ENSG00000150893	FREM2	ENST00000280481;ENST00000482551	FRAS1 related extracellular matrix 2 [Source:HGNC Symbol;Acc:HGNC:25396]	protein_coding;processed_transcript	0.516584	-0.952924	1.4725e-07	down
ENSG00000110171	TRIM3	ENST00000533064;ENST00000532542;ENST00000345851;ENST00000639856;ENST00000529529;ENST00000526845;ENST00000530724;ENST00000533309;ENST00000359518;ENST00000528227;ENST00000529058;ENST00000527237;ENST00000536344;ENST00000525074;ENST00000528932	tripartite motif containing 3 [Source:HGNC Symbol;Acc:HGNC:10064]	retained_intron;protein_coding;processed_transcript	0.51695	-0.951903	0.000461867	down
ENSG00000138778	CENPE	ENST00000265148;ENST00000380026;ENST00000509823;ENST00000515478;ENST00000514974;ENST00000611174;ENST00000509120	centromere protein E [Source:HGNC Symbol;Acc:HGNC:1856]	protein_coding;retained_intron	0.517489	-0.950401	2.14504e-05	down
ENSG00000038210	PI4K2B	ENST00000264864;ENST00000512921	phosphatidylinositol 4-kinase type 2 beta [Source:HGNC Symbol;Acc:HGNC:18215]	protein_coding	0.517491	-0.950395	0.000127624	down
ENSG00000173846	PLK3	ENST00000492398;ENST00000372201;ENST00000465443;ENST00000476731;ENST00000493100;ENST00000461358;ENST00000461769	polo like kinase 3 [Source:HGNC Symbol;Acc:HGNC:2154]	processed_transcript;protein_coding	0.517787	-0.949569	0.000364761	down
ENSG00000142327	RNPEPL1	ENST00000270357;ENST00000481757;ENST00000486058;ENST00000471657;ENST00000451363;ENST00000498042;ENST00000464550;ENST00000437406;ENST00000460884;ENST00000493398	arginyl aminopeptidase like 1 [Source:HGNC Symbol;Acc:HGNC:10079]	protein_coding;retained_intron;processed_transcript	0.517951	-0.949112	0.00022262	down
ENSG00000100056	ESS2	ENST00000472073;ENST00000252137;ENST00000434568;ENST00000469466	ess-2 splicing factor homolog [Source:HGNC Symbol;Acc:HGNC:16817]	retained_intron;protein_coding;nonsense_mediated_decay	0.518051	-0.948835	5.88887e-05	down
ENSG00000105939	ZC3HAV1	ENST00000471652;ENST00000242351;ENST00000460845;ENST00000464606	zinc finger CCCH-type containing, antiviral 1 [Source:HGNC Symbol;Acc:HGNC:23721]	protein_coding	0.518159	-0.948532	1.30686e-05	down
ENSG00000173406	DAB1	ENST00000414851;ENST00000371231;ENST00000371236;ENST00000332102;ENST00000371232;ENST00000420954;ENST00000371230;ENST00000489267;ENST00000477280;ENST00000485760;ENST00000473821	DAB adaptor protein 1 [Source:HGNC Symbol;Acc:HGNC:2661]	protein_coding;processed_transcript	0.518261	-0.94825	0.000414976	down
ENSG00000237649	KIFC1	ENST00000428849;ENST00000494554;ENST00000450504;ENST00000486695	kinesin family member C1 [Source:HGNC Symbol;Acc:HGNC:6389]	protein_coding;retained_intron	0.518661	-0.947136	2.38749e-06	down
ENSG00000133083	DCLK1	ENST00000379892;ENST00000460982;ENST00000379893;ENST00000255448;ENST00000615680;ENST00000360631;ENST00000486239;ENST00000477664	doublecortin like kinase 1 [Source:HGNC Symbol;Acc:HGNC:2700]	protein_coding;processed_transcript	0.519307	-0.945339	0.0007305	down
ENSG00000159753	CARMIL2	ENST00000545661;ENST00000334583;ENST00000602368;ENST00000602467;ENST00000602742;ENST00000602924;ENST00000602931;ENST00000602562;ENST00000602563;ENST00000602321;ENST00000602705;ENST00000602633	capping protein regulator and myosin 1 linker 2 [Source:HGNC Symbol;Acc:HGNC:27089]	protein_coding;nonsense_mediated_decay;retained_intron	0.51937	-0.945166	0.00416822	down
ENSG00000270800	RPS10-NUDT3	ENST00000639725;ENST00000639877;ENST00000605528;ENST00000494077	RPS10-NUDT3 readthrough [Source:HGNC Symbol;Acc:HGNC:49181]	protein_coding	0.519477	-0.944868	4.96702e-05	down
ENSG00000198246	SLC29A3	ENST00000373189;ENST00000644591;ENST00000644895;ENST00000644088;ENST00000642772;ENST00000469204;ENST00000643752;ENST00000643619;ENST00000642198;ENST00000647524;ENST00000479577;ENST00000645345;ENST00000643042	solute carrier family 29 member 3 [Source:HGNC Symbol;Acc:HGNC:23096]	protein_coding;nonsense_mediated_decay;processed_transcript	0.519606	-0.94451	0.00113638	down
ENSG00000185664	PMEL	ENST00000550464;ENST00000547137;ENST00000548747;ENST00000550762;ENST00000549404;ENST00000550590;ENST00000449260;ENST00000556802;ENST00000548689;ENST00000552882;ENST00000549564;ENST00000549233;ENST00000546543;ENST00000548493;ENST00000550447;ENST00000549413;ENST00000548803;ENST00000549430;ENST00000549418	premelanosome protein [Source:HGNC Symbol;Acc:HGNC:10880]	protein_coding;retained_intron;processed_transcript	0.519828	-0.943895	2.35838e-08	down
ENSG00000183908	LRRC55	ENST00000497933;ENST00000652194	leucine rich repeat containing 55 [Source:HGNC Symbol;Acc:HGNC:32324]	protein_coding	0.519891	-0.943718	1.80674e-05	down
ENSG00000160229	ZNF66	ENST00000344519;ENST00000594534;ENST00000360204	zinc finger protein 66 [Source:HGNC Symbol;Acc:HGNC:13135]	protein_coding	0.520095	-0.943152	0.00215268	down
ENSG00000068400	GRIPAP1	ENST00000619107;ENST00000473581;ENST00000619149;ENST00000593475;ENST00000474512;ENST00000376423;ENST00000495258;ENST00000611705;ENST00000621664;ENST00000622599;ENST00000480041;ENST00000622231;ENST00000488361;ENST00000611757;ENST00000617369	GRIP1 associated protein 1 [Source:HGNC Symbol;Acc:HGNC:18706]	protein_coding;retained_intron;nonsense_mediated_decay;processed_transcript	0.520143	-0.94302	7.03298e-08	down
ENSG00000067113	PLPP1	ENST00000307259;ENST00000515132;ENST00000264775;ENST00000520263;ENST00000502907;ENST00000509667	phospholipid phosphatase 1 [Source:HGNC Symbol;Acc:HGNC:9228]	protein_coding;processed_transcript;retained_intron;nonsense_mediated_decay	0.520372	-0.942385	5.08469e-06	down
ENSG00000128016	ZFP36	ENST00000597629;ENST00000594442;ENST00000652583;ENST00000594045;ENST00000600033	ZFP36 ring finger protein [Source:HGNC Symbol;Acc:HGNC:12862]	protein_coding;processed_transcript	0.521455	-0.939385	0.00142528	down
ENSG00000137460	FHDC1	ENST00000260008;ENST00000511601	FH2 domain containing 1 [Source:HGNC Symbol;Acc:HGNC:29363]	protein_coding	0.521517	-0.939213	2.57382e-06	down
ENSG00000186007	LEMD1	ENST00000476884;ENST00000495594;ENST00000367149;ENST00000367154;ENST00000367152;ENST00000391936;ENST00000367153;ENST00000367151	LEM domain containing 1 [Source:HGNC Symbol;Acc:HGNC:18725]	processed_transcript;protein_coding	0.521535	-0.939164	0.0476628	down
ENSG00000130475	FCHO1	ENST00000597512;ENST00000597718;ENST00000595023;ENST00000596951;ENST00000596522;ENST00000593833;ENST00000598539;ENST00000598960;ENST00000600393;ENST00000593385;ENST00000596309;ENST00000252771;ENST00000600201;ENST00000594202;ENST00000598086;ENST00000602111;ENST00000595749;ENST00000596865;ENST00000595594;ENST00000597474;ENST00000600058;ENST00000598067;ENST00000601247;ENST00000600209;ENST00000600676…	FCH and mu domain containing endocytic adaptor 1 [Source:HGNC Symbol;Acc:HGNC:29002]	protein_coding;retained_intron;processed_transcript	0.521683	-0.938754	0.00277979	down
ENSG00000078140	UBE2K	ENST00000510719;ENST00000261427;ENST00000445950;ENST00000438068;ENST00000503368;ENST00000510934;ENST00000513231	ubiquitin conjugating enzyme E2 K [Source:HGNC Symbol;Acc:HGNC:4914]	nonsense_mediated_decay;protein_coding;processed_transcript	0.521707	-0.938688	0.0145461	down
ENSG00000106341	PPP1R17	ENST00000342032;ENST00000409146;ENST00000498609	protein phosphatase 1 regulatory subunit 17 [Source:HGNC Symbol;Acc:HGNC:16973]	protein_coding;processed_transcript	0.521979	-0.937937	0.00698149	down
ENSG00000106278	PTPRZ1	ENST00000651320;ENST00000650728;ENST00000651863;ENST00000651065;ENST00000449182;ENST00000652298;ENST00000393386;ENST00000483028;ENST00000468641;ENST00000650681;ENST00000651842;ENST00000652054;ENST00000471837;ENST00000474500;ENST00000489114;ENST00000651390;ENST00000470504;ENST00000651841;ENST00000483995;ENST00000650826;ENST00000652708	protein tyrosine phosphatase receptor type Z1 [Source:HGNC Symbol;Acc:HGNC:9685]	protein_coding;processed_transcript;retained_intron;nonsense_mediated_decay	0.522188	-0.937358	2.01473e-06	down
ENSG00000006327	TNFRSF12A	ENST00000571351;ENST00000326577;ENST00000341627;ENST00000573001;ENST00000575836;ENST00000574699;ENST00000575124	TNF receptor superfamily member 12A [Source:HGNC Symbol;Acc:HGNC:18152]	retained_intron;protein_coding;nonsense_mediated_decay	0.522269	-0.937134	5.9622e-07	down
ENSG00000168487	BMP1	ENST00000520970;ENST00000471755;ENST00000521385;ENST00000306385;ENST00000520626;ENST00000522332;ENST00000520982;ENST00000306349;ENST00000483364;ENST00000523749;ENST00000517324;ENST00000518913;ENST00000354870;ENST00000523849;ENST00000521521;ENST00000518656;ENST00000397814;ENST00000523457	bone morphogenetic protein 1 [Source:HGNC Symbol;Acc:HGNC:1067]	nonsense_mediated_decay;protein_coding;retained_intron;processed_transcript	0.522934	-0.935299	2.2037e-06	down
ENSG00000133687	TMTC1	ENST00000539277;ENST00000553189;ENST00000551659;ENST00000552925;ENST00000546582;ENST00000552618;ENST00000319685;ENST00000550354;ENST00000256062	transmembrane O-mannosyltransferase targeting cadherins 1 [Source:HGNC Symbol;Acc:HGNC:24099]	protein_coding;retained_intron;processed_transcript	0.522978	-0.935177	4.00416e-06	down
ENSG00000183386	FHL3	ENST00000485803;ENST00000373016;ENST00000477194;ENST00000475084;ENST00000483132	four and a half LIM domains 3 [Source:HGNC Symbol;Acc:HGNC:3704]	processed_transcript;protein_coding	0.523935	-0.93254	0.000154673	down
ENSG00000132872	SYT4	ENST00000255224;ENST00000590752;ENST00000585604;ENST00000591820;ENST00000593720;ENST00000589479;ENST00000586678;ENST00000596867	synaptotagmin 4 [Source:HGNC Symbol;Acc:HGNC:11512]	protein_coding;processed_transcript	0.524276	-0.931601	9.30972e-07	down
ENSG00000181061	HIGD1A	ENST00000321331;ENST00000470543;ENST00000452906;ENST00000418900;ENST00000430190	HIG1 hypoxia inducible domain family member 1A [Source:HGNC Symbol;Acc:HGNC:29527]	protein_coding;processed_transcript	0.524418	-0.931211	0.0021151	down
ENSG00000147509	RGS20	ENST00000276500;ENST00000297313;ENST00000522225;ENST00000344277;ENST00000523280;ENST00000518286;ENST00000517659;ENST00000523064;ENST00000523414;ENST00000517405	regulator of G protein signaling 20 [Source:HGNC Symbol;Acc:HGNC:14600]	protein_coding;nonsense_mediated_decay;processed_transcript	0.524838	-0.930056	0.0145368	down
ENSG00000117394	SLC2A1	ENST00000676254;ENST00000675112;ENST00000426263;ENST00000674545;ENST00000625233;ENST00000475162;ENST00000630287;ENST00000676097;ENST00000630821;ENST00000460369;ENST00000415851;ENST00000372500;ENST00000629908;ENST00000669445;ENST00000674765	solute carrier family 2 member 1 [Source:HGNC Symbol;Acc:HGNC:11005]	retained_intron;protein_coding;nonsense_mediated_decay;processed_transcript	0.52488	-0.929941	7.38571e-05	down
ENSG00000148400	NOTCH1	ENST00000651671;ENST00000645828;ENST00000491649;ENST00000494783;ENST00000646957	notch receptor 1 [Source:HGNC Symbol;Acc:HGNC:7881]	protein_coding;retained_intron;processed_transcript	0.525281	-0.928838	4.38069e-06	down
ENSG00000183196	CHST6	ENST00000332272;ENST00000390664;ENST00000649341;ENST00000649824	carbohydrate sulfotransferase 6 [Source:HGNC Symbol;Acc:HGNC:6938]	protein_coding;nonsense_mediated_decay	0.525504	-0.928226	0.0229209	down
ENSG00000173821	RNF213	ENST00000508628;ENST00000319921;ENST00000582970;ENST00000411702;ENST00000559070;ENST00000560694;ENST00000558116;ENST00000560083;ENST00000573038;ENST00000572622;ENST00000559864;ENST00000574060;ENST00000571908;ENST00000573548;ENST00000570776;ENST00000427003;ENST00000559603;ENST00000574909;ENST00000573919;ENST00000558488	ring finger protein 213 [Source:HGNC Symbol;Acc:HGNC:14539]	protein_coding;retained_intron;processed_transcript	0.525626	-0.927892	7.04089e-07	down
ENSG00000123505	AMD1	ENST00000619590;ENST00000672937;ENST00000612642;ENST00000451850;ENST00000368877;ENST00000675380;ENST00000465404;ENST00000368876;ENST00000368885;ENST00000368882	adenosylmethionine decarboxylase 1 [Source:HGNC Symbol;Acc:HGNC:457]	retained_intron;protein_coding;nonsense_mediated_decay	0.525745	-0.927565	5.54803e-05	down
ENSG00000106483	SFRP4	ENST00000436072;ENST00000478975;ENST00000447200	secreted frizzled related protein 4 [Source:HGNC Symbol;Acc:HGNC:10778]	protein_coding;retained_intron	0.525761	-0.927521	0.0325493	down
ENSG00000075790	BCAP29	ENST00000486326;ENST00000005259;ENST00000445771;ENST00000491150;ENST00000436699;ENST00000465919;ENST00000479917;ENST00000473124;ENST00000379117;ENST00000466094;ENST00000442065;ENST00000482371;ENST00000421217;ENST00000490060;ENST00000457837;ENST00000494086	B cell receptor associated protein 29 [Source:HGNC Symbol;Acc:HGNC:24131]	retained_intron;protein_coding;processed_transcript;nonsense_mediated_decay	0.525869	-0.927226	0.0390636	down
ENSG00000118985	ELL2	ENST00000237853;ENST00000508694;ENST00000505584;ENST00000513343;ENST00000508757;ENST00000515020;ENST00000635633;ENST00000506628	elongation factor for RNA polymerase II 2 [Source:HGNC Symbol;Acc:HGNC:17064]	protein_coding;retained_intron;nonsense_mediated_decay;processed_transcript	0.525962	-0.926968	8.01235e-06	down
ENSG00000176406	RIMS2	ENST00000339750;ENST00000666250;ENST00000504942;ENST00000668113;ENST00000436393;ENST00000523362;ENST00000632716;ENST00000501515;ENST00000512598;ENST00000507740;ENST00000515551;ENST00000408894;ENST00000511046;ENST00000262231;ENST00000507677;ENST00000395361	regulating synaptic membrane exocytosis 2 [Source:HGNC Symbol;Acc:HGNC:17283]	protein_coding;processed_transcript;retained_intron	0.526075	-0.926661	0.000122679	down
ENSG00000184635	ZNF93	ENST00000592160;ENST00000343769;ENST00000586021;ENST00000588146;ENST00000591366;ENST00000592613;ENST00000592245;ENST00000638737;ENST00000589903	zinc finger protein 93 [Source:HGNC Symbol;Acc:HGNC:13169]	protein_coding;nonsense_mediated_decay;processed_transcript	0.526317	-0.925995	3.59778e-06	down
ENSG00000204624	DISP3	ENST00000294484;ENST00000423056;ENST00000304391	dispatched RND transporter family member 3 [Source:HGNC Symbol;Acc:HGNC:29251]	protein_coding;processed_transcript	0.526785	-0.924714	0.000227988	down
ENSG00000133874	RNF122	ENST00000256257	ring finger protein 122 [Source:HGNC Symbol;Acc:HGNC:21147]	protein_coding	0.526813	-0.924638	4.23849e-05	down
ENSG00000104967	NOVA2	ENST00000676183;ENST00000263257;ENST00000596784;ENST00000599462	NOVA alternative splicing regulator 2 [Source:HGNC Symbol;Acc:HGNC:7887]	protein_coding;processed_transcript	0.527016	-0.924082	2.65533e-05	down
ENSG00000011638	TMEM159	ENST00000261388;ENST00000233047;ENST00000572258;ENST00000572599;ENST00000573688;ENST00000574092;ENST00000573487;ENST00000577162;ENST00000451578	transmembrane protein 159 [Source:HGNC Symbol;Acc:HGNC:30136]	protein_coding;nonsense_mediated_decay;processed_transcript	0.527037	-0.924025	0.0133645	down
ENSG00000164330	EBF1	ENST00000313708;ENST00000517373;ENST00000522192;ENST00000622875;ENST00000519890;ENST00000518323;ENST00000380654;ENST00000523464;ENST00000518836;ENST00000519739;ENST00000523315	EBF transcription factor 1 [Source:HGNC Symbol;Acc:HGNC:3126]	protein_coding;retained_intron;processed_transcript	0.527187	-0.923613	0.000106973	down
ENSG00000214530	STARD10	ENST00000334805;ENST00000537947;ENST00000543304;ENST00000545082;ENST00000544767;ENST00000538536;ENST00000539138;ENST00000536728;ENST00000535075;ENST00000535054;ENST00000535267;ENST00000536290;ENST00000542989;ENST00000536377;ENST00000400925;ENST00000538009;ENST00000546314;ENST00000540587;ENST00000537351;ENST00000543089;ENST00000538437	StAR related lipid transfer domain containing 10 [Source:HGNC Symbol;Acc:HGNC:10666]	protein_coding;retained_intron;processed_transcript	0.527852	-0.921795	0.00270612	down
ENSG00000072195	SPEG	ENST00000396688;ENST00000475921;ENST00000462545;ENST00000431523;ENST00000312358;ENST00000464989;ENST00000435853;ENST00000403148;ENST00000451076;ENST00000463218;ENST00000396686;ENST00000498378;ENST00000497065;ENST00000452101;ENST00000420132;ENST00000491248;ENST00000409595;ENST00000396698;ENST00000485069;ENST00000396689;ENST00000485813;ENST00000496786	striated muscle enriched protein kinase [Source:HGNC Symbol;Acc:HGNC:16901]	protein_coding;retained_intron;processed_transcript;nonsense_mediated_decay	0.527945	-0.921539	0.000471789	down
ENSG00000110076	NRXN2	ENST00000265459;ENST00000377559;ENST00000437746;ENST00000464307;ENST00000301894;ENST00000409571;ENST00000486057;ENST00000496291;ENST00000487484;ENST00000417749;ENST00000442300;ENST00000423049;ENST00000475737;ENST00000467055;ENST00000466324	neurexin 2 [Source:HGNC Symbol;Acc:HGNC:8009]	protein_coding;retained_intron;processed_transcript	0.528148	-0.920986	0.000674149	down
ENSG00000151690	MFSD6	ENST00000392328;ENST00000434582;ENST00000281416;ENST00000432036;ENST00000412482;ENST00000489793;ENST00000444317;ENST00000445546;ENST00000486123;ENST00000417958	major facilitator superfamily domain containing 6 [Source:HGNC Symbol;Acc:HGNC:24711]	protein_coding;nonsense_mediated_decay;processed_transcript;retained_intron	0.528158	-0.920958	0.00121127	down
ENSG00000134030	CTIF	ENST00000587860;ENST00000256413;ENST00000382998;ENST00000591387;ENST00000587752;ENST00000588345;ENST00000591412;ENST00000590422;ENST00000587769;ENST00000592658;ENST00000589585	cap binding complex dependent translation initiation factor [Source:HGNC Symbol;Acc:HGNC:23925]	retained_intron;protein_coding;processed_transcript	0.528378	-0.920359	5.51509e-05	down
ENSG00000163590	PPM1L	ENST00000498165;ENST00000497343;ENST00000295839;ENST00000480117;ENST00000464260	protein phosphatase, Mg2+/Mn2+ dependent 1L [Source:HGNC Symbol;Acc:HGNC:16381]	protein_coding;processed_transcript	0.528505	-0.92001	1.76126e-06	down
ENSG00000092853	CLSPN	ENST00000251195;ENST00000318121;ENST00000373220;ENST00000517467;ENST00000466308;ENST00000520551	claspin [Source:HGNC Symbol;Acc:HGNC:19715]	protein_coding;retained_intron;processed_transcript	0.528549	-0.919891	4.12528e-05	down
ENSG00000116133	DHCR24	ENST00000436604;ENST00000535035;ENST00000371269;ENST00000649769;ENST00000648712;ENST00000647912;ENST00000648494;ENST00000647585;ENST00000648641;ENST00000650362;ENST00000648182;ENST00000648728	24-dehydrocholesterol reductase [Source:HGNC Symbol;Acc:HGNC:2859]	protein_coding;nonsense_mediated_decay;processed_transcript	0.528574	-0.919822	0.000199535	down
ENSG00000179915	NRXN1	ENST00000675235;ENST00000405472;ENST00000628515;ENST00000625320;ENST00000406316;ENST00000342183;ENST00000331040;ENST00000462791;ENST00000628364;ENST00000637889;ENST00000401710;ENST00000637679;ENST00000626249;ENST00000625891;ENST00000637459;ENST00000636818;ENST00000637906;ENST00000630431;ENST00000484192;ENST00000635310;ENST00000634764;ENST00000638037;ENST00000636104;ENST00000627198;ENST00000416262…	neurexin 1 [Source:HGNC Symbol;Acc:HGNC:8008]	protein_coding;nonsense_mediated_decay;retained_intron;processed_transcript	0.528641	-0.91964	0.000308513	down
ENSG00000100604	CHGA	ENST00000216492;ENST00000334654;ENST00000556076;ENST00000553866;ENST00000556098;ENST00000556876	chromogranin A [Source:HGNC Symbol;Acc:HGNC:1929]	protein_coding;nonsense_mediated_decay;processed_transcript;retained_intron	0.529434	-0.917477	0.000112083	down
ENSG00000203326	ZNF525	ENST00000474037;ENST00000467003;ENST00000497729;ENST00000601790;ENST00000475179;ENST00000593918;ENST00000600148;ENST00000491101	zinc finger protein 525 [Source:HGNC Symbol;Acc:HGNC:29423]	protein_coding;retained_intron;processed_transcript	0.529747	-0.916624	0.0034662	down
ENSG00000137486	ARRB1	ENST00000360025;ENST00000420843;ENST00000527385;ENST00000529741;ENST00000530086;ENST00000533255;ENST00000532525;ENST00000533609;ENST00000531012;ENST00000524400;ENST00000532447;ENST00000529280	arrestin beta 1 [Source:HGNC Symbol;Acc:HGNC:711]	protein_coding;nonsense_mediated_decay;retained_intron	0.530062	-0.915767	0.000105043	down
ENSG00000184261	KCNK12	ENST00000327876;ENST00000493527	potassium two pore domain channel subfamily K member 12 [Source:HGNC Symbol;Acc:HGNC:6274]	protein_coding;processed_transcript	0.53021	-0.915364	0.0389776	down
ENSG00000169679	BUB1	ENST00000478175;ENST00000466333;ENST00000671097;ENST00000302759;ENST00000490632;ENST00000409311;ENST00000666956;ENST00000468927;ENST00000420328;ENST00000465029;ENST00000477481;ENST00000447014;ENST00000535254;ENST00000436916	BUB1 mitotic checkpoint serine/threonine kinase [Source:HGNC Symbol;Acc:HGNC:1148]	processed_transcript;retained_intron;nonsense_mediated_decay;protein_coding	0.530532	-0.914489	4.14953e-06	down
ENSG00000134323	MYCN	ENST00000281043;ENST00000638417	MYCN proto-oncogene, bHLH transcription factor [Source:HGNC Symbol;Acc:HGNC:7559]	protein_coding	0.530925	-0.91342	8.29753e-05	down
ENSG00000143036	SLC44A3	ENST00000529450;ENST00000271227;ENST00000446120;ENST00000530397;ENST00000467909;ENST00000422520;ENST00000475883;ENST00000532670;ENST00000532427;ENST00000527077	solute carrier family 44 member 3 [Source:HGNC Symbol;Acc:HGNC:28689]	protein_coding;processed_transcript;nonsense_mediated_decay	0.531044	-0.913097	0.0297113	down
ENSG00000138448	ITGAV	ENST00000261023;ENST00000496477;ENST00000374907;ENST00000474571;ENST00000496854;ENST00000460641;ENST00000433736;ENST00000430709	integrin subunit alpha V [Source:HGNC Symbol;Acc:HGNC:6150]	protein_coding;retained_intron;processed_transcript	0.531154	-0.912797	1.01522e-06	down
ENSG00000130402	ACTN4	ENST00000440400;ENST00000588618;ENST00000252699;ENST00000489451;ENST00000586538;ENST00000497637;ENST00000390009;ENST00000589528;ENST00000495553;ENST00000424234;ENST00000477174	actinin alpha 4 [Source:HGNC Symbol;Acc:HGNC:166]	protein_coding;retained_intron;processed_transcript	0.531267	-0.912491	4.23438e-08	down
ENSG00000058668	ATP2B4	ENST00000357681;ENST00000341360;ENST00000458092;ENST00000466407;ENST00000484746;ENST00000367218;ENST00000356729	ATPase plasma membrane Ca2+ transporting 4 [Source:HGNC Symbol;Acc:HGNC:817]	protein_coding;processed_transcript;nonsense_mediated_decay	0.53227	-0.90977	0.0114464	down
ENSG00000013810	TACC3	ENST00000313288;ENST00000484651;ENST00000651817;ENST00000404054;ENST00000650779;ENST00000484264;ENST00000612220;ENST00000652770;ENST00000493975;ENST00000458173;ENST00000467746;ENST00000651472;ENST00000466077;ENST00000470808;ENST00000470136;ENST00000651251	transforming acidic coiled-coil containing protein 3 [Source:HGNC Symbol;Acc:HGNC:11524]	protein_coding;retained_intron;nonsense_mediated_decay;processed_transcript	0.532638	-0.908773	1.05203e-07	down
ENSG00000116183	PAPPA2	ENST00000367662;ENST00000493665;ENST00000367661;ENST00000479836;ENST00000486075	pappalysin 2 [Source:HGNC Symbol;Acc:HGNC:14615]	protein_coding;processed_transcript	0.532717	-0.908559	0.00676159	down
ENSG00000000460	C1orf112	ENST00000459772;ENST00000359326;ENST00000496973;ENST00000413811;ENST00000286031;ENST00000481744;ENST00000472795;ENST00000466580;ENST00000498289	chromosome 1 open reading frame 112 [Source:HGNC Symbol;Acc:HGNC:25565]	nonsense_mediated_decay;protein_coding;processed_transcript	0.532827	-0.90826	0.000124437	down
ENSG00000092820	EZR	ENST00000337147;ENST00000367075;ENST00000476189;ENST00000392177	ezrin [Source:HGNC Symbol;Acc:HGNC:12691]	protein_coding;processed_transcript	0.53351	-0.906413	1.79793e-07	down
ENSG00000103811	CTSH	ENST00000220166;ENST00000530010;ENST00000533777;ENST00000527715;ENST00000525807;ENST00000528436;ENST00000534237;ENST00000649928;ENST00000529263;ENST00000529861;ENST00000534038;ENST00000534268;ENST00000534533;ENST00000527138;ENST00000530929;ENST00000528191;ENST00000529612;ENST00000615999;ENST00000528741	cathepsin H [Source:HGNC Symbol;Acc:HGNC:2535]	protein_coding;retained_intron;nonsense_mediated_decay;processed_transcript	0.53354	-0.906333	0.000189809	down
ENSG00000188613	NANOS1	ENST00000340087;ENST00000425699	nanos C2HC-type zinc finger 1 [Source:HGNC Symbol;Acc:HGNC:23044]	protein_coding	0.533748	-0.90577	0.00137993	down
ENSG00000146285	SCML4	ENST00000369020;ENST00000369025;ENST00000479803;ENST00000369022;ENST00000463507;ENST00000476798;ENST00000426221;ENST00000473515;ENST00000440927;ENST00000459992;ENST00000369021	Scm polycomb group protein like 4 [Source:HGNC Symbol;Acc:HGNC:21397]	protein_coding;processed_transcript;retained_intron;nonsense_mediated_decay	0.533824	-0.905565	0.0016287	down
ENSG00000197406	DIO3	ENST00000510508	iodothyronine deiodinase 3 [Source:HGNC Symbol;Acc:HGNC:2885]	protein_coding	0.533908	-0.905337	0.0199103	down
ENSG00000184602	SNN	ENST00000329565	stannin [Source:HGNC Symbol;Acc:HGNC:11149]	protein_coding	0.534046	-0.904965	2.35122e-08	down
ENSG00000146216	TTBK1	ENST00000304139;ENST00000259750	tau tubulin kinase 1 [Source:HGNC Symbol;Acc:HGNC:19140]	protein_coding	0.534338	-0.904176	0.000186518	down
ENSG00000166897	ELFN2	ENST00000402918;ENST00000451509;ENST00000414347;ENST00000415408;ENST00000435824;ENST00000424973	extracellular leucine rich repeat and fibronectin type III domain containing 2 [Source:HGNC Symbol;Acc:HGNC:29396]	protein_coding;processed_transcript	0.53454	-0.903629	0.0468388	down
ENSG00000185386	MAPK11	ENST00000330651;ENST00000495277;ENST00000395764;ENST00000417877	mitogen-activated protein kinase 11 [Source:HGNC Symbol;Acc:HGNC:6873]	protein_coding;processed_transcript;nonsense_mediated_decay	0.534619	-0.903416	0.0343733	down
ENSG00000281406	BLACAT1	ENST00000626538;ENST00000629624;ENST00000629113;ENST00000625854	bladder cancer associated transcript 1 [Source:HGNC Symbol;Acc:HGNC:48597]	protein_coding;processed_transcript	0.534682	-0.903247	0.000184519	down
ENSG00000134824	FADS2	ENST00000278840;ENST00000522359;ENST00000523235;ENST00000521571;ENST00000521849;ENST00000257261;ENST00000522056;ENST00000355484;ENST00000517312;ENST00000543584;ENST00000522639;ENST00000520145;ENST00000574708;ENST00000518606;ENST00000517839	fatty acid desaturase 2 [Source:HGNC Symbol;Acc:HGNC:3575]	protein_coding;retained_intron	0.535088	-0.902152	2.72011e-06	down
ENSG00000213988	ZNF90	ENST00000469078;ENST00000418063;ENST00000474284;ENST00000484032;ENST00000492328;ENST00000473524	zinc finger protein 90 [Source:HGNC Symbol;Acc:HGNC:13165]	nonsense_mediated_decay;protein_coding;processed_transcript;retained_intron	0.535191	-0.901875	0.00308981	down
ENSG00000151914	DST	ENST00000449297;ENST00000370765;ENST00000651790;ENST00000487754;ENST00000517840;ENST00000518464;ENST00000312431;ENST00000340834;ENST00000361203;ENST00000523292;ENST00000482156;ENST00000651941;ENST00000518398;ENST00000520645;ENST00000421834;ENST00000370788;ENST00000651289;ENST00000523967;ENST00000522360;ENST00000244364;ENST00000524302;ENST00000650917;ENST00000523597;ENST00000517937;ENST00000651457…	dystonin [Source:HGNC Symbol;Acc:HGNC:1090]	protein_coding;retained_intron;nonsense_mediated_decay;processed_transcript	0.535616	-0.90073	6.67172e-08	down
ENSG00000198142	SOWAHC	ENST00000356454	sosondowah ankyrin repeat domain family member C [Source:HGNC Symbol;Acc:HGNC:26149]	protein_coding	0.535745	-0.900383	0.000249994	down
ENSG00000164211	STARD4	ENST00000512160;ENST00000502322;ENST00000296632;ENST00000511137;ENST00000508215;ENST00000511569;ENST00000502931;ENST00000455172;ENST00000505803;ENST00000511436;ENST00000510346;ENST00000509887	StAR related lipid transfer domain containing 4 [Source:HGNC Symbol;Acc:HGNC:18058]	protein_coding;nonsense_mediated_decay;retained_intron;processed_transcript	0.536196	-0.899167	7.31297e-05	down
ENSG00000198346	ZNF813	ENST00000396403;ENST00000468450;ENST00000490956	zinc finger protein 813 [Source:HGNC Symbol;Acc:HGNC:33257]	protein_coding	0.536315	-0.898847	0.00339185	down
ENSG00000129993	CBFA2T3	ENST00000327483;ENST00000268679;ENST00000563856;ENST00000562719;ENST00000564416;ENST00000563640;ENST00000566868;ENST00000569464;ENST00000563920;ENST00000569443;ENST00000570046	CBFA2/RUNX1 partner transcriptional co-repressor 3 [Source:HGNC Symbol;Acc:HGNC:1537]	protein_coding;retained_intron;nonsense_mediated_decay	0.536614	-0.898043	0.00107722	down
ENSG00000185753	CXorf38	ENST00000327877;ENST00000378426;ENST00000378421	chromosome X open reading frame 38 [Source:HGNC Symbol;Acc:HGNC:28589]	protein_coding	0.536618	-0.898032	0.000279266	down
ENSG00000189057	FAM111B	ENST00000343597;ENST00000620384;ENST00000529618;ENST00000534403;ENST00000411426;ENST00000528234	family with sequence similarity 111 member B [Source:HGNC Symbol;Acc:HGNC:24200]	protein_coding;retained_intron	0.537575	-0.895461	0.000703505	down
ENSG00000136492	BRIP1	ENST00000577598;ENST00000259008;ENST00000583837;ENST00000579028;ENST00000584322;ENST00000577913	BRCA1 interacting protein C-terminal helicase 1 [Source:HGNC Symbol;Acc:HGNC:20473]	protein_coding;processed_transcript;nonsense_mediated_decay	0.538327	-0.893445	5.23746e-05	down
ENSG00000213398	LCAT	ENST00000573538;ENST00000570980;ENST00000264005;ENST00000575277;ENST00000575467;ENST00000573846;ENST00000576450;ENST00000570369;ENST00000570396	lecithin-cholesterol acyltransferase [Source:HGNC Symbol;Acc:HGNC:6522]	nonsense_mediated_decay;protein_coding;retained_intron	0.538753	-0.892304	0.00831456	down
ENSG00000125170	DOK4	ENST00000566936;ENST00000569548;ENST00000564378;ENST00000562737;ENST00000569010;ENST00000566705;ENST00000562008;ENST00000569538;ENST00000561918;ENST00000561659;ENST00000340099;ENST00000567214;ENST00000566588;ENST00000569250;ENST00000567175;ENST00000568617;ENST00000567276;ENST00000563483	docking protein 4 [Source:HGNC Symbol;Acc:HGNC:19868]	protein_coding;processed_transcript;nonsense_mediated_decay;retained_intron	0.539152	-0.891235	0.00012831	down
ENSG00000106415	GLCCI1	ENST00000223145;ENST00000482540;ENST00000489405;ENST00000470583;ENST00000460897;ENST00000474269;ENST00000496617;ENST00000430798;ENST00000438949;ENST00000492797;ENST00000491947;ENST00000414914	glucocorticoid induced 1 [Source:HGNC Symbol;Acc:HGNC:18713]	protein_coding;retained_intron;processed_transcript;nonsense_mediated_decay	0.539252	-0.890968	0.000235017	down
ENSG00000085840	ORC1	ENST00000371566;ENST00000371568	origin recognition complex subunit 1 [Source:HGNC Symbol;Acc:HGNC:8487]	protein_coding	0.540115	-0.888662	0.000234569	down
ENSG00000145819	ARHGAP26	ENST00000645722;ENST00000274498;ENST00000461314;ENST00000489924;ENST00000477867;ENST00000443045;ENST00000464838;ENST00000469396;ENST00000451259;ENST00000425417;ENST00000475287;ENST00000486650;ENST00000419676;ENST00000469131;ENST00000424007;ENST00000378013;ENST00000418236;ENST00000642734;ENST00000421521;ENST00000646213;ENST00000443674;ENST00000470032;ENST00000645625	Rho GTPase activating protein 26 [Source:HGNC Symbol;Acc:HGNC:17073]	protein_coding;processed_transcript;retained_intron;nonsense_mediated_decay	0.540523	-0.887573	0.00252722	down
ENSG00000182108	DEXI	ENST00000331808;ENST00000570992;ENST00000570440;ENST00000469379	Dexi homolog [Source:HGNC Symbol;Acc:HGNC:13267]	protein_coding;processed_transcript	0.540907	-0.886549	0.00268586	down
ENSG00000095203	EPB41L4B	ENST00000374566;ENST00000374557	erythrocyte membrane protein band 4.1 like 4B [Source:HGNC Symbol;Acc:HGNC:19818]	protein_coding	0.540988	-0.886333	0.00302237	down
ENSG00000072864	NDE1	ENST00000574109;ENST00000576502;ENST00000396354;ENST00000572756;ENST00000675951;ENST00000577101;ENST00000674995;ENST00000570727;ENST00000674588;ENST00000674888;ENST00000675171;ENST00000574163;ENST00000674538;ENST00000674900;ENST00000572503;ENST00000572967;ENST00000674554;ENST00000674581;ENST00000573203;ENST00000573694;ENST00000675926;ENST00000396355	nudE neurodevelopment protein 1 [Source:HGNC Symbol;Acc:HGNC:17619]	protein_coding;nonsense_mediated_decay;retained_intron;processed_transcript	0.541472	-0.88504	0.00434421	down
ENSG00000260230	FRRS1L	ENST00000561981;ENST00000645180;ENST00000644736;ENST00000642157;ENST00000642299;ENST00000644747	ferric chelate reductase 1 like [Source:HGNC Symbol;Acc:HGNC:1362]	protein_coding;retained_intron;nonsense_mediated_decay	0.541711	-0.884405	0.000552395	down
ENSG00000106546	AHR	ENST00000242057;ENST00000645559;ENST00000463496;ENST00000492120;ENST00000475440;ENST00000481944;ENST00000642825	aryl hydrocarbon receptor [Source:HGNC Symbol;Acc:HGNC:348]	protein_coding;processed_transcript;nonsense_mediated_decay	0.541899	-0.883903	0.00366471	down
ENSG00000184500	PROS1	ENST00000394236;ENST00000650591;ENST00000649585;ENST00000348974;ENST00000648381;ENST00000488658;ENST00000647936;ENST00000407433;ENST00000648721;ENST00000472684;ENST00000649103;ENST00000648853	protein S [Source:HGNC Symbol;Acc:HGNC:9456]	protein_coding;nonsense_mediated_decay;processed_transcript;retained_intron	0.542165	-0.883196	2.60589e-05	down
ENSG00000008323	PLEKHG6	ENST00000536531;ENST00000449001;ENST00000396988;ENST00000304581;ENST00000538208;ENST00000543000;ENST00000535616;ENST00000544743;ENST00000011684	pleckstrin homology and RhoGEF domain containing G6 [Source:HGNC Symbol;Acc:HGNC:25562]	protein_coding;processed_transcript	0.542208	-0.883082	0.0193934	down
ENSG00000076864	RAP1GAP	ENST00000542643;ENST00000495204;ENST00000611549;ENST00000290101;ENST00000464457;ENST00000447293;ENST00000482984;ENST00000374757;ENST00000471600;ENST00000317967;ENST00000374761;ENST00000374765;ENST00000374763	RAP1 GTPase activating protein [Source:HGNC Symbol;Acc:HGNC:9858]	protein_coding;retained_intron;processed_transcript;nonsense_mediated_decay	0.542291	-0.88286	0.00106604	down
ENSG00000141622	RNF165	ENST00000269439;ENST00000587853;ENST00000588679;ENST00000590330;ENST00000593230;ENST00000586604;ENST00000592777;ENST00000543885	ring finger protein 165 [Source:HGNC Symbol;Acc:HGNC:31696]	protein_coding;nonsense_mediated_decay;retained_intron	0.542854	-0.881365	0.000257694	down
ENSG00000164841	TMEM74	ENST00000297459;ENST00000518838	transmembrane protein 74 [Source:HGNC Symbol;Acc:HGNC:26409]	protein_coding;processed_transcript	0.543028	-0.880901	0.00367739	down
ENSG00000119969	HELLS	ENST00000348459;ENST00000419900;ENST00000464030;ENST00000371332;ENST00000630929;ENST00000394036;ENST00000466552;ENST00000371327;ENST00000394045;ENST00000239026;ENST00000462057;ENST00000475263	helicase, lymphoid specific [Source:HGNC Symbol;Acc:HGNC:4861]	protein_coding;retained_intron;processed_transcript	0.543181	-0.880494	0.000275795	down
ENSG00000177189	RPS6KA3	ENST00000379565;ENST00000644893;ENST00000645270;ENST00000646610;ENST00000643085;ENST00000643073;ENST00000457145;ENST00000643337;ENST00000644368;ENST00000647265;ENST00000474266;ENST00000645268;ENST00000438357;ENST00000479809;ENST00000642835;ENST00000643402	ribosomal protein S6 kinase A3 [Source:HGNC Symbol;Acc:HGNC:10432]	protein_coding;nonsense_mediated_decay;retained_intron	0.543237	-0.880345	1.81571e-06	down
ENSG00000116661	FBXO2	ENST00000354287;ENST00000466919;ENST00000465901;ENST00000471501;ENST00000642025;ENST00000475961	F-box protein 2 [Source:HGNC Symbol;Acc:HGNC:13581]	protein_coding;retained_intron;nonsense_mediated_decay;processed_transcript	0.543353	-0.880037	0.00249606	down
ENSG00000157045	NTAN1	ENST00000287706;ENST00000566542;ENST00000565187;ENST00000622833;ENST00000568738;ENST00000624579;ENST00000567030;ENST00000570292;ENST00000568320;ENST00000567420;ENST00000563940;ENST00000566419	N-terminal asparagine amidase [Source:HGNC Symbol;Acc:HGNC:29909]	protein_coding;retained_intron;nonsense_mediated_decay	0.543512	-0.879616	0.000557528	down
ENSG00000077080	ACTL6B	ENST00000160382;ENST00000487125;ENST00000485601;ENST00000461605;ENST00000489904;ENST00000487225	actin like 6B [Source:HGNC Symbol;Acc:HGNC:160]	protein_coding;retained_intron	0.544406	-0.877245	0.016366	down
ENSG00000149115	TNKS1BP1	ENST00000527207;ENST00000530920;ENST00000427750;ENST00000532437;ENST00000358252;ENST00000528882;ENST00000532273	tankyrase 1 binding protein 1 [Source:HGNC Symbol;Acc:HGNC:19081]	protein_coding;retained_intron;nonsense_mediated_decay	0.544448	-0.877135	7.36333e-07	down
ENSG00000244509	APOBEC3C	ENST00000361441;ENST00000428892	apolipoprotein B mRNA editing enzyme catalytic subunit 3C [Source:HGNC Symbol;Acc:HGNC:17353]	protein_coding;nonsense_mediated_decay	0.544466	-0.877085	0.00233324	down
ENSG00000174951	FUT1	ENST00000310160;ENST00000645652;ENST00000597220;ENST00000601988;ENST00000643950;ENST00000601931;ENST00000599826	fucosyltransferase 1 (H blood group) [Source:HGNC Symbol;Acc:HGNC:4012]	protein_coding;processed_transcript	0.544484	-0.877038	0.0183131	down
ENSG00000180354	MTURN	ENST00000324453;ENST00000434060;ENST00000324489;ENST00000409688	maturin, neural progenitor differentiation regulator homolog [Source:HGNC Symbol;Acc:HGNC:25457]	protein_coding	0.544529	-0.87692	0.0489818	down
ENSG00000101489	CELF4	ENST00000591282;ENST00000588591;ENST00000591287;ENST00000601392;ENST00000420428;ENST00000590011;ENST00000334919;ENST00000588597;ENST00000590112;ENST00000587924;ENST00000587819;ENST00000591421;ENST00000361795;ENST00000589386;ENST00000586009;ENST00000587657;ENST00000589229;ENST00000601019;ENST00000587449;ENST00000603232;ENST00000587074;ENST00000593271;ENST00000587911	CUGBP Elav-like family member 4 [Source:HGNC Symbol;Acc:HGNC:14015]	protein_coding;processed_transcript;nonsense_mediated_decay;retained_intron	0.545217	-0.875098	0.0016242	down
ENSG00000176973	FAM89B	ENST00000530349;ENST00000316409;ENST00000449319	family with sequence similarity 89 member B [Source:HGNC Symbol;Acc:HGNC:16708]	protein_coding	0.545227	-0.875072	4.68728e-05	down
ENSG00000177606	JUN	ENST00000371222	Jun proto-oncogene, AP-1 transcription factor subunit [Source:HGNC Symbol;Acc:HGNC:6204]	protein_coding	0.545417	-0.874569	8.58909e-07	down
ENSG00000012211	PRICKLE3	ENST00000599218;ENST00000453382;ENST00000376317;ENST00000540849;ENST00000611313;ENST00000614014;ENST00000432913;ENST00000376310	prickle planar cell polarity protein 3 [Source:HGNC Symbol;Acc:HGNC:6645]	protein_coding;nonsense_mediated_decay;retained_intron	0.545707	-0.873803	0.0297042	down
ENSG00000138180	CEP55	ENST00000371485;ENST00000496302;ENST00000445435	centrosomal protein 55 [Source:HGNC Symbol;Acc:HGNC:1161]	protein_coding;processed_transcript	0.545778	-0.873613	0.000411313	down
ENSG00000183307	TMEM121B	ENST00000331437;ENST00000399875	transmembrane protein 121B [Source:HGNC Symbol;Acc:HGNC:1844]	protein_coding	0.545934	-0.873202	0.000159401	down
ENSG00000187323	DCC	ENST00000581580;ENST00000442544;ENST00000412726;ENST00000582595;ENST00000579702;ENST00000578080;ENST00000577224;ENST00000580024;ENST00000579941;ENST00000579349;ENST00000582875;ENST00000304775;ENST00000581559;ENST00000584710;ENST00000580146;ENST00000579666;ENST00000578949;ENST00000579883	DCC netrin 1 receptor [Source:HGNC Symbol;Acc:HGNC:2701]	protein_coding;processed_transcript;retained_intron;nonsense_mediated_decay	0.546329	-0.872158	0.00113531	down
ENSG00000010818	HIVEP2	ENST00000012134;ENST00000367604;ENST00000421237;ENST00000474532;ENST00000367603	HIVEP zinc finger 2 [Source:HGNC Symbol;Acc:HGNC:4921]	protein_coding;processed_transcript	0.546606	-0.871426	1.81571e-06	down
ENSG00000143013	LMO4	ENST00000370544;ENST00000370542;ENST00000489303;ENST00000495705	LIM domain only 4 [Source:HGNC Symbol;Acc:HGNC:6644]	protein_coding;processed_transcript	0.546608	-0.871421	1.47173e-06	down
ENSG00000136982	DSCC1	ENST00000313655;ENST00000521795	DNA replication and sister chromatid cohesion 1 [Source:HGNC Symbol;Acc:HGNC:24453]	protein_coding;retained_intron	0.546668	-0.871264	0.000802181	down
ENSG00000105894	PTN	ENST00000348225;ENST00000393083	pleiotrophin [Source:HGNC Symbol;Acc:HGNC:9630]	protein_coding	0.546678	-0.871237	2.93686e-06	down
ENSG00000137812	KNL1	ENST00000399668;ENST00000533001;ENST00000346991;ENST00000532056;ENST00000528975;ENST00000534204;ENST00000532347;ENST00000532406;ENST00000531626;ENST00000526913;ENST00000527044;ENST00000528967;ENST00000614337	kinetochore scaffold 1 [Source:HGNC Symbol;Acc:HGNC:24054]	protein_coding;retained_intron;nonsense_mediated_decay;processed_transcript	0.546711	-0.871149	5.25597e-05	down
ENSG00000143032	BARHL2	ENST00000370445	BarH like homeobox 2 [Source:HGNC Symbol;Acc:HGNC:954]	protein_coding	0.546748	-0.871053	0.0133439	down
ENSG00000235162	C12orf75	ENST00000443585;ENST00000548336;ENST00000549893;ENST00000549934;ENST00000548458;ENST00000546866;ENST00000612117;ENST00000552457	chromosome 12 open reading frame 75 [Source:HGNC Symbol;Acc:HGNC:35164]	protein_coding;processed_transcript;retained_intron	0.547067	-0.870211	0.0260474	down
ENSG00000092445	TYRO3	ENST00000263798;ENST00000568490;ENST00000560992;ENST00000568343;ENST00000559851;ENST00000560227;ENST00000560162;ENST00000559066;ENST00000559815	TYRO3 protein tyrosine kinase [Source:HGNC Symbol;Acc:HGNC:12446]	protein_coding;retained_intron;nonsense_mediated_decay	0.547198	-0.869865	6.07114e-07	down
ENSG00000152253	SPC25	ENST00000282074;ENST00000451987;ENST00000479309;ENST00000472216	SPC25 component of NDC80 kinetochore complex [Source:HGNC Symbol;Acc:HGNC:24031]	protein_coding;processed_transcript	0.547383	-0.869378	0.00408426	down
ENSG00000213420	GPC2	ENST00000292377;ENST00000471717;ENST00000486702;ENST00000480087;ENST00000490629	glypican 2 [Source:HGNC Symbol;Acc:HGNC:4450]	protein_coding;retained_intron;nonsense_mediated_decay;processed_transcript	0.547493	-0.869087	1.95882e-05	down
ENSG00000171786	NHLH1	ENST00000302101	nescient helix-loop-helix 1 [Source:HGNC Symbol;Acc:HGNC:7817]	protein_coding	0.547633	-0.868719	2.47591e-05	down
ENSG00000177576	C18orf32	ENST00000318240;ENST00000613385;ENST00000582392	chromosome 18 open reading frame 32 [Source:HGNC Symbol;Acc:HGNC:31690]	protein_coding	0.548399	-0.866701	0.00618959	down
ENSG00000115306	SPTBN1	ENST00000467371;ENST00000333896;ENST00000615901;ENST00000496323;ENST00000356805;ENST00000389980;ENST00000602898	spectrin beta, non-erythrocytic 1 [Source:HGNC Symbol;Acc:HGNC:11275]	retained_intron;protein_coding	0.548557	-0.866288	1.32121e-07	down
ENSG00000145365	TIFA	ENST00000361717;ENST00000500655	TRAF interacting protein with forkhead associated domain [Source:HGNC Symbol;Acc:HGNC:19075]	protein_coding	0.548714	-0.865874	0.0312393	down
ENSG00000054967	RELT	ENST00000545886;ENST00000064780;ENST00000539134;ENST00000545687;ENST00000537771;ENST00000393580;ENST00000544075	RELT TNF receptor [Source:HGNC Symbol;Acc:HGNC:13764]	retained_intron;protein_coding;nonsense_mediated_decay	0.548906	-0.865368	0.00440229	down
ENSG00000073803	MAP3K13	ENST00000265026;ENST00000448876;ENST00000455188;ENST00000477582;ENST00000420577;ENST00000428617;ENST00000433092;ENST00000443863;ENST00000439882;ENST00000447637;ENST00000438053;ENST00000454237;ENST00000438798;ENST00000424227;ENST00000446828	mitogen-activated protein kinase kinase kinase 13 [Source:HGNC Symbol;Acc:HGNC:6852]	protein_coding;nonsense_mediated_decay;retained_intron	0.549171	-0.864672	0.000130697	down
ENSG00000197472	ZNF695	ENST00000339986;ENST00000366504;ENST00000491337;ENST00000479214;ENST00000498046;ENST00000487338	zinc finger protein 695 [Source:HGNC Symbol;Acc:HGNC:30954]	protein_coding;nonsense_mediated_decay;processed_transcript	0.549236	-0.864503	0.0266329	down
ENSG00000134809	TIMM10	ENST00000525158;ENST00000257245;ENST00000525587	translocase of inner mitochondrial membrane 10 [Source:HGNC Symbol;Acc:HGNC:11814]	protein_coding	0.549592	-0.863568	0.00338448	down
ENSG00000135063	FAM189A2	ENST00000645123;ENST00000645516;ENST00000460871;ENST00000303068;ENST00000469179;ENST00000377216;ENST00000257515;ENST00000455972;ENST00000643727	family with sequence similarity 189 member A2 [Source:HGNC Symbol;Acc:HGNC:24820]	retained_intron;processed_transcript;protein_coding;nonsense_mediated_decay	0.549784	-0.863063	0.00258763	down
ENSG00000161800	RACGAP1	ENST00000551016;ENST00000454520;ENST00000312377;ENST00000548158;ENST00000547061;ENST00000552004;ENST00000546723;ENST00000550149;ENST00000552310;ENST00000546595;ENST00000551260;ENST00000552157;ENST00000548824;ENST00000551145;ENST00000549777;ENST00000548961;ENST00000546786;ENST00000549342;ENST00000427314;ENST00000547905;ENST00000548247;ENST00000550651;ENST00000548598;ENST00000548320;ENST00000546764…	Rac GTPase activating protein 1 [Source:HGNC Symbol;Acc:HGNC:9804]	protein_coding;retained_intron;processed_transcript;nonsense_mediated_decay	0.550218	-0.861924	9.56101e-06	down
ENSG00000162882	HAAO	ENST00000294973;ENST00000406924;ENST00000402268;ENST00000431905;ENST00000406007;ENST00000404451;ENST00000402698	3-hydroxyanthranilate 3,4-dioxygenase [Source:HGNC Symbol;Acc:HGNC:4796]	protein_coding;retained_intron	0.550304	-0.8617	0.0450007	down
ENSG00000144834	TAGLN3	ENST00000455401;ENST00000478951;ENST00000273368;ENST00000393917;ENST00000469385;ENST00000494932;ENST00000486460	transgelin 3 [Source:HGNC Symbol;Acc:HGNC:29868]	protein_coding	0.550383	-0.861491	3.18662e-05	down
ENSG00000117632	STMN1	ENST00000357865;ENST00000426559;ENST00000399728;ENST00000446334;ENST00000513116;ENST00000485226;ENST00000374291;ENST00000465604;ENST00000455785	stathmin 1 [Source:HGNC Symbol;Acc:HGNC:6510]	protein_coding;processed_transcript	0.550489	-0.861215	6.54254e-08	down
ENSG00000145920	CPLX2	ENST00000393745;ENST00000359546;ENST00000512824;ENST00000509837;ENST00000506642;ENST00000515094;ENST00000515502;ENST00000515025;ENST00000514150;ENST00000502265	complexin 2 [Source:HGNC Symbol;Acc:HGNC:2310]	protein_coding;processed_transcript	0.550543	-0.861073	0.0012487	down
ENSG00000118689	FOXO3	ENST00000406360;ENST00000343882;ENST00000540898	forkhead box O3 [Source:HGNC Symbol;Acc:HGNC:3821]	protein_coding	0.550549	-0.861058	7.50888e-07	down
ENSG00000142627	EPHA2	ENST00000461614;ENST00000358432;ENST00000462805;ENST00000480202	EPH receptor A2 [Source:HGNC Symbol;Acc:HGNC:3386]	processed_transcript;protein_coding	0.550641	-0.860816	9.85431e-06	down
ENSG00000070159	PTPN3	ENST00000374541;ENST00000446349;ENST00000412145;ENST00000447271;ENST00000262539;ENST00000497739	protein tyrosine phosphatase non-receptor type 3 [Source:HGNC Symbol;Acc:HGNC:9655]	protein_coding;processed_transcript	0.550782	-0.860446	0.00181276	down
ENSG00000196739	COL27A1	ENST00000494090;ENST00000356083;ENST00000485397;ENST00000451716;ENST00000490831;ENST00000494780;ENST00000477421;ENST00000468565	collagen type XXVII alpha 1 chain [Source:HGNC Symbol;Acc:HGNC:22986]	nonsense_mediated_decay;protein_coding;retained_intron;processed_transcript	0.550904	-0.860127	0.00112955	down
ENSG00000136383	ALPK3	ENST00000258888;ENST00000558077	alpha kinase 3 [Source:HGNC Symbol;Acc:HGNC:17574]	protein_coding;retained_intron	0.551344	-0.858977	1.4071e-07	down
ENSG00000117399	CDC20	ENST00000310955;ENST00000372462;ENST00000478882;ENST00000482046	cell division cycle 20 [Source:HGNC Symbol;Acc:HGNC:1723]	protein_coding;processed_transcript	0.5514	-0.858829	1.29012e-06	down
ENSG00000166501	PRKCB	ENST00000643927;ENST00000321728;ENST00000487674;ENST00000486868;ENST00000498739;ENST00000482000;ENST00000463752;ENST00000647422;ENST00000645517;ENST00000498058;ENST00000472066;ENST00000466124	protein kinase C beta [Source:HGNC Symbol;Acc:HGNC:9395]	protein_coding;retained_intron;processed_transcript	0.551915	-0.857481	1.64714e-05	down
ENSG00000180573	H2AC6	ENST00000314088;ENST00000602637;ENST00000377791	H2A clustered histone 6 [Source:HGNC Symbol;Acc:HGNC:4733]	nonsense_mediated_decay;protein_coding	0.552276	-0.856537	0.0441299	down
ENSG00000128596	CCDC136	ENST00000494552;ENST00000464832;ENST00000297788;ENST00000378685;ENST00000460941;ENST00000528772;ENST00000485832;ENST00000471729;ENST00000480137;ENST00000459946;ENST00000488925;ENST00000464672;ENST00000485998;ENST00000487361;ENST00000472049	coiled-coil domain containing 136 [Source:HGNC Symbol;Acc:HGNC:22225]	protein_coding;retained_intron;processed_transcript	0.55244	-0.85611	0.000424613	down
ENSG00000086717	PPEF1	ENST00000379962;ENST00000486029;ENST00000496616;ENST00000361511;ENST00000471570;ENST00000349874;ENST00000496075;ENST00000472826;ENST00000470157	protein phosphatase with EF-hand domain 1 [Source:HGNC Symbol;Acc:HGNC:9243]	retained_intron;processed_transcript;protein_coding	0.55295	-0.854778	0.00918751	down
ENSG00000014914	MTMR11	ENST00000482025;ENST00000495054;ENST00000490310;ENST00000492824;ENST00000439741;ENST00000466496;ENST00000482343;ENST00000369140;ENST00000479272;ENST00000493562	myotubularin related protein 11 [Source:HGNC Symbol;Acc:HGNC:24307]	retained_intron;protein_coding;processed_transcript	0.553156	-0.854242	0.0115849	down
ENSG00000125319	HROB	ENST00000585683;ENST00000588073;ENST00000588434;ENST00000245382;ENST00000319977	homologous recombination factor with OB-fold [Source:HGNC Symbol;Acc:HGNC:28460]	protein_coding;retained_intron	0.553284	-0.853907	0.00409968	down
ENSG00000134259	NGF	ENST00000369512;ENST00000675637;ENST00000676038	nerve growth factor [Source:HGNC Symbol;Acc:HGNC:7808]	protein_coding	0.55351	-0.853318	0.0159905	down
ENSG00000167654	ATCAY	ENST00000597739;ENST00000450849;ENST00000600960;ENST00000598136;ENST00000595916;ENST00000601323	ATCAY kinesin light chain interacting caytaxin [Source:HGNC Symbol;Acc:HGNC:779]	nonsense_mediated_decay;protein_coding;processed_transcript	0.554085	-0.85182	4.03497e-05	down
ENSG00000156675	RAB11FIP1	ENST00000287263;ENST00000330843;ENST00000523182;ENST00000522774;ENST00000524118;ENST00000522727	RAB11 family interacting protein 1 [Source:HGNC Symbol;Acc:HGNC:30265]	protein_coding;processed_transcript;retained_intron	0.554212	-0.851491	1.16641e-06	down
ENSG00000122574	WIPF3	ENST00000409290;ENST00000242140;ENST00000409123	WAS/WASL interacting protein family member 3 [Source:HGNC Symbol;Acc:HGNC:22004]	protein_coding	0.554244	-0.851407	0.0138983	down
ENSG00000102100	SLC35A2	ENST00000616181;ENST00000376521;ENST00000247138;ENST00000445167;ENST00000376529;ENST00000635015;ENST00000452555;ENST00000413561;ENST00000634461;ENST00000376515;ENST00000376512;ENST00000635460;ENST00000635238;ENST00000446885;ENST00000635628;ENST00000634665;ENST00000635285;ENST00000635589	solute carrier family 35 member A2 [Source:HGNC Symbol;Acc:HGNC:11022]	protein_coding;nonsense_mediated_decay	0.554397	-0.85101	0.000263757	down
ENSG00000105409	ATP1A3	ENST00000545399;ENST00000648268;ENST00000441343;ENST00000636282;ENST00000602133;ENST00000473086;ENST00000485672;ENST00000636197;ENST00000468774;ENST00000465007;ENST00000543770;ENST00000636258;ENST00000645448;ENST00000637406	ATPase Na+/K+ transporting subunit alpha 3 [Source:HGNC Symbol;Acc:HGNC:801]	protein_coding;non_stop_decay;processed_transcript;retained_intron	0.554478	-0.850797	0.000257078	down
ENSG00000197822	OCLN	ENST00000355237;ENST00000396442;ENST00000538151;ENST00000510666;ENST00000514370	occludin [Source:HGNC Symbol;Acc:HGNC:8104]	protein_coding;retained_intron;processed_transcript	0.554553	-0.850604	0.000316171	down
ENSG00000258986	TMEM179	ENST00000556573;ENST00000341595;ENST00000616017;ENST00000615704;ENST00000556320;ENST00000415614	transmembrane protein 179 [Source:HGNC Symbol;Acc:HGNC:20137]	protein_coding	0.554672	-0.850293	0.00389852	down
ENSG00000137841	PLCB2	ENST00000559381;ENST00000260402;ENST00000558588;ENST00000561378;ENST00000543785;ENST00000559634;ENST00000456256;ENST00000558409;ENST00000559671;ENST00000560701;ENST00000557821;ENST00000559618;ENST00000560009;ENST00000558505;ENST00000560093	phospholipase C beta 2 [Source:HGNC Symbol;Acc:HGNC:9055]	retained_intron;protein_coding;nonsense_mediated_decay	0.554703	-0.850214	0.0328492	down
ENSG00000077279	DCX	ENST00000371993;ENST00000635795;ENST00000636381;ENST00000637570;ENST00000637453;ENST00000636035;ENST00000468911;ENST00000358070;ENST00000356220;ENST00000488120;ENST00000496551	doublecortin [Source:HGNC Symbol;Acc:HGNC:2714]	protein_coding	0.555893	-0.84712	4.87603e-06	down
ENSG00000005801	ZNF195	ENST00000526601;ENST00000649622;ENST00000005082;ENST00000354599;ENST00000528218;ENST00000330692;ENST00000524857;ENST00000429541;ENST00000526540;ENST00000343338;ENST00000526598;ENST00000529085;ENST00000528410;ENST00000534569;ENST00000618467;ENST00000620374;ENST00000427810;ENST00000529789;ENST00000399602;ENST00000528636;ENST00000530643;ENST00000529678;ENST00000438262;ENST00000525502;ENST00000527386…	zinc finger protein 195 [Source:HGNC Symbol;Acc:HGNC:12986]	protein_coding;retained_intron;nonsense_mediated_decay;processed_transcript	0.555984	-0.846885	0.00416822	down
ENSG00000134109	EDEM1	ENST00000256497;ENST00000492751;ENST00000443790;ENST00000434243;ENST00000465369;ENST00000465187;ENST00000445686	ER degradation enhancing alpha-mannosidase like protein 1 [Source:HGNC Symbol;Acc:HGNC:18967]	protein_coding;retained_intron;nonsense_mediated_decay	0.556012	-0.846811	6.69376e-05	down
ENSG00000180817	PPA1	ENST00000373232;ENST00000495346;ENST00000625364;ENST00000460755;ENST00000373230;ENST00000610026	inorganic pyrophosphatase 1 [Source:HGNC Symbol;Acc:HGNC:9226]	protein_coding;processed_transcript;retained_intron;nonsense_mediated_decay	0.556179	-0.84638	2.83993e-06	down
ENSG00000109323	MANBA	ENST00000646727;ENST00000647129;ENST00000647097;ENST00000646451;ENST00000514430;ENST00000646311;ENST00000644965;ENST00000505239;ENST00000511813;ENST00000508141;ENST00000506478;ENST00000644159;ENST00000645348;ENST00000644545;ENST00000645558;ENST00000642252;ENST00000507358	mannosidase beta [Source:HGNC Symbol;Acc:HGNC:6831]	nonsense_mediated_decay;protein_coding;retained_intron	0.55622	-0.846273	3.06302e-05	down
ENSG00000137804	NUSAP1	ENST00000560177;ENST00000560747;ENST00000560318;ENST00000668273;ENST00000260359;ENST00000414849;ENST00000558123;ENST00000559596;ENST00000450592;ENST00000558582;ENST00000559046;ENST00000560898;ENST00000559659;ENST00000557840	nucleolar and spindle associated protein 1 [Source:HGNC Symbol;Acc:HGNC:18538]	protein_coding;retained_intron;processed_transcript;nonsense_mediated_decay	0.556465	-0.845636	4.72069e-05	down
ENSG00000221926	TRIM16	ENST00000416464;ENST00000649191;ENST00000577886;ENST00000581224;ENST00000582182;ENST00000473540;ENST00000579535;ENST00000494759;ENST00000579219;ENST00000336708;ENST00000578744;ENST00000579272;ENST00000577326;ENST00000473659;ENST00000460728;ENST00000578237;ENST00000473368;ENST00000577372;ENST00000582708;ENST00000579843;ENST00000581200;ENST00000580388;ENST00000580110;ENST00000584142;ENST00000579630…	tripartite motif containing 16 [Source:HGNC Symbol;Acc:HGNC:17241]	protein_coding;processed_transcript;nonsense_mediated_decay;retained_intron	0.556518	-0.8455	0.000590012	down
ENSG00000197989	SNHG12	ENST00000481368;ENST00000650239;ENST00000481220;ENST00000648327;ENST00000474814;ENST00000461448;ENST00000464115;ENST00000483436;ENST00000648251;ENST00000650259;ENST00000464612;ENST00000475441;ENST00000470977;ENST00000488745;ENST00000648127;ENST00000461832;ENST00000531126	small nucleolar RNA host gene 12 [Source:HGNC Symbol;Acc:HGNC:30062]	retained_intron;lncRNA	0.557037	-0.844155	0.0156726	down
ENSG00000160957	RECQL4	ENST00000617875;ENST00000534626;ENST00000621189;ENST00000534270;ENST00000532846;ENST00000301323;ENST00000524998;ENST00000534538;ENST00000531875;ENST00000529424	RecQ like helicase 4 [Source:HGNC Symbol;Acc:HGNC:9949]	protein_coding;retained_intron;nonsense_mediated_decay;processed_transcript	0.557279	-0.843528	0.00022322	down
ENSG00000005810	MYCBP2	ENST00000544440;ENST00000462987;ENST00000429715;ENST00000482517;ENST00000612956;ENST00000466564;ENST00000498073;ENST00000474882;ENST00000485061;ENST00000486679;ENST00000357337;ENST00000491491	MYC binding protein 2 [Source:HGNC Symbol;Acc:HGNC:23386]	protein_coding;processed_transcript	0.55736	-0.843318	3.03277e-06	down
ENSG00000135447	PPP1R1A	ENST00000553113;ENST00000257905;ENST00000547431;ENST00000547826	protein phosphatase 1 regulatory inhibitor subunit 1A [Source:HGNC Symbol;Acc:HGNC:9286]	protein_coding;nonsense_mediated_decay	0.557557	-0.842808	0.000243143	down
ENSG00000099814	CEP170B	ENST00000453495;ENST00000556508;ENST00000414716;ENST00000251181	centrosomal protein 170B [Source:HGNC Symbol;Acc:HGNC:20362]	protein_coding;retained_intron	0.557648	-0.842574	7.9445e-07	down
ENSG00000158292	GPR153	ENST00000377893	G protein-coupled receptor 153 [Source:HGNC Symbol;Acc:HGNC:23618]	protein_coding	0.558029	-0.841588	0.000633896	down
ENSG00000184368	MAP7D2	ENST00000379651;ENST00000379643;ENST00000466145;ENST00000443379;ENST00000452324	MAP7 domain containing 2 [Source:HGNC Symbol;Acc:HGNC:25899]	protein_coding;processed_transcript	0.558159	-0.841251	0.00116699	down
ENSG00000160326	SLC2A6	ENST00000485978;ENST00000371897;ENST00000371899;ENST00000414172;ENST00000432868	solute carrier family 2 member 6 [Source:HGNC Symbol;Acc:HGNC:11011]	processed_transcript;protein_coding	0.558234	-0.841059	0.0079824	down
ENSG00000053254	FOXN3	ENST00000615335;ENST00000345097;ENST00000553840;ENST00000555010;ENST00000555353;ENST00000557718;ENST00000261302;ENST00000555855;ENST00000557258;ENST00000557261;ENST00000553353;ENST00000556916;ENST00000554005;ENST00000553904;ENST00000555658;ENST00000557496;ENST00000556541;ENST00000557572;ENST00000555034	forkhead box N3 [Source:HGNC Symbol;Acc:HGNC:1928]	protein_coding;processed_transcript;nonsense_mediated_decay	0.55827	-0.840964	2.64181e-06	down
ENSG00000115884	SDC1	ENST00000254351;ENST00000381150;ENST00000403076;ENST00000447124;ENST00000482879;ENST00000429035	syndecan 1 [Source:HGNC Symbol;Acc:HGNC:10658]	protein_coding;nonsense_mediated_decay;processed_transcript	0.558312	-0.840857	0.000203479	down
ENSG00000132938	MTUS2	ENST00000380808;ENST00000612955;ENST00000542829;ENST00000467990;ENST00000255289;ENST00000400542	microtubule associated scaffold protein 2 [Source:HGNC Symbol;Acc:HGNC:20595]	protein_coding;retained_intron;processed_transcript	0.558466	-0.840458	0.000665901	down
ENSG00000106069	CHN2	ENST00000222792;ENST00000412711;ENST00000439711;ENST00000433720;ENST00000409964;ENST00000482820;ENST00000461824;ENST00000409922;ENST00000467441;ENST00000478128;ENST00000483081;ENST00000409041;ENST00000495789;ENST00000474070;ENST00000412536;ENST00000491856;ENST00000439384;ENST00000424025;ENST00000446446;ENST00000493906;ENST00000470261;ENST00000410098;ENST00000409350;ENST00000421775	chimerin 2 [Source:HGNC Symbol;Acc:HGNC:1944]	protein_coding;processed_transcript;nonsense_mediated_decay;retained_intron	0.558704	-0.839845	0.000246137	down
ENSG00000122042	UBL3	ENST00000380680	ubiquitin like 3 [Source:HGNC Symbol;Acc:HGNC:12504]	protein_coding	0.559562	-0.83763	1.01837e-06	down
ENSG00000106367	AP1S1	ENST00000429457;ENST00000646950;ENST00000337619;ENST00000643104;ENST00000646560;ENST00000443943	adaptor related protein complex 1 subunit sigma 1 [Source:HGNC Symbol;Acc:HGNC:559]	protein_coding;nonsense_mediated_decay;processed_transcript	0.560011	-0.836473	5.51577e-06	down
ENSG00000070540	WIPI1	ENST00000262139;ENST00000587731;ENST00000546360;ENST00000591744;ENST00000590402;ENST00000591494;ENST00000589316;ENST00000586815;ENST00000589459;ENST00000592645;ENST00000585393	WD repeat domain, phosphoinositide interacting 1 [Source:HGNC Symbol;Acc:HGNC:25471]	protein_coding;retained_intron;processed_transcript;nonsense_mediated_decay	0.560453	-0.835336	0.000129072	down
ENSG00000156103	MMP16	ENST00000286614;ENST00000520568;ENST00000544227;ENST00000522726	matrix metallopeptidase 16 [Source:HGNC Symbol;Acc:HGNC:7162]	protein_coding;retained_intron;processed_transcript	0.560934	-0.834097	0.00027317	down
ENSG00000152128	TMEM163	ENST00000281924;ENST00000476823;ENST00000467316	transmembrane protein 163 [Source:HGNC Symbol;Acc:HGNC:25380]	protein_coding;retained_intron	0.560984	-0.83397	0.00408231	down
ENSG00000188522	FAM83G	ENST00000399096;ENST00000388995;ENST00000345041;ENST00000580115	family with sequence similarity 83 member G [Source:HGNC Symbol;Acc:HGNC:32554]	retained_intron;protein_coding	0.561041	-0.833823	0.000316235	down
ENSG00000276644	DACH1	ENST00000619232;ENST00000613252;ENST00000611519;ENST00000620444	dachshund family transcription factor 1 [Source:HGNC Symbol;Acc:HGNC:2663]	protein_coding	0.561256	-0.833268	0.000221718	down
ENSG00000148408	CACNA1B	ENST00000371363;ENST00000371372;ENST00000371357;ENST00000277549;ENST00000371355;ENST00000277551;ENST00000413253	calcium voltage-gated channel subunit alpha1 B [Source:HGNC Symbol;Acc:HGNC:1389]	protein_coding	0.561353	-0.833019	0.00244386	down
ENSG00000184436	THAP7	ENST00000471073;ENST00000476667;ENST00000498406;ENST00000488975;ENST00000471723;ENST00000399133;ENST00000215742;ENST00000466670	THAP domain containing 7 [Source:HGNC Symbol;Acc:HGNC:23190]	retained_intron;protein_coding	0.561354	-0.833016	0.0155142	down
ENSG00000075142	SRI	ENST00000265729;ENST00000431660;ENST00000486860;ENST00000472930;ENST00000419179;ENST00000394641;ENST00000489079;ENST00000490437;ENST00000488015;ENST00000457606	sorcin [Source:HGNC Symbol;Acc:HGNC:11292]	protein_coding;retained_intron;nonsense_mediated_decay	0.561411	-0.832871	3.89435e-06	down
ENSG00000145423	SFRP2	ENST00000274063	secreted frizzled related protein 2 [Source:HGNC Symbol;Acc:HGNC:10777]	protein_coding	0.561503	-0.832635	6.04805e-05	down
ENSG00000092871	RFFL	ENST00000315249;ENST00000584655;ENST00000394597;ENST00000415395;ENST00000447669;ENST00000584541;ENST00000581039;ENST00000414419;ENST00000582308;ENST00000581265;ENST00000413582;ENST00000580569	ring finger and FYVE like domain containing E3 ubiquitin protein ligase [Source:HGNC Symbol;Acc:HGNC:24821]	protein_coding;processed_transcript;nonsense_mediated_decay	0.561689	-0.832158	0.00222752	down
ENSG00000133112	TPT1	ENST00000379056;ENST00000379055;ENST00000530705;ENST00000309246;ENST00000484604;ENST00000530245;ENST00000490277;ENST00000616577;ENST00000379060;ENST00000528619;ENST00000529421;ENST00000533567;ENST00000527226;ENST00000442760	tumor protein, translationally-controlled 1 [Source:HGNC Symbol;Acc:HGNC:12022]	protein_coding;retained_intron;processed_transcript	0.561792	-0.831892	0.000484964	down
ENSG00000163291	PAQR3	ENST00000515853;ENST00000512733;ENST00000395594;ENST00000515541;ENST00000503343;ENST00000512299;ENST00000342820;ENST00000512760;ENST00000508599;ENST00000505735;ENST00000511594;ENST00000505715	progestin and adipoQ receptor family member 3 [Source:HGNC Symbol;Acc:HGNC:30130]	nonsense_mediated_decay;protein_coding;processed_transcript;retained_intron	0.561925	-0.83155	4.53726e-06	down
ENSG00000164023	SGMS2	ENST00000394684;ENST00000504754;ENST00000394686;ENST00000506462;ENST00000515332;ENST00000503385;ENST00000503862;ENST00000506993;ENST00000359079	sphingomyelin synthase 2 [Source:HGNC Symbol;Acc:HGNC:28395]	protein_coding;processed_transcript	0.561926	-0.831547	0.0140052	down
ENSG00000196581	AJAP1	ENST00000378190;ENST00000378191;ENST00000466761	adherens junctions associated protein 1 [Source:HGNC Symbol;Acc:HGNC:30801]	protein_coding;processed_transcript	0.561958	-0.831466	0.000587165	down
ENSG00000100345	MYH9	ENST00000216181;ENST00000486218;ENST00000459960;ENST00000472210;ENST00000495928;ENST00000463027;ENST00000401701;ENST00000473022;ENST00000456729;ENST00000475726;ENST00000477189	myosin heavy chain 9 [Source:HGNC Symbol;Acc:HGNC:7579]	protein_coding;retained_intron;processed_transcript	0.562076	-0.831162	1.49358e-06	down
ENSG00000183963	SMTN	ENST00000489337;ENST00000460658;ENST00000333137;ENST00000472911;ENST00000426927;ENST00000416786;ENST00000347557;ENST00000422839;ENST00000431481;ENST00000482444;ENST00000440425;ENST00000438223;ENST00000612341;ENST00000475548;ENST00000358743;ENST00000504335;ENST00000432777;ENST00000497697;ENST00000404574;ENST00000493335;ENST00000624247;ENST00000619644;ENST00000466272;ENST00000455608	smoothelin [Source:HGNC Symbol;Acc:HGNC:11126]	retained_intron;protein_coding;processed_transcript	0.562226	-0.830777	0.00160773	down
ENSG00000144395	CCDC150	ENST00000487663;ENST00000431807;ENST00000495513;ENST00000389175;ENST00000471546;ENST00000461825;ENST00000497159;ENST00000448409;ENST00000471033;ENST00000465092;ENST00000409270;ENST00000469429;ENST00000463826;ENST00000460114;ENST00000498512;ENST00000494389;ENST00000483877;ENST00000424427;ENST00000461243	coiled-coil domain containing 150 [Source:HGNC Symbol;Acc:HGNC:26834]	processed_transcript;nonsense_mediated_decay;protein_coding;retained_intron	0.562407	-0.830313	0.00526987	down
ENSG00000125744	RTN2	ENST00000590526;ENST00000591286;ENST00000344680;ENST00000587597;ENST00000430715;ENST00000592064;ENST00000245923;ENST00000593129;ENST00000591789;ENST00000588036;ENST00000589628;ENST00000590746;ENST00000589384;ENST00000593187	reticulon 2 [Source:HGNC Symbol;Acc:HGNC:10468]	protein_coding;nonsense_mediated_decay;retained_intron;processed_transcript	0.562685	-0.829601	0.000645611	down
ENSG00000067208	EVI5	ENST00000370331;ENST00000540033;ENST00000491940;ENST00000492513;ENST00000474806;ENST00000492613;ENST00000468580;ENST00000466778	ecotropic viral integration site 5 [Source:HGNC Symbol;Acc:HGNC:3501]	protein_coding;processed_transcript	0.563022	-0.828736	0.000206739	down
ENSG00000166073	GPR176	ENST00000561100;ENST00000560729;ENST00000543580;ENST00000558041;ENST00000299092	G protein-coupled receptor 176 [Source:HGNC Symbol;Acc:HGNC:32370]	protein_coding;processed_transcript	0.56306	-0.828638	0.000126154	down
ENSG00000173041	ZNF680	ENST00000309683;ENST00000447137;ENST00000473601;ENST00000470847;ENST00000476563	zinc finger protein 680 [Source:HGNC Symbol;Acc:HGNC:26897]	protein_coding;processed_transcript;retained_intron	0.563082	-0.828584	0.0147403	down
ENSG00000084731	KIF3C	ENST00000264712;ENST00000496378;ENST00000417737;ENST00000475453;ENST00000405914;ENST00000455394;ENST00000488341	kinesin family member 3C [Source:HGNC Symbol;Acc:HGNC:6321]	protein_coding;processed_transcript;nonsense_mediated_decay;retained_intron	0.563295	-0.828038	9.66363e-07	down
ENSG00000165566	AMER2	ENST00000357816;ENST00000515384	APC membrane recruitment protein 2 [Source:HGNC Symbol;Acc:HGNC:26360]	protein_coding	0.563532	-0.827431	0.0228261	down
ENSG00000127423	AUNIP	ENST00000374298;ENST00000481602;ENST00000538789	aurora kinase A and ninein interacting protein [Source:HGNC Symbol;Acc:HGNC:28363]	protein_coding;processed_transcript	0.564084	-0.826019	0.014849	down
ENSG00000169641	LUZP1	ENST00000418342;ENST00000471849;ENST00000302291;ENST00000314174;ENST00000475164	leucine zipper protein 1 [Source:HGNC Symbol;Acc:HGNC:14985]	protein_coding	0.564099	-0.825978	6.75024e-07	down
ENSG00000189159	JPT1	ENST00000482348;ENST00000409753;ENST00000356033;ENST00000304834;ENST00000580380;ENST00000481647;ENST00000581874;ENST00000476258;ENST00000465454;ENST00000584079;ENST00000470924;ENST00000481094	Jupiter microtubule associated homolog 1 [Source:HGNC Symbol;Acc:HGNC:14569]	protein_coding;nonsense_mediated_decay;processed_transcript;retained_intron	0.564109	-0.825955	8.20784e-05	down
ENSG00000215784	FAM72D	ENST00000400889	family with sequence similarity 72 member D [Source:HGNC Symbol;Acc:HGNC:33593]	protein_coding	0.564211	-0.825692	0.0402843	down
ENSG00000155090	KLF10	ENST00000285407;ENST00000395884	Kruppel like factor 10 [Source:HGNC Symbol;Acc:HGNC:11810]	protein_coding	0.564338	-0.82537	0.000115803	down
ENSG00000100100	PIK3IP1	ENST00000441972;ENST00000215912;ENST00000480654;ENST00000402249;ENST00000443175;ENST00000493034	phosphoinositide-3-kinase interacting protein 1 [Source:HGNC Symbol;Acc:HGNC:24942]	protein_coding;retained_intron	0.564347	-0.825345	0.00604846	down
ENSG00000065357	DGKA	ENST00000331886;ENST00000394147;ENST00000549097;ENST00000548047;ENST00000552478;ENST00000551739;ENST00000556001;ENST00000550888;ENST00000551707;ENST00000548378;ENST00000555025;ENST00000550957;ENST00000549085;ENST00000553783;ENST00000548491;ENST00000552903;ENST00000546995;ENST00000550484;ENST00000546878;ENST00000549629;ENST00000549079;ENST00000549368;ENST00000549986;ENST00000557180;ENST00000548549…	diacylglycerol kinase alpha [Source:HGNC Symbol;Acc:HGNC:2849]	protein_coding;retained_intron;nonsense_mediated_decay;processed_transcript	0.564472	-0.825027	0.00182036	down
ENSG00000097021	ACOT7	ENST00000361521;ENST00000545482;ENST00000377855;ENST00000418124;ENST00000481175;ENST00000608083;ENST00000377845;ENST00000473466;ENST00000377860;ENST00000377842	acyl-CoA thioesterase 7 [Source:HGNC Symbol;Acc:HGNC:24157]	protein_coding;nonsense_mediated_decay;retained_intron	0.565686	-0.821927	1.31217e-05	down
ENSG00000106077	ABHD11	ENST00000497897;ENST00000412965;ENST00000458339;ENST00000222800;ENST00000437891;ENST00000395147;ENST00000480445;ENST00000462381;ENST00000474130;ENST00000437775;ENST00000357419;ENST00000486114;ENST00000468331;ENST00000468998	abhydrolase domain containing 11 [Source:HGNC Symbol;Acc:HGNC:16407]	retained_intron;nonsense_mediated_decay;protein_coding;processed_transcript	0.565763	-0.821731	0.004972	down
ENSG00000198513	ATL1	ENST00000674288;ENST00000441560;ENST00000557735;ENST00000674503;ENST00000556067;ENST00000554886;ENST00000674478;ENST00000555960;ENST00000556478;ENST00000358385;ENST00000553509;ENST00000555266;ENST00000553746	atlastin GTPase 1 [Source:HGNC Symbol;Acc:HGNC:11231]	nonsense_mediated_decay;protein_coding;processed_transcript;retained_intron	0.565799	-0.821639	0.00207415	down
ENSG00000242259	C22orf39	ENST00000399562;ENST00000542103;ENST00000399568;ENST00000611555;ENST00000333059;ENST00000509549	chromosome 22 open reading frame 39 [Source:HGNC Symbol;Acc:HGNC:27012]	protein_coding;nonsense_mediated_decay	0.565816	-0.821596	0.000928049	down
ENSG00000166908	PIP4K2C	ENST00000354947;ENST00000548264;ENST00000540759;ENST00000550095;ENST00000550360;ENST00000551772;ENST00000422156;ENST00000550465	phosphatidylinositol-5-phosphate 4-kinase type 2 gamma [Source:HGNC Symbol;Acc:HGNC:23786]	protein_coding;nonsense_mediated_decay	0.565943	-0.821271	0.0186114	down
ENSG00000142173	COL6A2	ENST00000300527;ENST00000397763;ENST00000409416;ENST00000460886;ENST00000310645;ENST00000485591;ENST00000436769;ENST00000413758	collagen type VI alpha 2 chain [Source:HGNC Symbol;Acc:HGNC:2212]	protein_coding;processed_transcript;retained_intron	0.566154	-0.820733	0.00128238	down
ENSG00000196562	SULF2	ENST00000495544;ENST00000359930;ENST00000484875;ENST00000467815;ENST00000479970;ENST00000437955;ENST00000474450;ENST00000463221;ENST00000479472;ENST00000433632;ENST00000478766;ENST00000465769	sulfatase 2 [Source:HGNC Symbol;Acc:HGNC:20392]	protein_coding;retained_intron;processed_transcript	0.566321	-0.820307	1.42793e-06	down
ENSG00000117298	ECE1	ENST00000357071;ENST00000264205;ENST00000415912;ENST00000374893;ENST00000649812;ENST00000481130;ENST00000526194;ENST00000527991;ENST00000531334;ENST00000436918;ENST00000528294;ENST00000470394;ENST00000463334;ENST00000473505	endothelin converting enzyme 1 [Source:HGNC Symbol;Acc:HGNC:3146]	protein_coding;retained_intron;processed_transcript	0.566562	-0.819695	5.61862e-06	down
ENSG00000188112	C6orf132	ENST00000341865;ENST00000356542	chromosome 6 open reading frame 132 [Source:HGNC Symbol;Acc:HGNC:21288]	protein_coding	0.566632	-0.819516	0.000359384	down
ENSG00000187134	AKR1C1	ENST00000477661;ENST00000380872;ENST00000476100;ENST00000380859;ENST00000442997	aldo-keto reductase family 1 member C1 [Source:HGNC Symbol;Acc:HGNC:384]	processed_transcript;protein_coding	0.566657	-0.819453	0.00358926	down
ENSG00000196584	XRCC2	ENST00000359321;ENST00000495707	X-ray repair cross complementing 2 [Source:HGNC Symbol;Acc:HGNC:12829]	protein_coding;processed_transcript	0.566961	-0.818678	0.00132877	down
ENSG00000151151	IPMK	ENST00000373935	inositol polyphosphate multikinase [Source:HGNC Symbol;Acc:HGNC:20739]	protein_coding	0.56758	-0.817105	0.000119659	down
ENSG00000166974	MAPRE2	ENST00000591734;ENST00000413393;ENST00000436190;ENST00000300249;ENST00000588349;ENST00000588910;ENST00000585592;ENST00000587359;ENST00000588085;ENST00000538170;ENST00000589699;ENST00000590793;ENST00000589180	microtubule associated protein RP/EB family member 2 [Source:HGNC Symbol;Acc:HGNC:6891]	protein_coding;retained_intron;processed_transcript	0.56805	-0.81591	1.16551e-05	down
ENSG00000184524	CEND1	ENST00000330106;ENST00000524587	cell cycle exit and neuronal differentiation 1 [Source:HGNC Symbol;Acc:HGNC:24153]	protein_coding;processed_transcript	0.568279	-0.815328	0.0127254	down
ENSG00000111799	COL12A1	ENST00000483888;ENST00000322507;ENST00000425443;ENST00000486533;ENST00000419671;ENST00000345356;ENST00000511023;ENST00000493109;ENST00000474564;ENST00000615798;ENST00000416123	collagen type XII alpha 1 chain [Source:HGNC Symbol;Acc:HGNC:2188]	protein_coding;retained_intron;processed_transcript	0.56835	-0.815148	5.02233e-06	down
ENSG00000123473	STIL	ENST00000337817;ENST00000396221;ENST00000418131;ENST00000371877;ENST00000436811;ENST00000433827;ENST00000447475;ENST00000360380;ENST00000413565	STIL centriolar assembly protein [Source:HGNC Symbol;Acc:HGNC:10879]	protein_coding;retained_intron	0.568386	-0.815058	0.000417736	down
ENSG00000175063	UBE2C	ENST00000243893;ENST00000372568;ENST00000352551;ENST00000356455;ENST00000335046;ENST00000405520;ENST00000496085;ENST00000617055	ubiquitin conjugating enzyme E2 C [Source:HGNC Symbol;Acc:HGNC:15937]	protein_coding;processed_transcript	0.568423	-0.814964	1.05949e-05	down
ENSG00000166803	PCLAF	ENST00000560234;ENST00000300035;ENST00000380258;ENST00000558250;ENST00000558043;ENST00000559280;ENST00000559519;ENST00000558008	PCNA clamp associated factor [Source:HGNC Symbol;Acc:HGNC:28961]	processed_transcript;protein_coding;retained_intron	0.568454	-0.814885	0.00647548	down
ENSG00000185515	BRCC3	ENST00000330045;ENST00000369462;ENST00000340647;ENST00000399042;ENST00000369459;ENST00000620502;ENST00000630295;ENST00000399026;ENST00000411985;ENST00000453705	BRCA1/BRCA2-containing complex subunit 3 [Source:HGNC Symbol;Acc:HGNC:24185]	protein_coding;nonsense_mediated_decay	0.568685	-0.814298	0.0306012	down
ENSG00000137310	TCF19	ENST00000376257;ENST00000376255;ENST00000496421;ENST00000542218	transcription factor 19 [Source:HGNC Symbol;Acc:HGNC:11629]	protein_coding;processed_transcript	0.569162	-0.813089	0.000930966	down
ENSG00000196943	NOP9	ENST00000267425;ENST00000396802;ENST00000557362;ENST00000650565	NOP9 nucleolar protein [Source:HGNC Symbol;Acc:HGNC:19826]	protein_coding;nonsense_mediated_decay	0.569676	-0.811787	3.54364e-06	down
ENSG00000272398	CD24	ENST00000622315;ENST00000606017;ENST00000615659;ENST00000619133;ENST00000621311;ENST00000620405;ENST00000619869;ENST00000610952	CD24 molecule [Source:HGNC Symbol;Acc:HGNC:1645]	protein_coding;processed_transcript	0.569884	-0.81126	7.955e-05	down
ENSG00000050327	ARHGEF5	ENST00000471847;ENST00000056217;ENST00000474817;ENST00000498580	Rho guanine nucleotide exchange factor 5 [Source:HGNC Symbol;Acc:HGNC:13209]	protein_coding	0.57024	-0.810358	0.00301308	down
ENSG00000015592	STMN4	ENST00000265770;ENST00000519614;ENST00000350889;ENST00000519997;ENST00000523048;ENST00000522908;ENST00000522750	stathmin 4 [Source:HGNC Symbol;Acc:HGNC:16078]	protein_coding;retained_intron	0.570402	-0.809949	4.75626e-05	down
ENSG00000179862	CITED4	ENST00000372638	Cbp/p300 interacting transactivator with Glu/Asp rich carboxy-terminal domain 4 [Source:HGNC Symbol;Acc:HGNC:18696]	protein_coding	0.570456	-0.809812	0.0412092	down
ENSG00000174672	BRSK2	ENST00000528841;ENST00000526678;ENST00000382179;ENST00000308219;ENST00000526768;ENST00000544817;ENST00000531932;ENST00000529951;ENST00000524702;ENST00000531197;ENST00000528710;ENST00000533606;ENST00000531078;ENST00000528596;ENST00000529433	BR serine/threonine kinase 2 [Source:HGNC Symbol;Acc:HGNC:11405]	protein_coding;retained_intron;nonsense_mediated_decay	0.571138	-0.808088	0.00390074	down
ENSG00000068308	OTUD5	ENST00000156084;ENST00000428668;ENST00000376488;ENST00000484499;ENST00000610466;ENST00000396743;ENST00000481142;ENST00000455452	OTU deubiquitinase 5 [Source:HGNC Symbol;Acc:HGNC:25402]	protein_coding;processed_transcript	0.57122	-0.807882	1.19627e-06	down
ENSG00000198695	MT-ND6	ENST00000361681	mitochondrially encoded NADH:ubiquinone oxidoreductase core subunit 6 [Source:HGNC Symbol;Acc:HGNC:7462]	protein_coding	0.57143	-0.807351	1.55994e-06	down
ENSG00000079102	RUNX1T1	ENST00000615601;ENST00000422361;ENST00000518992;ENST00000523290;ENST00000396218;ENST00000523629;ENST00000517493;ENST00000521054;ENST00000360348;ENST00000520978;ENST00000518449;ENST00000522860;ENST00000518954;ENST00000518256;ENST00000521751;ENST00000518823;ENST00000522163;ENST00000522467;ENST00000517792;ENST00000617740;ENST00000265814;ENST00000518361;ENST00000523168;ENST00000517919;ENST00000520583…	RUNX1 partner transcriptional co-repressor 1 [Source:HGNC Symbol;Acc:HGNC:1535]	protein_coding;retained_intron;processed_transcript;nonsense_mediated_decay	0.571511	-0.807146	0.00117862	down
ENSG00000128050	PAICS	ENST00000514888;ENST00000505164;ENST00000399688;ENST00000264221;ENST00000512576;ENST00000510584;ENST00000504188;ENST00000508554	phosphoribosylaminoimidazole carboxylase and phosphoribosylaminoimidazolesuccinocarboxamide synthase [Source:HGNC Symbol;Acc:HGNC:8587]	protein_coding;retained_intron	0.571643	-0.806814	0.00294385	down
ENSG00000170681	CAVIN4	ENST00000307584	caveolae associated protein 4 [Source:HGNC Symbol;Acc:HGNC:33742]	protein_coding	0.571712	-0.806639	0.00294385	down
ENSG00000139890	REM2	ENST00000536884;ENST00000267396	RRAD and GEM like GTPase 2 [Source:HGNC Symbol;Acc:HGNC:20248]	protein_coding	0.571855	-0.806279	0.0225366	down
ENSG00000160072	ATAD3B	ENST00000673477;ENST00000474481;ENST00000485748;ENST00000472194;ENST00000308647;ENST00000378736	ATPase family AAA domain containing 3B [Source:HGNC Symbol;Acc:HGNC:24007]	protein_coding;retained_intron;processed_transcript	0.571996	-0.805924	0.000123588	down
ENSG00000142731	PLK4	ENST00000270861;ENST00000507249;ENST00000508113;ENST00000513090;ENST00000514379;ENST00000503914;ENST00000515069;ENST00000511942;ENST00000510605;ENST00000507454;ENST00000510192	polo like kinase 4 [Source:HGNC Symbol;Acc:HGNC:11397]	protein_coding;retained_intron;processed_transcript	0.572276	-0.805216	0.000467865	down
ENSG00000067057	PFKP	ENST00000421751;ENST00000433193;ENST00000381125;ENST00000415005;ENST00000413079;ENST00000381072;ENST00000495715;ENST00000381075;ENST00000407806;ENST00000468050;ENST00000607886;ENST00000460445	phosphofructokinase, platelet [Source:HGNC Symbol;Acc:HGNC:8878]	processed_transcript;protein_coding;retained_intron	0.572479	-0.804704	1.43442e-06	down
ENSG00000091490	SEL1L3	ENST00000399878;ENST00000513416;ENST00000514872;ENST00000513364;ENST00000264868;ENST00000512286;ENST00000502949;ENST00000514321;ENST00000509290;ENST00000510880;ENST00000513691;ENST00000507618;ENST00000510448	SEL1L family member 3 [Source:HGNC Symbol;Acc:HGNC:29108]	protein_coding;retained_intron;processed_transcript	0.57261	-0.804374	0.000385952	down
ENSG00000213445	SIPA1	ENST00000534313;ENST00000394224;ENST00000527525;ENST00000528699;ENST00000531339;ENST00000530226;ENST00000529725;ENST00000534406;ENST00000526137;ENST00000533361	signal-induced proliferation-associated 1 [Source:HGNC Symbol;Acc:HGNC:10885]	protein_coding;retained_intron	0.572831	-0.803819	0.0232218	down
ENSG00000140323	DISP2	ENST00000267889;ENST00000561261;ENST00000558623;ENST00000559721	dispatched RND transporter family member 2 [Source:HGNC Symbol;Acc:HGNC:19712]	protein_coding;processed_transcript;retained_intron	0.572856	-0.803756	0.00791189	down
ENSG00000140564	FURIN	ENST00000268171;ENST00000618099;ENST00000610579;ENST00000560824;ENST00000560018;ENST00000640725;ENST00000559353;ENST00000558794	furin, paired basic amino acid cleaving enzyme [Source:HGNC Symbol;Acc:HGNC:8568]	protein_coding;retained_intron;nonsense_mediated_decay	0.573071	-0.803214	1.81571e-06	down
ENSG00000160200	CBS	ENST00000461686;ENST00000352178;ENST00000491776;ENST00000462349;ENST00000398158;ENST00000398165;ENST00000458223;ENST00000488526;ENST00000496485;ENST00000470912;ENST00000478709;ENST00000451248;ENST00000441030;ENST00000359624;ENST00000465732;ENST00000486098;ENST00000430013	cystathionine beta-synthase [Source:HGNC Symbol;Acc:HGNC:1550]	retained_intron;protein_coding;processed_transcript	0.573296	-0.802648	3.35576e-06	down
ENSG00000196220	SRGAP3	ENST00000360413;ENST00000485983;ENST00000383836;ENST00000470951;ENST00000480750;ENST00000475560;ENST00000491467;ENST00000490348;ENST00000618999;ENST00000433332;ENST00000490889;ENST00000520860;ENST00000518265	SLIT-ROBO Rho GTPase activating protein 3 [Source:HGNC Symbol;Acc:HGNC:19744]	protein_coding;retained_intron;processed_transcript	0.573364	-0.802478	0.00478105	down
ENSG00000130477	UNC13A	ENST00000519716;ENST00000550896;ENST00000551649;ENST00000523229;ENST00000552293;ENST00000601528;ENST00000517497	unc-13 homolog A [Source:HGNC Symbol;Acc:HGNC:23150]	protein_coding;retained_intron	0.573437	-0.802293	0.00176706	down
ENSG00000196998	WDR45	ENST00000635003;ENST00000475977;ENST00000376372;ENST00000396681;ENST00000475880;ENST00000433252;ENST00000367375;ENST00000322995;ENST00000465806;ENST00000376368;ENST00000480412;ENST00000634849;ENST00000474053;ENST00000634908;ENST00000476728;ENST00000634522;ENST00000634852;ENST00000635666;ENST00000356463;ENST00000634465;ENST00000471338;ENST00000465382;ENST00000465431;ENST00000460501;ENST00000636645…	WD repeat domain 45 [Source:HGNC Symbol;Acc:HGNC:28912]	protein_coding;retained_intron;processed_transcript;nonsense_mediated_decay	0.573521	-0.802081	0.000402766	down
ENSG00000271303	SRXN1	ENST00000381962	sulfiredoxin 1 [Source:HGNC Symbol;Acc:HGNC:16132]	protein_coding	0.573527	-0.802067	0.00014523	down
ENSG00000113319	RASGRF2	ENST00000265080;ENST00000502677;ENST00000638442;ENST00000512186;ENST00000503795;ENST00000514946	Ras protein specific guanine nucleotide releasing factor 2 [Source:HGNC Symbol;Acc:HGNC:9876]	protein_coding;retained_intron;processed_transcript;nonsense_mediated_decay	0.573582	-0.801929	9.11092e-05	down
ENSG00000108309	RUNDC3A	ENST00000590834;ENST00000587483;ENST00000426726;ENST00000588564;ENST00000590941;ENST00000225441;ENST00000593079	RUN domain containing 3A [Source:HGNC Symbol;Acc:HGNC:16984]	retained_intron;protein_coding	0.573721	-0.80158	0.000723788	down
ENSG00000178999	AURKB	ENST00000578753;ENST00000534871;ENST00000584561;ENST00000578549;ENST00000585124;ENST00000577833;ENST00000584972;ENST00000582368;ENST00000583915;ENST00000580998;ENST00000583124;ENST00000316199;ENST00000580390;ENST00000581511	aurora kinase B [Source:HGNC Symbol;Acc:HGNC:11390]	retained_intron;protein_coding;nonsense_mediated_decay	0.573856	-0.801238	0.000806725	down
ENSG00000181104	F2R	ENST00000319211;ENST00000505600	coagulation factor II thrombin receptor [Source:HGNC Symbol;Acc:HGNC:3537]	protein_coding	0.573885	-0.801167	2.83728e-05	down
ENSG00000164695	CHMP4C	ENST00000297265	charged multivesicular body protein 4C [Source:HGNC Symbol;Acc:HGNC:30599]	protein_coding	0.574444	-0.799762	0.0129641	down
ENSG00000102096	PIM2	ENST00000376509;ENST00000442430;ENST00000485431	Pim-2 proto-oncogene, serine/threonine kinase [Source:HGNC Symbol;Acc:HGNC:8987]	protein_coding;processed_transcript	0.574745	-0.799006	0.000838621	down
ENSG00000248643	RBM14-RBM4	ENST00000421355;ENST00000511114;ENST00000500635;ENST00000412278	RBM14-RBM4 readthrough [Source:HGNC Symbol;Acc:HGNC:38840]	nonsense_mediated_decay;processed_transcript;protein_coding	0.575278	-0.797668	0.000373394	down
ENSG00000198431	TXNRD1	ENST00000527688;ENST00000503506;ENST00000526207;ENST00000526390;ENST00000526580;ENST00000354940;ENST00000526691;ENST00000525265;ENST00000526266;ENST00000529784;ENST00000527335;ENST00000388854;ENST00000531691;ENST00000531689;ENST00000534282;ENST00000397736;ENST00000525566;ENST00000526006;ENST00000528079;ENST00000529751;ENST00000526950;ENST00000529546;ENST00000524698;ENST00000429002	thioredoxin reductase 1 [Source:HGNC Symbol;Acc:HGNC:12437]	nonsense_mediated_decay;protein_coding;retained_intron;processed_transcript	0.575319	-0.797565	4.96298e-06	down
ENSG00000087495	PHACTR3	ENST00000492611;ENST00000473657;ENST00000371015;ENST00000434923;ENST00000359926;ENST00000395636;ENST00000355648;ENST00000361300;ENST00000541461	phosphatase and actin regulator 3 [Source:HGNC Symbol;Acc:HGNC:15833]	protein_coding;retained_intron	0.57545	-0.797238	0.00572249	down
ENSG00000185989	RASA3	ENST00000334062;ENST00000542651	RAS p21 protein activator 3 [Source:HGNC Symbol;Acc:HGNC:20331]	protein_coding;processed_transcript	0.575565	-0.79695	0.00121046	down
ENSG00000137193	PIM1	ENST00000373509;ENST00000468243;ENST00000479509	Pim-1 proto-oncogene, serine/threonine kinase [Source:HGNC Symbol;Acc:HGNC:8986]	protein_coding;processed_transcript	0.575742	-0.796506	0.00082209	down
ENSG00000182175	RGMA	ENST00000542321;ENST00000543599;ENST00000329082;ENST00000556950;ENST00000425933;ENST00000557608;ENST00000557301;ENST00000557420;ENST00000555584;ENST00000555598;ENST00000556658;ENST00000650169;ENST00000554387	repulsive guidance molecule BMP co-receptor a [Source:HGNC Symbol;Acc:HGNC:30308]	protein_coding;retained_intron;processed_transcript;nonsense_mediated_decay	0.5761	-0.79561	0.000111955	down
ENSG00000150093	ITGB1	ENST00000396033;ENST00000474568;ENST00000302278;ENST00000472147;ENST00000493758;ENST00000494395;ENST00000423113;ENST00000437302;ENST00000488494;ENST00000488427;ENST00000417122;ENST00000528877;ENST00000464001;ENST00000480226;ENST00000475184;ENST00000534049;ENST00000484088;ENST00000439974;ENST00000414670	integrin subunit beta 1 [Source:HGNC Symbol;Acc:HGNC:6153]	protein_coding;nonsense_mediated_decay;retained_intron;processed_transcript	0.576222	-0.795303	2.17722e-06	down
ENSG00000153012	LGI2	ENST00000382114;ENST00000512108	leucine rich repeat LGI family member 2 [Source:HGNC Symbol;Acc:HGNC:18710]	protein_coding	0.576235	-0.79527	0.000564404	down
ENSG00000160336	ZNF761	ENST00000432094;ENST00000454407;ENST00000613950;ENST00000334095	zinc finger protein 761 [Source:HGNC Symbol;Acc:HGNC:23179]	protein_coding	0.576452	-0.794728	0.00155014	down
ENSG00000008300	CELSR3	ENST00000461362;ENST00000164024;ENST00000498057;ENST00000470999	cadherin EGF LAG seven-pass G-type receptor 3 [Source:HGNC Symbol;Acc:HGNC:3230]	retained_intron;protein_coding	0.5765	-0.794608	7.915e-05	down
ENSG00000169684	CHRNA5	ENST00000299565;ENST00000559554;ENST00000559576;ENST00000394802	cholinergic receptor nicotinic alpha 5 subunit [Source:HGNC Symbol;Acc:HGNC:1959]	protein_coding	0.576527	-0.794541	0.00113738	down
ENSG00000101333	PLCB4	ENST00000278655;ENST00000414679;ENST00000378493;ENST00000378501;ENST00000378473;ENST00000464199;ENST00000407043;ENST00000492632;ENST00000416836;ENST00000437503;ENST00000482123;ENST00000441846;ENST00000473151	phospholipase C beta 4 [Source:HGNC Symbol;Acc:HGNC:9059]	protein_coding;processed_transcript	0.576609	-0.794335	6.97315e-05	down
ENSG00000162878	PKDCC	ENST00000475868;ENST00000480099;ENST00000485578;ENST00000490302;ENST00000294964;ENST00000492861;ENST00000475241;ENST00000401498;ENST00000470578	protein kinase domain containing, cytoplasmic [Source:HGNC Symbol;Acc:HGNC:25123]	retained_intron;processed_transcript;protein_coding;nonsense_mediated_decay	0.576672	-0.794177	0.000150824	down
ENSG00000163249	CCNYL1	ENST00000650811;ENST00000295414;ENST00000339882;ENST00000392209;ENST00000420822;ENST00000468768;ENST00000452312;ENST00000420321	cyclin Y like 1 [Source:HGNC Symbol;Acc:HGNC:26868]	nonsense_mediated_decay;protein_coding;processed_transcript	0.576721	-0.794055	4.52481e-05	down
ENSG00000198786	MT-ND5	ENST00000361567	mitochondrially encoded NADH:ubiquinone oxidoreductase core subunit 5 [Source:HGNC Symbol;Acc:HGNC:7461]	protein_coding	0.576821	-0.793804	2.09181e-06	down
ENSG00000169032	MAP2K1	ENST00000307102;ENST00000566326;ENST00000425818	mitogen-activated protein kinase kinase 1 [Source:HGNC Symbol;Acc:HGNC:6840]	protein_coding;retained_intron	0.577059	-0.793208	8.69383e-06	down
ENSG00000141449	GREB1L	ENST00000580732;ENST00000424526;ENST00000584446;ENST00000579454;ENST00000578955;ENST00000581327;ENST00000269218;ENST00000578383;ENST00000578368;ENST00000580384;ENST00000580683	GREB1 like retinoic acid receptor coactivator [Source:HGNC Symbol;Acc:HGNC:31042]	protein_coding;retained_intron;processed_transcript	0.577524	-0.792046	2.83993e-06	down
ENSG00000122786	CALD1	ENST00000361675;ENST00000482470;ENST00000466704;ENST00000422748;ENST00000443197;ENST00000495522;ENST00000424922;ENST00000473714;ENST00000393118;ENST00000361901;ENST00000454108;ENST00000480638;ENST00000462181;ENST00000475772;ENST00000430085;ENST00000417172;ENST00000498254;ENST00000436461;ENST00000489019;ENST00000435928;ENST00000478075;ENST00000496024;ENST00000472096;ENST00000445569	caldesmon 1 [Source:HGNC Symbol;Acc:HGNC:1441]	protein_coding;retained_intron;nonsense_mediated_decay;processed_transcript	0.577621	-0.791805	1.70788e-05	down
ENSG00000162545	CAMK2N1	ENST00000375078;ENST00000489020	calcium/calmodulin dependent protein kinase II inhibitor 1 [Source:HGNC Symbol;Acc:HGNC:24190]	protein_coding;processed_transcript	0.577731	-0.791529	9.47414e-05	down
ENSG00000187634	SAMD11	ENST00000341065;ENST00000420190;ENST00000474461;ENST00000616016;ENST00000464948;ENST00000618323;ENST00000620200;ENST00000617307;ENST00000618779;ENST00000455979;ENST00000616125;ENST00000618181;ENST00000466827;ENST00000622503;ENST00000342066;ENST00000478729;ENST00000437963	sterile alpha motif domain containing 11 [Source:HGNC Symbol;Acc:HGNC:28706]	protein_coding;retained_intron;processed_transcript	0.577737	-0.791515	0.0120883	down
ENSG00000089876	DHX32	ENST00000415732;ENST00000368721;ENST00000284690	DEAH-box helicase 32 (putative) [Source:HGNC Symbol;Acc:HGNC:16717]	protein_coding	0.577871	-0.791181	2.01483e-05	down
ENSG00000166272	WBP1L	ENST00000369889;ENST00000448841;ENST00000369884;ENST00000647664	WW domain binding protein 1 like [Source:HGNC Symbol;Acc:HGNC:23510]	protein_coding;processed_transcript;nonsense_mediated_decay	0.578384	-0.7899	2.43727e-06	down
ENSG00000176915	ANKLE2	ENST00000542657;ENST00000439231;ENST00000538591;ENST00000505031;ENST00000357997;ENST00000539605;ENST00000538766;ENST00000542282;ENST00000535036;ENST00000542374;ENST00000546061;ENST00000545623	ankyrin repeat and LEM domain containing 2 [Source:HGNC Symbol;Acc:HGNC:29101]	protein_coding;retained_intron;nonsense_mediated_decay;processed_transcript	0.578663	-0.789204	9.46596e-06	down
ENSG00000143384	MCL1	ENST00000369026;ENST00000464132;ENST00000307940;ENST00000620947	MCL1 apoptosis regulator, BCL2 family member [Source:HGNC Symbol;Acc:HGNC:6943]	protein_coding;processed_transcript	0.578699	-0.789115	2.13101e-05	down
ENSG00000152137	HSPB8	ENST00000281938;ENST00000676244;ENST00000674715;ENST00000676008;ENST00000676071;ENST00000674542;ENST00000675573;ENST00000674763;ENST00000674852;ENST00000541798;ENST00000542496;ENST00000675110;ENST00000675900;ENST00000675211	heat shock protein family B (small) member 8 [Source:HGNC Symbol;Acc:HGNC:30171]	protein_coding;processed_transcript;nonsense_mediated_decay	0.578716	-0.789073	0.00127936	down
ENSG00000176887	SOX11	ENST00000322002	SRY-box transcription factor 11 [Source:HGNC Symbol;Acc:HGNC:11191]	protein_coding	0.578864	-0.788703	2.89934e-06	down
ENSG00000180263	FGD6	ENST00000343958;ENST00000546711;ENST00000549499;ENST00000548069;ENST00000551521;ENST00000451107;ENST00000550368	FYVE, RhoGEF and PH domain containing 6 [Source:HGNC Symbol;Acc:HGNC:21740]	protein_coding;nonsense_mediated_decay;processed_transcript	0.579488	-0.78715	1.31217e-05	down
ENSG00000143514	TP53BP2	ENST00000343537;ENST00000391878;ENST00000472180;ENST00000464656;ENST00000498843;ENST00000481128;ENST00000473135;ENST00000464172;ENST00000465119;ENST00000496282;ENST00000494100;ENST00000489310;ENST00000490896;ENST00000483398	tumor protein p53 binding protein 2 [Source:HGNC Symbol;Acc:HGNC:12000]	protein_coding;processed_transcript;nonsense_mediated_decay;retained_intron	0.579672	-0.786691	1.8046e-06	down
ENSG00000149294	NCAM1	ENST00000528158;ENST00000529356;ENST00000618266;ENST00000531044;ENST00000316851;ENST00000530090;ENST00000534516;ENST00000619839;ENST00000524916;ENST00000615112;ENST00000525691;ENST00000401611;ENST00000617166;ENST00000528590;ENST00000621850;ENST00000534046;ENST00000613217;ENST00000530543;ENST00000621518;ENST00000621128;ENST00000615525;ENST00000531817;ENST00000533226;ENST00000620046;ENST00000533073…	neural cell adhesion molecule 1 [Source:HGNC Symbol;Acc:HGNC:7656]	protein_coding;retained_intron;processed_transcript;nonsense_mediated_decay	0.580337	-0.785038	0.000133487	down
ENSG00000160190	SLC37A1	ENST00000352133;ENST00000398341;ENST00000454800;ENST00000398343;ENST00000419522;ENST00000471277;ENST00000487951;ENST00000496416;ENST00000484887	solute carrier family 37 member 1 [Source:HGNC Symbol;Acc:HGNC:11024]	protein_coding;processed_transcript;retained_intron	0.580496	-0.784642	0.000133473	down
ENSG00000221968	FADS3	ENST00000529404;ENST00000533676;ENST00000278829;ENST00000414624;ENST00000527379;ENST00000525588;ENST00000525094;ENST00000526294;ENST00000529525;ENST00000534223;ENST00000527697;ENST00000534426;ENST00000531956	fatty acid desaturase 3 [Source:HGNC Symbol;Acc:HGNC:3576]	retained_intron;protein_coding;processed_transcript	0.580603	-0.784376	0.00296377	down
ENSG00000105983	LMBR1	ENST00000650699;ENST00000353442;ENST00000359422;ENST00000433968;ENST00000430278;ENST00000498034;ENST00000434503;ENST00000444719;ENST00000638959;ENST00000461469;ENST00000434453;ENST00000477983;ENST00000454132;ENST00000461603;ENST00000448926;ENST00000415428;ENST00000609774;ENST00000609081;ENST00000414218;ENST00000430825;ENST00000485985;ENST00000486837;ENST00000434278	limb development membrane protein 1 [Source:HGNC Symbol;Acc:HGNC:13243]	protein_coding;processed_transcript;nonsense_mediated_decay;retained_intron	0.580747	-0.784018	0.00874317	down
ENSG00000188610	FAM72B	ENST00000369390;ENST00000616749;ENST00000355228;ENST00000468129;ENST00000452190;ENST00000619376;ENST00000471903	family with sequence similarity 72 member B [Source:HGNC Symbol;Acc:HGNC:24805]	protein_coding;processed_transcript	0.580844	-0.783776	0.0478842	down
ENSG00000003400	CASP10	ENST00000286186;ENST00000485408;ENST00000272879;ENST00000492363;ENST00000460140;ENST00000346817;ENST00000374650;ENST00000448480;ENST00000471191;ENST00000360132;ENST00000484926;ENST00000438843;ENST00000313728	caspase 10 [Source:HGNC Symbol;Acc:HGNC:1500]	protein_coding;retained_intron;processed_transcript;nonsense_mediated_decay	0.581042	-0.783286	0.03848	down
ENSG00000115963	RND3	ENST00000497865;ENST00000263895;ENST00000375734;ENST00000472416;ENST00000409557;ENST00000454202;ENST00000439275;ENST00000473639;ENST00000466334	Rho family GTPase 3 [Source:HGNC Symbol;Acc:HGNC:671]	retained_intron;protein_coding;processed_transcript	0.58112	-0.783091	4.1806e-05	down
ENSG00000132639	SNAP25	ENST00000495883;ENST00000254976;ENST00000304886;ENST00000492814;ENST00000430336	synaptosome associated protein 25 [Source:HGNC Symbol;Acc:HGNC:11132]	processed_transcript;protein_coding	0.581244	-0.782785	0.00368367	down
ENSG00000123416	TUBA1B	ENST00000336023;ENST00000332858;ENST00000547476;ENST00000547765;ENST00000550367;ENST00000549870;ENST00000551324;ENST00000552984	tubulin alpha 1b [Source:HGNC Symbol;Acc:HGNC:18809]	protein_coding;retained_intron;nonsense_mediated_decay	0.581953	-0.781024	3.90123e-05	down
ENSG00000102879	CORO1A	ENST00000568763;ENST00000568982;ENST00000219150;ENST00000561849;ENST00000567034;ENST00000564768;ENST00000569469;ENST00000565497;ENST00000570045;ENST00000569970;ENST00000566619;ENST00000563778;ENST00000564446;ENST00000570244;ENST00000569203;ENST00000561815;ENST00000562129	coronin 1A [Source:HGNC Symbol;Acc:HGNC:2252]	retained_intron;protein_coding;processed_transcript	0.582099	-0.780664	0.0121126	down
[truncated: 2,696 more rows]
