# Supplementary material for: An antisense oligonucleotide-based strategy to ameliorate cognitive dysfunction in the 22q11.2 Deletion Syndrome
Source: eLife. 2025 May 27;13:RP103328. doi: 10.7554/eLife.103328 (PMC12113277; doi:10.7554/eLife.103328)
Supplement: Supplementary file 4. [file elife-103328-supp4.xlsx]

## Sheet: Supp File 4
Supplementary File 4. List of targets of downregulated miRNAs identified from the intersection of predicted targets of downregulated miRNAs and up-regulated DEGs in hiPSC-derived cortical neurons at DIV8
Gene:
CLMP
PKNOX2
DECR1
DIRAS1
CHD9
EVC
FIBCD1
COL1A1
PDCD4
PLEKHG4
PPP1R3D
FPGT
HS2ST1
CBLL1
AIPL1
ID1
TMEM59
SDC2
TFAP2B
CDH8
PCCB
FKBP4
ATP7B
PPM1H
KCNK10
ZNF487
AKIRIN1
CHRNB1
TMED7
ARHGEF26
POLR3G
DNAJB4
LGR5
TM9SF4
LRP1B
OXA1L
GPR157
FAM199X
SDK2
CALCOCO2
SNCA
SPATS2L
SLC48A1
ARSK
EPB41L3
ALDH5A1
GALNT10
ACSS3
CACNA1C
PDCD6
PRKN
SLC35F5
ST7L
NTRK2
PXMP4
ARL17B
SESN1
EMC10
ERBB2
GLIS3
SRGAP1
CALCR
CMTM4
TSPYL1
PSMD10
HADHB
MBNL3
ADORA2B
SAMD15
CA8
TMEM64
LRCH1
ZCCHC2
FAM124A
CHIC1
MAF
HELZ
ATRNL1
NEK9
CHRM3
TLE4
MYLK3
LRIT3
UGT8
SLC25A23
SLC4A4
ARL5A
TBC1D8B
PARD6B
FLVCR2
ZNF251
CCDC51
ERGIC1
ERBB4
AIFM1
WWC2
ATXN7L1
ZNF85
C5orf24
EPDR1
TIGD6
GPR137B
INTU
COQ7
ZFP37
TIPARP
PDE6D
TTLL1
GPCPD1
FAT2
SPICE1
ZNF609
ERMP1
ARL4C
SCD5
PAN2
AHCY
OTX1
ABCB1
MSI1
RNF2
FAAH
SV2B
SATB2
ANXA6
EMID1
PLEKHA3
MPI
FAM229B
ARSB
DPYSL5
CPM
N6AMT1
SLC35G1
HSPA1A
CDH6
PYGO2
BCL2L13
JAZF1
CCDC30
UROS
LIX1
PABPC4L
HEBP2
PTAR1
FXR1
TMEM67
RGS2
P3H4
COL3A1
RHPN1
TMEM9
UVRAG
NUCB2
DNMBP
SP1
EFHB
SLC1A1
EPHA6
COPS8
SHISA9
GJD2
SLC2A4
LY6H
NRIP3
CDKN1C
SYNPR
C3orf18
CSNK1G3
NHSL1
ARHGEF6
CFAP77
GAS7
CIT
ABRAXAS1
PTBP2
MFSD4B
ZFHX3
EGLN3
UNC119
CDC42SE2
KITLG
DDR2
STX16
ALDH3B1
MAGED2
TRPS1
RFLNB
ATP1B3
PTPN13
ALDH9A1
SLC25A43
PUM1
ANKRD45
CIPC
COX7A2L
UBB
SLC16A14
EPS8
ARL4A
GPC5
WNT8B
SCUBE3
HS3ST1
TRIM2
EDNRA
GPR19
SMAD9
APPBP2
SLC25A21
CLSTN2
OCRL
NEBL
AGTRAP
STMP1
ZNF425
PFKL
RRAD
CCDC113
TOR1AIP1
ALDH6A1
RILPL1
SIRT2
PHYKPL
C1orf198
SGK1
ZNF827
LMAN2L
HYPK
MCFD2
GNS
BMP7
NCKAP5L
DMXL1
RASGEF1A
XPOT
SLC7A11
DOCK4
SLC5A3
FIGN
CALM2
TSPAN31
LIX1L
FKBP8
INPPL1
IFFO1
WDTC1
ME2
MKNK2
CCS
SASH1
ZNF365
TLN2
USP46
ZNF132
LINGO2
CCDC38
SLC43A2
GGCX
CHCHD10
KIF13A
CLIP4
TFPI
BBS5
SEC14L6
TNNI1
UNC80
TGFBR3
RASSF8
ADM
SERF2
CD47
PPIC
CLDN1
BEX3
AGBL5
RNF11
CNNM2
IFITM1
GAS6
PPARGC1B
SLC6A17
STT3B
B3GNT2
CKAP4
MCTP1
MOB3B
DRD1
COBLL1
TSPAN11
OTUD1
MATR3
PRDX6
FBN2
RASL10B
P3H1
SSBP4
SRPRA
NPAS1
SEMA3E
SLC2A3
NUDT7
APOB
CDH2
ARID5B
CAVIN1
PRDM4
IL31RA
C8orf37
TOM1L2
METTL15
MSX2
UHMK1
DNALI1
AASDHPPT
CDK6
SOX12
GOLGA8A
FGFR2
PDPR
RPS26
SPATA6
KCNC3
FBXO17
AP5M1
PRPS1
GALM
TECPR2
SLC4A2
STK33
OSTM1
RBM12B
RETREG2
PLEKHH2
GLI3
LHPP
NIPAL2
ZNF829
BMPER
MKRN2
EPHX2
CCDC8
SLC37A4
THOC3
GLUD1
BDH1
IKZF2
AFF2
MLLT1
CSTF2
FOXRED2
GUCY1A2
KREMEN1
JMY
REEP5
ZNF844
GLUL
MDK
APLP2
GPR146
SIDT2
ADCY6
WSCD2
SSTR1
SALL4
ACER2
APCDD1
CMBL
OSBPL11
EXOG
BCCIP
HSPA1B
MORC4
FAM227A
UNC93B1
LMX1B
SEMA5A
FREM1
B3GALNT2
CAPN7
PARD3
VSIG10
ZNF33A
DUSP9
RFTN2
GGA2
PRKCA
CLN3
DPY19L1
C15orf40
PAX7
ABCC6
NAP1L2
COL4A5
COX15
SLC15A2
MET
NMNAT1
EFNB1
GRK1
MFF
APOE
VAT1L
GMPR
SLC16A5
RFX3
WDFY2
ATP11C
A4GALT
CARD8
THRB
IRS1
NUCB1
ARL16
TLCD2
PAQR8
SNX25
MYO5C
EPHA4
ZNF70
NQO2
MED14
KLHL7
SOX9
DTNB
SVIL
ENO4
ACADVL
NOTCH2
CHCHD5
ZBTB47
ZFHX2
GRIN2A
IL1RAPL1
CA12
UPF1
TRPV1
ATG4A
FNDC4
GRAMD1B
FOXP2
UNC119B
PNMA2
RPS10
TRIM73
TMEM38A
ZMAT1
TNPO1
BBS4
CLPTM1L
ITPKB
HM13
PRX
MCC
ID2
RHOQ
STXBP4
CLCN3
METTL24
DDX17
GAS1
ZMYM4
ERO1B
RBM41
SHPK
PDGFRA
CFAP65
KLHL5
SOCS5
RNMT
ST6GAL1
PYGO1
ST3GAL5
P2RY11
PLP1
BNC2
HEXA
MTFR1L
COL1A2
ABLIM1
KIF26B
IRS4
TMEM160
DIAPH2
CLN8
ZNF454
MSL3
COG6
GLUD2
YOD1
FMO4
KATNAL1
CNKSR3
SLC15A4
PARVA
TRMT112
DCAF12
KBTBD6
FOLR1
ATP13A4
GLB1L
MID1
TSHZ2
STON2
PIK3C2A
ZBTB16
HPS3
MAN1C1
GRIN2B
ATP6AP1
SPHK1
ITPR1
ZCCHC3
E2F5
GREM1
RPL30
SIGMAR1
TMEM94
XPR1
SGPP2
LATS2
TMEM65
TRIM67
TTR
BCORL1
BRAT1
SLITRK5
S1PR1
NBPF10
SLC9A6
RAB3D
PLAG1
CCDC65
CCDC80
CAMK2A
CLU
PURG
DGAT2
NLGN1
PLAGL2
TM2D2
IL6ST
CTDSP1
IBTK
ARMCX6
BSCL2
ZNF185
SMG6
CBY1
NOG
GPD2
CDV3
EIF4A2
SHROOM2
SLC25A12
SREK1
SPARC
GTF3C1
EFCAB1
SUPT7L
AGMAT
TMEM101
RBM43
KLHL3
PNPO
TMED4
MBOAT2
TCEAL1
SLC16A10
PTGIS
KBTBD7
PPIL6
MAMLD1
PDE12
MMGT1
C1RL
MITF
GYS1
BAK1
SYNGAP1
LIMS2
ZFP14
ALDH3A2
NKD1
TMEM98
TMEM120B
ABHD2
QPRT
LDHB
BAMBI
BBS1
SULT1C2
PCDHGC5
YIPF6
ZNF354C
EEPD1
RIMBP2
COL5A2
RAB9B
CYB561
EPHA7
ANTXR1
CORO1C
IL13RA1
SPDL1
RNF150
IMPACT
CCND1
ATXN2
RASSF9
SIK2
POFUT2
PRKACB
BCL6
TMEFF2
RSPH3
YES1
NUDT16
SAMD5
NR2F2
CACNA2D2
CCDC74A
VWC2L
DUSP23
INPP5F
GPC4
SIKE1
ZIC5
CRABP2
CCDC125
CTNS
CES3
DKK3
DDX31
POLL
ZNF268
P3H2
TTC8
BLCAP
EHD4
OSBPL1A
LRP2
RALGPS2
FER
CEP19
MFAP2
MPP5
SELENOI
POLE4
LYSMD3
GPX8
VASN
SGCD
P4HA1
ZNF106
SLC39A8
TMEM123
SHROOM4
ZFAND5
SUCO
DYNC2LI1
PTPRM
SSPN
ACACB
CYB5D1
CTSA
C5orf22
TESK2
IDE
LPIN1
CCDC152
CYBRD1
TRIM36
FBXL13
SYNGR1
REEP2
REPIN1
VGLL4
MYADM
RCBTB1
ADAMTS18
SUSD5
NDUFAF3
SYNE2
NETO2
KCTD15
CDH13
MDGA2
GJA1
PHLPP2
MRI1
GPX7
NPHP1
KIAA1958
ZNF148
CACHD1
ARNT
CADM2
PACRGL
COPZ1
STIM1
FKBP14
CTSV
TSC22D3
RAPGEFL1
MPV17L
CTXN1
ZDHHC24
ELOVL7
USP13
MORF4L2
CRB2
SLC16A9
ARL10
PHKA1
PRKAR1A
SRGAP2
MYLK4
NRG2
DIRAS2
RNF115
CYYR1
ICOSLG
AFG1L
PUS10
INTS3
STK11IP
ECM2
SESN3
PTPRD
PIAS2
ATP1A2
ZNF283
PLXDC2
MBD6
ZDHHC9
TTC28
ARRDC3
H6PD
DOCK10
IGDCC4
FNDC3A
ANAPC16
ABAT
PCDH10
SRPRB
DNAJB9
PIGS
MRPS27
ST6GAL2
SEMA3D
MED28
NSA2
DKK1
EIF2AK1
HHIP
MTSS1
PPFIA1
CAB39L
PEX11A
NPTX1
FOXP1
POFUT1
FAM114A1
MCRIP2
TLL1
TMEM254
PDZD4
CLUAP1
SPAG7
PDSS2
SLCO4C1
PRMT7
GOLGA8B
