# Supplementary material for: An antisense oligonucleotide-based strategy to ameliorate cognitive dysfunction in the 22q11.2 Deletion Syndrome
Source: eLife. 2025 May 27;13:RP103328. doi: 10.7554/eLife.103328 (PMC12113277; doi:10.7554/eLife.103328)
Supplement: Supplementary file 5. [file elife-103328-supp5.xlsx]

## Sheet: Supp File 5
Supplementary File 5. Predicted targets of miR-185-5p, miR-1286 and miR-1306-5p in EMC10 3’UTR.
EMC10	hsa-miR-185-5p	predicted occupancy	hsa-miR-1306-5p	predicted occupancy	hsa-miR-1286	predicted occupancy
conserved site	8mer*	0.2091	-	-	-	-
poorly conserved site	7mer-A1**	0.2091	7mer-m8**	0.0082	7mer-A1***	0.0189
	-	-	-	-	7mer-A1***	0.0189
	-	-	-	-	7mer-A1***	0.0189
*conserved miRNA binding sites among mammals
**poorly conserved miRNA binding sites among human, chimp and rhesus
***poorly conserved miRNA binding sites among human and chimp
