# Supplementary material for: An antisense oligonucleotide-based strategy to ameliorate cognitive dysfunction in the 22q11.2 Deletion Syndrome
Source: eLife. 2025 May 27;13:RP103328. doi: 10.7554/eLife.103328 (PMC12113277; doi:10.7554/eLife.103328)
Supplement: Supplementary file 6. [file elife-103328-supp6.xlsx]

## Sheet: Supp File 6
Supplementary File 6. DEGs in NGN2-iNs (DIV21) from 22q11.2DS/SCZ (Q6) and control line (Q5) that were normalized ('rescued') in Q6 EM10 HET and Q6 EMC10 HOM lines. P values were corrected (adjusted pvalue) using the Benjamini–Hochberg false discovery rate.
237 genes rescued:																		382 genes rescued:
Q6 (22q11.2DS/SCZ) /Q5 (Ctrl)									Q6 EMC10 HET (22q11.2DS/SCZ) /Q5 (Ctrl)									Q6 (22q11.2DS/SCZ) /Q5 (Ctrl)									Q6 EMC10 HOM (22q11.2DS/SCZ) /Q5 (Ctrl)
Gene	baseMean	log2FoldChange	lfcSE	stat	pvalue	padj			Gene	baseMean	log2FoldChange	lfcSE	stat	pvalue	padj			Gene	baseMean	log2FoldChange	lfcSE	stat	pvalue	padj			Gene	baseMean	log2FoldChange	lfcSE	stat	pvalue	padj
AC006453.2	613.964	0.839242	0.120754	6.95	3.65275e-12	2.72818e-10			AC006453.2	459.727	0.141983	0.145478	0.975977	0.329076	0.579346			ABCD2	261.195	-0.960066	0.179008	-5.36325	8.17373e-08	3.53183e-06			ABCD2	347.421	0.115728	0.146617	0.789322	0.429924	0.690265
AC006453.4	35.1605	2.14127	0.43737	4.89578	9.79147e-07	3.32544e-05			AC006453.4	12.9278	0.0175448	0.724107	0.0242296	0.980669	0.992852			AC009690.1	504.959	-0.39084	0.131301	-2.97668	0.00291391	0.0364039			AC009690.1	489.119	-0.386121	0.16453	-2.34682	0.0189346	0.0881025
AC009690.1	504.959	-0.39084	0.131301	-2.97668	0.00291391	0.0364039			AC009690.1	553.832	-0.0716625	0.119676	-0.598805	0.549303	0.766654			AC019117.3	11.5023	-3.15395	1.03852	-3.03695	0.00238982	0.031028			AC019117.3	13.9095	-1.36942	2.08092	-0.658082	0.510486	0.755795
AC019117.3	11.5023	-3.15395	1.03852	-3.03695	0.00238982	0.031028			AC019117.3	12.9299	-1.96826	0.831908	-2.36596	0.0179832	0.0731952			AC026273.1	118.982	-1.86244	0.270929	-6.87425	6.23148e-12	4.55558e-10			AC026273.1	177.185	-0.0532863	0.203301	-0.262106	0.79324	0.914747
AC131097.2	10.8723	2.3236	0.78978	2.94208	0.00326015	0.0400623			AC131097.2	8.23637	1.83114	0.853968	2.14427	0.032011	0.114668			AC068446.1	56.8264	1.26481	0.380504	3.32403	0.000887255	0.0138157			AC068446.1	46.4505	0.903958	0.407963	2.21578	0.0267064	0.114431
AC133548.2	532.725	2.15131	0.137925	15.5977	7.54359e-55	4.6482e-52			AC133548.2	201.052	0.104512	0.191933	0.544522	0.586082	0.792057			AC073508.2	323.302	0.78763	0.178038	4.42395	9.69119e-06	0.000270554			AC073508.2	262.005	0.3322	0.188506	1.76228	0.0780227	0.245648
AC133551.1	12.7016	3.63178	1.03284	3.5163	0.000437605	0.00770842			AC133551.1	0.929744	-3.26561	3.61386	-0.903634	0.366189	NA			AC078927.1	8.42927	-6.46017	1.4415	-4.48157	7.40946e-06	0.000208881			AC078927.1	10.2648	-1.94985	1.10008	-1.77246	0.0763175	0.242226
AC135983.2	173.25	0.750792	0.222609	3.37269	0.000744377	0.0119922			AC135983.2	162.713	0.471356	0.23937	1.96915	0.0489358	0.158824			AC120036.3	26.2482	-2.04452	0.529334	-3.86244	0.000112261	0.00238234			AC120036.3	42.7741	0.133795	0.408546	0.327491	0.743296	0.891971
AC234783.1	236.439	0.466051	0.162675	2.86491	0.00417123	0.0485602			AC234783.1	210.788	0.189818	0.167894	1.13058	0.258231	0.502949			AC138932.1	1268	-0.669726	0.137656	-4.86521	1.14334e-06	3.80079e-05			AC138932.1	1393.41	-0.234262	0.147859	-1.58436	0.113112	0.315625
ACLY	38421	-0.181807	0.063177	-2.87774	0.00400532	0.0470274			ACLY	37770.1	-0.176944	0.0839297	-2.10824	0.0350102	0.122873			AC139769.1	300.854	0.514788	0.16241	3.16968	0.00152605	0.0215281			AC139769.1	272.436	0.367717	0.164298	2.23811	0.0252137	0.10936
ACSM3	39.4705	-1.12508	0.3865	-2.91094	0.00360343	0.0432336			ACSM3	48.5944	-0.114674	0.352963	-0.324891	0.745264	0.882549			AC234782.3	88.3321	0.991953	0.302271	3.28167	0.00103194	0.015563			AC234782.3	77.43	0.769994	0.324489	2.37294	0.017647	0.0836844
ACSS2	3378.31	-0.248662	0.081163	-3.06373	0.00218594	0.0291004			ACSS2	3322.4	-0.262472	0.106904	-2.45522	0.0140799	0.0600152			AC234783.1	236.439	0.466051	0.162675	2.86491	0.00417123	0.0485602			AC234783.1	202.629	0.152756	0.202378	0.754804	0.450366	0.707688
ADAMTS16	78.4775	1.22696	0.322691	3.80227	0.000143378	0.00296251			ADAMTS16	64.7621	0.442605	0.301567	1.46769	0.14219	0.3418			AC245060.4	875.895	-0.292308	0.092909	-3.14617	0.00165423	0.0230723			AC245060.4	866.163	-0.22129	0.0977395	-2.26408	0.0235694	0.104185
ADARB1	3766	0.231636	0.0720752	3.2138	0.00130989	0.0189435			ADARB1	3874.8	0.235928	0.105737	2.23127	0.0256632	0.0966057			AC256236.1	13.6795	-7.16712	1.37488	-5.2129	1.85913e-07	7.33996e-06			AC256236.1	25.0234	-0.169949	1.48409	-0.114514	0.90883	0.965353
ADM2	459.108	-0.602525	0.197901	-3.04458	0.00233005	0.0305801			ADM2	530.893	-0.0870429	0.145421	-0.598558	0.549468	0.766654			AC270277.2	15.5068	7.43821	1.32615	5.60889	2.03628e-08	9.52083e-07			AC270277.2	1.09117	3.65483	3.24718	1.12554	0.26036	NA
AGAP2	5909.11	-0.216467	0.0735528	-2.94301	0.00325037	0.0399705			AGAP2	6122.14	-0.0685442	0.0712761	-0.961672	0.336214	0.586039			ACSM3	39.4705	-1.12508	0.3865	-2.91094	0.00360343	0.0432336			ACSM3	42.0292	-0.144288	0.400359	-0.360396	0.718551	0.880252
AHRR	593.091	0.525183	0.137792	3.81141	0.000138179	0.00287392			AHRR	506.844	-0.172394	0.132749	-1.29865	0.194065	0.418694			ACSS2	3378.31	-0.248662	0.081163	-3.06373	0.00218594	0.0291004			ACSS2	3393.72	-0.105685	0.093424	-1.13124	0.257954	0.524136
AIFM1	2132.97	0.91198	0.0735956	12.3918	2.89581e-35	9.25212e-33			AIFM1	1491.49	0.0715536	0.0818384	0.874328	0.38194	0.630447			ADAMTS16	78.4775	1.22696	0.322691	3.80227	0.000143378	0.00296251			ADAMTS16	54.2344	0.108003	0.355293	0.303982	0.761142	0.900941
AKR1C2	1912.64	-0.401924	0.0789007	-5.09405	3.50489e-07	1.31742e-05			AKR1C2	2099.89	-0.0721841	0.0795623	-0.907266	0.364266	0.613761			ADARB1	3766	0.231636	0.0720752	3.2138	0.00130989	0.0189435			ADARB1	3600.08	0.079481	0.0717489	1.10777	0.267963	0.535818
AL121845.3	539.445	0.339444	0.117721	2.88346	0.0039333	0.0463532			AL121845.3	506.078	0.16996	0.146086	1.16343	0.244656	0.486589			ADCY3	2049.68	0.363321	0.107367	3.38393	0.000714558	0.0116195			ADCY3	1915.78	0.263585	0.107772	2.44576	0.0144546	0.0717763
ALDOC	867.056	-0.306525	0.106282	-2.88407	0.00392574	0.0462958			ALDOC	989.951	0.124301	0.118883	1.04557	0.295758	0.543886			ADRA2A	306.012	0.668464	0.228333	2.92759	0.00341598	0.0416214			ADRA2A	264.736	0.395862	0.194568	2.03457	0.0418945	0.159017
AMMECR1	176.347	0.703257	0.244315	2.87849	0.00399585	0.0469622			AMMECR1	174.17	0.3903	0.236808	1.64817	0.0993185	0.26629			AL109918.1	630.515	0.563196	0.117102	4.80947	1.51331e-06	4.9449e-05			AL109918.1	541.746	0.236332	0.125356	1.88529	0.0593907	0.203414
ANKFN1	137.72	0.72055	0.226129	3.18645	0.0014403	0.0205198			ANKFN1	110.125	0.0569005	0.240733	0.236363	0.813151	0.918182			AL121845.3	539.445	0.339444	0.117721	2.88346	0.0039333	0.0463532			AL121845.3	511.354	0.264795	0.133208	1.98782	0.0468314	0.171984
ANKRD20A2	29.4412	-1.70442	0.546548	-3.11852	0.00181763	0.0249856			ANKRD20A2	27.8955	-1.84136	0.830875	-2.21616	0.0266802	0.0994813			ALDOC	867.056	-0.306525	0.106282	-2.88407	0.00392574	0.0462958			ALDOC	895.095	-0.0982697	0.109708	-0.89574	0.370392	0.637541
ANKRD20A5P	25.2162	-1.87479	0.523027	-3.58449	0.000337741	0.0061924			ANKRD20A5P	26.0236	-1.21849	0.481811	-2.52899	0.0114392	0.0508859			AMMECR1	176.347	0.703257	0.244315	2.87849	0.00399585	0.0469622			AMMECR1L	2620.3	-0.0123474	0.0691734	-0.1785	0.85833	0.945029
ANKRD36BP2	526.62	0.346403	0.118774	2.91648	0.00354004	0.0428605			ANKRD36BP2	514.772	0.220424	0.118408	1.86155	0.0626659	0.190978			ANGPT2	137.541	-0.901262	0.25844	-3.48731	0.000487904	0.00840101			ANGPT2	153.381	-0.330213	0.205216	-1.6091	0.107595	0.305877
AP1S3	284.733	-0.620714	0.167797	-3.6992	0.000216281	0.00420688			AP1S3	290.821	-0.296786	0.159628	-1.85924	0.0629937	0.19168			ANKRD20A7P	8.05104	-6.39523	1.4532	-4.40078	1.07862e-05	0.000298936			ANKRD20A7P	7.78806	-6.29922	1.46387	-4.30312	1.68409e-05	NA
APC	42604.1	0.406839	0.0759028	5.36	8.32216e-08	3.5806e-06			APC	35451.2	-0.0744859	0.0796864	-0.934738	0.349923	0.599709			ANKRD36BP2	526.62	0.346403	0.118774	2.91648	0.00354004	0.0428605			ANKRD36BP2	517.588	0.244537	0.141649	1.72636	0.0842822	0.258809
APOLD1	73.4829	-1.05486	0.307152	-3.43433	0.000594011	0.00991148			APOLD1	81.7976	-0.166662	0.280936	-0.59324	0.553021	0.769312			ANKRD55	41.0083	-1.69273	0.512585	-3.30235	0.000958798	0.0147566			ANKRD55	47.5633	-0.897247	0.453705	-1.9776	0.0479737	0.174866
ARHGAP27	433.981	0.473444	0.13887	3.40927	0.000651368	0.0107029			ARHGAP27	399.198	0.15932	0.152506	1.04468	0.29617	0.544352			ANO2	143.116	-0.757827	0.252778	-2.99799	0.00271766	0.0344005			ANO2	163.168	-0.15333	0.226818	-0.676004	0.499038	0.745745
ARL4A	576.996	-0.354214	0.108837	-3.25455	0.0011357	0.0168191			ARL4A	641.488	-0.00130541	0.0987868	-0.0132144	0.989457	0.996273			AP001458.2	6.45511	-6.05983	1.58049	-3.83415	0.000125997	0.002651			AP001458.2	6.24281	-5.96354	1.57798	-3.77922	0.000157317	NA
ASS1	556.949	-0.816549	0.209034	-3.9063	9.37203e-05	0.00201365			ASS1	728.467	0.0894751	0.0946836	0.94499	0.344664	0.594962			AP002956.1	1462.45	-0.36948	0.0805683	-4.58593	4.51977e-06	0.000133986			AP002956.1	1616.83	0.0739009	0.0959827	0.76994	0.441336	0.699768
ATG12	3547.21	0.192128	0.0607621	3.16197	0.00156703	0.0219984			ATG12	3484.48	0.0746162	0.0622797	1.19808	0.230885	0.469172			APOL2	211.167	-1.31659	0.182499	-7.21423	5.42382e-13	4.43493e-11			APOL2	257.795	-0.258015	0.171383	-1.50549	0.132198	0.347411
ATG4A	1485.95	0.37979	0.0853293	4.45087	8.55219e-06	0.000240311			ATG4A	1343.97	0.153349	0.0836982	1.83217	0.0669261	0.20071			APOLD1	73.4829	-1.05486	0.307152	-3.43433	0.000594011	0.00991148			APOLD1	86.0264	-0.249221	0.275093	-0.905952	0.364961	0.632227
ATP6AP1L	192.009	-0.555896	0.184242	-3.01721	0.00255114	0.0326519			ATP6AP1L	188.381	-0.431473	0.170902	-2.52468	0.0115805	0.0513931			ARID5B	648.739	0.407874	0.120184	3.39374	0.000689442	0.0112642			ARID5B	571.006	0.110995	0.123226	0.900748	0.367722	0.634439
ATP6AP2	15066.2	0.240289	0.0633679	3.79196	0.000149464	0.00307721			ATP6AP2	11007.7	-0.688657	0.0562425	-12.2444	1.8e-34	2.34e-32			ARL4A	576.996	-0.354214	0.108837	-3.25455	0.0011357	0.0168191			ARL4A	599.776	-0.0895225	0.115026	-0.778282	0.436403	0.695875
ATXN2L	10627.3	-0.327349	0.111599	-2.93327	0.00335416	0.040984			ATXN2L	10839.2	-0.211502	0.0939817	-2.25046	0.0244198	0.092934			ASCC3	2680.97	0.398745	0.0746653	5.34042	9.27293e-08	3.90209e-06			ASCC3	2556.77	0.186611	0.0871601	2.14101	0.0322729	0.131343
B3GALNT2	470.573	-0.4013	0.131368	-3.05477	0.0022523	0.0298226			B3GALNT2	454.204	-0.323537	0.128445	-2.51888	0.0117729	0.0520571			ASPH	1303.37	0.275103	0.0886912	3.10181	0.00192339	0.0261705			ASPH	1209.2	0.22993	0.0955344	2.40678	0.0160938	0.0780514
BAG6	17058	-0.171241	0.0588392	-2.91031	0.00361065	0.0432902			BAG6	17204.4	-0.121459	0.0521976	-2.32691	0.01997	0.0793638			ATP1B1	19425	-0.245437	0.0538112	-4.56108	5.08908e-06	0.000148064			ATP1B1	20278.2	-0.0259995	0.0658118	-0.395058	0.6928	0.868103
BEX2	8600.27	0.635507	0.0699102	9.09033	9.87349e-20	1.27761e-17			BEX2	6942.88	0.116412	0.0575749	2.02193	0.0431838	0.144861			ATXN7L2	2519.43	0.244436	0.0723403	3.37898	0.000727554	0.0117753			ATXN7L2	2369.98	0.177052	0.0749475	2.36234	0.01816	0.0853095
BEX3	18498.6	0.531751	0.0676013	7.86598	3.66219e-15	3.49082e-13			BEX3	13558.2	-0.306234	0.0574202	-5.33321	9.65e-08	1.51e-06			B3GALNT2	470.573	-0.4013	0.131368	-3.05477	0.0022523	0.0298226			B3GALNT2	456.88	-0.0485129	0.138588	-0.350052	0.7263	0.884072
BEX5	1897.21	0.346655	0.0870896	3.98044	6.87881e-05	0.00152574			BEX5	1245.64	-0.982431	0.09061	-10.8424	2.17e-27	1.91e-25			BAG4	1738.27	0.252302	0.0775648	3.25279	0.00114278	0.0168901			BAG4	1624.61	0.138323	0.0778912	1.77585	0.0757583	0.241142
BMS1P8	200.893	3.44243	0.305343	11.274	1.76377e-29	4.16853e-27			BMS1P8	42.0898	0.451829	0.490155	0.921808	0.356629	0.606674			BBS2	1970.78	-0.327521	0.101254	-3.23463	0.001218	0.0177936			BBS2	1866.19	-0.19693	0.0976469	-2.01676	0.0437211	0.163487
BTBD6	2097.96	-0.227219	0.0728663	-3.11831	0.00181893	0.0249856			BTBD6	2144.8	-0.125285	0.0709851	-1.76495	0.0775728	0.223033			BCL11A	392.44	0.630807	0.194014	3.25135	0.00114857	0.0169284			BCL11A	356.644	0.398223	0.16946	2.34995	0.0187759	0.0876329
BTNL9	2053.66	0.518701	0.104036	4.98578	6.17136e-07	2.20444e-05			BTNL9	1738.39	0.0278276	0.1182	0.235428	0.813876	0.918761			BEX2	8600.27	0.635507	0.0699102	9.09033	9.87349e-20	1.27761e-17			BEX2	6208.2	-0.13807	0.0674044	-2.04838	0.0405225	0.155407
C2CD6	6.87926	5.87995	2.01779	2.91405	0.0035677	0.0430007			C2CD6	0.63362	2.81639	3.54755	0.793897	0.427255	NA			BEX3	18498.6	0.531751	0.0676013	7.86598	3.66219e-15	3.49082e-13			BEX3	14773	0.0310724	0.0836709	0.371365	0.710366	0.875878
C3orf70	3386.83	0.325282	0.0969085	3.35659	0.000789108	0.0125238			C3orf70	2923.35	-0.0505631	0.0618872	-0.817021	0.413916	0.659469			BMP8B	84.0039	1.20811	0.294616	4.10064	4.12013e-05	0.000988659			BMP8B	66.1665	0.763274	0.328121	2.3262	0.0200081	0.0921106
CABLES2	1896.52	-0.269887	0.0866264	-3.11552	0.00183619	0.0251427			CABLES2	1903.87	-0.21038	0.089745	-2.3442	0.019068	0.0765184			BTBD6	2097.96	-0.227219	0.0728663	-3.11831	0.00181893	0.0249856			BTBD6	2118.94	-0.0885191	0.0828722	-1.06814	0.285457	0.552986
CAMKV	5028.42	0.267617	0.0898624	2.97807	0.0029007	0.0362913			CAMKV	4634.67	0.0659158	0.0873279	0.754808	0.450364	0.68989			C12orf4	1752.71	-0.237185	0.0827454	-2.86644	0.00415112	0.0483914			C12orf4	1712.18	-0.182893	0.0793489	-2.30492	0.0211712	0.0961198
CASP3	3098.69	-0.24331	0.072442	-3.35869	0.000783134	0.0124529			CASP3	3345.5	0.012614	0.0758262	0.166354	0.867878	0.944984			C2CD6	6.87926	5.87995	2.01779	2.91405	0.0035677	0.0430007			C2CD6	0	NA	NA	NA	NA	NA
CAST	1456.28	-0.274166	0.0841247	-3.25904	0.00111792	0.0165985			CAST	1479.72	-0.0530735	0.0755324	-0.702658	0.482269	0.716552			C7orf31	373.961	-0.609098	0.154802	-3.93469	8.33057e-05	0.00180789			C7orf31	384.011	-0.37202	0.148834	-2.49957	0.0124344	0.0638051
CCDC7	187.085	-0.58859	0.18436	-3.19261	0.00140993	0.0201704			CCDC7	183.663	-0.499581	0.210697	-2.37109	0.0177359	0.0724388			CACNA1B	12131.8	-0.343438	0.0726394	-4.72799	2.26758e-06	7.23152e-05			CACNA1B	12568.6	-0.133303	0.0654843	-2.03564	0.0417862	0.158824
CDHR1	4933.75	-0.240478	0.0778454	-3.08918	0.00200708	0.0270956			CDHR1	4807.33	-0.182623	0.106055	-1.72196	0.0850762	0.23784			CACNG7	7832.92	0.305608	0.0743336	4.1113	3.93438e-05	0.000949368			CACNG7	7236.37	0.160747	0.0627544	2.56153	0.0104212	0.0559242
CDON	1242.85	0.338418	0.0882406	3.83517	0.000125476	0.00264327			CDON	1196.7	0.212717	0.0848074	2.50824	0.0121333	0.0532847			CARD9	120.433	-0.752403	0.247054	-3.0455	0.00232292	0.0305671			CARD9	134.17	-0.331528	0.232375	-1.4267	0.153668	0.381872
CEBPB	185.483	-0.653015	0.193469	-3.37529	0.000737375	0.0119008			CEBPB	200.753	-0.34422	0.181315	-1.89847	0.0576345	0.179543			CAST	1456.28	-0.274166	0.0841247	-3.25904	0.00111792	0.0165985			CAST	1548.51	0.0466742	0.0865249	0.539431	0.58959	0.807607
CEP41	2368.84	-0.33008	0.0772278	-4.27411	1.91899e-05	0.000494893			CEP41	2435.75	-0.123781	0.0710343	-1.74256	0.0814108	0.230692			CBX5	23094.3	0.18586	0.0578931	3.21039	0.00132553	0.0191376			CBX5	20922.1	-0.0237052	0.071358	-0.332202	0.739737	0.890182
CILP2	346.771	-0.579989	0.157123	-3.69129	0.000223116	0.00431066			CILP2	364.899	-0.368063	0.159008	-2.31475	0.0206266	0.0814805			CC2D2A	762.934	0.381254	0.113606	3.35593	0.000790975	0.0125314			CC2D2A	719.939	0.304657	0.140022	2.17578	0.0295716	0.123524
CLCN3	10209.9	-0.173171	0.0572678	-3.02387	0.0024956	0.0321798			CLCN3	10530.7	-0.018282	0.0532948	-0.343036	0.731571	0.875776			CCDC7	187.085	-0.58859	0.18436	-3.19261	0.00140993	0.0201704			CCDC7	184.514	-0.48203	0.190453	-2.53097	0.0113749	0.0598181
CNPY1	11.5024	-2.24203	0.763859	-2.93514	0.00333397	0.0407951			CNPY1	12.5721	0.145176	0.752529	0.192917	0.847024	0.935057			CCNA1	1134	-0.424567	0.103311	-4.1096	3.96349e-05	0.000953725			CCNA1	1236.47	-0.0461798	0.0875161	-0.527672	0.597727	0.812993
CNTNAP5	3103	-0.292583	0.100342	-2.91585	0.00354721	0.0429173			CNTNAP5	3326.7	0.0218883	0.0958916	0.22826	0.819444	0.921405			CCND2	942.777	0.998612	0.204706	4.87828	1.07015e-06	3.57815e-05			CCND2	666.03	0.262254	0.176908	1.48243	0.138226	0.356778
CPSF1	6271.58	0.28029	0.0685315	4.08994	4.31482e-05	0.00103108			CPSF1	5954.78	0.124756	0.0778667	1.60217	0.109118	0.285088			CCR10	186.376	-0.694768	0.195801	-3.54833	0.000387676	0.00700374			CCR10	195.869	-0.311663	0.19846	-1.57041	0.116321	0.321449
CTXN3	88.6055	1.20346	0.278177	4.32623	1.51683e-05	0.000401824			CTXN3	63.8752	0.504059	0.323966	1.5559	0.119732	0.304571			CD99L2	7178.42	-0.577656	0.0649452	-8.89452	5.86741e-19	7.12891e-17			CD99L2	9113.33	0.247805	0.0632814	3.91592	9.00619e-05	0.00110828
CU457734.2	933.336	-0.359887	0.0970522	-3.70818	0.000208758	0.00410217			CU457734.2	981.414	-0.229579	0.114283	-2.00886	0.044552	0.148102			CDH7	1123.19	0.76862	0.126661	6.06831	1.29263e-09	7.03527e-08			CDH7	937.908	0.262773	0.101464	2.58981	0.0096029	0.0524468
CYGB	1467.74	-0.384268	0.100418	-3.82668	0.000129884	0.00272283			CYGB	1569.14	-0.132649	0.0941882	-1.40834	0.159031	0.368213			CDH8	872.965	0.567998	0.196706	2.88755	0.00388251	0.0460062			CDH8	768.06	0.387829	0.182475	2.12538	0.033555	0.135175
CYP2U1	1017.69	0.287896	0.0889684	3.23593	0.00121248	0.0177278			CYP2U1	980.428	0.222811	0.0932389	2.38968	0.0168631	0.0695486			CDHR1	4933.75	-0.240478	0.0778454	-3.08918	0.00200708	0.0270956			CDHR1	5173.9	0.00107958	0.100724	0.0107181	0.991448	0.996919
DAB2	75.1323	-1.04777	0.306664	-3.41667	0.00063391	0.0104607			DAB2	120.983	0.360988	0.264935	1.36256	0.173023	0.388856			CDON	1242.85	0.338418	0.0882406	3.83517	0.000125476	0.00264327			CDON	1159.28	0.203926	0.0993087	2.05346	0.0400284	0.154009
DDIT4	1303.8	-0.48069	0.0988428	-4.86317	1.15518e-06	3.83276e-05			DDIT4	1405.14	-0.222316	0.0897635	-2.47668	0.013261	0.0572283			CEACAM21	36.4961	1.38132	0.44278	3.11966	0.00181061	0.0249111			CEACAM21	33.2459	1.09732	0.49935	2.19749	0.0279855	0.118326
DNAH6	230.93	-0.783201	0.236149	-3.31655	0.000911374	0.0141275			DNAH6	269.085	-0.381081	0.18958	-2.01014	0.0444167	0.147765			CELF5	15130.4	0.153329	0.0530701	2.88917	0.00386259	0.045833			CELF5	14425.5	0.104074	0.0582412	1.78694	0.0739473	0.237285
DNMT3B	345.499	-0.591844	0.148745	-3.97893	6.92275e-05	0.00153323			DNMT3B	362.644	-0.343034	0.141867	-2.418	0.0156061	0.0651698			CENPBD1P1	6689.03	-0.213017	0.0606211	-3.51391	0.000441556	0.0077509			CENPBD1P1	6748.01	-0.106607	0.0596755	-1.78645	0.0740271	0.237358
DNPEP	585.726	0.331231	0.115511	2.86752	0.00413703	0.0482712			DNPEP	572.93	0.119858	0.12883	0.930356	0.352187	0.601897			CHN2	4235.54	-0.376806	0.118284	-3.18561	0.0014445	0.0205627			CHN2	4377.09	-0.157445	0.0733726	-2.14583	0.0318862	0.130184
DOK5	1522.13	-0.571533	0.112134	-5.09688	3.45291e-07	1.30072e-05			DOK5	1668.98	-0.214157	0.109572	-1.95447	0.0506451	0.163006			CHRNA5	1371.99	0.446412	0.14465	3.08615	0.00202767	0.0273307			CHRNA5	1268.8	0.294254	0.133075	2.21119	0.0270225	0.115488
DRP2	1159.38	0.326806	0.113271	2.88518	0.00391191	0.0461642			DRP2	1007.48	-0.0161571	0.114865	-0.140661	0.888137	0.952867			CHURC1	2932.74	-0.25278	0.0758142	-3.3342	0.000855448	0.0134148			CHURC1	2829.02	-0.186273	0.0730024	-2.5516	0.0107231	0.0571933
DUSP5P1	46.0392	1.0484	0.359217	2.91858	0.00351624	0.0426623			DUSP5P1	36.285	0.521398	0.390137	1.33645	0.181403	0.401215			CILP2	346.771	-0.579989	0.157123	-3.69129	0.000223116	0.00431066			CILP2	384.787	-0.126398	0.150995	-0.837102	0.402535	0.666002
DYNC2LI1	663.894	0.357536	0.120717	2.96177	0.00305877	0.0379934			DYNC2LI1	635.738	0.28011	0.115082	2.434	0.0149332	0.0628794			CKAP2	1111.93	0.349437	0.0964412	3.62332	0.000290843	0.00543653			CKAP2	1015.14	0.241022	0.0992514	2.4284	0.0151654	0.0745491
ECEL1	998.479	-0.649546	0.174208	-3.72857	0.000192573	0.00381892			ECEL1	1323.93	0.229499	0.152668	1.50326	0.132772	0.326011			CKB	9833.98	-0.25974	0.060419	-4.29898	1.71583e-05	0.000450581			CKB	9794.68	-0.169407	0.0667589	-2.5376	0.0111616	0.0590019
EIF2S2	4714.39	-0.249154	0.0778479	-3.20052	0.00137179	0.0197721			EIF2S2	4793.49	-0.164879	0.0728322	-2.26382	0.023585	0.0903989			CLOCK	1279.52	0.520446	0.138097	3.7687	0.000164101	0.00332694			CLOCK	1110.14	0.0799109	0.141012	0.566695	0.570922	0.797033
EMX1	38.4683	2.191	0.446192	4.91045	9.08692e-07	3.14813e-05			EMX1	18.6662	0.745332	0.570509	1.30643	0.191405	0.415083			CNN2	330.961	0.856912	0.18462	4.64149	3.45901e-06	0.000105067			CNN2	259.169	0.438186	0.192907	2.27149	0.0231176	0.10268
EN1	9.58469	-3.47552	0.997635	-3.48376	0.000494416	0.00850465			EN1	11.9299	-1.58	0.683513	-2.3116	0.0208	0.0818894			CNOT9	3097.4	0.234145	0.0771113	3.03646	0.00239375	0.0310521			CNOT9	2913.51	0.199648	0.0793004	2.51762	0.011815	0.0615558
EN2	16.3246	-4.14888	0.897392	-4.62326	3.77756e-06	0.000113544			EN2	22.0717	-1.21375	0.734868	-1.65166	0.0986032	0.264894			CNPY1	11.5024	-2.24203	0.763859	-2.93514	0.00333397	0.0407951			CNPY1	10.4796	-1.4449	0.84523	-1.70948	0.0873626	0.26498
EYA3	2227.54	0.245153	0.082338	2.9774	0.002907	0.0363438			EYA3	2107.62	0.127881	0.0843438	1.51618	0.129473	0.321187			CNR1	11292.6	0.351754	0.0859272	4.09363	4.24669e-05	0.0010162			CNR1	10426.4	0.128003	0.0830062	1.54209	0.123053	0.333075
F8A1	623.332	-0.333687	0.111959	-2.98044	0.00287835	0.0360379			F8A1	647.532	-0.180246	0.108978	-1.65396	0.0981354	0.263937			COPS7A	1406.76	-0.38695	0.0837584	-4.61984	3.84036e-06	0.000114831			COPS7A	1443.27	-0.164914	0.0951459	-1.73328	0.0830465	0.25634
FAAH	1689.9	0.260772	0.0824696	3.16204	0.00156667	0.0219984			FAAH	1590.92	0.081236	0.0716871	1.1332	0.257129	0.50158			CPLX1	2244.23	-0.358392	0.0879821	-4.07346	4.63192e-05	0.00109602			CPLX1	2323.96	-0.147899	0.0848489	-1.74309	0.0813178	0.252222
FANCE	648.896	0.334571	0.116951	2.86078	0.00422595	0.0490648			FANCE	624.592	0.263718	0.115662	2.28008	0.0226027	0.0873725			CPT1A	805.644	-0.353701	0.107397	-3.29338	0.00098989	0.0151004			CPT1A	1112.75	0.559593	0.0909391	6.15349	7.57975e-10	2.60897e-08
FAT4	320.974	0.616525	0.18938	3.25549	0.00113196	0.0167782			FAT4	311.424	0.276724	0.150482	1.83891	0.0659284	0.198492			CRABP2	453.321	0.768289	0.254834	3.01486	0.00257099	0.032833			CRABP2	304.212	-0.20765	0.154684	-1.34242	0.179461	0.420987
FBLIM1	1954.83	0.277017	0.0854468	3.24198	0.00118703	0.0174228			FBLIM1	1857.27	-0.0119973	0.0781103	-0.153594	0.87793	0.949213			CRIM1	2326.77	0.383765	0.133761	2.86904	0.00411726	0.0480941			CRIM1	1850.04	-0.21267	0.0998743	-2.12937	0.0332236	0.134226
FBLN1	703.36	0.326147	0.102319	3.18755	0.00143483	0.0204757			FBLN1	663.085	0.193121	0.0973595	1.98359	0.0473015	0.154826			CRLF2	158.773	0.673684	0.217887	3.0919	0.00198877	0.0269116			CRLF2	141.944	0.486135	0.221164	2.19807	0.027944	0.118271
FDPS	8992.29	-0.191667	0.0668425	-2.86744	0.00413801	0.0482712			FDPS	9118.71	-0.116588	0.0715666	-1.62909	0.103294	0.274124			CSRP1	2431.23	-0.44905	0.0847581	-5.29802	1.17066e-07	4.82299e-06			CSRP1	2532.9	-0.1921	0.0794825	-2.41688	0.0156541	0.0762973
FLT3	114.796	0.877997	0.231486	3.79288	0.000148913	0.00306952			FLT3	99.5817	0.556429	0.229384	2.42575	0.0152769	0.0640618			CTBP2P4	9.33321	-3.33154	1.06651	-3.12376	0.00178554	0.0246063			CTBP2P4	9.46917	-2.72923	1.05921	-2.57668	0.0099755	0.0540909
FOXD4	356.98	0.500781	0.141737	3.53317	0.000410605	0.00731079			FOXD4	320.816	0.251958	0.143603	1.75455	0.0793361	0.22647			CTHRC1	218.211	-0.767895	0.186329	-4.12117	3.76956e-05	0.000912149			CTHRC1	238.423	-0.27437	0.171523	-1.59961	0.109686	0.309938
FRG1CP	1301.84	0.42054	0.0903398	4.65509	3.23841e-06	9.92402e-05			FRG1CP	974.245	-0.42039	0.0917645	-4.58118	4.62e-06	5.4e-05			CTNNA1	6788.55	-0.368587	0.121843	-3.02511	0.00248545	0.0320729			CTNNA1	6742.07	-0.202464	0.10012	-2.02222	0.0431539	0.161985
GABRG1	75.1993	1.01935	0.302889	3.36544	0.000764215	0.0122083			GABRG1	64.8453	0.716069	0.319394	2.24196	0.0249641	0.0945377			CTXN3	88.6055	1.20346	0.278177	4.32623	1.51683e-05	0.000401824			CTXN3	51.5381	-0.00371849	0.365896	-0.0101627	0.991891	0.996919
GRM4	1034.9	-0.353216	0.0953313	-3.70514	0.000211276	0.00412813			GRM4	1075.82	-0.191726	0.0861736	-2.22488	0.0260895	0.097877			CU457734.2	933.336	-0.359887	0.0970522	-3.70818	0.000208758	0.00410217			CU457734.2	957.782	-0.275286	0.115275	-2.38807	0.0169372	0.0812643
HERC2P5	94.4642	1.68922	0.302638	5.58165	2.3825e-08	1.10498e-06			HERC2P5	34.3382	-0.284351	0.537886	-0.528645	0.597052	0.798039			CYGB	1467.74	-0.384268	0.100418	-3.82668	0.000129884	0.00272283			CYGB	1486.26	-0.237957	0.097693	-2.43576	0.0148606	0.0733327
HERC2P8	91.3868	1.74587	0.330356	5.28479	1.25847e-07	5.12086e-06			HERC2P8	33.8297	-0.285765	0.552734	-0.517002	0.605155	0.803828			CYP27C1	650.251	0.512522	0.145285	3.5277	0.000419188	0.00744564			CYP27C1	596.531	0.371074	0.143021	2.59454	0.00947177	0.0519183
HHIPL2	6.36572	3.22343	1.04412	3.08722	0.0020204	0.0272541			HHIPL2	3.75024	1.55492	1.27589	1.2187	0.222959	NA			DBNDD1	6621.41	-0.204588	0.0706084	-2.8975	0.0037615	0.0448495			DBNDD1	6794.16	-0.0263267	0.0690443	-0.381301	0.70298	0.872987
HLA-DRB3	15.1709	2.01527	0.678667	2.96945	0.00298334	0.0371635			HLA-DRB3	12.8327	1.72939	0.724184	2.38805	0.0169378	0.0697591			DCBLD1	166.968	0.68631	0.207535	3.30697	0.000943121	0.0145543			DCBLD1	128.667	0.0357738	0.231815	0.15432	0.877357	0.952217
HMGB3	7096.83	-0.270494	0.080351	-3.3664	0.000761548	0.0121996			HMGB3	7332.67	-0.109854	0.0699995	-1.56935	0.116565	0.298459			DECR1	511.009	0.547368	0.144836	3.77924	0.000157311	0.00320813			DECR1	456.658	0.347548	0.145969	2.38097	0.0172673	0.0824909
HPX	154.931	0.702395	0.222077	3.16284	0.00156237	0.0219867			HPX	148.374	0.30698	0.273933	1.12064	0.262443	0.508134			DES	31.1894	-1.81556	0.519844	-3.49252	0.000478494	0.00828029			DES	21.3109	-3.51868	1.73359	-2.02971	0.0423863	0.160282
HR	405.416	0.442361	0.138988	3.18273	0.00145892	0.0207166			HR	344.323	0.0560721	0.145036	0.386608	0.699047	0.85816			DHCR7	7024.59	-0.309565	0.0909979	-3.4019	0.0006692	0.0109542			DHCR7	7168.62	-0.199726	0.0876102	-2.27971	0.022625	0.101167
HSF4	590.224	0.516995	0.140157	3.68869	0.000225413	0.00434046			HSF4	549.522	0.293849	0.15313	1.91895	0.0549903	0.173352			DMD	1115.48	0.514287	0.0957478	5.37127	7.81848e-08	3.39779e-06			DMD	1070.83	0.23678	0.0930931	2.54347	0.0109757	0.0582388
HSPB1	532.611	-0.497068	0.136323	-3.64625	0.0002661	0.005023			HSPB1	594.265	-0.0956496	0.109935	-0.870058	0.384269	0.632461			DNPEP	585.726	0.331231	0.115511	2.86752	0.00413703	0.0482712			DNPEP	576.516	0.249109	0.116812	2.13256	0.032961	0.133468
HSPE1-MOB4	230.515	0.550195	0.190038	2.89517	0.00378947	0.0451056			HSPE1-MOB4	208.427	0.321045	0.174965	1.83491	0.0665184	0.199758			DPH3	4078.69	-0.244918	0.0665617	-3.67956	0.000233633	0.00447875			DPH3	4181.09	-0.0863908	0.0656646	-1.31564	0.188296	0.434117
HTR3B	590.777	0.479861	0.145664	3.29429	0.000986699	0.0150779			HTR3B	508.267	-0.0262087	0.219748	-0.119267	0.905064	0.961045			DRD2	2108.93	0.4708	0.140934	3.34057	0.000836055	0.013161			DRD2	1648.55	-0.175359	0.0892723	-1.96431	0.049494	0.178722
HYDIN2	80.867	1.07937	0.327673	3.29405	0.000987542	0.0150779			HYDIN2	65.9359	0.572573	0.330364	1.73316	0.0830678	0.233968			DSC2	482.761	-0.439247	0.15028	-2.92286	0.00346835	0.0421108			DSC2	495.278	-0.291537	0.137229	-2.12446	0.0336318	0.135448
ID1	61.3848	2.05858	0.385303	5.34276	9.15407e-08	3.87096e-06			ID1	37.1677	1.08431	0.432708	2.50586	0.0122154	0.0535521			DUSP10	761.868	0.384118	0.127647	3.00922	0.00261918	0.0333896			DUSP10	616.278	-0.193624	0.122699	-1.57804	0.114556	0.318267
IER3	111.494	-0.894769	0.259167	-3.45248	0.000555459	0.00937703			IER3	144.3	0.00747404	0.232817	0.0321027	0.97439	0.990009			ECEL1	998.479	-0.649546	0.174208	-3.72857	0.000192573	0.00381892			ECEL1	1147.28	-0.0860447	0.156085	-0.551267	0.581451	0.801862
IFI6	99.3059	-0.781434	0.25655	-3.04594	0.00231957	0.0305492			IFI6	109.044	-0.417415	0.354466	-1.17759	0.238961	0.48012			EEF1AKMT4-ECE2	88.9892	-1.15249	0.391057	-2.94712	0.00320753	0.0396082			EEF1AKMT4-ECE2	103.223	-0.432869	0.355044	-1.2192	0.222769	0.479288
IGHMBP2	1421.45	0.323662	0.0872981	3.70755	0.000209271	0.00410291			IGHMBP2	1321.55	-0.0142804	0.122531	-0.116546	0.90722	0.961651			EEF1DP4	8.40587	-4.55107	1.28592	-3.53917	0.000401393	0.0071764			EEF1DP4	17.1476	0.256998	0.581975	0.441597	0.658781	0.848813
IL17RA	528.861	0.718796	0.137432	5.23018	1.69345e-07	6.73203e-06			IL17RA	358.23	-0.318662	0.156789	-2.03242	0.0421107	0.142205			EHHADH	139.045	-0.855641	0.245274	-3.48851	0.00048573	0.00838868			EHHADH	127.927	-0.538465	0.238229	-2.26028	0.023804	0.105055
INSIG1	5604.7	-0.201133	0.0660471	-3.0453	0.00232447	0.0305671			INSIG1	5678.23	-0.114888	0.0818034	-1.40444	0.160187	0.370073			EPHB1	1944.7	0.458075	0.128853	3.55503	0.000377943	0.00684224			EPHB1	1676.96	0.201151	0.0893634	2.25093	0.0243898	0.107072
IRAK1BP1	480.748	-0.451044	0.15079	-2.99122	0.00277868	0.0349421			IRAK1BP1	473.351	-0.327677	0.141439	-2.31673	0.0205186	0.0811428			EPN1	7886.05	-0.198481	0.0652289	-3.04284	0.00234356	0.0306489			EPN1	7725.76	-0.163591	0.0768544	-2.12858	0.0332892	0.134426
ITGA7	5371.97	0.456936	0.0715566	6.38565	1.7067e-10	1.03682e-08			ITGA7	4751.22	0.155311	0.0694174	2.23735	0.0252632	0.0954452			ERV3-1	1181.18	-0.516613	0.09971	-5.18116	2.20513e-07	8.6075e-06			ERV3-1	1384.62	0.0927097	0.113142	0.81941	0.412552	0.67394
KLF3	1716.89	-0.317444	0.0847321	-3.74644	0.000179361	0.00360247			KLF3	1814.37	-0.149194	0.0731067	-2.04077	0.0412741	0.139807			ESRRG	740.646	0.825097	0.218485	3.77645	0.000159081	0.00322896			ESRRG	569.797	0.339735	0.151229	2.2465	0.0246719	0.107701
LACC1	1106.47	0.386933	0.113287	3.41551	0.000636619	0.0104905			LACC1	1020.91	0.207047	0.1236	1.67514	0.0939067	0.255853			EXT1	1084.55	0.391714	0.0963804	4.06425	4.81862e-05	0.00112956			EXT1	1005.68	0.236138	0.10224	2.30965	0.0209075	0.0952557
LAMA2	139.693	-0.952344	0.312574	-3.04678	0.00231307	0.030487			LAMA2	149.674	-0.410487	0.3098	-1.325	0.18517	0.406646			EYA3	2227.54	0.245153	0.082338	2.9774	0.002907	0.0363438			EYA3	2028.45	-0.0030089	0.100434	-0.0299589	0.9761	0.991365
LGALS3BP	3729.29	-0.205628	0.0623845	-3.29614	0.000980239	0.0150196			LGALS3BP	3943.9	-0.0273982	0.0860969	-0.318226	0.750314	0.88508			EYS	151.66	1.01312	0.222168	4.56018	5.11092e-06	0.000148449			EYS	138.163	0.732755	0.283013	2.58913	0.00962201	0.0525339
LHX2	78.5559	1.4672	0.307294	4.77459	1.80072e-06	5.80707e-05			LHX2	48.5506	0.201112	0.489708	0.410678	0.681309	0.848282			EZR	1531.36	-0.415112	0.133152	-3.11759	0.00182338	0.0250269			EZR	1773.09	0.145401	0.0814	1.78625	0.0740592	0.237389
LMO2	414.958	-0.596743	0.168236	-3.54706	0.000389548	0.00701553			ELMO2	3813.79	-0.0488927	0.0644194	-0.758975	0.447867	0.688091			F8A1	623.332	-0.333687	0.111959	-2.98044	0.00287835	0.0360379			F8A1	640.997	-0.140669	0.116172	-1.21087	0.225946	0.483351
LOXL3	221.346	0.752362	0.197699	3.80559	0.000141464	0.00293351			LOXL3	190.77	0.289348	0.230894	1.25316	0.210146	0.441172			FAAH	1689.9	0.260772	0.0824696	3.16204	0.00156667	0.0219984			FAAH	1657.74	0.220552	0.090968	2.4245	0.0153295	0.0752225
LPAR2	3269.35	-0.320466	0.106652	-3.00478	0.00265776	0.033792			LPAR2	3323.75	-0.182404	0.097533	-1.87018	0.061459	0.188208			FAM3C2	615.989	0.511883	0.148976	3.436	0.000590378	0.00986995			FAM3C2	554.421	0.331893	0.14249	2.32924	0.0198463	0.0915243
LRFN5	1724.62	0.326338	0.0868957	3.75552	0.000172985	0.00349474			LRFN5	1669.1	0.207091	0.0884972	2.34008	0.0192796	0.0771575			FAN1	2083.81	-0.255071	0.0757094	-3.36908	0.000754197	0.0121043			FAN1	1990.84	-0.155094	0.0877041	-1.76837	0.0769985	0.24355
LYRM2	1802.55	-0.291432	0.10068	-2.89463	0.00379606	0.0451056			LYRM2	1817.97	-0.190172	0.0951156	-1.99938	0.0455676	0.150544			FANCE	648.896	0.334571	0.116951	2.86078	0.00422595	0.0490648			FANCE	617.914	0.294254	0.121491	2.42201	0.0154348	0.0754496
MAB21L1	4643.2	0.323512	0.0687741	4.70398	2.55142e-06	8.10674e-05			MAB21L1	4238	0.106899	0.075095	1.42351	0.154588	0.361434			FAR2P2	4062.84	-0.378307	0.10667	-3.5465	0.000390379	0.00702138			FAR2P2	4322.56	-0.0545364	0.0778152	-0.700845	0.483399	0.733593
MAN2A1	5604.82	0.307961	0.100447	3.06591	0.00217011	0.0289566			MAN2A1	4958.73	-0.00857039	0.0800885	-0.107011	0.91478	0.965378			FAT2	222.343	0.660805	0.178615	3.69961	0.000215931	0.00420688			FAT2	187.564	0.390067	0.18472	2.11167	0.0347148	0.138813
MAP6D1	250.249	-0.673437	0.182469	-3.6907	0.00022364	0.00431113			MAP6D1	283.405	-0.030879	0.198326	-0.155698	0.876271	0.948981			FAT4	320.974	0.616525	0.18938	3.25549	0.00113196	0.0167782			FAT4	291.741	0.420674	0.173976	2.41799	0.0156063	0.0761311
MAPKAPK3	439.038	0.532026	0.142851	3.72433	0.000195832	0.00387464			MAPKAPK3	398.168	0.226049	0.150391	1.50308	0.132819	0.326011			FBLN1	703.36	0.326147	0.102319	3.18755	0.00143483	0.0204757			FBLN1	648.144	0.18065	0.108575	1.66383	0.096147	0.283009
MFAP3L	725.24	0.432558	0.142389	3.03785	0.00238272	0.0309789			MFAP3L	734.15	0.381818	0.155112	2.46157	0.0138331	0.0592632			FDPS	8992.29	-0.191667	0.0668425	-2.86744	0.00413801	0.0482712			FDPS	8828.6	-0.146777	0.0682192	-2.15155	0.0314332	0.12884
MFN1	3292.87	0.276404	0.0900635	3.06899	0.00214781	0.0286813			MFN1	3064.45	0.0138305	0.0783839	0.176446	0.859944	0.941387			FGFR1	2223.6	0.465607	0.154252	3.01847	0.00254053	0.0325735			FGFR1	1968.87	0.214907	0.0830191	2.58864	0.00963556	0.0525906
MID2	1179.07	0.396642	0.105608	3.75581	0.000172781	0.00349471			MID2	879.12	-0.387614	0.114519	-3.3847	0.000712557	0.00495604			FO681492.1	145.552	-1.02968	0.342013	-3.01064	0.002607	0.0332682			FO681492.1	155.609	-0.370947	0.230547	-1.60898	0.10762	0.305892
MMACHC	262.39	0.482084	0.163365	2.95096	0.00316787	0.0391794			MMACHC	248.846	0.358276	0.171652	2.08722	0.0368685	0.127947			FOXI3	37.2004	1.63106	0.536062	3.04267	0.0023449	0.0306489			FOXI3	25.4626	0.921049	0.488528	1.88535	0.059382	0.203414
MORF4L2	19449.2	0.398492	0.0877997	4.53865	5.66158e-06	0.000163343			MORF4L2	16099.5	-0.122504	0.0861845	-1.42142	0.155195	0.362327			FREM1	87.491	0.986655	0.326769	3.01943	0.00253252	0.0325101			FREM1	53.6937	-0.00210255	0.392309	-0.00535941	0.995724	0.998246
MPP3	3280.77	-0.215783	0.0735291	-2.93466	0.00333918	0.0408298			MPP3	3283.03	-0.157806	0.0800939	-1.97026	0.0488083	0.158526			FUT9	722.063	0.692779	0.191001	3.6271	0.000286623	0.00536346			FUT9	623.457	0.432712	0.173038	2.50067	0.0123959	0.0636643
MSL3	2585.2	0.717559	0.107075	6.70147	2.06339e-11	1.41831e-09			MSL3	1867.51	0.00656936	0.121573	0.0540366	0.956906	0.983031			FZD1	190.451	1.09466	0.373426	2.93138	0.00337456	0.0411749			FZD1	129.706	0.272188	0.306596	0.887775	0.374662	0.640768
MT-CO3	152912	-0.315153	0.0734388	-4.29136	1.77579e-05	0.000463008			MT-CO3	158229	-0.177635	0.0779286	-2.27946	0.0226398	0.0874532			GAL	1172.1	-0.347961	0.0872947	-3.98605	6.7183e-05	0.00150151			GAL	1676.01	0.715185	0.0962319	7.4319	1.07051e-13	5.4593e-12
MTHFD1L	1782.63	-0.317523	0.106252	-2.98841	0.00280436	0.0352137			MTHFD1L	1882.39	-0.197814	0.103007	-1.92039	0.0548088	0.172934			GNAI1	4961.97	0.281072	0.0766592	3.66651	0.000245882	0.00466176			GNAI1	4659.54	0.171511	0.0759865	2.25712	0.0240006	0.105769
MTMR6	5674.38	0.1862	0.0572703	3.25125	0.00114897	0.0169284			MTMR6	5329.77	0.0474292	0.0539169	0.879672	0.379037	0.627883			GOLGA6L9	1118.45	0.617937	0.172416	3.584	0.000338378	0.00619749			GOLGA6L9	1037.65	0.386116	0.153915	2.50862	0.0121203	0.0626689
MYO5B	400.774	0.517077	0.153195	3.37529	0.000737376	0.0119008			MYO5B	330.165	0.153567	0.143173	1.0726	0.283453	0.531305			GRIK3	1311.42	0.557974	0.155071	3.59818	0.000320456	0.00592034			GRIK3	999.697	-0.083784	0.136071	-0.615739	0.538067	0.775058
MYOM2	175.158	-0.677895	0.207871	-3.26113	0.00110969	0.0165189			MYOM2	189.704	-0.415346	0.208089	-1.996	0.045934	0.151415			GSG1L	147.005	0.874946	0.300548	2.91117	0.00360076	0.0432336			GSG1L	108.603	-0.102605	0.287149	-0.357324	0.720849	0.881639
NBPF26	426.847	0.537413	0.15921	3.37549	0.000736833	0.0119008			NBPF26	392.284	0.274461	0.161641	1.69797	0.0895141	0.246813			HEPH	119.446	2.2274	0.440045	5.06175	4.15422e-07	1.5282e-05			HEPH	52.8051	0.487	0.358803	1.35729	0.174688	0.414642
NECAB2	2598.07	-0.26277	0.0796271	-3.3	0.000966845	0.0148539			NECAB2	2922.82	0.103567	0.079607	1.30098	0.193267	0.4176			HHIPL2	6.36572	3.22343	1.04412	3.08722	0.0020204	0.0272541			HHIPL2	2.91533	1.28055	1.52425	0.840113	0.400845	NA
NEIL1	618.559	0.41775	0.118809	3.51615	0.000437851	0.00770842			NEIL1	594.194	0.319009	0.130785	2.43919	0.0147203	0.0621604			HKR1	1798.44	-0.248996	0.0802982	-3.10089	0.0019294	0.0262316			HKR1	1774.3	-0.225558	0.0952531	-2.36799	0.0178852	0.0844444
NFATC4	98.8672	0.945999	0.288936	3.27408	0.00106008	0.0159039			NFATC4	101.238	0.514104	0.276096	1.86205	0.062596	0.190897			HOOK1	976.412	0.446758	0.134173	3.32972	0.000869334	0.0135857			HOOK1	925.566	0.281733	0.136656	2.06161	0.0392445	0.151872
NOL9	1098.42	0.323299	0.0916013	3.52941	0.000416482	0.00740779			NOL9	1078.19	0.224184	0.115627	1.93886	0.0525183	0.167681			HPX	154.931	0.702395	0.222077	3.16284	0.00156237	0.0219867			HPX	128.236	0.232757	0.226316	1.02846	0.303733	0.572374
NRXN3	3174.82	0.266394	0.0716441	3.71829	0.000200572	0.00395031			NRXN3	3113.07	0.219495	0.0925528	2.37157	0.0177128	0.0723776			HSD11B2	105.923	-1.2549	0.254364	-4.93349	8.0772e-07	2.80959e-05			HSD11B2	109.122	-0.674375	0.270196	-2.49588	0.0125646	0.0643123
NXPH2	516.435	0.790843	0.140373	5.63385	1.76225e-08	8.39894e-07			NXPH2	408.121	0.246665	0.214068	1.15228	0.249208	0.49199			HSPA1A	1958.22	-2.80338	0.146809	-19.0955	2.75251e-81	3.653e-78			HSPA1A	3274.79	-0.0342589	0.118503	-0.289098	0.772506	0.904887
OLFM1	15783.4	-0.227699	0.0658077	-3.46007	0.000540034	0.00914348			OLFM1	16016.7	-0.16505	0.0762583	-2.16435	0.0304377	0.110396			HSPA1L	181.894	-1.73318	0.211243	-8.20465	2.31266e-16	2.38925e-14			HSPA1L	267.215	-0.0375474	0.159936	-0.234765	0.814391	0.925191
PAPSS2	65.4491	-1.30863	0.399833	-3.27295	0.00106432	0.0159537			PAPSS2	65.9383	-0.893869	0.4029	-2.21858	0.026515	0.0990114			HSPA4L	2592.99	-0.275416	0.0796232	-3.459	0.00054219	0.00917098			HSPA4L	2741.83	-0.0708902	0.0792056	-0.895015	0.370779	0.637918
PCDHA11	1205.76	-0.590094	0.157696	-3.74196	0.000182591	0.00366308			PCDHA11	1295.52	-0.0767312	0.280093	-0.273949	0.784124	0.902991			HSPB1	532.611	-0.497068	0.136323	-3.64625	0.0002661	0.005023			HSPB1	654.893	0.233875	0.138885	1.68395	0.0921922	0.274923
PCDHA2	813.4	0.682286	0.209281	3.26014	0.00111356	0.0165623			PCDHA2	472.1	-0.932114	0.201947	-4.61564	3.92e-06	4.63e-05			HSPE1-MOB4	230.515	0.550195	0.190038	2.89517	0.00378947	0.0451056			HSPE1-MOB4	190.586	0.149602	0.236994	0.631245	0.52788	0.768841
PCK2	352.601	-0.539627	0.163699	-3.29647	0.000979091	0.0150153			PCK2	393.068	-0.108436	0.153392	-0.706919	0.479617	0.713841			HYDIN2	80.867	1.07937	0.327673	3.29405	0.000987542	0.0150779			HYDIN2	65.3106	0.818019	0.338996	2.41307	0.0158189	0.0769198
PDZD7	2271.33	0.393248	0.0806001	4.879	1.06626e-06	3.57208e-05			PDZD7	2010.42	0.15565	0.0717163	2.17036	0.0299796	0.109003			IER3	111.494	-0.894769	0.259167	-3.45248	0.000555459	0.00937703			IER3	116.209	-0.610964	0.258513	-2.36338	0.0181093	0.0851917
PDZD8	3578.82	-0.196684	0.0671901	-2.92728	0.00341942	0.0416339			PDZD8	3512.07	-0.171397	0.083459	-2.05366	0.0400083	0.13646			IFI6	99.3059	-0.781434	0.25655	-3.04594	0.00231957	0.0305492			IFI6	128.477	0.165102	0.238406	0.692524	0.488608	0.737542
PGF	275.759	0.748223	0.157238	4.75853	1.9501e-06	6.26538e-05			PGF	232.372	0.353494	0.17641	2.00382	0.0450898	0.149468			IFT27	1688.78	0.2303	0.0795535	2.89491	0.00379267	0.0451056			IFT27	1604.61	0.137784	0.0808614	1.70395	0.0883901	0.266947
PHF6	4640.01	0.782404	0.0800142	9.77832	1.39504e-22	2.16835e-20			PHF6	3425.39	0.0691022	0.0674134	1.02505	0.305339	0.554727			IGHMBP2	1421.45	0.323662	0.0872981	3.70755	0.000209271	0.00410291			IGHMBP2	1352.71	0.169033	0.0934372	1.80906	0.0704419	0.229897
PIGW	527.843	0.59444	0.117063	5.07794	3.81549e-07	1.41567e-05			PIGW	486.698	0.315045	0.143927	2.18892	0.0286026	0.104967			IL1RAPL1	97.8395	0.857931	0.29214	2.93671	0.00331714	0.0406467			IL1RAPL1	80.582	0.542543	0.291163	1.86336	0.0624114	0.210713
PIWIL2	26.4845	1.54947	0.50734	3.05412	0.00225724	0.0298652			PIWIL2	18.8687	0.702329	0.568232	1.23599	0.216463	0.450052			IMPDH1	4730.39	-0.211657	0.069151	-3.06079	0.00220752	0.0293423			IMPDH1P10	44.9914	0.784505	0.401802	1.95247	0.0508829	0.18243
PLCG2	255.771	1.80033	0.567937	3.16994	0.00152469	0.0215266			PLCG2	131.337	0.626615	0.29805	2.10238	0.0355196	0.124315			INSIG1	5604.7	-0.201133	0.0660471	-3.0453	0.00232447	0.0305671			INSIG1	5745.64	-0.00453976	0.0660509	-0.0687312	0.945204	0.981022
PLCXD1	2932.32	0.491235	0.136393	3.6016	0.00031626	0.00586083			PLCXD1	2668.43	0.120196	0.135821	0.884957	0.37618	0.624932			INTS4P1	49.1671	1.43779	0.38547	3.72996	0.000191508	0.00380217			INTS4P1	36.9878	0.828044	0.421087	1.96645	0.0492472	0.178157
PLEKHG3	209.241	-0.739991	0.17775	-4.16309	3.13969e-05	0.000776362			PLEKHG3	240.237	-0.276347	0.173868	-1.5894	0.11197	0.290521			IPCEF1	282.142	0.839747	0.167672	5.00827	5.49225e-07	1.98238e-05			IPCEF1	244.023	0.37437	0.203945	1.83564	0.0664109	0.220376
PLXNC1	2473.98	-0.34408	0.0978084	-3.5179	0.000434972	0.00767338			PLXNC1	2638.19	-0.153392	0.091199	-1.68195	0.0925792	0.253211			IPMK	1035.55	0.34026	0.104757	3.24811	0.00116175	0.0171022			IPMK	953.308	0.209488	0.114193	1.8345	0.0665791	0.220621
PNRC2	2413.03	0.291219	0.0770715	3.77855	0.000157744	0.00320886			PNRC2	2320.98	0.166056	0.0729457	2.27644	0.0228199	0.0880004			IPO4	1345.43	-0.442077	0.112923	-3.91484	9.04638e-05	0.00195097			IPO4	1381.82	-0.276401	0.120476	-2.29424	0.0217768	0.0983266
POU4F2	1126.85	-0.684968	0.112528	-6.08707	1.14995e-09	6.29843e-08			POU4F2	1283.78	-0.207586	0.103011	-2.01519	0.0438849	0.146573			IQSEC2	1267.83	-0.489123	0.107478	-4.55091	5.34146e-06	0.000154624			IQSEC2	1287.92	-0.225574	0.103533	-2.17877	0.029349	0.122842
PPAT	1830.01	0.259143	0.087139	2.9739	0.0029404	0.0367081			PPAT	1763.88	0.194616	0.0858785	2.26618	0.0234407	0.0899627			IRAK1BP1	480.748	-0.451044	0.15079	-2.99122	0.00277868	0.0349421			IRAK1BP1	478.181	-0.340181	0.154237	-2.20557	0.0274141	0.116742
PRICKLE1	733.076	0.446075	0.121433	3.67342	0.000239322	0.0045675			PRICKLE1	647.824	0.185888	0.130958	1.41944	0.15577	0.363075			IRS4	40.5953	1.82653	0.545398	3.34898	0.000811101	0.0128149			IRS4	21.9685	0.611831	0.62475	0.979321	0.327421	0.596665
PRIMA1	62.7043	-0.966994	0.321696	-3.00592	0.00264775	0.0337134			PRIMA1	75.5959	-0.209622	0.26474	-0.791806	0.428474	0.672127			IRX1	923.44	0.629702	0.121902	5.16565	2.39609e-07	9.24827e-06			IRX1	744.884	0.168337	0.135906	1.23863	0.215482	0.469755
PRKAR1B	2478.47	-0.738932	0.076268	-9.68863	3.37021e-22	5.17982e-20			PRKAR1B	3279.17	0.138586	0.0931285	1.48812	0.13672	0.332157			ITPRIP	210.741	0.99713	0.172056	5.79537	6.81713e-09	3.3993e-07			ITPRIP	155.864	0.35844	0.218569	1.63994	0.101018	0.293092
PTCH2	599.025	0.642636	0.179672	3.57672	0.000347932	0.00635898			PTCH2	536.963	0.0959987	0.13548	0.708585	0.478582	0.713244			KCNH3	276.572	-0.766064	0.153055	-5.00516	5.5817e-07	2.01046e-05			KCNH3	284.13	-0.428769	0.179509	-2.38857	0.016914	0.0811763
PYROXD2	33.378	-1.33343	0.461387	-2.89005	0.00385186	0.0457372			PYROXD2	29.4427	-0.320153	0.472448	-0.677648	0.497995	0.729547			KCNS3	80.8731	1.12667	0.359062	3.13781	0.00170216	0.0236073			KCNS3	54.9816	0.253127	0.342971	0.738041	0.460489	0.715614
RAB11FIP4	7847.72	-0.180903	0.0603265	-2.99873	0.00271105	0.0343419			RAB11FIP4	8043.12	-0.0949289	0.064947	-1.46164	0.14384	0.344433			KIAA0319	1129.97	-0.375746	0.092286	-4.07154	4.67032e-05	0.00110228			KIAA0319	1180.58	-0.131026	0.0900955	-1.45431	0.145861	0.368757
RAB33A	2023.8	0.554759	0.0905262	6.12816	8.89012e-10	4.94778e-08			RAB33A	1500.68	-0.235466	0.0881772	-2.67037	0.00757681	0.0363428			KIAA1549L	4525.67	0.319985	0.0841991	3.80034	0.000144499	0.00298211			KIAA1549L	4162.81	0.184887	0.09697	1.90664	0.0565669	0.19629
RALGPS1	5059.65	-0.18422	0.0604423	-3.04786	0.00230478	0.0304241			RALGPS1	5155.78	0.0449355	0.0608441	0.738535	0.46019	0.697921			KIF21B	27146.1	0.190834	0.0602803	3.16577	0.00154671	0.0217839			KIF21B	24690	0.00641756	0.0656291	0.0977852	0.922103	0.971173
RARA	871.56	-0.37857	0.109704	-3.45083	0.000558859	0.00942522			RARA	871.808	-0.214318	0.121557	-1.7631	0.0778833	0.223671			KIT	217.022	0.866391	0.263333	3.2901	0.00100152	0.0152509			KIT	157.332	0.21938	0.234918	0.933855	0.350379	0.618435
RBFOX1	3645.42	-0.461707	0.118639	-3.89171	9.9541e-05	0.00212811			RBFOX1	4757.81	0.376832	0.107864	3.49357	0.000476605	0.00351932			KLHL25	673.298	0.395356	0.121142	3.26358	0.00110015	0.0164053			KLHL25	604.008	0.155263	0.126554	1.22686	0.219877	0.47528
RGS4	9705.75	-0.298175	0.09406	-3.17006	0.0015241	0.0215266			RGS4	9173.38	-0.508342	0.217871	-2.33322	0.0196366	0.0782676			KLHL5	860.07	0.453798	0.141114	3.21582	0.00130073	0.0188268			KLHL5	756.88	0.217458	0.11955	1.81897	0.0689157	0.226261
RHPN2	321.51	0.705718	0.174063	4.05437	5.02693e-05	0.00117044			RHPN2	289.951	0.258521	0.192841	1.34059	0.180054	0.39948			KRT222	953.203	0.319523	0.106429	3.00221	0.0026803	0.0340274			KRT222	929.793	0.267163	0.10909	2.44902	0.0143244	0.0712879
RNA5SP202	67.0863	5.18578	1.5994	3.24233	0.00118558	0.0174228			RNA5SP202	3.24469	-0.347761	1.41467	-0.245825	0.805817	NA			LAMA2	139.693	-0.952344	0.312574	-3.04678	0.00231307	0.030487			LAMA2	135.468	-0.738421	0.311843	-2.36792	0.0178882	0.0844444
RNF215	1017.32	0.302248	0.0933639	3.23732	0.0012066	0.0176569			RNF215	980.612	0.119028	0.0920894	1.29253	0.196175	0.421395			LDHA	7864.25	-0.501784	0.0947666	-5.29494	1.19053e-07	4.89052e-06			LDHA	8961.68	0.0633424	0.0960754	0.659299	0.509704	0.754911
RPL23AP47	14.769	6.39652	1.34985	4.73868	2.15114e-06	6.88565e-05			RPL23AP47	4.46854	4.64264	3.9178	1.18501	0.236012	NA			LGALS3BP	3729.29	-0.205628	0.0623845	-3.29614	0.000980239	0.0150196			LGALS3BP	3782.1	-0.060683	0.0724662	-0.837398	0.402369	0.665942
RTKN	357.785	0.576884	0.156916	3.67638	0.000236564	0.00452488			RTKN	323.082	0.284187	0.164543	1.72713	0.0841441	0.236055			LINC02495	307.519	-0.461928	0.155606	-2.96857	0.00299192	0.0372435			LINC02495	369.916	0.207831	0.14264	1.45703	0.145108	0.367522
RTTN	440.264	0.395767	0.130381	3.03547	0.00240161	0.031118			RTTN	430.533	0.315216	0.132392	2.38093	0.0172692	0.070975			LIPA	1380.96	-0.386844	0.087988	-4.39655	1.09985e-05	0.000303127			LIPA	1471.35	-0.0887084	0.0826842	-1.07286	0.283335	0.551187
S100A13	922.428	0.511688	0.129721	3.94453	7.99556e-05	0.00174617			S100A13	729.919	-0.106304	0.137276	-0.774388	0.438701	0.681139			LPAR2	3269.35	-0.320466	0.106652	-3.00478	0.00265776	0.033792			LPAR2	3166.32	-0.305275	0.121652	-2.50942	0.0120931	0.0625734
SCD	47561.8	-0.208338	0.0566375	-3.67844	0.000234667	0.00449357			SCD	48434.1	-0.120812	0.0699755	-1.72649	0.0842599	0.236245			LPIN3	227.534	-0.958206	0.225397	-4.25119	2.12638e-05	0.000542699			LPIN3	243.939	-0.309298	0.20414	-1.51513	0.129741	0.343276
SCML1	856.43	0.817205	0.121369	6.73321	1.65963e-11	1.16872e-09			SCML1	611.639	-0.0401061	0.114931	-0.348958	0.727121	0.873182			LRRC37A6P	81.1022	1.4112	0.403421	3.49807	0.00046863	0.00814036			LRRC37A6P	56.0945	0.367804	0.350082	1.05062	0.293433	0.561501
SERPINB6	735.882	-0.365524	0.125563	-2.91109	0.00360176	0.0432336			SERPINB6	729.148	-0.271871	0.122839	-2.21323	0.026882	0.100002			LRRTM2	1423.09	-0.719687	0.140879	-5.10856	3.24628e-07	1.22556e-05			LRRTM2	1615.33	-0.137632	0.105623	-1.30305	0.192557	0.440097
SH3D21	378.489	-0.565364	0.181595	-3.11333	0.0018499	0.0252902			SH3D21	392.525	-0.368289	0.151783	-2.42642	0.0152486	0.0639791			LUZP2	366.681	0.707201	0.210063	3.3666	0.000760996	0.0121996			LUZP2	314.771	0.483944	0.190039	2.54655	0.0108792	0.0578405
SHMT2	3179.24	-0.494635	0.106982	-4.62353	3.77255e-06	0.000113544			SHMT2	3473.61	-0.170878	0.0821008	-2.08133	0.037404	0.129426			LYRM2	1802.55	-0.291432	0.10068	-2.89463	0.00379606	0.0451056			LYRM2	1749.65	-0.217852	0.096915	-2.24787	0.0245847	0.107568
SIRPB2	17.1983	2.05507	0.712055	2.88612	0.00390025	0.0460582			SIRPB2	9.95211	0.568956	0.741732	0.767064	0.443043	0.68449			MAGEE2	6.42813	-5.05752	1.50001	-3.37164	0.000747209	0.0120257			MAGEE2	6.03455	-5.92195	1.5436	-3.83645	0.000124827	NA
SLC16A3	112.803	-1.06832	0.258286	-4.13619	3.53113e-05	0.000860399			SLC16A3	159.153	-0.00443008	0.270209	-0.0163951	0.986919	0.995331			MAGI2	1597.03	0.70409	0.174237	4.04099	5.32263e-05	0.00123264			MAGI2	1483.63	0.479005	0.296907	1.61332	0.106676	0.304147
SLC17A7	3797.86	0.236568	0.075242	3.14409	0.00166602	0.0231688			SLC17A7	3644.23	0.148632	0.0646103	2.30045	0.021423	0.0837828			MAN2A1	5604.82	0.307961	0.100447	3.06591	0.00217011	0.0289566			MAN2A1	4890.48	-0.0298153	0.0843338	-0.353539	0.723684	0.882958
SLC25A51	623.956	0.37842	0.128497	2.94498	0.00322977	0.0398023			SLC25A51	575.13	0.173464	0.129012	1.34455	0.17877	0.39753			MAOA	670.619	-0.371875	0.109479	-3.39678	0.000681846	0.0111506			MAOA	853.577	0.504703	0.116997	4.31381	1.60468e-05	0.000245679
SLC30A10	836.559	-0.293806	0.0980603	-2.99618	0.00273384	0.0345293			SLC30A10	873.155	-0.118921	0.0872399	-1.36315	0.172836	0.388689			MAP1B	249514	0.329028	0.0625938	5.25655	1.46782e-07	5.90308e-06			MAP1B	227995	0.177172	0.0799174	2.21694	0.0266273	0.114289
SLC6A1	137.103	-0.706717	0.232709	-3.03692	0.00239009	0.031028			SLC6A1	160.247	-0.283018	0.274265	-1.03191	0.302113	0.55138			MAP4K3	2689.41	0.271519	0.0873956	3.10678	0.00189138	0.0258164			MAP4K3	2588.8	0.237873	0.0916988	2.59407	0.00948461	0.0519716
SLC6A9	707.382	-0.386597	0.130429	-2.96404	0.00303632	0.0377418			SLC6A9	820.724	0.100134	0.0974692	1.02734	0.304261	0.553756			MAP6D1	250.249	-0.673437	0.182469	-3.6907	0.00022364	0.00431113			MAP6D1	284.291	-0.164679	0.176652	-0.932225	0.35122	0.618899
SMIM11B	246.779	0.97507	0.227369	4.2885	1.79884e-05	0.000468106			SMIM11B	258.304	1.16377	0.834579	1.39444	0.163184	0.374355			MAPKAPK3	439.038	0.532026	0.142851	3.72433	0.000195832	0.00387464			MAPKAPK3	394.238	0.356551	0.158451	2.25023	0.0244342	0.10721
SMN1	884.329	0.588919	0.19351	3.04335	0.00233957	0.0306298			SMN1	645.772	-0.127454	0.165567	-0.769804	0.441416	0.683178			MEIS1	1371.34	-0.489037	0.118574	-4.12432	3.7184e-05	0.000902299			MEIS1	1426.98	-0.113327	0.112766	-1.00498	0.314908	0.583521
SPART	531.454	-0.572721	0.154465	-3.70778	0.000209085	0.00410291			SPART	509.859	-0.26063	0.13621	-1.91344	0.0556923	0.175034			MID2	1179.07	0.396642	0.105608	3.75581	0.000172781	0.00349471			MID2	942.495	-0.116846	0.111945	-1.04378	0.296586	0.564805
SPHKAP	1320.58	-0.5037	0.12754	-3.94936	7.83603e-05	0.00171785			SPHKAP	1501.38	-0.0624204	0.128946	-0.48408	0.628329	0.818545			MIOS	2199.92	-0.249595	0.087335	-2.8579	0.00426451	0.0494127			MIOS	2089.99	-0.201124	0.0917065	-2.19313	0.0282981	0.119435
SSC4D	89.1317	0.871361	0.265475	3.28227	0.00102975	0.0155435			SSC4D	71.4455	0.646074	0.281704	2.29345	0.0218223	0.0849499			MMACHC	262.39	0.482084	0.163365	2.95096	0.00316787	0.0391794			MMACHC	251.971	0.356296	0.182535	1.95193	0.0509461	0.182578
STC2	240.252	-1.82871	0.305401	-5.98792	2.12548e-09	1.11124e-07			STC2	420.817	0.691582	0.230305	3.0029	0.00267422	0.0153054			MORF4L2	19449.2	0.398492	0.0877997	4.53865	5.66158e-06	0.000163343			MORF4L2	15053.3	-0.212296	0.0881576	-2.40815	0.0160337	0.0777826
SV2C	7970.05	0.285326	0.0824302	3.46142	0.000537325	0.00910655			SV2C	7708.66	0.229185	0.0990678	2.31342	0.0206996	0.0816761			MPP3	3280.77	-0.215783	0.0735291	-2.93466	0.00333918	0.0408298			MPP3	3201.63	-0.0547225	0.0722554	-0.757349	0.448841	0.706359
SVIL-AS1	401.318	1.25331	0.258757	4.84358	1.27521e-06	4.20674e-05			SVIL-AS1	82.2917	-5.1746	1.04793	-4.9379	7.9e-07	1.07e-05			MSL3	2585.2	0.717559	0.107075	6.70147	2.06339e-11	1.41831e-09			MSL3	1883.75	0.0365821	0.110632	0.330665	0.740898	0.890566
TAPBPL	45.1395	1.30965	0.423823	3.09008	0.00200103	0.027035			TAPBPL	41.0047	0.979753	0.429384	2.28176	0.0225032	0.0870641			MT1X	45.6414	-1.16718	0.396245	-2.94559	0.00322336	0.0397517			MT1X	43.4053	-0.966546	0.438716	-2.20313	0.0275858	0.117179
TBL1XR1	3336.66	-0.481244	0.121003	-3.97712	6.97541e-05	0.00154291			TBL1XR1	3643.44	0.101569	0.220398	0.460845	0.64491	0.828568			MT-CO1	565054	-0.297483	0.0797441	-3.73047	0.000191126	0.00379897			MT-CO1	567039	-0.18107	0.0840492	-2.15433	0.0312142	0.128418
TCEAL2	3229.83	0.390499	0.0865306	4.51284	6.39643e-06	0.000182592			TCEAL2	2643.23	-0.13479	0.0793338	-1.69902	0.0893153	0.246495			MT-CO3	152912	-0.315153	0.0734388	-4.29136	1.77579e-05	0.000463008			MT-CO3	154986	-0.166365	0.0815362	-2.04038	0.0413128	0.157565
TFAP2A	161.993	-1.75115	0.401337	-4.36329	1.28123e-05	0.000347018			TFAP2A	218.315	-0.715292	0.610195	-1.17223	0.241103	0.482578			MT-ND3	28922.7	-0.31307	0.0602564	-5.19564	2.04019e-07	8.0181e-06			MT-ND3	29511.4	-0.140765	0.060121	-2.34136	0.0192134	0.0891247
TFAP2B	61.3788	-5.04001	0.604596	-8.33617	7.6736e-17	8.12225e-15			TFAP2B	64.8464	-2.34866	1.11353	-2.1092	0.0349274	0.12268			MVD	8882.54	-0.221972	0.0739987	-2.99968	0.00270264	0.0342605			MVD	8687.63	-0.199199	0.0930558	-2.14064	0.0323028	0.131433
TIMP2	11314.5	-0.202536	0.0534175	-3.79156	0.000149703	0.00307846			TIMP2	11579.2	-0.0954645	0.0466007	-2.04856	0.0405049	0.137729			MYC	3013.23	-0.451535	0.0858104	-5.26201	1.42492e-07	5.74395e-06			MYC	3268.13	-0.145136	0.103136	-1.40722	0.159361	0.391052
TLX2	78.3176	1.25773	0.377135	3.33497	0.000853092	0.0134047			TLX2	45.732	-0.0111995	0.428704	-0.0261241	0.979158	0.992328			MYOD1	9.31704	3.7601	1.09141	3.44517	0.000570705	0.00958752			MYOD1	4.5755	2.65978	1.30265	2.04182	0.0411691	NA
TMEM121	208.104	-1.12663	0.24282	-4.63979	3.4877e-06	0.000105753			TMEM121	272.057	0.06949	0.205212	0.338626	0.734892	0.877678			NAGK	5096.12	-0.244166	0.0640199	-3.8139	0.00013679	0.00286064			NAGK	4952.42	-0.135469	0.0680086	-1.99194	0.0463778	0.170658
TMEM187	240.511	0.587763	0.175119	3.35636	0.000789767	0.0125238			TMEM187	231.666	0.370305	0.163726	2.26174	0.0237132	0.0907724			NANS	1507.06	-0.260649	0.0854833	-3.04913	0.00229507	0.0303192			NANS	1502.5	-0.162986	0.0919226	-1.77308	0.0762151	0.242086
TMEM201	2140.85	-0.198526	0.0692803	-2.86555	0.00416291	0.0484961			TMEM201	2160.75	-0.108763	0.0648229	-1.67784	0.0933775	0.254961			NEB	389.548	0.488967	0.167844	2.91323	0.00357716	0.043068			NEB	293.24	0.114845	0.155323	0.739396	0.459666	0.714778
TMEM233	1476.13	0.696972	0.118698	5.87182	4.31024e-09	2.18719e-07			TMEM233	1223.06	0.248866	0.109791	2.26672	0.0234071	0.0898536			NECAB2	2598.07	-0.26277	0.0796271	-3.3	0.000966845	0.0148539			NECAB2	2634.55	-0.088208	0.077021	-1.14525	0.252108	0.517115
TMPRSS3	16.5963	-2.40415	0.640955	-3.75088	0.000176214	0.00354752			TMPRSS3	15.8887	-1.4096	0.599046	-2.35308	0.0186187	0.0750734			NEO1	7408.21	0.322755	0.0897364	3.5967	0.000322275	0.00594039			NEO1	6409.97	0.0190556	0.0797282	0.239007	0.8111	0.924178
TMSB15B	3254.92	0.420949	0.0906828	4.64199	3.45065e-06	0.000104998			TMSB15B	2954.36	0.135178	0.0902849	1.49724	0.13433	0.328534			NEUROD4	50.0184	1.20593	0.368783	3.27002	0.00107539	0.0161057			NEUROD4	28.6149	-0.0637649	0.453032	-0.140751	0.888066	0.955977
TOPBP1	2507.69	-0.276287	0.0781387	-3.53585	0.000406468	0.00725211			TOPBP1	2444.57	-0.144186	0.0671949	-2.14579	0.0318894	0.114417			NHLH2	6432.42	0.248113	0.0716244	3.46408	0.000532043	0.00903478			NHLH2	5741.8	0.0374297	0.0711012	0.526429	0.59859	0.813435
TP53TG3	16.2273	5.1744	1.08443	4.77152	1.82842e-06	5.8854e-05			TP53TG3	0.591651	-2.534	3.19328	-0.793544	0.427461	NA			NHLRC1	20.5311	-1.69369	0.56286	-3.00908	0.00262038	0.0333896			NHLRC1	23.9794	-0.782516	0.509095	-1.53707	0.124276	0.335316
TP53TG3B	18.5637	2.18562	0.730954	2.99009	0.00278895	0.0350457			TP53TG3B	3.82437	-5.28537	1.70997	-3.09091	0.00199541	NA			NKAIN4	1074.79	0.64947	0.115337	5.63108	1.7908e-08	8.5115e-07			NKAIN4	856.196	0.130279	0.117893	1.10506	0.269134	0.537137
TP53TG3C	51.4941	2.95854	0.479149	6.17459	6.63361e-10	3.7159e-08			TP53TG3C	5.83895	-5.90394	1.52529	-3.87071	0.000108519	0.000947736			NLGN4X	5821.37	0.198731	0.0599725	3.3137	0.000920692	0.0142592			NLGN4X	5333.12	0.0199573	0.0630436	0.316564	0.751575	0.895411
TP53TG3F	12.981	3.66288	1.03355	3.54397	0.000394152	0.00706892			TP53TG3F	0.971924	-3.32664	3.56372	-0.933474	0.350575	NA			NOC4L	713.934	-0.41069	0.106466	-3.85749	0.000114556	0.00242507			NOC4L	741.01	-0.232006	0.110824	-2.09347	0.0363076	0.143449
TPBG	193.745	-1.43823	0.260175	-5.52794	3.24022e-08	1.48285e-06			TPBG	259.66	-0.215995	0.231168	-0.934364	0.350116	0.599864			NOL9	1098.42	0.323299	0.0916013	3.52941	0.000416482	0.00740779			NOL9	1026.56	0.248384	0.0961302	2.58383	0.00977095	0.053103
TPSB2	9.5893	3.53113	0.995369	3.54755	0.000388827	0.00701148			TPSB2	4.87164	2.43077	1.18064	2.05886	0.0395079	0.135118			NOTCH1	88.6269	1.58789	0.406148	3.90963	9.24384e-05	0.00199106			NOTCH1	59.5663	0.47695	0.34588	1.37895	0.167911	0.403705
TTC30B	403.296	-0.418775	0.12756	-3.28297	0.00102719	0.0155322			TTC30B	410.554	-0.329388	0.133663	-2.46431	0.0137277	0.0588973			NOVA1	4257.87	0.420306	0.121682	3.45413	0.000552068	0.00932893			NOVA1	3604.65	-0.0133861	0.0707924	-0.189089	0.850023	0.941607
U2AF1	479.719	-0.716511	0.233977	-3.06232	0.00219629	0.0292156			U2AF1	543.155	-0.072774	0.541303	-0.134442	0.893053	0.955092			NPC1	1614.12	-0.239461	0.0836198	-2.86369	0.00418736	0.0487151			NPC1	1572.18	-0.128564	0.0880201	-1.46062	0.144121	0.365747
UBALD2	761.662	-0.485499	0.121643	-3.99117	6.57478e-05	0.00147894			UBALD2	777.905	-0.161769	0.118986	-1.35956	0.17397	0.390192			NR6A1	3269.5	0.507908	0.0688921	7.37251	1.67449e-13	1.41617e-11			NR6A1	2428.8	-0.259941	0.0857601	-3.03102	0.00243728	0.0177874
VAT1L	25489.8	-0.188003	0.0627679	-2.99521	0.00274258	0.0345889			VAT1L	26723.8	-0.0156024	0.0563271	-0.276996	0.781783	0.901528			NT5E	65.6492	1.18872	0.415939	2.85792	0.00426428	0.0494127			NT5E	58.8784	1.01063	0.450878	2.24147	0.0249958	0.108699
VAX2	212.279	1.08109	0.24565	4.40092	1.0779e-05	0.000298936			VAX2	139.458	0.119266	0.215271	0.554028	0.57956	0.787697			NXN	1713.59	-0.410003	0.0897968	-4.5659	4.97357e-06	0.000145193			NXN	1767.76	-0.0712918	0.0839022	-0.849701	0.395491	0.659775
ZFHX4	1485.31	-0.411521	0.132723	-3.10061	0.00193125	0.0262361			ZFHX4	1440.23	-0.241407	0.173456	-1.39175	0.163999	0.375593			NXPH2	516.435	0.790843	0.140373	5.63385	1.76225e-08	8.39894e-07			NXPH2	415.561	0.348613	0.165092	2.11163	0.0347179	0.138813
ZIC1	22.0677	-2.63168	0.814631	-3.23052	0.00123566	0.0179906			ZIC1	38.1359	-3.24667	1.29504	-2.50699	0.0121762	0.0534335			ONECUT1	451.127	1.12753	0.203307	5.54591	2.92422e-08	1.3418e-06			ONECUT1	311.736	0.158193	0.166874	0.947976	0.343142	0.611112
ZNF10	1399.73	-0.282528	0.0833287	-3.39052	0.0006976	0.0113867			ZNF10	1399.03	-0.191321	0.0780232	-2.4521	0.0142025	0.0603923			OTULIN	1173.37	0.378612	0.11325	3.34316	0.000828301	0.0130628			OTULIN	1079.91	0.143339	0.110194	1.30079	0.193332	0.441079
ZNF358	3763.9	-0.231588	0.0743757	-3.11376	0.00184718	0.0252731			ZNF358	3769.09	-0.116626	0.0722308	-1.61463	0.106391	0.280156			PALM3	1781.43	-0.336035	0.0942869	-3.56397	0.000365294	0.00665513			PALM3	1983.92	0.106799	0.0914741	1.16753	0.242995	0.505164
ZNF429	778.314	-0.389919	0.119024	-3.27597	0.00105301	0.0158116			ZNF429	823.969	-0.126684	0.115874	-1.09328	0.27427	0.521583			PAPSS2	65.4491	-1.30863	0.399833	-3.27295	0.00106432	0.0159537			PAPSS2	58.0567	-1.08246	0.478626	-2.2616	0.0237222	0.104749
ZNF502	340.343	-0.43558	0.145325	-2.99728	0.00272403	0.0344557			ZNF502	341.239	-0.374265	0.153167	-2.44352	0.0145449	0.0615375			PBX2	5698.88	0.328044	0.07081	4.63273	3.60877e-06	0.00010904			PBX2	5154.03	0.150763	0.0751175	2.00702	0.0447471	0.166135
ZNF584	577.556	-0.33245	0.115165	-2.88672	0.00389277	0.0460329			ZNF584	586.787	-0.238678	0.111672	-2.13731	0.0325729	0.116221			PCDH19	1020.79	1.09749	0.177318	6.18941	6.03899e-10	3.39384e-08			PCDH19	840.927	0.760669	0.366036	2.07813	0.0376975	0.147637
ZNF705E	6.61529	3.71562	1.27324	2.91823	0.0035202	0.0426803			ZNF705E	1.44657	1.12289	1.89836	0.591504	0.554182	NA			PCDHA2	813.4	0.682286	0.209281	3.26014	0.00111356	0.0165623			PCDHA2	737.432	0.526589	0.428637	1.22852	0.219252	0.474247
ZNF85	460.665	0.443122	0.138786	3.19283	0.00140884	0.0201704			ZNF85	435.6	0.286954	0.122197	2.3483	0.0188596	0.075837			PCDHAC1	1462.19	-0.540031	0.100904	-5.35194	8.70157e-08	3.71605e-06			PCDHAC1	1693.18	0.0397438	0.0901215	0.441003	0.659211	0.848993
ZNF876P	94.063	0.751093	0.253144	2.96706	0.00300663	0.0373997			ZNF876P	71.7702	0.13261	0.26932	0.492389	0.622445	0.814919			PCDHB2	2794.06	-0.314372	0.0875195	-3.59203	0.000328113	0.00604155			PCDHB2	2986.96	-0.0752394	0.11064	-0.680039	0.49648	0.743668
ZNF879	367.233	-0.413117	0.143813	-2.8726	0.00407105	0.0477159			ZNF879	356.281	-0.300712	0.152482	-1.97211	0.0485969	0.157985			PCDHGB7	180.692	-2.60938	0.289896	-9.0011	2.23468e-19	2.83492e-17			PCDHGB7	750.575	1.85812	0.142341	13.054	6.02833e-39	1.69866e-36
																		PCP4	162.625	1.02767	0.251336	4.08882	4.33575e-05	0.00103321			PCP4	127.318	0.552159	0.266139	2.0747	0.0380143	0.148476
																		PCYT2	3103.22	-0.272644	0.0814514	-3.34733	0.000815943	0.0128797			PCYT2	3264.88	-0.0247564	0.0777931	-0.318233	0.750308	0.894574
																		PDE4D	2445.17	-0.367867	0.0960933	-3.82822	0.000129071	0.00270909			PDE4D	2504.75	-0.20804	0.0926529	-2.24537	0.0247441	0.1079
																		PDGFC	79.3022	1.89663	0.414316	4.57775	4.70008e-06	0.000139092			PDGFC	44.984	0.718451	0.408223	1.75995	0.0784171	0.246257
																		PDIA3P1	446.616	-0.712918	0.130044	-5.48213	4.20235e-08	1.87346e-06			PDIA3P1	480.782	-0.315316	0.139838	-2.25486	0.0241422	0.106209
																		PDS5B	3351.5	0.203579	0.071311	2.8548	0.00430643	0.0497982			PDS5B	3045.58	-0.0976931	0.0802457	-1.21742	0.223443	0.479964
																		PHF6	4640.01	0.782404	0.0800142	9.77832	1.39504e-22	2.16835e-20			PHF6	2965.33	-0.333488	0.0736906	-4.52552	6.02483e-06	0.000102837
																		PIDD1	537.804	0.633047	0.159698	3.96403	7.36955e-05	0.00162384			PIDD1	454.85	0.299737	0.158521	1.89083	0.0586469	0.201697
																		PIEZO2	19101.5	-0.374527	0.123206	-3.03984	0.00236705	0.0308682			PIEZO2	19466.9	-0.139558	0.0542136	-2.57423	0.0100462	0.0544035
																		PIK3R1	4280.55	0.315238	0.0724856	4.34898	1.36774e-05	0.000367563			PIK3R1	3866.5	0.0781229	0.0729307	1.07119	0.284082	0.551995
																		PIP4K2A	2163.29	0.247417	0.0865945	2.85719	0.00427412	0.0494909			PIP4K2A	2073.38	0.0709914	0.0955623	0.742881	0.457554	0.712984
																		PIP4P1	2261.72	-0.273999	0.0877887	-3.12113	0.00180162	0.0248071			PIP4P1	2222.82	-0.205159	0.078973	-2.59783	0.00938145	0.0515251
																		PIRT	682.944	-0.382123	0.107716	-3.54749	0.000388917	0.00701148			PIRT	739.234	-0.0319264	0.119737	-0.266638	0.789748	0.912903
																		PIWIL2	26.4845	1.54947	0.50734	3.05412	0.00225724	0.0298652			PIWIL2	13.8374	0.12643	0.67025	0.188632	0.850382	0.941639
																		PJA2	31131.8	-0.193834	0.0637958	-3.03835	0.00237876	0.0309742			PJA2	31916.2	-0.00962444	0.0571103	-0.168524	0.866171	0.947437
																		PLCXD1	2932.32	0.491235	0.136393	3.6016	0.00031626	0.00586083			PLCXD1	2808.35	0.277975	0.126925	2.19007	0.0285194	0.120278
																		PLEKHB1	410.21	-0.434763	0.149266	-2.91267	0.00358354	0.0430849			PLEKHB1	437.045	-0.111446	0.130618	-0.853221	0.393537	0.658402
																		PLXNC1	2473.98	-0.34408	0.0978084	-3.5179	0.000434972	0.00767338			PLXNC1	2540.24	-0.205606	0.105836	-1.94269	0.052054	0.185163
																		PNRC2	2413.03	0.291219	0.0770715	3.77855	0.000157744	0.00320886			PNRC2	2086.45	-0.0705983	0.093182	-0.757639	0.448667	0.706286
																		POLE	2121.7	-0.342622	0.114487	-2.99268	0.0027654	0.0348259			POLE4	853.309	0.223804	0.113736	1.96775	0.0490969	0.177829
																		POLN	189.518	-0.582624	0.190163	-3.06381	0.00218536	0.0291004			POLN	190.725	-0.232054	0.21357	-1.08655	0.277237	0.545419
																		POU2F2	1835.04	-0.35902	0.101474	-3.53806	0.000403081	0.00719913			POU2F2	2022.03	0.0530894	0.091106	0.582722	0.560081	0.789607
																		POU3F2	552.799	0.849464	0.228243	3.72175	0.000197849	0.0039037			POU3F2	420.206	0.264714	0.211282	1.25289	0.210244	0.462404
																		PPP1R14B	2104.04	-0.252538	0.0874672	-2.88723	0.00388646	0.0460084			PPP1R14B	2084.57	-0.167905	0.0761324	-2.20543	0.027424	0.116754
																		PPP2R3A	2616.9	0.254532	0.0809394	3.14472	0.00166244	0.0231681			PPP2R3A	2411.64	0.14174	0.091244	1.55342	0.120323	0.328737
																		PRIMA1	62.7043	-0.966994	0.321696	-3.00592	0.00264775	0.0337134			PRIMA1	68.8065	-0.43994	0.312601	-1.40735	0.159323	0.391039
																		PRKAR1B	2478.47	-0.738932	0.076268	-9.68863	3.37021e-22	5.17982e-20			PRKAR1B	3455.42	0.273096	0.0700975	3.89595	9.78152e-05	0.00118096
																		PRODH	28.0907	-1.68051	0.551544	-3.04692	0.00231202	0.030487			PRODH	25.68	-1.10396	0.524243	-2.10583	0.0352195	0.140312
																		PROS1	664.995	-0.387728	0.128404	-3.0196	0.00253105	0.0325101			PROS1	721.434	-0.0893729	0.109501	-0.816181	0.414397	0.675294
																		PRSS53	1018.63	-0.480701	0.11367	-4.22891	2.34822e-05	0.000594917			PRSS53	1030.29	-0.308373	0.152018	-2.02853	0.0425062	0.160606
																		PRSS53	1018.63	-0.480701	0.11367	-4.22891	2.34822e-05	0.000594917			PRUNE2	5748.98	-0.0241915	0.0860532	-0.281123	0.778616	0.908446
																		PRUNE2	5042.59	-0.466129	0.0999911	-4.6617	3.13602e-06	9.70845e-05			PSMC3	3598.61	-0.205342	0.0808325	-2.54034	0.0110746	0.058657
																		PTCH2	599.025	0.642636	0.179672	3.57672	0.000347932	0.00635898			PTCH2	560.806	0.375028	0.165655	2.26391	0.0235794	0.104202
																		PYROXD2	33.378	-1.33343	0.461387	-2.89005	0.00385186	0.0457372			PYROXD2	30.653	-0.441322	0.482887	-0.913924	0.360757	0.628678
																		RAB11FIP2	4300.09	0.272114	0.0894137	3.04331	0.00233989	0.0306298			RAB11FIP2	3939.43	0.0330549	0.079156	0.417592	0.676245	0.858697
																		RAB11FIP4	7847.72	-0.180903	0.0603265	-2.99873	0.00271105	0.0343419			RAB11FIP4	7791.82	-0.162688	0.0645278	-2.52121	0.0116953	0.0610851
																		RAB33A	2023.8	0.554759	0.0905262	6.12816	8.89012e-10	4.94778e-08			RAB33A	1472.96	-0.219206	0.0922199	-2.37699	0.0174545	0.0831225
																		RAB9A	688.058	0.452566	0.153715	2.94419	0.00323799	0.0398466			RAB9A	656.231	0.402924	0.160895	2.50426	0.0122707	0.0632558
																		RAD51C	410.459	-0.919424	0.177586	-5.17735	2.25055e-07	8.74523e-06			RAD51C	473.306	-0.241948	0.145611	-1.66161	0.0965906	0.283764
																		RALGPS1	5059.65	-0.18422	0.0604423	-3.04786	0.00230478	0.0304241			RALGPS1	4965.74	-0.0953178	0.0794053	-1.2004	0.229986	0.488378
																		RAP1GAP	4054.55	-0.307015	0.0907949	-3.38142	0.000721133	0.0117043			RAP1GAP2	3532.76	-0.0953589	0.0759444	-1.25564	0.209246	0.461063
																		RBFOX1	3645.42	-0.461707	0.118639	-3.89171	9.9541e-05	0.00212811			RBFOX1	4323.1	0.156713	0.105462	1.48596	0.137289	0.355316
																		RBMX	11585.9	0.298166	0.0629062	4.73985	2.13875e-06	6.85871e-05			RBMX	10585.7	0.153629	0.0597382	2.5717	0.01012	0.0546428
																		RBMX2	841.108	-0.488882	0.12667	-3.85949	0.000113622	0.00240825			RBMX2	884.242	-0.241066	0.116091	-2.07652	0.0378455	0.148008
																		REM2	191.71	0.63045	0.184131	3.42391	0.000617263	0.0102499			REM2	147.19	0.0465943	0.209414	0.222498	0.823926	0.929608
																		RGMA	2052.36	0.471781	0.146508	3.22016	0.00128117	0.0185749			RGMA	1620.37	-0.151669	0.117579	-1.28994	0.197071	0.446302
																		RGS4	9705.75	-0.298175	0.09406	-3.17006	0.0015241	0.0215266			RGS4	11893	0.264737	0.0743119	3.5625	0.000367334	0.00366342
																		RGS8	2946.46	0.563975	0.130587	4.31877	1.56898e-05	0.000414544			RGS8	2568	0.262155	0.123855	2.11663	0.0342912	0.137604
																		RHBDD1	621.809	-0.393784	0.120586	-3.26558	0.00109241	0.0163183			RHBDD1	580.987	-0.312176	0.120739	-2.58555	0.00972248	0.0529434
																		RHPN2	321.51	0.705718	0.174063	4.05437	5.02693e-05	0.00117044			RHPN2	275.902	0.311361	0.174788	1.78137	0.0748528	0.239175
																		RINL	183.436	-0.827733	0.22399	-3.69539	0.000219546	0.00426077			RINL	203.796	-0.103939	0.20303	-0.511939	0.608694	0.819922
																		RNA5SP283	132.634	-0.930289	0.225996	-4.1164	3.84841e-05	0.000929924			RNA5SP283	144.034	-0.4685	0.212742	-2.2022	0.0276515	0.117332
																		RND2	4098.89	0.261499	0.0796246	3.28415	0.0010229	0.0154943			RND2	3733.86	0.10946	0.0681653	1.6058	0.108319	0.307042
																		ROBO1	7049.3	0.648553	0.13092	4.95379	7.27811e-07	2.55742e-05			ROBO1	5503.74	0.0649556	0.0992225	0.654646	0.512696	0.758122
																		ROBO2	6338.57	0.295537	0.0864583	3.41826	0.00063023	0.0104192			ROBO2	5538.12	-0.00988922	0.0831999	-0.118861	0.905385	0.964352
																		RORA	680.419	1.00385	0.194693	5.15608	2.52178e-07	9.62574e-06			RORA	553.636	0.385882	0.148702	2.59499	0.00945923	0.0518667
																		RPL13	12967.2	-0.2788	0.0814	-3.42507	0.000614652	0.0102164			RPL13	13370.1	-0.0693195	0.0768206	-0.902356	0.366868	0.633875
																		RPL23AP47	14.769	6.39652	1.34985	4.73868	2.15114e-06	6.88565e-05			RPL23AP47	6.27017	5.18247	3.91459	1.32389	0.185541	NA
																		RPL23AP53	129.754	-0.658099	0.215338	-3.05613	0.00224216	0.029734			RPL23AP53	133.268	-0.329788	0.216821	-1.52101	0.128257	0.341327
																		RTL8C	8166.3	-0.189521	0.0624376	-3.03537	0.00240243	0.031118			RTL8C	8293.86	-0.0428117	0.0727979	-0.588089	0.556473	0.787149
																		RTTN	440.264	0.395767	0.130381	3.03547	0.00240161	0.031118			RTTN	394.797	0.191636	0.148187	1.29321	0.19594	0.44471
																		SALL1	482.844	0.926396	0.238486	3.88448	0.000102549	0.0021897			SALL1	324.979	-0.127899	0.169081	-0.756435	0.449388	0.706858
																		SCARF2	172.63	-0.926875	0.220052	-4.21207	2.53041e-05	0.000638262			SCARF2	193.568	-0.587149	0.240946	-2.43685	0.0148156	0.0731541
																		SCML1	856.43	0.817205	0.121369	6.73321	1.65963e-11	1.16872e-09			SCML1	577.293	-0.182058	0.12981	-1.40249	0.160768	0.393113
																		SCN7A	4044.78	-0.248036	0.0664043	-3.73524	0.00018754	0.00373198			SCN7A	4123.24	-0.112572	0.0648065	-1.73705	0.082379	0.254895
																		SDC3	22776.8	0.233883	0.080793	2.89484	0.00379347	0.0451056			SDC3	20974.5	0.105696	0.0657305	1.60801	0.107832	0.306289
																		SEMA6B	1500.75	0.617965	0.143167	4.31639	1.58604e-05	0.00041841			SEMA6B	1316.03	0.28987	0.135925	2.13257	0.0329601	0.133468
																		SEMA6D	7986.32	0.39	0.0990233	3.93847	8.20027e-05	0.00178185			SEMA6D	6973.71	0.117979	0.0728163	1.62023	0.105182	0.301233
																		SERPINB6	735.882	-0.365524	0.125563	-2.91109	0.00360176	0.0432336			SERPINB6	768.88	-0.0516643	0.127596	-0.404907	0.685546	0.863032
																		SH3D21	378.489	-0.565364	0.181595	-3.11333	0.0018499	0.0252902			SH3D21	398.479	-0.243149	0.16598	-1.46493	0.142939	0.364192
																		SIRPB2	17.1983	2.05507	0.712055	2.88612	0.00390025	0.0460582			SIRPB2	7.92779	0.17564	0.934305	0.18799	0.850884	NA
																		SKAP2	1355.49	-0.312118	0.103335	-3.02046	0.00252387	0.0324958			SKAP2	1438.39	-0.215141	0.0988026	-2.17748	0.0294446	0.12318
																		SKIV2L	1641.99	0.300859	0.0840474	3.57963	0.000344075	0.00629515			SKIV2L	1580.49	0.154515	0.0981461	1.57433	0.11541	0.319676
																		SLC10A4	1249.75	-0.637915	0.0994839	-6.41225	1.43389e-10	8.77266e-09			SLC10A4	1492.09	0.0348334	0.0926187	0.376095	0.706847	0.874258
																		SLC16A14	3885.48	0.222647	0.0731311	3.04449	0.00233077	0.0305801			SLC16A14	3639.67	0.095547	0.0677198	1.41092	0.158269	0.388832
																		SLC16A2	7710.76	-0.488385	0.0784314	-6.22691	4.75727e-10	2.73591e-08			SLC16A2	9609.94	0.271344	0.0812924	3.33788	0.000844201	0.00740625
																		SLC16A3	112.803	-1.06832	0.258286	-4.13619	3.53113e-05	0.000860399			SLC16A3	140.41	-0.340213	0.219091	-1.55284	0.120462	0.329011
																		SLC17A6	12026.3	0.196464	0.0540656	3.63381	0.00027927	0.00523722			SLC17A6	11078.3	0.0691276	0.0610364	1.13256	0.257398	0.523518
																		SLC25A30	602.869	0.368685	0.111026	3.32072	0.000897854	0.0139556			SLC25A30	513.392	0.140078	0.160653	0.87193	0.383246	0.64843
																		SLC25A51	623.956	0.37842	0.128497	2.94498	0.00322977	0.0398023			SLC25A51	582.967	0.258835	0.129996	1.9911	0.0464702	0.170922
																		SLC43A1	59.7361	-1.17583	0.366009	-3.21257	0.00131554	0.0190092			SLC43A1	58.6234	-0.869182	0.35176	-2.47095	0.0134753	0.0679928
																		SLC43A3	181.139	-0.649872	0.224331	-2.89693	0.00376829	0.0448994			SLC43A3	179.958	-0.341121	0.215514	-1.58282	0.113462	0.31607
																		SLC9A9	1743.68	-0.363967	0.111456	-3.26557	0.00109242	0.0163183			SLC9A9	1776.88	-0.202316	0.0930866	-2.17342	0.0297486	0.124015
																		SLCO4C1	98.7255	-0.823571	0.262539	-3.13695	0.00170716	0.0236575			SLCO4C1	107.332	-0.397258	0.297262	-1.33639	0.181421	0.424222
																		SMN1	884.329	0.588919	0.19351	3.04335	0.00233957	0.0306298			SMN1	546.722	-0.50387	0.493045	-1.02196	0.306801	0.575426
																		SPART	531.454	-0.572721	0.154465	-3.70778	0.000209085	0.00410291			SPART	501.339	-0.198882	0.143409	-1.38682	0.165497	0.400435
																		SPHKAP	1320.58	-0.5037	0.12754	-3.94936	7.83603e-05	0.00171785			SPHKAP	1689.87	0.345474	0.117981	2.92821	0.00340925	0.0233246
																		SPOCK2	21901.2	-0.235864	0.0752796	-3.13317	0.0017293	0.0238876			SPOCK2	22521.4	-0.122705	0.0693956	-1.7682	0.0770277	0.24355
																		SRGAP2B	622.815	0.544806	0.188765	2.88615	0.00389982	0.0460582			SRGAP2B	559.175	0.181258	0.179627	1.00908	0.312935	0.581661
																		STAG2	3295.95	0.331411	0.0752876	4.40193	1.07293e-05	0.000298569			STAG2	3088.79	0.217754	0.0980753	2.22027	0.0264004	0.113501
																		STAT6	941.988	-0.539257	0.0945678	-5.70234	1.18175e-08	5.77586e-07			STAT6	991.095	-0.231072	0.114322	-2.02123	0.0432561	0.162296
																		STRN4	7478.07	0.212575	0.0643255	3.30468	0.000950857	0.0146605			STRN4	7071.91	0.140855	0.0697678	2.0189	0.0434971	0.162979
																		STXBP5L	1172.33	0.253908	0.0859408	2.95446	0.00313218	0.0387937			STXBP5L	1090.6	0.0377775	0.109261	0.345755	0.729527	0.885258
																		SVIL-AS1	401.318	1.25331	0.258757	4.84358	1.27521e-06	4.20674e-05			SVIL-AS1	179.844	-8.32627	0.703889	-11.829	2.76547e-32	5.747e-30
																		SYMPK	3326.57	-0.217403	0.0663501	-3.2766	0.00105066	0.0158039			SYMPK	3204.95	-0.140673	0.0684226	-2.05595	0.0397877	0.153367
																		TAPBPL	45.1395	1.30965	0.423823	3.09008	0.00200103	0.027035			TAPBPL	42.8667	1.03047	0.415058	2.48271	0.0130388	0.0661489
																		TAX1BP3	1095.03	-0.343781	0.0992152	-3.465	0.000530228	0.00902172			TAX1BP3	1112.96	-0.184302	0.0917233	-2.00932	0.0445028	0.165517
																		TBL1X	774.678	0.663603	0.142764	4.64825	3.34761e-06	0.000102223			TBL1X	591.65	-0.00548729	0.131001	-0.0418876	0.966588	0.988359
																		TCEAL6	114.822	-0.888821	0.268551	-3.3097	0.000933975	0.014426			TCEAL6	123.934	-0.478295	0.275937	-1.73335	0.0830336	0.25634
																		TEAD1	290.801	0.946347	0.296133	3.19569	0.00139499	0.0200064			TEAD1	220.824	0.49192	0.202255	2.43217	0.0150086	0.0739311
																		TLX3	1163.17	-0.446356	0.152698	-2.92312	0.00346538	0.0421043			TLX3	1215.6	-0.193723	0.124692	-1.55361	0.120277	0.328666
																		TMEM121	208.104	-1.12663	0.24282	-4.63979	3.4877e-06	0.000105753			TMEM121	276.454	0.0542582	0.200843	0.270152	0.787043	0.912495
																		TMEM129	1098.38	-0.315408	0.087887	-3.5888	0.000332209	0.0061025			TMEM129	1084.44	-0.219194	0.105223	-2.08314	0.0372388	0.146151
																		TMEM191A	104.046	-0.954407	0.255114	-3.7411	0.000183214	0.00366704			TMEM191A	125.21	-0.0407009	0.235588	-0.172763	0.862838	0.946156
																		TMEM201	2140.85	-0.198526	0.0692803	-2.86555	0.00416291	0.0484961			TMEM201	2071.76	-0.175565	0.0809312	-2.16931	0.0300593	0.124996
																		TOX2	851.422	0.680365	0.107324	6.33937	2.3071e-10	1.37257e-08			TOX2	690.88	0.304903	0.118158	2.58046	0.00986682	0.0535715
																		TP73	179.868	1.59033	0.306442	5.18965	2.10691e-07	8.26149e-06			TP73	100.755	0.461771	0.283563	1.62846	0.103428	0.297656
																		TRHDE	241.232	1.41081	0.235561	5.98916	2.10932e-09	1.10614e-07			TRHDE	171.661	0.538812	0.259407	2.07709	0.0377936	0.14784
																		TRPC4	59.039	1.16364	0.385961	3.01492	0.0025705	0.032833			TRPC4	39.3003	0.223048	0.430203	0.518471	0.604129	0.817155
																		TTC12	232.928	0.691834	0.183107	3.7783	0.000157904	0.00320886			TTC12	208.224	0.320128	0.221368	1.44614	0.148139	0.372362
																		U2AF1	479.719	-0.716511	0.233977	-3.06232	0.00219629	0.0292156			U2AF1	575.056	0.226751	0.489628	0.463109	0.643286	0.84115
																		UAP1L1	264.789	-0.580911	0.165592	-3.50809	0.000451344	0.00788961			UAP1L1	294.715	-0.112518	0.154325	-0.729098	0.465941	0.720252
																		UBE2QL1	4609.32	0.573371	0.103994	5.51351	3.51739e-08	1.59699e-06			UBE2QL1	3916.01	0.245216	0.0990191	2.47645	0.0132696	0.0670744
																		USP6	520.194	0.63039	0.162772	3.87284	0.000107574	0.00228851			USP6	423.674	0.232977	0.158115	1.47347	0.140625	0.360563
																		UTP23	701.534	-0.361826	0.107504	-3.3657	0.000763503	0.0122083			UTP23	701.144	-0.286822	0.129889	-2.20821	0.0272296	0.116064
																		VAT1L	25489.8	-0.188003	0.0627679	-2.99521	0.00274258	0.0345889			VAT1L	26788.7	0.0566595	0.0580808	0.975528	0.329299	0.598185
																		VIM	16131.9	-0.370148	0.0671849	-5.5094	3.60062e-08	1.63049e-06			VIM	18314.1	0.112678	0.0714372	1.5773	0.114726	0.318578
																		VSNL1	327.216	0.675221	0.229524	2.94182	0.00326285	0.0400669			VSNL1	274.878	0.301714	0.192052	1.57101	0.116181	0.321276
																		VWC2L	519.867	0.731689	0.124437	5.87999	4.10288e-09	2.08811e-07			VWC2L	433.642	0.323909	0.135562	2.38937	0.0168772	0.0810894
																		WASH9P	666.187	-0.477864	0.130842	-3.65223	0.000259972	0.00491808			WASH9P	679.349	-0.300431	0.116118	-2.58729	0.00967348	0.052763
																		WASHC2A	3691.37	-0.203726	0.0666894	-3.05485	0.00225175	0.0298226			WASHC2A	3600.97	-0.110044	0.0682549	-1.61225	0.106907	0.304583
																		WDR76	94.2164	-0.871475	0.300653	-2.89861	0.00374821	0.0447528			WDR76	94.3525	-0.587921	0.347013	-1.69423	0.0902212	0.270625
																		WEE1	147.271	0.89886	0.260894	3.44531	0.000570396	0.00958752			WEE1	119.302	0.502323	0.273968	1.83351	0.066727	0.220939
																		XPR1	32996.2	0.289728	0.0825172	3.51112	0.000446229	0.00781603			XPR1	30290.1	0.149688	0.080033	1.87033	0.0614379	0.208237
																		YES1	899.881	0.388612	0.0954969	4.06936	4.71415e-05	0.00111111			YES1	832.696	0.169659	0.103713	1.63585	0.101871	0.294797
																		ZBTB7C	1137.42	0.730694	0.120752	6.0512	1.43767e-09	7.77559e-08			ZBTB7C	926.735	0.283313	0.13026	2.17498	0.0296313	0.12365
																		ZBTB8B	823.703	0.372258	0.125862	2.95767	0.00309977	0.0384473			ZBTB8B	749.942	0.212921	0.139546	1.52581	0.127057	0.339569
																		ZC3HAV1	1463.13	-0.363493	0.0881951	-4.12147	3.76469e-05	0.000912149			ZC3HAV1L	242.759	0.440947	0.172202	2.56063	0.0104482	0.0560506
																		ZCCHC12	12201.8	0.798413	0.0632651	12.6201	1.63609e-36	5.42834e-34			ZCCHC12	8633.57	0.0058809	0.0730407	0.0805153	0.935827	0.977928
																		ZEB2	722.87	0.489946	0.142372	3.44131	0.000578911	0.00969704			ZEB2	567.231	-0.0764932	0.127458	-0.600146	0.548409	0.781765
																		ZFHX2	3845.64	-0.339879	0.112127	-3.0312	0.00243587	0.0314566			ZFHX2	4028.82	-0.116322	0.115044	-1.01111	0.311966	0.581047
																		ZFHX4	1485.31	-0.411521	0.132723	-3.10061	0.00193125	0.0262361			ZFHX4	1582.27	-0.268987	0.264746	-1.01602	0.30962	0.578428
																		ZFP28	770.581	1.04755	0.114833	9.12244	7.34531e-20	9.74835e-18			ZFP28	256.11	-6.0794	0.345676	-17.587	3.0993e-69	2.57629e-66
																		ZIC1	22.0677	-2.63168	0.814631	-3.23052	0.00123566	0.0179906			ZIC1	25.5007	-1.36799	0.724211	-1.88894	0.0588999	0.202191
																		ZNF117	1390.89	-0.727694	0.108491	-6.70744	1.98066e-11	1.37238e-09			ZNF117	1658.41	-0.0515706	0.095818	-0.538214	0.590429	0.808091
																		ZNF138	581.228	-0.983961	0.137884	-7.13613	9.59962e-13	7.52829e-11			ZNF138	692.494	-0.228733	0.124948	-1.83062	0.0671577	0.221923
																		ZNF273	292.955	-0.798162	0.148925	-5.3595	8.3452e-08	3.58158e-06			ZNF273	345.251	-0.136304	0.140201	-0.972207	0.330947	0.59953
																		ZNF358	3763.9	-0.231588	0.0743757	-3.11376	0.00184718	0.0252731			ZNF358	3784.7	-0.170573	0.0796251	-2.1422	0.0321776	0.131052
																		ZNF429	778.314	-0.389919	0.119024	-3.27597	0.00105301	0.0158116			ZNF429	916.411	0.214275	0.111653	1.91911	0.05497	0.192314
																		ZNF440	492.321	-0.589192	0.140941	-4.18042	2.90971e-05	0.000724405			ZNF440	570.305	-0.00988338	0.138999	-0.0711041	0.943315	0.980466
																		ZNF471	493.619	1.25213	0.137408	9.11255	8.04663e-20	1.05976e-17			ZNF471	237.018	-3.37566	0.196924	-17.1419	7.22053e-66	5.45642e-63
																		ZNF584	577.556	-0.33245	0.115165	-2.88672	0.00389277	0.0460329			ZNF584	567.768	-0.320003	0.124366	-2.57308	0.0100799	0.0544972
																		ZNF667	329.354	1.5664	0.19761	7.9267	2.25038e-15	2.19354e-13			ZNF667	109.931	-2.11664	0.275716	-7.67689	1.62995e-14	9.09328e-13
																		ZNF705E	6.61529	3.71562	1.27324	2.91823	0.0035202	0.0426803			ZNF705E	3.69362	2.85037	1.67047	1.70633	0.0879468	NA
																		ZNF876P	94.063	0.751093	0.253144	2.96706	0.00300663	0.0373997			ZNF876P	79.2753	0.367452	0.301386	1.21921	0.222765	0.479288
Normalized genes (counts) in Q6 EMC10 HET																		Normalized genes in Q6 EMC10 HOM
Gene	Q5_1.1	Q5_2.1	Q5_3.1	Q6_1	Q6_2	Q6_3	Q6_EMC10_HET_1	Q6_EMC10_HET_2	Q6_EMC10_HET_3									Gene	Q5_1	Q5_2	Q5_3	Q6_1	Q6_2	Q6_3	Q6_HOM_1	Q6_HOM_2	Q6_HOM_3
C2CD6	0	0	0	0.530582	40.3215	0.423409	0	0.541163	3.26055									AC270277.2	0	0	0	28.499	30.412	34.13	6.54701	0	0
RPL23AP47	1.21542	0	0	16.9721	35.0109	35.4058	0	0	25.5958									C2CD6	0	0	0	0.530582	40.3215	0.423409	0	0	0
ZNF705E	1.18363	0	1.55569	20.0442	11.0659	5.80938	1.3252	2.0908	2.52413									LDHA	0	0	0.763467	6453.01	7250.13	5830.63	3.35508	0	1.06241
TP53TG3	2.06288	0.372168	1.11486	46.8544	11.6144	35.2468	0	0	0									RPL23AP47	1.18291	0	0	16.9721	35.0109	35.4058	36.4381	0	0
TPSB2	0	1.99591	2.38297	16.752	15.9346	20.5439	8.50913	7.51226	8.82959									ZNF705E	1.15343	0	1.52721	20.0442	11.0659	5.80938	7.83653	0	11.6445
HLA-DRB3	2.26148	1.78021	0.989501	25.2423	26.6154	20.792	4.82317	10.5072	2.13985									MYOD1	2.31305	0	1.52582	17.9474	8.84187	25.1424	6.70874	7.37268	9.53272
AC133551.1	0	5.57846	0	23.2136	15.4651	31.8947	0	0	0									HEPH	1.80556	1.42139	0.79586	102.357	119.253	369.325	8.69099	3.67429	1.10389
TP53TG3F	0	5.83154	0	23.7242	15.8053	32.5963	0	0	0									SIRPB2	7.39551	8.31779	6.28763	29.1109	44.5106	9.93608	13.9477	1.92833	9.68971
AC131097.2	3.75022	2.89455	4.07665	22.6123	18.0242	13.7984	16.1168	14.8934	7.68655									PIWIL2	11.9362	10.7016	16.8302	50.9056	30.8022	37.4417	11.6282	20.3936	11.5347
RNA5SP202	1.31107	8.65938	0.787929	49.8364	334.43	7.52922	5.15809	1.95686	1.59484									EEF1AKMT4-ECE2	15.1306	17.2826	14.4531	42.1954	90.7341	32.9175	21.1646	15.7727	19.0821
HMGB3	8.46417	3.2212	6.51361	5954.33	6861.3	6487.67	12.551	26.7303	19.5156									IRAK1BP1	32.2886	8.17924	12.2205	421.034	371.482	426.681	16.7971	29.5078	32.8177
TP53TG3B	12.0433	7.00946	3.89344	21.6456	55.1976	14.0053	0	0	0									FO681492.1	15.005	20.9044	16.7964	137.136	44.8849	106.193	32.4574	30.5549	37.0574
SIRPB2	8.12815	9.14135	6.85979	29.1109	44.5106	9.93608	11.6919	7.16888	16.7226									CEACAM21	22.0748	26.927	14.1397	47.1094	45.8102	65.706	36.2926	69.4769	30.5646
TP53TG3C	15.6702	9.76513	9.59836	91.2078	131.82	50.0921	0	0	0									INSIG1	18.0523	29.7711	31.617	5251.76	5359.51	5036.11	42.7308	49.6842	50.0714
CNTNAP5	10.1237	14.6998	11.5627	2738.66	2506.36	3122.6	22.2916	14.4354	2.31927									NEUROD4	25.3696	30.8994	31.315	53.7946	68.6152	87.1494	30.2348	26.3463	27.5245
AC006453.4	14.2834	11.2019	13.202	64.4333	56.2852	51.1761	14.5924	4.16854	20.1188									AC068446.1	46.2989	26.3648	25.1636	66.5176	71.7961	101.473	43.5799	67.3861	69.9096
PIWIL2	12.8094	11.4838	17.9287	50.9056	30.8022	37.4417	33.0407	21.4239	16.5258									PDGFC	37.5125	32.1486	32.369	73.2475	91.6814	209.708	59.2114	74.0208	34.6419
ID1	18.4543	35.4466	17.5964	99.9292	78.3492	118.869	41.7975	54.2342	55.4771									DECR1	23.6484	45.4299	48.1855	544.775	659.269	616.633	0	0	10.602
TAPBPL	17.3406	31.6944	33.1771	70.3238	44.1496	78.5347	75.5495	44.2896	43.9772									GSG1L	38.3852	54.9421	38.2151	163.497	144.867	260.698	57.0725	53.7882	74.4277
DYNC2LI1	30.9781	33.6125	24.8443	748.068	774.401	717.135	49.0935	36.4557	42.7261									HSPE1-MOB4	48.6795	61.0361	32.6464	233.669	308.415	280.43	89.6182	74.2984	85.5851
EYA3	39.0567	37.2957	15.5549	2336.49	2308.03	2603.78	26.5011	11.4978	2.52377									LRRC37A6P	47.8601	52.9623	45.9467	76.117	77.2492	199.889	50.4856	83.3132	55.999
BMS1P8	29.3771	18.9213	57.6981	362.938	324.95	417.141	62.1843	54.1947	30.163									BMP8B	38.0385	64.5225	44.3075	119.179	120.656	112.351	89.6061	86.4245	74.0996
HERC2P8	53.5023	26.5406	34.2156	143.944	113.389	163.719	10.2836	40.9698	40.5171									NOTCH1	51.5938	59.4907	38.3804	202.964	135.786	61.6829	57.2854	65.1804	85.4672
LHX2	30.7521	55.468	47.5901	115.245	114.538	115.935	28.6337	94.995	33.8648									KCNH3	53.1616	57.9811	39.5337	210.563	204.698	198.82	65.1966	53.2692	60.7476
TLX2	69.8526	36.4626	32.3962	113.192	141.516	74.7937	32.8262	59.8554	42.999									CTNNA1	41.036	51.4722	61.8371	6185	6545.46	5051.17	56.2123	38.7014	59.9692
GRM4	54.3627	54.0623	39.6802	891.86	865.679	968.283	60.9341	94.1456	85.8868									ADAMTS16	48.277	45.851	62.3959	132.799	120.735	77.5146	41.6786	62.4663	64.7373
CU457734.2	41.9727	52.6445	62.7843	847.148	805.697	798.974	82.7851	85.726	57.3389									FOXI3	54.298	53.3085	50.936	33.7617	34.2912	100.657	30.3677	54.5248	78.7275
HYDIN2	54.7194	68.6056	36.4275	128.441	86.497	113.779	75.6696	71.7965	88.3967									AC234782.3	66.1975	57.2935	48.7305	114.131	88.2109	149.529	92.5703	69.4361	130.352
ADAMTS16	50.9459	48.3834	65.362	132.799	120.735	77.5146	64.4821	76.6561	82.7431									IGHMBP2	79.5169	63.5047	54.0899	1646.47	1551.49	1542.62	88.7622	89.3451	108.273
SSC4D	51.5458	63.3023	52.5325	128.13	110.428	106.863	93.3365	75.8054	92.1507									TP73	117.423	65.5636	73.2033	211.699	202.648	393.409	116.407	111.994	119.942
ZNF876P	72.2095	66.8223	66.8448	111.826	110.137	131.792	69.8562	77.9153	76.9729									WEE1	89.5816	115.82	89.9317	137.5	198.276	239.512	154.179	169.454	96.8455
FOXD4	78.6055	80.1613	83.0317	412.681	423.349	417.798	118.023	115.84	121.829									EYA3	101.424	117.608	92.1144	2336.49	2308.03	2603.78	106.417	183.16	228.255
NFATC4	71.8114	110.099	68.5691	109.69	128.217	152.069	139.41	105.373	112.165									GRIK3	90.1661	155.354	92.5215	1430.48	1379.54	1873.28	89.6168	123.857	100.105
PLCG2	81.0388	127.183	99.7022	176.322	680.311	335.908	137.912	114.359	227.824									FUT9	152.07	138.125	63.4209	844.264	747.701	1082.33	149.017	158.114	117.491
DDIT4	112.696	125.814	80.0868	1039.57	1057.58	1169.04	139.073	161.147	107.085									CRLF2	109.375	123.622	121.384	181.233	168.381	236.026	177.263	181.24	138.777
ANKFN1	95.6329	111.143	117.062	191.834	178.764	144.597	103.048	99.421	134.447									HOOK1	131.746	119.468	103.909	1264.96	975.009	1136.41	132.182	139.955	142.157
HR	147.407	133.664	115.408	440.34	524.264	438.332	208.699	104.346	180.718									ECEL1	132.656	140.869	82.4769	610.661	721.212	998.797	115.319	42.1508	105.869
VAX2	142.213	117.696	142.066	351.294	324.205	189.626	121.249	158.213	155.309									DBNDD1	148.702	112.461	121.444	6288.91	6512.13	5658.98	139.132	134.143	116.117
AC135983.2	144.863	140.258	121.614	274.173	190.35	187.847	248.771	140.922	179.851									IRX1	129.985	142.132	137.655	1024.77	1188.41	1150.06	142.05	176.772	206.588
SVIL-AS1	89.0759	182.988	203.848	647.326	432.381	616.766	1.36306	1.34358	15.1307									TRHDE	170.301	91.9365	159.82	385.248	304.814	358.671	181.288	176.011	250.611
SMIM11B	222.222	135.105	120.863	337.375	304.314	338.249	557.036	66.1453	448.45									REM2	157.69	145.868	131.469	217.82	236.725	243.414	142.46	156.387	149.269
LOXL3	145.105	191.376	179.335	307.6	230.948	295.434	152.498	214.263	262.042									FAR2P2	164.956	170.429	151.949	3996.8	3645.24	2960.73	213.242	206.643	218.164
HSPE1-MOB4	162.573	212.088	180.742	233.669	308.415	280.43	228.369	236.034	230.753									KRT222	131.927	263.243	114.838	1023.4	1055.98	1093.77	104.204	119.288	79.306
AC133548.2	201.322	167.807	212.15	872.934	813.372	922.706	224.218	174.708	226.108									FGFR1	203.697	145.871	176.903	2316.98	2016.54	3404.9	159.008	110.372	137.804
AC234783.1	193.003	192.019	205.611	267.107	265.932	290.117	231.566	202.254	240.276									ZNF667	217.21	146.658	172.569	430.302	441.517	602.796	37.4768	38.2768	47.3956
TMEM187	210.066	177.469	219.147	303.672	260.408	302.506	256.022	261.786	265.507									HSPB1	158.265	206.478	177.253	511.869	413.407	400.1	140.367	259.733	201.418
PGF	195.264	220.924	197.44	357.857	318.975	360.197	222.589	257.578	300.435									TEAD1	213.659	193.934	145.145	370.404	206.877	569.678	225.118	258.143	288.944
MMACHC	227.77	233.964	193.402	286.634	309.885	320.424	242.857	313.735	281.346									TTC12	153.602	194.853	205.722	288.753	265.23	309.578	201.758	192.211	301.199
CEP41	245.56	236.942	191.986	2046.32	2147.99	2103.57	184.269	165.993	179.769									AC234783.1	187.552	186.604	201.28	267.107	265.932	290.117	215.489	168.735	256.117
RHPN2	224.907	309.431	258.16	455.076	378.68	362.476	278.045	279.21	389.949									CNN2	226.138	236.731	197.827	350.329	402.116	526.052	365.007	292.18	237.129
FBLIM1	262.947	324.784	257.227	2252.43	2199.62	1973.83	343.659	333.562	346.362									MMACHC	229.662	235.919	196.451	286.634	309.885	320.424	324.77	288.517	236.506
RTKN	280.767	283.713	310.598	421.042	370.548	493.983	283.414	395.723	384.28									ADRA2A	245.651	272.644	168.788	347.038	295.471	483.167	304.569	300.34	296.423
FRG1CP	308.417	310.633	260.39	1470.04	1474.03	1528.98	361.906	334.083	349.469									AC073508.2	235.562	198.116	262.689	347.562	474.363	406.215	277.797	250.766	347.102
NBPF26	297.002	397.216	368.526	435.788	542.795	538.916	472.788	453.29	364.884									AC139769.1	264.184	234.999	215.757	343.401	322.748	393.852	317.132	283.566	318.976
MAPKAPK3	313.537	412.81	373.913	510.68	547.687	500.31	440.392	381.836	466.523									RHPN2	209.025	287.595	241.704	455.076	378.68	362.476	289.709	334.711	292.669
NXPH2	330.463	351.569	438.558	673.144	658.129	634.872	385.651	335.389	607.092									VSNL1	263.529	291.351	184.943	300.702	380.578	524.606	306.911	322.667	279.866
ARHGAP27	416.853	365.484	347.857	554.214	471.417	486.466	497.966	384.532	382.493									FAT2	231.946	286.507	228.578	289.219	236.518	291.031	371.011	347.277	285.129
CDHR1	373.907	375.587	399.928	4477.68	4482.64	4611.93	333.379	374.692	323.858									LUZP2	280.88	315.252	192.344	401.974	396.934	563.99	356.291	344.824	399.036
RTTN	380.647	376.159	393.244	527.282	450.514	522.991	441.737	544.503	446.91									HSPA1A	261.948	294.448	255.717	532.411	559.828	380.924	262.622	271.559	256.998
ZNF85	413.128	395.427	368.529	458.11	557.931	575.483	506.614	472.652	457.251									NEB	258.863	307.83	278.027	438.17	379.335	547.308	297.377	306.998	310.344
IL17RA	454.102	365.267	377.238	590.801	670.353	710.117	273.877	322.055	356.839									ONECUT1	321.92	292.486	270.399	501.681	507.423	846.893	316.527	286.17	382.913
DNPEP	380.497	394.188	440.353	691.87	621.732	645.551	325.217	348.289	287.317									BCL11A	293.104	368.511	261.559	469.872	374.981	585.25	391.886	458.635	366.17
CLCN3	483.069	383.888	368.154	9440.42	9812.6	9542.07	298.369	358.951	296.961									CRABP2	308.761	349.723	319.536	427.319	393.978	892.278	258.303	303.979	284.97
PIGW	451.932	437.469	413.383	662.299	637.22	604.825	439.015	602.293	576.096									SALL1	348.994	354.567	313.943	437.929	507.715	951.351	250.997	323.314	358.06
AC006453.2	382.697	464.994	460.194	809.913	768.653	786.676	551.009	479.749	419.721									MAPKAPK3	294.575	387.864	353.899	510.68	547.687	500.31	470.623	479.067	379.396
ANKRD36BP2	465.163	450.47	510.346	599.495	592.398	578.221	546.569	523.158	592.926									NXPH2	322.067	342.654	430.576	673.144	658.129	634.872	438.705	409.846	549.518
DOK5	543.172	523.651	580.444	1176.67	1168.5	1325.78	511.998	671.781	606.535									RTTN	364.989	360.704	379.857	527.282	450.514	522.991	413.575	364.566	485.093
ECEL1	517.618	561.257	641.769	610.661	721.212	998.797	694.537	683.894	715.355									POU3F2	424.179	482.555	239.874	610.656	627.64	893.005	492.839	482.714	399.078
PRICKLE1	605.761	651.418	561.014	953.02	781.474	802.22	604.601	803.044	661.104									VWC2L	383.904	416.267	355.75	635.386	623.019	687.552	454.351	473.93	517.649
FDPS	635.876	610.104	611.58	8035.6	8576.35	8578.02	698.992	695.791	726.164									USP6	346.626	375.033	445.924	636.084	517.285	743.99	452.636	393.236	528.589
SCML1	601.719	574.883	683.641	966.171	1124.75	1188.39	583.853	587.203	638.532									PIDD1	454.509	451.965	319.681	640.027	599.607	718.04	536.497	475.701	490.748
SMN1	748.7	558.422	715.567	1423.91	761.018	1001.79	615.279	744.231	492.435									AL121845.3	491.539	440.796	461.967	626.803	569.225	610.675	550.76	496.293	626.768
FAAH	713.537	714.678	638.004	1975.23	1762.16	1790.3	592.676	578.117	648.183									ANKRD36BP2	462.046	447.474	510.675	599.495	592.398	578.221	570.843	475.501	638.986
S100A13	737.259	781.273	754.746	1138.68	1230.88	884.668	575.441	689.267	841.526									RORA	475.186	573.094	392.427	663.469	902.124	1157.65	596.998	610.24	673.871
RNF215	960.213	973.783	885.976	1161.66	1076.42	1131.17	1054.33	1049.37	959.999									SLC25A30	506.052	466.581	490.965	662.965	715.207	660.197	403.567	622.742	590.444
LACC1	901.889	851.405	1090.58	1220.8	1249.41	1293.12	1030.9	1013.45	1237.2									PTCH2	524.835	454.985	484.801	595.826	974.698	623.858	629.177	478.925	792.112
NOL9	959.244	1046.62	972.901	1215.63	1277	1171.32	1334.44	1162.13	993.816									FAAH	477	415.846	578.553	1975.23	1762.16	1790.3	648.806	630.266	576.052
TMEM233	1202.34	1141.17	1014.94	1978.59	1970.66	1527.48	1211.61	1264.24	1504.04									AL109918.1	518.023	512.742	462.826	692.638	761.7	800.45	541.977	576.834	638.073
EIF2S2	1337.63	1339.12	979.905	4218.46	4444.94	4264.6	1570.92	1596.83	1119.15									ERV3-1	602.062	431.846	477.538	1025.53	897.428	993.668	590.795	583.291	733.251
ATG4A	1348.13	1244.05	1230.08	1749.58	1690.31	1599.44	1364.56	1380.55	1496.42									CYGB	490	629.542	442.105	1270.44	1375.29	1174.25	672.877	640.106	704.555
AIFM1	1423.01	1466.95	1475.39	2774.12	2890.12	2694.21	1449.63	1484.52	1649.43									SRGAP2B	709.131	477.561	391.019	670.27	750.329	791.184	589.616	573.348	614.374
LRFN5	1556.06	1603.5	1485.25	1759.23	1990.4	2007.03	1953.2	1790.26	1626.33									IQSEC2	437.686	566.688	596.938	959.1	1020.74	1184.35	446.96	366.763	454.053
BTNL9	1669.7	1521.15	1971.39	2521.01	2364.84	2373.26	1888.69	1507.84	1871.59									DRD2	578.763	583.61	474.282	2049.83	2148.95	3149.61	437.217	416.258	481.537
MSL3	1780.13	1631.33	2177.36	3150.44	3346.42	3149.42	1874.76	1641.54	2099.93									ARID5B	514.162	574.377	557.986	699.378	696.212	824.279	535.943	635.909	607.656
PDZD7	1985.21	1785.02	1936.88	2647.45	2653.84	2435.46	2126.32	2106.09	2122.97									FAN1	523.042	520.843	619.865	1885.22	1864.13	1951.03	681.433	710.084	652.219
NRXN3	2932.14	3000.56	2702.47	3532.87	3514.18	3352.88	3035.81	3203.44	3804.03									ZEB2	548.447	563.771	634.184	867.369	689.376	977.067	502.735	547.465	606.784
C3orf70	2911.72	3043.28	2970.63	4064.1	4032.69	3205.9	2779.08	2874.7	2960.72									TBL1X	556.82	552.91	667.468	831.727	885.027	1132.87	550.533	566.968	655.199
MFN1	2883.97	3025.17	3240.59	3976.57	3275.4	3572.5	2900.34	3008.33	3328.31									HSPA4L	596.817	639.199	569.899	2501.86	2316.89	2222.46	756.126	797.224	570.094
PHF6	3188.53	3461.08	3381.21	6094.19	6196.82	5316.26	3375.75	3444.79	3700.96									PCDHA2	695.752	709.977	407.582	1128.89	1145.63	730.853	1101.2	1020.42	489.666
ATG12	3432.76	3380.24	3370.55	3791.97	3764.36	3792.13	3469.76	3771.02	3482.53									CCND2	686.794	727.868	403.652	1064.41	1101.26	1602.66	703.921	740.3	733.644
SLC17A7	3568.68	3450.15	3356.85	4263.72	4283.28	3778.28	3617.25	3911.75	3960.68									SCML1	593.648	567.2	679.459	966.171	1124.75	1188.39	483.43	560.015	580.007
ADARB1	3487.57	3659.46	3525.36	4280	4128.27	3797.35	4037.75	4970.96	3567.67									SMN1	710.2	529.733	683.791	1423.91	761.018	1001.79	753.315	363.374	239.92
MAB21L1	3969.86	4052.49	4222.74	5139.89	5429.75	4918.29	4247.11	4112.27	4823.49									CC2D2A	603.556	611.35	715.902	908.24	824.035	859.007	669.953	768.913	949.963
ITGA7	4829.64	4295.48	4362.98	6479.72	6135.08	6028.22	5249.88	4966.14	4803.19									EZR	695.206	696.353	626.211	1338.65	1565.59	1035.38	579.036	656.06	593.116
CAMKV	4871.68	4352.84	4359.34	5688.37	5939.88	4850.76	5232	4771.14	4221.04									ZBTB8B	762.233	736.02	587.743	868.802	921.498	995.28	745.321	725.315	943.022
MAN2A1	4672.15	4673.41	5570.16	6507.03	6667.05	5431.22	5117.54	4832.15	4886.96									YES1	824.875	745.767	782.217	1029.51	996.729	1033.17	828.04	897.576	917.702
MTMR6	5221.73	5373.2	5134.22	6095.61	5981.61	6042.62	5277.96	5497.09	5474.4									NKAIN4	812.018	915.637	725.78	1206.13	1312.32	1418.38	871.235	842.919	969.584
BEX2	6519.88	6620.25	6850.72	9668.25	11040.7	10686.3	6911.97	7208.27	7546.2									HKR1	966.585	732.76	809.539	1578.06	1636.53	1717.91	957.709	888.092	1198.71
SV2C	7516.49	7323.12	6459.48	8714.45	8096.75	9451.63	7541.29	7709.52	9702.05									ZBTB7C	962.955	784.457	762.994	1382.73	1296.28	1574.68	1086.09	1106.89	857.025
BEX3	15099	15501.6	14381.1	20637.4	23487.5	21483.5	11518	12342.9	12506.5									KLHL5	885.349	897.808	749.974	895.643	909.9	1172.89	1073.8	1007.67	964.158
APC	35916.8	36515.5	36671.6	52884.4	49374.5	43458.2	31123.1	33275.1	39205									CDH7	877.833	810.844	869.434	1333.1	1222.91	1689.53	1091.23	1025.21	952.894
AL121845.3	504.322	452.236	470.502	626.803	569.225	610.675	613.533	560.176	435.697									GNAI1	755.829	793.922	1148.01	5282.81	5467.25	5578.59	1117.65	1036.62	1373.86
HSF4	584.872	415.14	481.745	676.303	696.877	709.092	646.673	649.054	519.645									CKAP2	895.351	942.125	953.17	1298.65	1138.47	1301.6	1067.48	1038.99	1193.75
NEIL1	575.456	490.313	519.206	741.685	656.179	723.313	720.269	695.154	564.764									NOL9	904.262	986.683	923.92	1215.63	1277	1171.32	1082.93	1177.91	1083.65
SLC25A51	602.518	559.73	462.133	699.898	735.899	677.859	592.499	644.533	589.366									STXBP5L	1044.19	1085.45	1097.92	1309.05	1226.98	1290.32	1027.36	1016.14	1272.54
MID2	1013.85	1103.6	871.305	1350.26	1370.05	1298.8	819.751	736.49	729.726									CDON	1036.21	1141.87	1054.85	1343.75	1383.03	1437	1264.47	1130.75	1327.55
CYGB	1132.16	1028.33	1022	1270.44	1375.29	1174.25	800.375	866.139	1039.48									ASPH	1101.34	1066.04	1169.91	1353.08	1444.02	1485.55	1398.32	1304.92	1214.66
IGHMBP2	1299.69	1422.67	1263.26	1646.47	1551.49	1542.62	1174.18	1185.46	1584.02									CHRNA5	1189.55	1154.36	1075.21	1512.83	1252.2	1981.9	1070.61	1606.37	1516.68
RAB33A	1527.52	1584.3	1755.86	2444.03	2545.47	2238.6	1367.31	1307.65	1461.42									SEMA6B	1331.29	1328.52	895.018	1652.98	1835.21	1961.81	1498.02	1501.68	1341.62
PPAT	1695.75	1749.33	1491.62	2017.35	2035.57	1926.91	1884.99	1957.35	1804.22									MAGI2	1304.43	1265.52	1147.45	1332.54	2079.34	2526.69	1436.94	1321.53	2425.9
PNRC2	2085.39	2139.5	2333.89	2676.82	2689.93	2603.22	2487.95	2507.99	2371.14									IFT27	1243.03	1360.72	1217.13	1812.24	1754.28	1900.94	1331.41	1502.84	1461.14
PLCXD1	2575.15	2032.06	3067.18	3147.33	3908.96	3223.65	2533.3	2600.34	3202.53									EPN1	1267.24	1301.69	1448.78	7391.04	7676.77	6964.6	1498.07	1204.16	1587.76
TCEAL2	2745.57	2564.28	2990.65	3437.74	3922.02	3635.12	2384.89	2598.7	2575.29									SKIV2L	1483.78	1430	1571.94	1717.9	1832.28	1888.39	1847.3	1490.75	1659.15
TMSB15B	2920.24	3081.04	2451.67	3716.81	3814.64	3644.66	3013.06	3047.46	3212.69									BAG4	1540.85	1569.8	1529.77	1896.77	1968.42	1804.99	1697.32	1716.06	1693.84
CPSF1	3306.77	3016.28	3581.17	7179.07	6628.83	6826.21	3029.44	3775.48	3251.05									RAB33A	1487.2	1542.56	1722.16	2444.03	2545.47	2238.6	1325.18	1430.38	1330.26
ATP6AP2	13623.9	13369.8	13759.7	16453.1	17198.7	15303.7	8643.87	8708.13	7940.9									RGMA	1916.53	1838.42	1364.11	2037.29	2224.46	2890.67	1530.81	1545.34	1527.03
MORF4L2	17853.8	18195.5	14302.5	21699	22585.2	22066.8	15120.7	15801.2	15323.3									ADCY3	1901.55	1807.36	1517.7	2219.88	2142.9	2551.68	1871.88	2071.5	2324.71
BEX5	1746.93	1673.83	1545.99	1988.84	2116.74	2263.66	776.761	861.547	868.759									DPH3	1791.07	1786.66	1668.51	3882.41	3788.15	3529.99	1432.97	1539.69	1672.38
EN2	15.8428	18.2883	19.3465	1.0549	2.21298	1.93629	7.08817	6.51772	4.49579									FDPS	1746.63	1956.32	1764.39	8035.6	8576.35	8578.02	2039.04	2199.48	2107.32
AC019117.3	17.7459	20.5062	23.3262	0	0	6.7763	9.27245	0	6.72854									MSL3	1771.85	1623.83	2183.26	3150.44	3346.42	3149.42	1772.12	1926.31	2025.12
TMPRSS3	17.6292	25.2282	26.4502	4.95662	5.30539	5.5866	7.77405	9.57448	8.67585									CRIM1	2188.67	2018.34	1754.31	2217.08	2450.9	3232.69	1579.43	1806.55	1752.92
CCDC7	216.16	221.106	207.9	145.405	137.603	165.216	112.234	179.459	165.121									ATXN7L2	2286.19	2133.26	2255.33	2771.48	2624.78	2799.44	2572.16	2417.1	2555.82
MYOM2	222.231	200.609	225.592	107.626	150.536	146.34	192.321	173.387	124.081									PPP2R3A	2280.49	2481.13	2119.43	2843.17	2788.65	2907.84	2296.06	2697.06	2595.66
ATP6AP1L	228.142	209.91	211.261	138.297	169.135	159.003	161.529	162.149	157.294									RGS8	2591.57	2647	1770.1	3349.47	3535.21	3658.05	2807.9	2862.03	2729.42
PLEKHG3	257.394	258.319	272.417	155.278	140.911	173.157	222.916	248.718	181.661									MAP4K3	2388.47	2356.53	2380.89	2830.78	2709.53	3284.62	2654.48	2560.11	3192.3
FAT4	536.68	534.397	631.359	427.317	298.42	439.836	641.506	691.579	712.029									ASCC3	2257.66	2418.74	2495.84	2931.27	3070.18	3148.27	2839.02	2446.2	2883.16
HSPB1	610.584	653.911	578.765	511.869	413.407	400.1	543.507	604.937	573.888									PLCXD1	2548.25	2010.93	3057.58	3147.33	3908.96	3223.65	3364.56	2725.92	3142.85
ARL4A	640.871	656.092	627.74	495.861	517.604	506.143	651.138	650.572	622.517									NR6A1	2630.17	2562.38	2748.1	3940.43	3690.78	3887.21	2063.05	2128.15	2440.92
ASS1	702.131	733.466	682.988	299.232	329.421	580.532	741.248	747.141	763.829									CNOT9	2832.6	2733.07	2574.14	3425.54	3487.9	3128.77	2937.42	3334.56	3069.28
SLC6A9	859.626	746.043	774.289	547.045	579.628	710.979	832.56	840.163	871.665									STAG2	2914.05	2975.16	2679.08	3669.24	3505.69	3841.63	3042.09	3071.26	3851.12
ZNF429	947.592	861.355	772.619	736.902	642.9	639.14	786.939	858.376	716.933									PDS5B	3041.21	3276.8	3127.56	3490.32	3491.05	3781.37	2790.52	2827.85	3209.54
DAB2	894.11	940.763	881.919	49.7102	51.1164	45.7625	1018.21	1006.7	1140.87									PHF6	3144.76	3413.74	3359.46	6094.19	6196.82	5316.26	2697.85	2505.88	2670.29
SLC30A10	904.809	890.753	931.085	760.111	712.141	782.665	836.827	853.503	821.954									ADARB1	3423.13	3592.02	3485.82	4280	4128.27	3797.35	3932.82	3625.82	3540.86
DUSP5P1	928.84	952.161	1157.58	63.3916	61.7753	60.8042	978.086	934.472	1093.71									SLC16A14	3520.23	3590.54	3447.17	4300.32	4385.07	3869.51	3628.46	3746.51	3905.11
CEBPB	1068.13	1176.99	1079.37	138.265	143.692	149.901	1343.64	1257.58	1254.47									UBE2QL1	3854.46	3836.7	3063.77	5135.84	5283.2	6117.4	4375.83	4524.99	3840.29
GABRG1	1045.48	1103.76	1194.76	82.2537	111.831	107.537	826.6	843.231	831.648									RND2	3549.61	3743.12	3484.64	4107.62	4454.49	4845.09	3772.1	3975.83	3877.83
HERC2P5	1174.68	1095.88	1172.2	155.62	134.904	139.945	960.79	1052.9	998.453									NOVA1	3478.43	3708.96	3675.78	4196.1	4369.21	6055.17	3431.74	3581.68	3751.34
POU4F2	1437.16	1434.09	1255.98	962.119	868.5	761.843	1229.71	1287.59	1058.14									PIK3R1	3503.78	3852.01	3927.81	4602.73	4691.28	4947.65	3843.28	3985.56	4086.56
ZNF10	1444.19	1515.66	1516.22	1255.68	1214.04	1320.32	1238.51	1331.77	1347.86									RAB11FIP2	4053.7	3933.15	3697.18	4883.76	4133.41	5094.59	4039.79	3651.07	4261.68
CAST	1468.28	1536.75	1517.42	1363.52	1355.52	1237	1388.88	1459.9	1507.1									PBX2	5082.08	4671.27	4902.21	5925.26	6554.59	6550.46	5459.57	5011.16	5797.88
DNAH6	1485.53	1413.14	1638.5	161.62	131.547	215.305	1292.28	1369.59	1231.82									MAN2A1	4629.38	4630.85	5559.99	6507.03	6667.05	5431.22	4696.5	4775.48	5050.7
SPHKAP	1698.49	1689.26	1217.94	1132.45	1066.34	1076.25	1339.07	1475.66	1587.86									NLGN4X	5265.27	5434.68	5188.95	6108.37	6139.95	6416.16	5283.71	5278.42	5547.68
FANCE	1518.47	1558.72	1558.53	729.057	714.436	729.65	1696.9	1614.92	1597.97									ROBO1	5020.88	4930.63	6187.68	7292.17	7863.66	10666.8	5178.65	5422.62	6282.01
CYP2U1	1695.91	1746.28	1480.49	1114.72	1139.9	1102.18	1576.26	1534.84	1381.07									ROBO2	5660.69	5208.19	5802.44	7078.33	6233.1	7644.51	5067.96	5364.64	6124.8
FBLN1	1935.94	1774.76	1881.65	799.107	798.714	749.486	1954.62	1856.17	1740.44									NHLH2	5945.71	5806.4	5253.07	6917.67	6751.95	7278.63	5863.73	5968.02	5613.86
F8A1	2063.19	1921.49	2060.95	532.053	549.142	572.306	2119.6	2057.22	2423.29									NEO1	6567.11	6101.19	6435.44	7401.74	7930.04	9367.07	5808.31	6496.47	7051.31
CABLES2	2099.03	1995.74	2027.73	1706.99	1868.76	1584.23	1929.52	1806.2	1565.02									BEX2	6348.19	6446.25	6719.65	9668.25	11040.7	10686.3	5571.98	6195.29	5967.83
AKR1C2	2229.44	2209.97	2016.78	1623.63	1619.57	1698.51	2170.1	2055.53	1917.51									SEMA6D	6940.86	6673.38	6452.85	8398.56	8127	10649.9	7511.5	6647.96	7615.73
BTBD6	2187.17	2310.21	2218.71	1897.7	1998.25	1904.27	1934.83	2098.17	2119.68									STRN4	6865.5	6365.45	6949.83	7860.19	7910.25	8312.68	7854.77	7349.43	7046.5
TMEM201	2224.7	2248.49	2254.54	2018.45	1960.3	2002.99	2011.8	2133.29	2091.66									CACNG7	6868.48	6685.17	6947.03	8874.08	9246.44	7859.6	7488.77	8006.59	7422.16
CILP2	2419.63	2721.16	2479.87	269.832	285.537	277.298	2303.98	2342.97	2346.9									ZCCHC12	8456.76	8909.69	8481.02	15275.6	16384.4	14825.1	8876.34	9208.68	7868.93
TOPBP1	2461.41	2697.21	2541.87	2148.96	2259.08	2397.75	2280.96	2330.14	2355.84									CNR1	10505.8	10555	8833.88	12132.4	12182	13670.1	10512	10412.5	11739.5
PLXNC1	2758.91	3079.99	2495.86	2272.8	2283.13	1985.25	2488.99	2659.48	2345.89									RBMX	9644.68	10035.8	10384.4	12137.7	12977.3	13224.8	11204.1	10919.9	11325.1
NECAB2	2804.73	2906.57	2742.1	2181.53	2379.94	2524.36	2952.22	3331.24	2800.08									SLC17A6	10531.3	11081.3	10825.2	12652.2	12890.9	12990.1	11274.6	11834.3	10923.1
PRKAR1B	3011.57	3185.47	3170.25	1759.02	1964.96	1849.75	2929.49	3690.07	3688.18									CELF5	14270.4	13806.9	13640.6	16196	15770.8	15831.8	15281.5	14392.2	15161.3
CASP3	3256.54	3422.44	3309.7	2665.38	2973.32	2876.47	3487.59	3552.65	3044.08									BEX3	14681.6	15073.8	14086.9	20637.4	23487.5	21483.5	15708.8	16177	12910
HPX	7352.4	7257.58	8218.16	162.145	189.036	223.04	7455.5	6965.23	6747.15									MORF4L2	17153.6	17482.8	13843.2	21699	22585.2	22066.8	13992.2	14698.6	13149.4
FLT3	9181.58	9231.43	10050.7	152.934	160.357	133.042	8204.38	8534.55	9509.65									SDC3	21174.5	20742.5	18706.2	22962.9	23730	27160.2	21722.1	22320.1	21181.3
CNPY1	10292.9	10989	10507.6	3.68474	3.86234	4.50363	10714.2	10136	10544.6									CBX5	21370.4	21808	20104.8	24826.8	23937.6	24973.3	19223.9	20539.1	22486.7
RGS4	10299	10232.1	11788.9	7954.76	8306.23	9859.37	6270.37	6716.9	9732.98									XPR1	30443.4	30531.9	25189	35595.5	35207.2	38088.1	30652.5	31450.6	33473.3
TIMP2	11848	12100.9	11934.1	10256.8	10633.3	10675.4	11354.4	11282	10955.7									MAP1B	221691	217723	202628	284417	263277	285835	223099	229464	273367
OLFM1	16449.7	16938.4	17411.2	13566.7	15288.7	14768.1	13670.2	14813.4	16817.2									MID2	996.101	1084.33	862.38	1350.26	1370.05	1298.8	941.831	859.828	910.505
BAG6	17039.2	18201.3	18541.7	16308.2	15867.8	15967.7	16325.7	16476.7	16641.6									TRPC4	28.7868	51.5853	28.3836	91.0768	56.9005	96.7568	43.5668	50.7957	32.6835
VAT1L	26649.4	26922.3	27038.2	22413.9	23713.2	25366.4	25368.3	26015.6	28348.7									NT5E	24.1738	62.348	30.566	60.9838	112.599	99.295	72.6201	119.904	43.6587
ACLY	38623.2	39063.6	42566.2	35028	37238.4	35746.6	32701.9	33208.3	40457.2									ZNF876P	72.7137	67.2923	67.8093	111.826	110.137	131.792	109.327	64.4461	94.0635
SCD	49184.7	49610.2	52591.5	43032.4	44224.4	45146.2	43570.3	44458.3	51189.4									PCP4	88.3802	78.3603	141.917	207.233	217.541	231.201	151.955	159.183	144.11
EN1	17.6863	14.0194	10.7831	1.83759	2.88886	0	18.6001	18.1207	32.7878									KIF21B	166.346	167.168	103.77	28358.5	28672.8	29780.9	165.646	164.341	176.719
PYROXD2	44.5774	24.3692	28.6083	13.4285	22.9098	20.2954	35.1728	24.824	19.1048									AMMECR1	192.194	115.331	138.602	257.327	218.208	178.29	115.595	199.151	141.138
ANKRD20A5P	42.4139	35.7675	30.9388	6.89592	13.5782	12.3039	10.5586	18.0532	18.4099									ZFP28	519.597	508.726	485.962	1145.26	1032.5	937.372	7.02201	7.59228	7.76334
HHIPL2	52.7523	23.1875	36.5472	10.3492	8.77881	15.3363	9.92187	39.5285	41.041									DMD	519.522	500.875	559.277	1224.1	1299.63	1413.72	598.881	637.821	642.721
ANKRD20A2	69.9798	36.8139	25.3504	17.837	8.63571	13.9707	8.43867	0	26.7901									SLC25A51	590.305	548.411	456.114	699.898	735.899	677.859	616.915	662.999	623.057
ACSM3	49.7688	53.8736	47.6695	21.4988	27.6895	25.7084	60.1318	34.7368	45.3857									RAB9A	431.959	640.258	622.389	814.9	841.644	729.885	677.252	882.348	683.181
ZIC1	70.113	114.417	20.2972	10.4975	1.76897	7.57353	1.14793	21.0164	1.82361									TOX2	629.871	557.476	666.807	1090.77	1024.84	1030.5	751.901	720.153	819.074
PRIMA1	82.591	77.9082	82.5797	43.0459	51.7664	32.7658	76.8754	64.1427	69.4782									OTULIN	1045.49	1141.99	893.17	1226.41	1366.06	1385	1182.55	1128.23	1088.02
PAPSS2	44.3577	126.637	86.7101	36.296	39.1778	36.4561	56.1488	44.9288	36.8475									GOLGA6L9	1167.69	1121.94	798.689	1222.6	1166.36	1674.54	963.591	914.851	1031.42
APOLD1	79.1442	91.1218	89.0521	61.1725	37.6345	44.5513	57.1651	84.4342	89.8682									CLOCK	1009.37	1328.87	901.419	1449.02	1423.41	1648.55	1118.6	1009.82	1292.76
TFAP2B	140.029	132.413	51.5856	3.69613	0.970014	5.94118	48.6676	14.3609	2.0231									PIP4K2A	1929.87	1899.3	2236.97	2371.08	2359.27	2315.32	2056.73	1991.06	2326.33
IFI6	138.037	109.647	124.911	82.6655	63.9136	72.3	155.717	68.9033	57.0475									PNRC2	2033.04	2085.9	2292.13	2676.82	2689.93	2603.22	1813.9	2161.17	2132.55
IER3	160.757	159.42	111.724	80.48	84.0839	69.1001	156.566	155.872	121.463									ZNF471	409.905	424.006	463.137	754.365	610.305	722.977	35.9624	42.4608	46.6388
AMMECR1	196.484	117.9	140.656	257.327	218.208	178.29	170.477	184.759	234.746									HPX	146.689	142.878	112.265	162.145	189.036	223.04	92.3534	62.4889	98.0537
SLC16A3	163.181	166.481	147.296	94.1762	63.342	61.6592	181.257	199.84	96.8635									CDH8	650.356	877.498	470.244	1097.24	832.786	1195.51	872.593	998.342	739.33
LAMA2	133.374	266.117	115.245	94.0524	85.5639	103.642	141.614	105.666	136.03									KLHL25	807.015	670.758	626.397	736.828	781.514	774.301	798.725	808.265	830.123
SLC6A1	165.635	204.526	155.338	118.719	88.1437	105.706	184.08	162.654	89.2518									SVIL-AS1	200.698	412.314	462.69	647.326	432.381	616.766	1.39189	0.655434	1.31797
TMEM121	350.873	244.758	202.915	156.999	124.694	109.691	287.837	269.156	276.803									PCDH19	740.821	692.972	439.417	1316.6	1214.43	1640.11	1172.56	1326.44	673.353
TFAP2A	341.242	366.244	106.19	46.3421	75.8481	99.5442	222.464	174.539	99.2095									DHCR7	950.897	981.721	1015.35	6406.03	6371.86	6046	1142.36	1216.97	1117.68
TPBG	218.983	241.491	374.913	98.6335	85.5441	129.587	250.214	278.453	193.909									MAOA	758.577	684.778	675.675	564.324	580.592	607.273	896.547	1130.86	975.025
MAP6D1	339.952	255.205	262.636	187.888	178.591	210.337	352.99	256.56	233.088									TAPBPL	17.7767	32.493	34.2629	70.3238	44.1496	78.5347	45.0955	60.0313	67.5411
DNMT3B	312	234.882	367.074	294.448	249.248	283.734	241.426	218.474	240.657									CPT1A	935.285	861.709	903.306	694.314	771.663	655.848	1301.54	1361.63	1313.06
MYO5B	303.112	317.451	316.403	483.148	539.338	394.119	372.284	304.958	366.782									DNPEP	4333.56	4321.52	4264.58	691.87	621.732	645.551	3888.32	4194.98	4083.59
AP1S3	298.738	359.559	301.935	238.331	194.878	239.814	290.053	260.838	233.803									RAP1GAP	4375.8	4262.22	4362.45	3971.99	3762.63	3140.81	4270.36	4208.64	4130.46
STC2	319.17	323.111	322.226	65.4471	73.741	177.839	436.706	761.569	362.121									GAL	4493.72	4668.07	3989.45	1059.16	1038.13	998.664	4929.49	5049.27	4827.22
ZNF502	393.141	410.11	354.326	267.118	306.63	293.794	281.021	265.878	342.959									FANCE	4290.11	4181.72	4739.03	729.057	714.436	729.65	4121.47	4071.61	4531.43
ZNF879	427.308	395.918	356.909	324.716	329.721	289.767	349.212	270.899	337.441									CHN2	4590.63	4592.4	4663.39	3961.38	4211.26	2884.81	4241.47	4374.79	3799.84
PCK2	349.857	421.265	448.799	260.653	274.086	327.96	417.377	392.009	329.103									IL1RAPL1	4759.17	4782.68	5136.8	123.22	96.5882	157.794	4705.72	5001.99	4606.28
SH3D21	503.988	364.608	459.648	271.621	272.547	370.879	325.925	350.138	350.844									RALGPS1	5203.13	5124.93	5060.39	4803.88	4573.26	4832.11	4920.08	4294.5	5191.39
TTC30B	444.803	454.032	470.592	342.804	356.366	336.987	386.879	388.929	318.087									CDHR1	5070.34	4776.96	5667.29	4477.68	4482.64	4611.93	5052.09	4505.09	5971.64
LMO2	491.378	559.408	417.605	280.327	323.21	386.784	394.302	396.671	357.579									NAGK	5322.41	4970.11	5261.5	4694.74	4788.3	4515.46	4951.91	4658.34	4550.26
B3GALNT2	481.248	515.277	514.693	378.618	455.506	384.117	456.287	368.27	389.447									IMPDH1	5513.81	5698.37	6049.35	4482.63	4515.81	4156.09	5594.31	5883.44	5734.56
HTR3B	578.258	462.216	499.659	609.472	648.226	803.336	416.165	367.868	725.434									PRUNE2	5311.68	5454.99	6621.66	3968.61	4064.95	4673.38	5664.42	5733.21	5707.9
PTCH2	559.185	484.739	512.739	595.826	974.698	623.858	636.022	476.72	552.371									CYP27C1	6814.16	6792.71	6960.64	710.147	777.04	805.284	7068.98	6910.69	6217.75
IRAK1BP1	432.95	560.528	586.144	421.034	371.482	426.681	418.8	426.825	414.856									CENPBD1P1	6899.85	7096.9	6994.53	6254.7	6409.9	5925.5	6459.27	6363.73	6673.77
AHRR	513.295	609.053	490.644	743.563	747.59	608.849	433.334	483.241	511.497									CTHRC1	6062.52	7095.81	8481.81	168.114	181.436	135.858	6213.16	6221.95	6377.15
ADM2	509.263	471.273	659.205	303.423	314.398	476.061	501.248	504.364	540.003									DES	6875.51	7344.94	8769.21	17.9341	15.6843	8.47421	6560.36	6550.11	6911.57
SPART	594.63	472.389	601.161	413.057	371.609	497.311	473.229	428.678	489.068									EPHB1	8494.31	8014.28	7982.21	1992.78	1966.94	2791.45	7653.5	7678.2	6532.04
U2AF1	697.246	618.573	354.926	346.039	456.613	285.583	312.388	386.862	888.935									RAB11FIP4	8606.81	8145.72	7941.63	7315.85	7484.92	7265.96	7043.48	7503.07	7510.19
AC009690.1	603.199	538.848	559.296	470.41	456.014	384.473	593.542	537.45	490.657									CD99L2	7990.24	8306.63	8697.9	5689.73	6016.9	5577.28	9910.09	10204.8	9570.37
PCDHA2	714.339	728.907	415.398	1128.89	1145.63	730.853	351.882	333.984	288.093									RTL8C	8601.84	8144.7	8504.41	7795.02	7844.2	7253.23	8530.15	8559.78	7422.27
ZNF584	599.536	683.113	624.079	509.893	495.833	528.601	503.124	555.73	555.141									SLC16A2	9177.65	9167.08	7784.86	6314.13	6592.85	6344.4	11001.1	10797.8	9731.16
MFAP3L	688.049	716.278	512.08	794.053	909.215	793.774	746.581	760.189	981.721									LAMA2	8035.82	8620.36	9637.15	94.0524	85.5639	103.642	9488.04	10135.6	7853.04
SERPINB6	731.497	739.542	921.36	647.775	616.282	666.684	635.332	639.082	708.074									FBLN1	8953.6	9002.66	9873.61	799.107	798.714	749.486	7957.92	8589.87	8593.92
UBALD2	796.504	758.44	910.482	571.794	653.508	679.748	647.824	758.557	795.624									MVD	9545.77	8756.83	9555.67	8055.02	7698.91	8846.49	7650	7201.47	9416.08
RARA	900.432	863.146	1041.94	754.998	749.394	770.714	840.227	883.915	701.19									CKB	10327.9	10624.4	10155.7	9319.11	8976.96	8557.4	9306.86	9753.28	8599.97
ALDOC	1007.02	882.584	952.405	739.377	837.29	748.681	1008.61	1191.57	897.525									RGS4	10300.4	10233.9	11877.7	7954.76	8306.23	9859.37	12972.2	13528.4	12445.3
PCDHA11	1217.56	1141.21	1630.72	826.31	896.834	1165.61	1182.7	952.715	1648.22									CACNA1B	13463.6	12768.2	13215.2	11652.9	10510.5	9920.64	11526.6	11606.2	12831.7
ZFHX4	1622.96	1369.48	1689.44	1529.47	1087.5	1208.26	1120.78	1035.02	1803.67									RPL13	13597.6	14190.3	13286	12584.9	12232.9	10338	13457.1	14055.9	11633.9
DRP2	1938.96	1918.87	1521.19	1299.91	1366.63	1206.68	1561.96	1656.45	1416.48									VIM	17947.9	18130.5	16721	14555.1	14523.9	13141.5	19300	20330.3	17454.7
KLF3	1916.48	1818.88	1989.46	1507.7	1456.65	1621.73	1667.18	1759.69	1734.53									PIEZO2	20170.8	20171.3	20879.3	18623.2	18773.7	12513.1	18676.4	18670.2	18233.1
LYRM2	1719.19	2080.31	2011.93	1602.51	1752.19	1510.82	1596.78	1830.05	1669.54									ATP1B1	20447.3	20546.8	20389	17259.5	18425.7	17645.3	19918.5	21609.4	18758.6
MTHFD1L	1928.45	1818.76	2283.2	1539.5	1711.08	1513.2	1804	1861.3	1598.62									SPOCK2	22504.5	23496.1	24433	18309.8	21812.3	20225.5	22436.8	22473.6	19784.6
MPP3	3485.16	3280.26	3615.4	3002.02	2936.24	3169.7	3396.88	3057.88	2862.59									KIAA1549L	25634.3	24983.6	23290.1	4981.05	4882.79	5207.91	24453.2	23623.6	26155.3
TBL1XR1	3586.95	3865.8	3091.75	2792.6	3249.94	2316.65	3635.37	4812.13	2868.67									VAT1L	25982	26249.4	26556.1	22413.9	23713.2	25366.4	26610.8	28720.2	26613.4
LPAR2	3594.4	3034.19	3972.27	2897.14	2678.39	3147.79	3057.34	2985.57	3298.72									MT-ND3	31655.7	30033.7	31161.4	25305	27248.8	24836.7	29418.6	27992	26807.2
ACSS2	3604.96	3451.4	3816.29	2837.09	3250.35	3178.22	2968.43	2554.95	3538.4									PJA2	30893.8	32413.4	32758.2	29818.2	30215.3	27100.6	31784.2	32757.1	30890.4
SHMT2	3561.55	3375.28	4099.48	2325.22	2624.5	2969.89	3167.69	3330.03	3307.61									TCEAL6	125.579	134.49	172.457	86.8599	60.2272	94.6886	79.7779	142.519	88.7818
PDZD8	3824.32	3669.5	3671.86	3488.37	3302.38	3214.06	2897.17	3497.31	3512.26									RPL23AP53	153.453	152.64	139.329	94.0776	101.591	106.01	124.485	115.972	113.73
ZNF358	3944.21	3708.63	4112.01	3648.56	3333.61	3405.55	3589.99	3409.33	3850.38									CARD9	149.679	124.523	173.946	98.7608	93.761	76.9917	112.956	131.403	112.514
LGALS3BP	3963.31	4035.9	3941.18	3526.83	3361.08	3503.77	4063.61	4261.2	3398.18									EEF1DP4	182.345	127.732	145.53	1.05612	0	0.962452	112.705	100.372	98.8779
RBFOX1	4444.28	4634.1	3344.08	2990.64	2813.13	3394.57	5460.63	5557.41	5106.36									SLC16A3	160.545	163.799	145.988	94.1762	63.342	61.6592	117.75	111.816	142.565
EMX1	4846.75	4816.83	5536.84	51.9503	55.6942	81.2144	4343.09	4575.77	4641.65									RNA5SP283	180.905	171.492	149.837	101.707	92.8385	79.0568	116.389	124.806	120.773
RALGPS1	5161.54	5083.71	4983.09	4803.88	4573.26	4832.11	5025.67	5546.83	5133.85									ANGPT2	156.322	181.711	174.48	102.745	120.497	65.3465	135.982	143.21	128.579
CDON	5026.01	4734.96	5576.5	1343.75	1383.03	1437	4046.19	4137.22	5323.1									ANO2	164.246	185.825	164.792	113.95	132.171	74.3663	132.764	199.367	132.012
CTXN3	5998.89	5398.16	5692.04	124.001	134.166	113.538	6637.26	6409.42	5592.92									AC026273.1	176.263	157.12	207.483	54.5921	62.5371	37.4366	183.127	156.935	182.182
INSIG1	5673.56	5863.18	6178.92	5251.76	5359.51	5036.11	5090.83	5138.41	6124.47									SLC43A3	198.581	184.752	218.873	115.353	125.913	182.378	124.55	158.312	194.683
AGAP2	6833.13	6094.08	5878.26	5581.04	5324.13	5490.66	6058.46	6136.95	5731.93									POLN	198.488	193.44	225.683	152.746	135.191	167.154	143.366	161.895	221.48
RAB11FIP4	8706.5	8239.66	7974.64	7315.85	7484.92	7265.96	8276.36	7365.76	7695.81									RINL	177.68	211.838	242.642	121.108	165.676	111.817	225.215	198.962	166.439
ATXN2L	11984	9869.27	13044.8	8866.29	8613.76	10799.6	9832.03	9627.02	10678.1									INTS4P1	189.506	225.37	220.49	67.9275	59.4397	88.6577	233.938	236.032	358.802
MT-CO3	159501	158786	185587	133772	137940	137122	137284	159805	148413									CCDC7	215.689	220.635	208.981	145.405	137.603	165.216	136.57	166.141	159.066
																		CCR10	230.734	237.631	183.497	148.312	140.494	137.318	189.157	181.014	153.179
																		SCARF2	229.989	273.199	192.939	132.654	122.57	101.927	168.801	191.36	105.121
																		LPIN3	282.453	224.82	302.023	175.264	180.059	111.172	189.395	189.65	275.294
																		TMEM121	357.836	249.628	208.473	156.999	124.694	109.691	280.666	271.802	290.316
																		APOL2	274.498	292.333	275.202	129.319	104.786	128.948	207.729	225.08	271.927
																		MAP6D1	357.129	268.113	277.947	187.888	178.591	210.337	268.74	297.069	236.749
																		UAP1L1	336.362	285.204	297.896	234.973	197.944	203.027	287.928	278.207	282.697
																		ITPRIP	326.816	342.767	307.654	292.331	276.003	274.451	279.699	258.958	188.888
																		ABCD2	360.639	339.865	301.041	208.803	164.97	157.907	375.315	363.652	344.012
																		LINC02495	371.475	327.426	332.391	264.755	281.04	229.931	370.056	426.555	391.591
																		ZNF273	368.663	372.478	344.033	204.876	218.292	218.278	327.585	331.708	327.038
																		DCBLD1	373.239	467.527	364.731	185.867	204.136	225.151	537.913	534.196	462.345
																		CILP2	470.882	374.221	361.52	269.832	285.537	277.298	351.97	371.034	379.091
																		SH3D21	490.554	354.907	450.705	271.621	272.547	370.879	330.55	338.865	425.295
																		C7orf31	437.482	389.868	471.625	299.004	332.439	258.662	333.623	301.449	370.018
																		PLEKHB1	441.697	455.078	464.721	344.621	406.037	297.343	395.918	409.577	455.278
																		B3GALNT2	441.876	473.144	476.079	378.618	455.506	384.117	475.737	487.399	387.044
																		RAD51C	580.791	469.263	488.895	335.966	298.376	219.537	456.787	469.933	374.166
																		U2AF1	662.353	587.646	339.658	346.039	456.613	285.583	762.222	785.226	313.23
																		FREM1	598.008	621.108	374.983	76.6269	109.269	162.852	645.421	694.516	806.707
																		ZNF440	537.911	588.122	589.322	329.804	421.277	430.027	522.795	504.734	678.948
																		KIT	624.233	593.771	498.425	212.621	247.972	379.111	653.081	656.034	598.501
																		FAT4	622.659	597.453	603.298	427.317	298.42	439.836	659.832	700.893	704.732
																		ARL4A	616.125	630.791	607.965	495.861	517.604	506.143	624.211	572.035	547.528
																		ZNF584	592.953	675.646	621.791	509.893	495.833	528.601	463.706	550.859	501.653
																		RHBDD1	696.578	648.228	587.922	564.377	495.887	550.364	520.267	498.101	534.825
																		DSC2	650.724	691.962	630.075	468.817	401.385	358.728	575.205	635.23	514.47
																		IRS4	752.282	754.46	599.018	45.3562	49.8014	93.9277	876.884	815.271	671.389
																		PROS1	694.441	797.832	738.98	627.404	608.142	494.214	670.959	720.265	706.128
																		ZNF138	683.86	782.588	774.357	362.304	352.078	456.911	565.629	626.707	721.822
																		PIRT	739.407	724.339	778.188	632.929	576.496	570.251	710.953	831.427	651.091
																		WASH9P	742.481	717.354	788.968	630.454	569.735	471.428	640.024	547.416	639.85
																		UTP23	820.572	728.994	761.947	584.572	629.9	626.427	581.227	569.351	744.775
																		SERPINB6	715.268	723.171	907.582	647.775	616.282	666.684	695.066	827.315	744.883
																		NOC4L	822.088	747.367	832.669	589.314	627.525	621.981	696.408	717.769	629.759
																		ZNF429	933.423	848.518	766.695	736.902	642.9	639.14	919.18	969.668	1060.98
																		IPCEF1	956.368	916.005	782.385	411.62	325.856	350.023	1006.04	942.322	1116.72
																		ESRRG	956.917	972.296	843.004	702.04	768.038	1368.04	1084.02	1143.68	1034.17
																		ALDOC	981.805	860.529	935.426	739.377	837.29	748.681	845.415	950.871	796.527
																		AC245060.4	909.861	930.275	956.633	785.032	779.85	798.109	792.185	828.114	779.908
																		RBMX2	874.606	896.677	1100.52	675.063	651.553	774.7	802.035	844.895	786.716
																		CTXN3	1116.95	1014.57	1015.73	124.001	134.166	113.538	942.203	738.751	918.493
																		STAT6	1033.26	1082.26	1094.17	796.231	780.072	728.689	798.695	887.622	1050.57
																		PRSS53	1103.28	1029.25	1285.33	893.134	869.325	791.036	1111.15	684.302	968.434
																		TMEM129	1186.91	1197.1	1115.89	985.407	960.553	989.438	1102.49	1017.22	887.034
																		DUSP10	1294.47	1295.98	955.3	753.702	833.364	1000.87	1166.54	1329.58	841.798
																		TAX1BP3	1170.03	1203.93	1177.75	1007.19	1024.42	865.008	1046.4	1093.79	985.86
																		KCNS3	1264.61	1162.98	1275.01	92.8246	75.0543	164.661	1122.12	1115.1	1143.67
																		CCNA1	1285.08	1198.47	1285.46	1009.41	1038.67	857.803	1202.74	1205.61	1241.47
																		FZD1	1220.67	1265.34	1319.11	178.215	171.624	427.252	2193.19	2220.84	1836.89
																		TLX3	1385.58	1301.88	1204.77	1202.62	1015.05	736.382	1228.01	1264.52	908.834
																		IPO4	1449.36	1436.76	1278.86	1108.11	1132.7	1177.21	1312.8	1177.37	1072.37
																		SLC10A4	1570.29	1518.71	1335.84	1033.01	970.905	928.235	1450.07	1542.36	1535.26
																		MEIS1	1312.86	1419.6	1714.06	1106.95	1258.47	1061.05	1300.47	1312.67	1502.26
																		SPHKAP	1644.68	1635.82	1188.08	1132.45	1066.34	1076.25	1866.86	1974.85	1828.91
																		AC138932.1	1816.82	1501.21	1202.69	993.368	922.332	1018.22	1552.89	1150.01	1136.81
																		IPMK	1669.51	1598.95	1277.05	1173.74	1130.4	1164.42	1288.87	1366.54	1090.01
																		LIPA	1560.68	1516.56	1473.54	1178.62	1282.27	1129.96	1411.18	1394.03	1472.08
																		CAST	1479.66	1548.75	1540.5	1363.52	1355.52	1237	1656.99	1603.58	1461.59
																		COPS7A	1468.33	1494.59	1613.15	1242.38	1211.36	1205.29	1354.26	1481.96	1247.36
																		IFI6	1587.18	1502.16	1496.11	82.6655	63.9136	72.3	1718.85	1689.17	1634.22
																		F8A1	1500.44	1540.29	1551.41	532.053	549.142	572.306	1961.26	1634.38	1758.63
																		SKAP2	1364.91	1607.76	1662.18	1131.74	1271.76	1226.45	1322.07	1279.37	1394.07
																		EHHADH	1639.17	1502.94	1539.97	118.941	80.8963	96.6943	1641.96	1835.05	1902.65
																		AP002956.1	1552.8	1530.16	1643.35	1297.16	1261.49	1270.94	1568.66	1860.56	1545.44
																		NANS	1547.33	1542	1671.76	1383.25	1432.33	1300.27	1352.49	1546.25	1355.17
																		CU457734.2	1659.24	1708.6	1459.18	847.148	805.697	798.974	1383.09	1450.1	1257.36
																		ZC3HAV1	1502.35	1613.59	1715.87	1309.06	1230.15	1301.9	1402.28	1453.63	1456.35
																		NPC1	1720.27	1528.95	1678.65	1477.97	1508.83	1453.31	1527.94	1424.85	1552.41
																		PCDHAC1	1789.53	1684.7	1538.05	1218.76	1279.14	1076.49	1645.66	1686.92	1814.23
																		EYS	1589.79	1696.89	1762.55	181.198	189.336	236.49	1886.19	1891.03	1812.09
																		ZNF117	1668.9	1566.63	1828.03	1084.06	916.426	1140.98	1573.64	1535.26	1777.98
																		LRRTM2	1609.5	1646.41	1816.68	1275.88	1129.94	820.78	1444.25	1400.2	1774.93
																		ZFHX4	1793.53	1513.49	1880.81	1529.47	1087.5	1208.26	1270.33	1077.23	1958.25
																		NXN	1900.2	1680.69	1855.5	1419.72	1580.08	1414.5	1680.64	1740.55	1748.99
																		C12orf4	1798.86	1853.03	1809.03	1680.53	1659.77	1487.82	1589.63	1552.13	1670.4
																		LYRM2	1665.04	2014.89	1962.98	1602.51	1752.19	1510.82	1567.38	1731.53	1556.07
																		SLC9A9	1830.74	1770.94	2099.39	1603.52	1662.36	1310.95	1701.63	1702.81	1555.78
																		PALM3	1937.87	1753.64	2039.65	1544.76	1704.21	1477.17	1900.14	2200.63	2071.59
																		HHIPL2	1833.02	1906.46	1996.49	10.3492	8.77881	15.3363	1603.19	1480.47	1826.19
																		POU2F2	2216.8	1845.52	1896.54	1693.19	1670.26	1456.91	2073.29	1970.53	2129.5
																		BBS2	1805.7	2064.72	2106.76	1575.57	1935.55	1736.34	1628.7	1660.07	1931.21
																		EXT1	2073.36	1931.06	2086.42	1214.05	1219.37	1257.14	1975.28	1786.45	2318.14
																		FAM3C2	2104.24	1999.62	2189.29	644.689	803.291	725.831	1723.15	1902.2	2026.52
																		BTBD6	2128.11	2247.94	2174.76	1897.7	1998.25	1904.27	2084.26	2186.24	1892.33
																		TMEM201	2174.56	2197.92	2220.03	2018.45	1960.3	2002.99	2073.04	1955.87	1809.16
																		PPP1R14B	2207.64	2156.22	2253.01	1985.49	2051.95	1725.03	1977.5	2030.87	1882.19
																		POLE	2160.06	1914.88	2586.2	2033.85	1765.05	1814.68	1951.57	1670.65	2208.16
																		MIOS	2245.06	2397.05	2065.18	1991.52	2133.68	1904.06	1965.71	1779.82	2087.11
																		PIP4P1	2250.27	2393.47	2495.72	2139.54	2149.65	1856.25	2119.44	2100.63	1977.4
																		CPLX1	2470.72	2304.6	2553.21	2078.24	2039.37	1784.44	2250.75	2339.37	2025.12
																		PDE4D	2875.5	2857.91	2325.06	2193.89	2083.47	2124.74	2338.21	2298.44	2333.39
																		CSRP1	2644.97	2649.14	2808.85	2054.13	2232.42	1883.47	2270.42	2548.34	2275.66
																		NECAB2	2695.97	2794	2655.26	2181.53	2379.94	2524.36	2675.21	2609.18	2377.67
																		PLXNC1	2696.23	3010.16	2457.19	2272.8	2283.13	1985.25	2139.17	2222.01	2716.65
																		HSPA1L	2650.53	2900.79	2874.57	95.1137	90.8334	66.8756	2651.37	2846.86	2526.87
																		CHURC1	2970.87	2977.79	3084.02	2696.86	2844.09	2490.36	2676.79	2757.71	2506.93
																		PCDHB2	3124.17	3196.89	2873.55	2700.6	2503.57	2267.9	3239.5	3149.46	2338.19
																		PRKAR1B	3010.21	3184.19	3192.25	1759.02	1964.96	1849.75	3693.17	3952.59	3700.14
																		MPP3	3277.23	3084.71	3424.85	3002.02	2936.24	3169.7	3078.44	3196.78	3147.79
																		PCYT2	3357.79	3052.7	3468.2	2646.47	2978.99	2807.91	3141.11	3402.76	3166.71
																		HSD11B2	3728.61	3481.93	2733.09	68.3715	61.0422	57.6493	3401.67	3565.03	2738.41
																		SYMPK	3329.88	3260.57	3491.72	3112.29	3011.98	3105.83	3070.56	3021.51	3055.47
																		MYC	3219.47	3369.62	3706.25	2601.75	2690.04	2347.01	3431.87	3285.77	2595.81
																		LPAR2	3549.89	2996.77	3952.09	2897.14	2678.39	3147.79	2920.89	2315.29	3262.97
																		ACSS2	3489.41	3340.94	3721.28	2837.09	3250.35	3178.22	3254.23	2877.16	3679.28
																		WASHC2A	3603.62	3808.05	3801.49	3567.52	3393.24	3334.91	3385.5	3418.01	3589.15
																		PSMC3	3774.51	3652.21	4134.76	3316.17	3584.78	3377.17	3418.02	3522.1	3090.08
																		LGALS3BP	3835.97	3906.44	3842.77	3526.83	3361.08	3503.77	3790.83	3883.25	3433.31
																		KIAA0319	4146.86	4088.34	3457.22	1021.1	994.171	936.045	4177.31	4096.55	5010.59
																		ZNF358	4020.78	3780.82	4222.85	3648.56	3333.61	3405.55	3664.18	3750.39	3269.19
																		RBFOX1	4380.35	4567.67	3320.35	2990.64	2813.13	3394.57	4330.87	4544.09	4795.24
																		ZFHX2	3938.2	3610.83	5022.32	3490.84	3475.85	3219.69	3785.46	3475.67	4340.46
																		SCN7A	4201.21	4386.03	4264.21	3879.85	3559.16	3655.28	3957.31	3865.78	4064.92
																		AP001458.2	22.206	9.96777	5.2831	0	0	0	0	0	0
																		MT-CO3	155232	154544	181956	133772	137940	137122	159097	144273	134813
																		MT-CO1	576668	552703	678354	523161	498352	499498	579740	508215	506553
																		PCDHGB7	379.809	345.988	250.966	28.3257	52.003	70.631	1165.78	1118.46	1242.45
																		MAGEE2	16.1587	10.8982	9.1505	0	1.1054	0	0	0	0
																		PDIA3P1	527.725	543.058	528.47	306.451	369.339	339.881	428.436	365.067	491.935
																		SPART	571.754	454.238	582.308	413.057	371.609	497.311	470.385	422.136	507.214
																		AC009690.1	587.978	525.277	549.215	470.41	456.014	384.473	525.259	324.604	422.38
																		ANKRD55	81.5937	40.2423	62.301	28.7449	22.4314	8.05003	54.8121	26.6101	19.8205
																		ANKRD20A7P	12.6932	17.256	16.7791	0	0	0	0	0	0
																		CNPY1	12.4158	18.0289	14.2855	3.68474	3.86234	4.50363	4.93452	1.99273	11.2201
																		AC078927.1	13.9319	19.0793	15.968	0	0	0	0	12.6094	0
																		CTBP2P4	6.9755	17.2726	25.0964	2.11203	0	2.88846	1.11373	0	6.35683
																		AC019117.3	17.2935	19.9844	22.8996	0	0	6.7763	0	0	23.2794
																		AC256236.1	13.9561	32.7529	32.7353	0	0	0	22.2991	48.3972	0
																		NHLRC1	35.8106	30.9046	24.4222	7.38698	9.95123	11.6091	17.8991	20.0148	14.8248
																		PRODH	34.2942	27.3787	43.2388	15.6128	6.04462	19.3117	12.9296	12.1991	24.0394
																		PYROXD2	48.1952	26.3483	31.1588	13.4285	22.9098	20.2954	17.6948	26.4338	34.0869
																		ZIC1	37.3502	60.9548	10.8926	10.4975	1.76897	7.57353	5.09466	25.2256	13.4864
																		AC120036.3	35.2984	56.191	30.8594	10.5003	9.76737	10.4495	50.1774	35.5671	48.5514
																		ACSM3	43.3063	46.8805	41.7864	21.4988	27.6895	25.7084	35.634	54.917	29.6512
																		MT1X	67.5479	49.8255	55.0488	32.5247	33.7075	18.2512	32.6647	41.2102	14.1347
																		SLC43A1	63.8204	93.412	69.7289	39.0999	24.3007	46.8006	32.3028	40.764	51.7123
																		PAPSS2	40.1675	114.68	79.0998	36.296	39.1778	36.4561	19.7297	65.9684	28.695
																		PRIMA1	80.4395	75.8825	81.0233	43.0459	51.7664	32.7658	73.7955	46.582	55.116
																		APOLD1	85.1829	98.0794	96.5557	61.1725	37.6345	44.5513	76.2302	92.1794	67.9306
																		WDR76	135.861	85.7177	117.946	75.8219	74.4787	49.0815	44.6634	65.3782	116.549
																		IER3	134.46	106.811	122.574	80.48	84.0839	69.1001	115.239	162.073	129.707
																		SLCO4C1	147.531	103.599	115.357	68.5525	74.1682	70.7068	85.13	64.2927	128.085
																		TMEM191A	137.178	125.061	118.674	57.5045	72.5666	82.1022	125.534	102.543	142.272
																		HYDIN2	156.682	155.386	109.697	128.441	86.497	113.779	105.915	90.924	78.6481
