# Supplementary material for: An antisense oligonucleotide-based strategy to ameliorate cognitive dysfunction in the 22q11.2 Deletion Syndrome
Source: eLife. 2025 May 27;13:RP103328. doi: 10.7554/eLife.103328 (PMC12113277; doi:10.7554/eLife.103328)
Supplement: Supplementary file 7. [file elife-103328-supp7.xlsx]

## Sheet: Supp File 7
Supplementary File 7. List of 103 DEGs normalized in both Q6EMC10 HET and EMC10 HOM lines, used for PPI konnect2prot network analysis.
Gene:
CDHR1
BTBD6
PYROXD2
CILP2
PRKAR1B
SERPINB6
HSPB1
IRAK1BP1
RALGPS1
RBFOX1
LAMA2
IER3
ZFHX4
SH3D21
B3GALNT2
U2AF1
MPP3
APOLD1
ZIC1
RGS4
NECAB2
CCDC7
AC019117.3
ZNF584
CAST
SLC16A3
AC009690.1
LYRM2
LGALS3BP
ARL4A
CU457734.2
PAPSS2
ACSM3
IFI6
FDPS
ECEL1
CNPY1
INSIG1
ALDOC
MAP6D1
RAB11FIP4
PLXNC1
LPAR2
ZNF358
MT-CO3
CYGB
SPHKAP
TMEM201
PRIMA1
SPART
TMEM121
ZNF429
VAT1L
ACSS2
F8A1
FAAH
PLCXD1
IGHMBP2
SMN1
ADARB1
NOL9
MORF4L2
SIRPB2
FBLN1
FAT4
AMMECR1
BEX2
HSPE1-MOB4
PNRC2
AL121845.3
ZNF705E
MMACHC
MSL3
RAB33A
RHPN2
PHF6
SVIL-AS1
CDON
HPX
TAPBPL
MAPKAPK3
ZNF876P
BEX3
RTTN
DNPEP
SLC25A51
HYDIN2
FANCE
MAN2A1
ANKRD36BP2
HHIPL2
EYA3
ADAMTS16
CTXN3
AC234783.1
PIWIL2
MID2
C2CD6
RPL23AP47
NXPH2
SCML1
PTCH2
PCDHA2
