# Supplementary material for: An antisense oligonucleotide-based strategy to ameliorate cognitive dysfunction in the 22q11.2 Deletion Syndrome
Source: eLife. 2025 May 27;13:RP103328. doi: 10.7554/eLife.103328 (PMC12113277; doi:10.7554/eLife.103328)
Supplement: Supplementary file 8. [file elife-103328-supp8.xlsx]

## Sheet: Supp File 8
Supplementary File 8. List of genes upregulated in Ctrl ASO1 treated- Df16(A)+/- mice compared to Ctrl ASO1 treated-WT mice but not in the Emc10ASO1 treated Df16(A)+/- compared to Emc10 ASO1 treated-WT mice.
Gene	Chromosome	Description
Emc10	7	ER Membrane protein Complex subunit 10
Mir9-3hg	7	Mir9-3 host gene
Plxnd1	6	Plexin D1
Cd68	11	CD68 antigen
Gm28439	1	Predicted gene 28439
Mir22hg	11	Mir22 host gene (non-protein coding)
Adgre4	17	Adhesion G protein-coupled receptor E4
Tnn	1	Tenascin N
