# Supplementary material for: An antisense oligonucleotide-based strategy to ameliorate cognitive dysfunction in the 22q11.2 Deletion Syndrome
Source: eLife. 2025 May 27;13:RP103328. doi: 10.7554/eLife.103328 (PMC12113277; doi:10.7554/eLife.103328)
Supplement: Supplementary file 9. [file elife-103328-supp9.xlsx]

## Sheet: Supp File 9
Supplementary File 9. List of primer sequences used for qRT-PCRs.
Target	Forward Primer	Reverse Primer
U6 snRNA	CTCGCTTCGGCAGCACA	AACGCTTCACGAATTTGCGT
pre-miR-134	TGTGACTGGTTGACCAGAGGG	GGTGACTAGGTGGCCCACAG
pre-miR-137	GGTGACGGGTATTCTTGGGT	CGACTACGCGTATTCTTAAGCAAT
pre-miR-185	GCGAGGGATTGGAGAGAAAG	GAGGGAAGGACCAGAGGAAA
pre-miR-212	CACCTTGGCTCTAGACTGCTT	GCCGTGACTGGAGACTGTTA
pre-miR-377	TTGAGCAGAGGTTGCCCT	CAAACAAAAGTTGCCTTTGTGT
pre-miR-485	GAGAGGCTGGCCGTGATG	GACACTAGAAGAGAGGAGAG
NANOG	TTTGTGGGCCTGAAGAAAACT	AGGGCTGTCCTGAATAAGCAG
OCT4	ACAACAATGAGAACCTTCAGGAG	GCCGGTTACAGAACCACACT
